# Supplementary material for: Synthesis and protein binding studies of a peptide fragment of clathrin assembly protein AP180 bearing an O-linked β-N-acetylglucosaminyl-6-phosphate modification
Source: Royal Society of Chemistry journal article supplement (doi:10.1039/c2ob07139h), 2012-01-01
Supplement: c2ob07139h.xlsx [file c2ob07139h.xlsx]

## Sheet: Sheet1
Sequence	Modifications	Protein Accessions	Protein	MH+ [Da]	Ba: Area	Bb: Area	Bc: Area	1a: Area	1b: Area	1c: Area	2a: Area	2b: Area	2c: Area	3a: Area	3b: Area	3c: Area	IonScore Ba	IonScore Ba	IonScore Bc	IonScore 1a	IonScore 1b	IonScore 1c	IonScore 2a	IonScore 2b	IonScore 2c	IonScore 3a	IonScore 3b	IonScore 3c	Exp Value Ba	Exp Value Bb	Exp Value Bc	Exp Value 1a	Exp Value 1b	Exp Value 1c	Exp Value 2a	Exp Value 2b	Exp Value 2c	Exp Value 3a	Exp Value 3b	Exp Value 3c	Charge Ba	Charge Bb	Charge Bc	Charge 1a	Charge 1b	Charge 1c	Charge 2a	Charge 2b	Charge 2c
FLPLFDR		P26772	10 kDa heat shock protein, mitochondrial OS=Rattus norvegicus GN=Hspe1 PE=1 SV=3 - [CH10_RAT]	907.504	0	0	2.62959e+07	2.10111e+07	3.08393e+07	2.1638e+07	52299961	0	2.66383e+07	2.37355e+07	3.26565e+07	0			39.25	35.32	35.22	32.89	34.44		37.16	44.16	37.1				0.000481343	0.0013807	0.00111225	0.00164494	0.0011512		0.000615389	0.000122786	0.00062395				2	2	2	2	2		2
KFLPLFDR		P26772	10 kDa heat shock protein, mitochondrial OS=Rattus norvegicus GN=Hspe1 PE=1 SV=3 - [CH10_RAT]	1035.6	0	0	7.46762e+07	5.69451e+07	6.98147e+07	43772785	6.27507e+07	0	0	47836024	0	3.71498e+07			35.85	30.69	34.4	33.92	31.01			36.52		34.59			0.000273017	0.00136496	0.000617233	0.000851568	0.00166425			0.00025627		0.000556058			2	2	2	2	2
LAEQAERYDEMVESMK		P62260	14-3-3 protein epsilon OS=Rattus norvegicus GN=Ywhae PE=1 SV=1 - [1433E_RAT]	1928.87	0	0	6.73137e+07	0	7.10127e+07	0	0	0	60199884	0	0	4.30712e+07			37.52		41.31	41.86			42.06	50.21	31.98	39.02			0.000575285		0.000210788	0.000231328			0.000220917	3.33479e-05	0.00215516	0.000438599			2		2	3			2
LAEQAERYDEMVESMKK		P62260	14-3-3 protein epsilon OS=Rattus norvegicus GN=Ywhae PE=1 SV=1 - [1433E_RAT]	2056.97	0	0	0	4.40659e+08	3.59067e+08	3.58649e+08	0	2.07152e+08	0	250725186	3.51935e+08	0				38.72	34.1	34.65		40.01		34.67	36.01					0.000698238	0.00180906	0.00176525		0.000513816		0.0017742	0.00115281					3	3	3		3
AVTELNEPLSNEDRNLLSVAYKNVVGAR		P68511	14-3-3 protein eta OS=Rattus norvegicus GN=Ywhah PE=1 SV=2 - [1433F_RAT]	3071.61	0	0	0	2.23907e+07	5.54127e+07	2.68223e+07	0	0	0	0	0	0				33.22	34.07	53.98										0.00290623	0.00240921	2.45966e-05										3	3	3
LAEQAERYDDMASAMK		P68511	14-3-3 protein eta OS=Rattus norvegicus GN=Ywhah PE=1 SV=2 - [1433F_RAT]	1828.82	0	0	278310494	0	0	1.87031e+08	0	0	0	0	1.18901e+08	0			53.13	50.88		33.51		46.88		52.36	32.93				1.53218e-05	2.44975e-05		0.00131469		6.46116e-05		1.82941e-05	0.00162986				2	3		2		3
LAEQAERYDDMASAMK	M11(Oxidation)	P68511	14-3-3 protein eta OS=Rattus norvegicus GN=Ywhah PE=1 SV=2 - [1433F_RAT]	1844.82	0	0	0	0	1.39193e+07	1.34872e+07	0	4.90187e+06	0	0	0	0					42.74	33.3		41.77									0.000130367	0.00114595		0.000156339									2	2		2
YDDMAAAMK		P61983	14-3-3 protein gamma OS=Rattus norvegicus GN=Ywhag PE=1 SV=2 - [1433G_RAT]	1015.42	0	1.41133e+07	0	0	0	0	5.05375e+07	0	0	2.48086e+07	3.42345e+07	2.83973e+07		42.46					38.76			43.6	39.64	56.67		5.662e-05					0.00013273			4.35482e-05	0.000108385	2.14768e-06		2					2
YLAEVATGEKR		P61983	14-3-3 protein gamma OS=Rattus norvegicus GN=Ywhag PE=1 SV=2 - [1433G_RAT]	1236.66	0	0	4.48557e+07	18376612	0	2.20172e+07	2.26349e+07	0	3.12382e+07	1.42562e+07	1.85892e+07	2.85698e+07			65.7	68.48		72.69	51.89		56.57	70.02	63.31	72.51			1.0497e-06	5.53432e-07		2.20691e-07	2.52386e-05		8.59141e-06	3.88208e-07	1.81997e-06	2.18809e-07			2	2		2	2		2
AVTEQGAELSNEER		P68255	14-3-3 protein theta OS=Rattus norvegicus GN=Ywhaq PE=1 SV=1 - [1433T_RAT]	1532.72	0	8.80785e+06	2.43904e+07	1.44302e+07	9.58608e+06	63938455	2.88358e+07	8.65542e+06	33766886	3.3101e+07	19144619	2.35933e+07		92.98	56.57	35.33	86.33	107.28	103.26	101.13	86.73	119.49	60.21	94.83		2.13988e-09	8.92185e-06	0.00120167	9.89439e-09	7.9504e-11	2.02987e-10	3.27634e-10	9.5546e-09	4.89203e-12	4.04938e-06	1.47983e-09		2	2	2	2	2	2	2	2
LAEQAERYDDMATCMK	C14(Methylthio)	P68255	14-3-3 protein theta OS=Rattus norvegicus GN=Ywhaq PE=1 SV=1 - [1433T_RAT]	1920.8	0	0	0	0	6.3422e+07	0	68679256	9.2102e+07	0	6.03898e+07	0	0				38.39	40.3		37.69	61.11	33.71	37.9	53.11					0.000231803	0.000135322		0.000263835	1.27786e-06	0.000638398	0.00025949	7.32979e-06					2	3		3	3	2
GIVDQSQQAYQEAFEISKK		P63102	14-3-3 protein zeta/delta OS=Rattus norvegicus GN=Ywhaz PE=1 SV=1 - [1433Z_RAT]	2169.07	0	0	0	0	0	2.78885e+07	1.17426e+08	0	8.10174e+07	0	0	0	69.07					72.09	58.93		76.71				7.80442e-07					3.52269e-07	8.0601e-06		1.33315e-07				3					3	3		3
LAEQAERYDDMAACMK	C14(Methylthio); M15(Oxidation)	P63102	14-3-3 protein zeta/delta OS=Rattus norvegicus GN=Ywhaz PE=1 SV=1 - [1433Z_RAT]	1906.78	0	0	0	0	1.54802e+07	1.35342e+07	0	0	0	0	7.31232e+06	0					36.56	38.63		31.57			30.6						0.000220277	0.000150797		0.000870783			0.0010887						2	2		3
LAEQAERYDDMAACMK	C14(Methylthio)	P63102	14-3-3 protein zeta/delta OS=Rattus norvegicus GN=Ywhaz PE=1 SV=1 - [1433Z_RAT]	1890.78	0	0	0	1.11767e+08	315006611	4.00563e+08	0	5.11218e+08	0	3.56243e+08	0	0				45.83	41.38	32.43	45.07	40.82	41.11	37.69	48.9	39.28				3.2652e-05	9.09725e-05	0.000571479	3.88965e-05	0.000103493	9.68077e-05	0.00021277	1.61031e-05	0.00014754				2	2	2	3	2	3
SVTEQGAELSNEER		P63102	14-3-3 protein zeta/delta OS=Rattus norvegicus GN=Ywhaz PE=1 SV=1 - [1433Z_RAT]	1548.71	0	2.54316e+07	6.2799e+07	2.97608e+07	0	131214372	7.00702e+07	0	0	7.57263e+07	4.87835e+07	5.06489e+07		109.24	107.41	72.07		106.18	85.12			105.29	106.35	93.54		3.75241e-11	5.17422e-11	1.86261e-07		7.5912e-11	9.6897e-09			8.43034e-11	7.29979e-11	1.26138e-09		2	2	2		2	2
SVTEQGAELSNEERNLLSVAYK		P63102	14-3-3 protein zeta/delta OS=Rattus norvegicus GN=Ywhaz PE=1 SV=1 - [1433Z_RAT]	2437.22	0	0	111337991	0	161022820	1.34178e+08	0	0	0	0	65881749	6.57353e+07			45.51		47.55	33.88					35.56	45.43			0.000179962		0.000116902	0.00274205					0.00180681	0.000181875			3		3	3
SVTEQGAELSNEERNLLSVAYKNVVGAR		P63102	14-3-3 protein zeta/delta OS=Rattus norvegicus GN=Ywhaz PE=1 SV=1 - [1433Z_RAT]	3033.56	0	0	6.15511e+07	0	1.67762e+08	9.25904e+07	0	2.17003e+07	2.62776e+07	5.74996e+07	0	3.56228e+07			59.9		56.64	57.08		48.41	36.05	38.51		58.05			8.18634e-06		1.73416e-05	1.57687e-05		0.00011609	0.00204858	0.00111334		1.3004e-05			3		3	3		3	3
VVSSIEQKTEGAEK		P63102	14-3-3 protein zeta/delta OS=Rattus norvegicus GN=Ywhaz PE=1 SV=1 - [1433Z_RAT]	1504.78	2.58917e+07	0	7.68372e+07	31675408	34827269	4.10775e+07	3.2762e+07	1.01269e+07	6.15552e+07	3.92599e+07	2.96113e+07	5.35057e+07	39.49		73.32	65.61	37.53	82.02	45.42	83.24	67.85	80.58	69.31	60.94	0.000652271		2.7004e-07	1.5663e-06	0.0010243	3.57993e-08	0.00016507	2.70318e-08	8.12092e-07	5.07491e-08	6.74012e-07	4.67119e-06	2		2	2	2	2	2	2	2
VVSSIEQKTEGAEKK		P63102	14-3-3 protein zeta/delta OS=Rattus norvegicus GN=Ywhaz PE=1 SV=1 - [1433Z_RAT]	1632.88	8.08202e+06	5.3314e+06	6.47825e+07	0	0	0	1.8251e+07	4.98602e+06	0	0	0	34224982	37.01	36.35	36.61				37.99	47.47				42.05	0.000985383	0.00114711	0.00109136				0.000794273	8.8635e-05				0.000343054	3	3	3				3	3
YLAEVAAGDDKK		P63102	14-3-3 protein zeta/delta OS=Rattus norvegicus GN=Ywhaz PE=1 SV=1 - [1433Z_RAT]	1279.65	0	0	1.96163e+07	0	0	0	28886412	1.84877e+06	29826548	1.02535e+07	0	0			52.19	30.24			56.68	47.39	55.02	66.48					2.62718e-05	0.00416344			9.45045e-06	7.93395e-05	1.36927e-05	9.44603e-07					2	2			2	2	2
SKPYLTVDQMMDFINLK		P10687	1-phosphatidylinositol-4,5-bisphosphate phosphodiesterase beta-1 OS=Rattus norvegicus GN=Plcb1 PE=1 SV=1 - [PLCB1_RAT]	2043.03	0	0	6.08781e+07	4.32255e+07	3.12849e+07	2.00098e+07	3.95848e+07	1.62971e+07	2.98753e+07	3.25675e+07	0	0			56.46	54.5	46.5	39.6	55.91	40.05	34.87	57.47					1.78495e-05	2.5724e-05	0.000166785	0.000860735	1.97465e-05	0.000721644	0.00234602	1.42353e-05					3	3	3	3	3	3	3
VVLPSLACLR	C8(Methylthio)	P10687	1-phosphatidylinositol-4,5-bisphosphate phosphodiesterase beta-1 OS=Rattus norvegicus GN=Plcb1 PE=1 SV=1 - [PLCB1_RAT]	1116.63	0	0	0	1.88729e+07	7.86105e+06	1.18461e+07	1.69647e+07	0	18966675	0	12109374	0				48.26	56.64	49.03	48.63		49.61		54.08					5.59798e-05	7.69535e-06	4.43842e-05	4.79809e-05		4.04764e-05		1.38749e-05					2	2	2	2		2
ADFSEEYKR		P13233	2',3'-cyclic-nucleotide 3'-phosphodiesterase OS=Rattus norvegicus GN=Cnp PE=1 SV=2 - [CN37_RAT]	1144.53	0	0	0	2.0001e+07	0	2.69626e+07	4.32992e+07	915695	4.36451e+07	0	1.73708e+07	2.09448e+07				48.7		46.05	37.52	42.57	43.24		52.67	50.05				2.96772e-05		5.46289e-05	0.000389424	0.00011897	0.000104333		1.13558e-05	2.17482e-05				2		2	2	2	2
ADFSEEYKRLDEDLAGYCR	C18(Methylthio)	P13233	2',3'-cyclic-nucleotide 3'-phosphodiesterase OS=Rattus norvegicus GN=Cnp PE=1 SV=2 - [CN37_RAT]	2326.01	0	0	0	1.70468e+08	1.87196e+08	1.80075e+08	0	1.40921e+08	0	0	0	165275882			53.28	49.72	56.95	45.23	46.52	60.4	47.99		52.35	47.81			1.24522e-05	2.82648e-05	4.945e-06	7.19799e-05	5.79393e-05	2.37123e-06	4.13022e-05		1.60078e-05	4.38779e-05			2	3	3	3	2	3	2
AGQVFLEELGNHK		P13233	2',3'-cyclic-nucleotide 3'-phosphodiesterase OS=Rattus norvegicus GN=Cnp PE=1 SV=2 - [CN37_RAT]	1441.74	0	0	0	128549668	0	74302093	1.73376e+08	0	1.82364e+08	0	97351382	122324564			63.4	72.27	48.68	85.54	52.73		71.12		65.87	64.16			2.07975e-06	2.7571e-07	5.6918e-05	1.15891e-08	2.42667e-05		3.6316e-07		9.96462e-07	1.5732e-06			3	2	3	2	2		2
AGQVFLEELGNHKAFKK		P13233	2',3'-cyclic-nucleotide 3'-phosphodiesterase OS=Rattus norvegicus GN=Cnp PE=1 SV=2 - [CN37_RAT]	1916.04	0	0	9.74009e+07	56540793	74594071	0	0	0	44406233	0	0	0			41.3	60.32	41.98				50.09						0.000407721	5.15576e-06	0.000345459				4.6036e-05						3	3	3				3
AHVTLGCAADVQPVQTGLDLLEILQQVK	C7(Methylthio)	P13233	2',3'-cyclic-nucleotide 3'-phosphodiesterase OS=Rattus norvegicus GN=Cnp PE=1 SV=2 - [CN37_RAT]	3005.59	0	0	2.48635e+08	2.84233e+08	2.85724e+08	0	0	1.90128e+08	2.57786e+08	8.48563e+07	3.75355e+08	1.79578e+08			52.65	45.27	60.38			41.74	36.35	75.7	75.61	78.98			3.34099e-05	0.000170871	5.45151e-06			0.000395232	0.00143678	1.58801e-07	1.55256e-07	7.14576e-08			3	3	3			3	3
ATGAEEYAQQDVVR		P13233	2',3'-cyclic-nucleotide 3'-phosphodiesterase OS=Rattus norvegicus GN=Cnp PE=1 SV=2 - [CN37_RAT]	1536.73	0	5372057	0	0	0	0	3.23118e+07	9.60135e+06	0	0	0	0		90.05					38.78	105.97						4.34963e-09					0.000556223	1.12554e-10						2					2	2
DKPELQFPFLQDEDTVATLHECK	C22(Methylthio)	P13233	2',3'-cyclic-nucleotide 3'-phosphodiesterase OS=Rattus norvegicus GN=Cnp PE=1 SV=2 - [CN37_RAT]	2749.28	0	0	0	57856496	0	1.27523e+08	2.0478e+08	4.2983e+07	2.11118e+08	0	90561436	0			51.07	64.53	52.49	59.51	64.67	55.77	74.33	60.61	64.39				4.84609e-05	2.11423e-06	3.41001e-05	6.82857e-06	2.1154e-06	1.60234e-05	2.23231e-07	5.5179e-06	2.05612e-06				4	3	4	3	3	3	3
GGSQGEEVGELPR		P13233	2',3'-cyclic-nucleotide 3'-phosphodiesterase OS=Rattus norvegicus GN=Cnp PE=1 SV=2 - [CN37_RAT]	1314.63	0	3.81297e+07	1.40166e+08	88882286	0	331086594	1.52035e+08	0	1.44839e+08	1.61833e+08	7.34927e+07	8.5472e+07		93.3	95.48	86.8		82.82	72.37		74.62	78.54	64.52	42.73		1.47337e-09	8.77732e-10	6.47682e-09		1.59331e-08	1.79623e-07		1.05269e-07	4.33872e-08	1.09487e-06	0.000165334		2	2	2		2	2		2
GLPGSGKSTLAR		P13233	2',3'-cyclic-nucleotide 3'-phosphodiesterase OS=Rattus norvegicus GN=Cnp PE=1 SV=2 - [CN37_RAT]	1143.65	4.69377e+06	2.32394e+07	1.52414e+08	5.71659e+07	1.51848e+08	1.05144e+08	2.82107e+07	0	59357638	4.92483e+07	4.05411e+07	4.69499e+07	41.69	83.15	73.2	72.09	78.57	76.09	78.75		66.82	65.55	71.22	71.19	0.000338821	2.29982e-08	2.36922e-07	2.93558e-07	6.60227e-08	1.21788e-07	6.60093e-08		1.02945e-06	1.37913e-06	3.73771e-07	3.61155e-07	2	2	2	2	2	2	2		2
HFISGDEPK		P13233	2',3'-cyclic-nucleotide 3'-phosphodiesterase OS=Rattus norvegicus GN=Cnp PE=1 SV=2 - [CN37_RAT]	1029.5	0	0	6.02731e+07	0	4.77538e+07	0	1.60289e+08	0	1.52011e+08	5.18859e+07	4.41966e+07	4.75999e+07			37.97		31.03		34.93		37.43	31.99	30.11	33.69			0.000311196		0.00153828		0.000690937		0.000388542	0.0012332	0.00209623	0.00091926			2		2		2		2
HFISGDEPKEK		P13233	2',3'-cyclic-nucleotide 3'-phosphodiesterase OS=Rattus norvegicus GN=Cnp PE=1 SV=2 - [CN37_RAT]	1286.64	0	0	0	0	0	1.11294e+08	183697430	0	0	1.08936e+08	0	109266755				38.99		35.81	39.37			41.1		37.06				0.000454258		0.000944719	0.0004162			0.000279449		0.000708439				2		3	3
HFISGDEPKEKLDLVSYFGK		P13233	2',3'-cyclic-nucleotide 3'-phosphodiesterase OS=Rattus norvegicus GN=Cnp PE=1 SV=2 - [CN37_RAT]	2309.18	0	0	5.65565e+08	3.14064e+08	2.4095e+08	160335887	241822654	1.42772e+08	259619805	2.51798e+08	0	3.04049e+08			54.81	64.76	50.78	53.17	58.36	67.69	65.79	54.26	36.09	63.46			2.47777e-05	2.75711e-06	6.68482e-05	4.02426e-05	1.2327e-05	1.4213e-06	2.20134e-06	3.11228e-05	0.00204211	3.40367e-06			3	3	3	3	3	3	3
KAGQVFLEELGNHK		P13233	2',3'-cyclic-nucleotide 3'-phosphodiesterase OS=Rattus norvegicus GN=Cnp PE=1 SV=2 - [CN37_RAT]	1569.84	0	0	165128136	0	5.9144e+07	40861368	0	0	0	56418674	0	9.94398e+07			61.37		65.89	42.16			64.87	37.26	58.07	64.69			3.61081e-06		1.33969e-06	0.00031623			1.69435e-06	0.000939658	7.79776e-06	1.6302e-06			3		3	3			2
LDCAQLKEK	C3(Methylthio)	P13233	2',3'-cyclic-nucleotide 3'-phosphodiesterase OS=Rattus norvegicus GN=Cnp PE=1 SV=2 - [CN37_RAT]	1093.54	0	0	0	8.07e+07	4.41195e+07	0	0	0	149124636	0	4.65721e+07	0				36.36	31.94				50.68		46.04					0.00108667	0.00300675				3.59128e-05		0.000116976					2	2				2
LDEDLAGYCR	C9(Methylthio)	P13233	2',3'-cyclic-nucleotide 3'-phosphodiesterase OS=Rattus norvegicus GN=Cnp PE=1 SV=2 - [CN37_RAT]	1200.5	0	0	3.09779e+07	33796260	17908080	0	6.95936e+07	0	6.22317e+07	0	0	0			75.92	59.33	63.86		85.49		61.99						2.55252e-08	1.16405e-06	4.10176e-07		2.81819e-09		6.30914e-07						2	2	2		2		2
LDEDLAGYCRR	C9(Methylthio)	P13233	2',3'-cyclic-nucleotide 3'-phosphodiesterase OS=Rattus norvegicus GN=Cnp PE=1 SV=2 - [CN37_RAT]	1356.61	0	0	0	0	1.24674e+07	0	3.46208e+07	0	0	0	18448081	0					34.82		33.97				34.32						0.000758102		0.00084182				0.000906079						3		3
LDLVSYFGK		P13233	2',3'-cyclic-nucleotide 3'-phosphodiesterase OS=Rattus norvegicus GN=Cnp PE=1 SV=2 - [CN37_RAT]	1041.56	0	0	1.3003e+08	1.13794e+08	2.68306e+07	50486288	2.12532e+08	0	0	63970625	6.18746e+07	7.44975e+07			63.22	63.06	32.31	49.75	63.28			77.15	63.05	77.2			1.11961e-06	1.60651e-06	0.0013806	3.38961e-05	1.40968e-06			4.52968e-08	1.61021e-06	4.47783e-08			2	2	2	2	2
LIVEKYHNGTK	N8(Deamidated)	P13233	2',3'-cyclic-nucleotide 3'-phosphodiesterase OS=Rattus norvegicus GN=Cnp PE=1 SV=2 - [CN37_RAT]	1302.71	2.12489e+07	3.72316e+06	231816782	5.43179e+07	0	0	0	5.5271e+06	0	0	1.12877e+08	0	50.76	56.22	52.89	42.66	54.44	45.73	36	61.18	38.77		54.62		4.82689e-05	1.37299e-05	3.18707e-05	0.000311651	2.06856e-05	0.000163053	0.00149457	4.38195e-06	0.000763252		1.98458e-05		2	2	2	2	3	3	3	2	3
LSISALFVTPK		P13233	2',3'-cyclic-nucleotide 3'-phosphodiesterase OS=Rattus norvegicus GN=Cnp PE=1 SV=2 - [CN37_RAT]	1175.7	0	0	0	2.25548e+07	0	1.11379e+07	39757736	8.27902e+06	3.18342e+07	1.87454e+07	27827796	2.79101e+07				74.44		42.26	58.79	61.23	74.27	61.09	40.49	57.81				5.21637e-08		8.32009e-05	1.91588e-06	1.09237e-06	5.4246e-08	1.12815e-06	0.000129529	2.81481e-06				2		2	2	2	2
MVSADAYK		P13233	2',3'-cyclic-nucleotide 3'-phosphodiesterase OS=Rattus norvegicus GN=Cnp PE=1 SV=2 - [CN37_RAT]	884.418	0	3.1684e+07	1.52071e+08	0	0	8.86679e+07	146828265	4.65458e+06	1.76504e+08	91196408	0	0		50.47	42.73			53.92	50.07	46	46	46.07				1.79486e-05	0.000106667			8.11017e-06	1.96802e-05	5.02377e-05	5.02377e-05	4.94345e-05				2	2			2	2	2	2
RLDEDLAGYCRR	C10(Methylthio)	P13233	2',3'-cyclic-nucleotide 3'-phosphodiesterase OS=Rattus norvegicus GN=Cnp PE=1 SV=2 - [CN37_RAT]	1512.7	0	0	0	117207743	6.64365e+07	6.43303e+07	1.33423e+08	1.67788e+07	1.20655e+08	63294392	1.06867e+08	77266902				35.23	39.57	32.62	35.84	37.73	39.03	37.43	61.51	46.5				0.00122966	0.000458193	0.00188721	0.000951246	0.000632457	0.000431339	0.000659619	2.82527e-06	8.95488e-05				3	3	3	3	3	3
RPPGVLHCTTK	C8(Methylthio)	P13233	2',3'-cyclic-nucleotide 3'-phosphodiesterase OS=Rattus norvegicus GN=Cnp PE=1 SV=2 - [CN37_RAT]	1254.64	4.55041e+07	0	856010787	3.70297e+08	2.08114e+08	217774917	354090690	0	4.39185e+08	2.37641e+08	1.31348e+08	0	40.99		39.71	36.75	32.58	35.69	40.57		37.04	37.69	36.52		0.000342349		0.000406241	0.0009088	0.00237393	0.00113305	0.00037711		0.000850097	0.000731928	0.000935943		3		3	3	3	3	3		3
VLVLDDTNHER		P13233	2',3'-cyclic-nucleotide 3'-phosphodiesterase OS=Rattus norvegicus GN=Cnp PE=1 SV=2 - [CN37_RAT]	1310.67	0	0	0	4.66356e+07	3.72977e+07	4.52641e+07	9.19956e+07	0	8.07864e+07	0	0	0			49.93	33.7	50.09	46.13	64.49		50.78			58.12			3.76012e-05	0.00170632	3.62411e-05	9.75124e-05	1.42253e-06		3.09173e-05			5.70429e-06			3	2	2	2	2		2
VLVLDDTNHERER		P13233	2',3'-cyclic-nucleotide 3'-phosphodiesterase OS=Rattus norvegicus GN=Cnp PE=1 SV=2 - [CN37_RAT]	1595.81	0	0	0	1.27466e+08	0	0	0	1.97165e+07	0	1.01451e+08	1.16757e+08	0			31.52	49.43	35.13			51.49	31.88	43.44	52.05				0.00380534	6.15735e-05	0.00165727			3.83172e-05	0.00347019	0.000244565	3.36817e-05				2	3	2			3	2
AKPVWYAGRDPAAAPATGNK		Q5XI78	2-oxoglutarate dehydrogenase, mitochondrial OS=Rattus norvegicus GN=Ogdh PE=1 SV=1 - [ODO1_RAT]	2041.06	0	0	395920918	2.01629e+08	214625463	168432356	203638056	0	139092165	0	177639932	164279182			50.41	40.21	42.08	32.22	44.14		44.11		39.3	41.01			5.91444e-05	0.000652665	0.000408831	0.00389864	0.000250561		0.000256179		0.000769558	0.000523051			3	3	3	3	3		3
FLDTAFDLDAFK		Q5XI78	2-oxoglutarate dehydrogenase, mitochondrial OS=Rattus norvegicus GN=Ogdh PE=1 SV=1 - [ODO1_RAT]	1402.69	0	0	2.06009e+08	1.16085e+08	130704670	78622068	133229917	1.85485e+07	1.13599e+08	79356773	97597325	1.08513e+08			53.36	43.91	54.82	36.58	45.95	34.87	63.88	55.42	68.45	51.74			2.23739e-05	0.000162577	1.31844e-05	0.00106596	0.00010418	0.00141739	1.65751e-06	1.17702e-05	6.93014e-07	3.24894e-05			2	2	2	2	2	2	2
FLDTAFDLDAFKK		Q5XI78	2-oxoglutarate dehydrogenase, mitochondrial OS=Rattus norvegicus GN=Ogdh PE=1 SV=1 - [ODO1_RAT]	1530.78	0	0	0	0	3.75723e+08	381364172	0	8.82154e+07	478143229	3.18844e+08	0	3.78699e+08	47.04		54.61	69.11	64.32	58.59	46.2	60.7	49.1	47.55	64.69	56.63	0.000124549		2.2659e-05	7.73287e-07	2.32992e-06	8.71647e-06	0.00014393	5.70262e-06	7.75069e-05	0.000119539	2.05473e-06	1.31448e-05	3		3	3	2	2	3	2	2
FLDTAFDLDAFKKFS		Q5XI78	2-oxoglutarate dehydrogenase, mitochondrial OS=Rattus norvegicus GN=Ogdh PE=1 SV=1 - [ODO1_RAT]	1764.88	0	0	1.06997e+07	0	3.11452e+07	1.10499e+07	0	1.55656e+07	0	0	0	0			54.45		47.99	37.84		45.29							2.42272e-05		0.000111198	0.00115106		0.000205582							3		3	3		3
HHVLHDQNVDKR		Q5XI78	2-oxoglutarate dehydrogenase, mitochondrial OS=Rattus norvegicus GN=Ogdh PE=1 SV=1 - [ODO1_RAT]	1497.77	1.24725e+06	0	0	2.43085e+07	0	4.27216e+07	0	0	2.4838e+07	0	0	0	54.52			61.28	56.96	54.87	57.16		61.38	50.53		56.81	1.58932e-05			3.31406e-06	8.86039e-06	1.44997e-05	8.65391e-06		3.23862e-06	3.98302e-05		9.38021e-06	3			3	4	3	4		3
HWLDSPWPGFFTLDGQPR		Q5XI78	2-oxoglutarate dehydrogenase, mitochondrial OS=Rattus norvegicus GN=Ogdh PE=1 SV=1 - [ODO1_RAT]	2156.03	0	0	49882530	7.58189e+07	5.89475e+07	1.7669e+07	5.13482e+07	0	0	1.76852e+07	0	1.24842e+08			68.08	62.88	62.66	64.79	61.35		72.35	65.23	65.59	73.32			9.33579e-07	3.09137e-06	3.25201e-06	2.15731e-06	4.87328e-06		3.57993e-07	1.84448e-06	1.76677e-06	2.86335e-07			3	3	3	3	3		2
ICEEAFTR	C2(Methylthio)	Q5XI78	2-oxoglutarate dehydrogenase, mitochondrial OS=Rattus norvegicus GN=Ogdh PE=1 SV=1 - [ODO1_RAT]	1014.44	0	0	0	0	0	2.57514e+07	6.69318e+07	0	5.62146e+07	0	3.67957e+07	0						39.97	45.7		42.48		40.25							0.000100455	2.68516e-05		5.63599e-05		9.41825e-05							2	2		2
IEQLSPFPFDLLLK		Q5XI78	2-oxoglutarate dehydrogenase, mitochondrial OS=Rattus norvegicus GN=Ogdh PE=1 SV=1 - [ODO1_RAT]	1659.93	0	0	1.87207e+08	0	44122236	0	0	0	316318548	67118550	2.02492e+08	0			32.62		40.38				31.75	30.84	31.27				0.00128549		0.000233636				0.00180453	0.00230759	0.0018288				2		2				2
KTHLTELQR		Q5XI78	2-oxoglutarate dehydrogenase, mitochondrial OS=Rattus norvegicus GN=Ogdh PE=1 SV=1 - [ODO1_RAT]	1125.64	0	0	0	3.11295e+07	0	3.69884e+07	3.61516e+07	1.4118e+06	6.02657e+07	0	0	3.22744e+07				31.87	34.41	39.56	44.38	40.08	37.92		53.63	36.18				0.0014953	0.000833159	0.000254523	8.38934e-05	0.000225802	0.000242154		9.97075e-06	0.00051813				2	3	2	2	2	2
LLFCTGK	C4(Methylthio)	Q5XI78	2-oxoglutarate dehydrogenase, mitochondrial OS=Rattus norvegicus GN=Ogdh PE=1 SV=1 - [ODO1_RAT]	827.415	0	0	38096235	4.93809e+07	28860216	2.88686e+07	42371641	0	0	3.01374e+07	3.39773e+07	2.63359e+07			42.18	42.16	40.68	37.77	39.17			40.63	39.91	37.83			7.26409e-05	7.29762e-05	0.000102608	0.000200531	0.000145272			0.000103796	0.000122513	0.000230743			2	2	2	2	2
NTNAGAPPGTAYQSPLSLSR		Q5XI78	2-oxoglutarate dehydrogenase, mitochondrial OS=Rattus norvegicus GN=Ogdh PE=1 SV=1 - [ODO1_RAT]	2002	0	0	8.28182e+07	8.43655e+07	6.47126e+07	6.27384e+07	130389898	0	1.21341e+08	4.8456e+07	7.45149e+07	45550750	63.93	60.17	91.79	66.54	95.51	65.71	57.92		73.08	83.86	56.85	94.44	2.42746e-06	6.34664e-06	4.13885e-09	1.46401e-06	1.81368e-09	1.61121e-06	1.03319e-05		2.90303e-07	2.63136e-08	1.32184e-05	2.32038e-09	2	2	2	2	2	2	2		2
SLLRHPEAR		Q5XI78	2-oxoglutarate dehydrogenase, mitochondrial OS=Rattus norvegicus GN=Ogdh PE=1 SV=1 - [ODO1_RAT]	1078.61	7.75142e+06	0	3.82263e+08	1.25944e+08	0	1.73676e+08	1.8423e+08	4.33783e+06	0	0	97830544	1.03487e+08	31.21		34.74	30.33		30.15	34.73	34.26			32.87	33.66	0.00155151		0.00075541	0.00203903		0.00217361	0.000740325	0.000843689			0.00113612	0.000818001	3		3	3		3	3	3
SSPYPTDVAR		Q5XI78	2-oxoglutarate dehydrogenase, mitochondrial OS=Rattus norvegicus GN=Ogdh PE=1 SV=1 - [ODO1_RAT]	1092.53	0	6.6011e+07	0	2.02336e+08	2.30725e+08	240523177	0	0	2.91084e+08	1.522e+08	1.20884e+08	1.2298e+08		72.11		71.74	71.37	71.76			71.53	71.69	59.76	71.66		2.67602e-07		2.51207e-07	2.80841e-07	2.50053e-07			2.63652e-07	2.54116e-07	4.33295e-06	2.55877e-07		2		2	2	2			2
TSFDEMLPGTHFQR		Q5XI78	2-oxoglutarate dehydrogenase, mitochondrial OS=Rattus norvegicus GN=Ogdh PE=1 SV=1 - [ODO1_RAT]	1665.77	0	0	3.83654e+08	3.45401e+08	2.63281e+08	2.98436e+08	316296000	0	3.15595e+08	2.40667e+08	1.62228e+08	2.13174e+08			69.52	60.54	68.03	72.82	70.07		69.3	66.49	67.11	62.48			3.68565e-07	3.2674e-06	5.74504e-07	1.80227e-07	3.59164e-07		4.34712e-07	8.63895e-07	7.2951e-07	2.06202e-06			2	2	2	2	2		2
VIPEDGPAAQNPDKVKR		Q5XI78	2-oxoglutarate dehydrogenase, mitochondrial OS=Rattus norvegicus GN=Ogdh PE=1 SV=1 - [ODO1_RAT]	1833.98	0	0	81591855	1.06701e+08	0	0	90300943	0	1.30918e+08	7.26597e+07	55369294	71551161			76.93	71.12	87.06		76.53		72.55	80.35	74.14	79.76			1.0544e-07	4.17248e-07	1.15121e-08		1.20059e-07		2.75173e-07	4.98189e-08	2.19723e-07	5.70681e-08			3	3	2		3		3
VYYDLTR		Q5XI78	2-oxoglutarate dehydrogenase, mitochondrial OS=Rattus norvegicus GN=Ogdh PE=1 SV=1 - [ODO1_RAT]	929.472	0	1.09566e+07	0	0	0	0	4.64728e+07	0	5.64184e+07	0	0	38776033		36.98			39.28		39.66		35.37			30.41		0.000410917			0.000241966		0.000221694		0.000580805			0.00186532		2			2		2		2
AVAENQPFLIEAMTYR		P11960	2-oxoisovalerate dehydrogenase subunit alpha, mitochondrial (Fragment) OS=Rattus norvegicus GN=Bckdha PE=1 SV=1 - [ODBA_RAT]	1852.92	0	0	4.37734e+07	0	2.88035e+07	0	3.8078e+07	0	2.94779e+07	0	2.27167e+07	0			68.53		74.34		67.98		44.48		80.27				1.03107e-06		2.54009e-07		1.09862e-06		0.000228129		6.71902e-08				2		2		2		2
KLKPNPSLLFSDVYQEMPAQLRR		P11960	2-oxoisovalerate dehydrogenase subunit alpha, mitochondrial (Fragment) OS=Rattus norvegicus GN=Bckdha PE=1 SV=1 - [ODBA_RAT]	2730.48	0	0	79655500	0	28981021	0	0	0	0	7.40349e+07	63158208	78192419			40.36	59.3	39.81					47.01	42.36	43.64			0.000349771	4.5821e-06	0.000396994					8.26129e-05	0.000191652	0.000177331			4	3	4
GGIVGMTLPIAR		O70351	3-hydroxyacyl-CoA dehydrogenase type-2 OS=Rattus norvegicus GN=Hsd17b10 PE=1 SV=3 - [HCD2_RAT]	1184.68	0	0	51960717	0	0	0	6.52584e+07	0	59173501	2.4179e+07	0	0			61.96				68.5		63.5	68.89					2.06959e-06				4.732e-07		1.09437e-06	4.32558e-07					2				2		2
GLVAVITGGASGLGLSTAKR		O70351	3-hydroxyacyl-CoA dehydrogenase type-2 OS=Rattus norvegicus GN=Hsd17b10 PE=1 SV=3 - [HCD2_RAT]	1828.07	0	0	0	0	2.0538e+07	0	15958631	0	0	1.6063e+07	0	2.94203e+07					82.47		108.08			103.86		64.56					9.34295e-09		2.48955e-11			6.5784e-11		5.59912e-07					2		2
LVGQGATAVLLDVPNSEGETEAK		O70351	3-hydroxyacyl-CoA dehydrogenase type-2 OS=Rattus norvegicus GN=Hsd17b10 PE=1 SV=3 - [HCD2_RAT]	2298.18	0	0	2.72465e+07	0	2.37355e+07	0	0	0	22183902	1.79385e+07	0	0			37.77		42				38.78	38.94					0.00119483		0.000429051				0.000913796	0.000944565					2		2				2
VVTIAPGLFATPLLTTLPDKVR		O70351	3-hydroxyacyl-CoA dehydrogenase type-2 OS=Rattus norvegicus GN=Hsd17b10 PE=1 SV=3 - [HCD2_RAT]	2322.38	0	0	0	5.39394e+07	0	0	0	0	0	7.17328e+06	4.7501e+07	0			42.49	85.83		72.24			74.43	98.62	77.14				5.62302e-05	2.60597e-09		5.95621e-08			3.59724e-08	1.37079e-10	1.92739e-08				3	2		3			3
DLGLAQDSATSTKTPILLGSVAHQIYR		P29266	3-hydroxyisobutyrate dehydrogenase, mitochondrial OS=Rattus norvegicus GN=Hibadh PE=1 SV=3 - [3HIDH_RAT]	2855.52	1.32642e+07	0	1.03055e+08	37754127	0	0	41259179	0	4.33037e+07	4.50896e+07	0	0	55.39		82.51	57.42			75.41	56.17	74.69	57.19			1.38753e-05		2.69303e-08	8.5133e-06			1.33799e-07	1.13527e-05	1.68115e-07	8.97631e-06			3		3	3			3	3	3
MGAVFMDAPVSGGVGAAR		P29266	3-hydroxyisobutyrate dehydrogenase, mitochondrial OS=Rattus norvegicus GN=Hibadh PE=1 SV=3 - [3HIDH_RAT]	1692.82	6.98214e+07	0	6.68661e+07	82800213	1.02339e+08	85822795	0	0	82557206	66820242	0	0	67.65		68.77	57.18	73.14	68.24			57.13	60.86			1.09946e-06		7.36704e-07	9.85842e-06	2.66909e-07	8.32325e-07			9.39165e-06	4.4299e-06			2		2	2	2	2			2
TPILLGSVAHQIYR		P29266	3-hydroxyisobutyrate dehydrogenase, mitochondrial OS=Rattus norvegicus GN=Hibadh PE=1 SV=3 - [3HIDH_RAT]	1567.9	0	0	3.49598e+07	1.93348e+07	0	0	25493690	0	3.33206e+07	1.82303e+07	24519474	23442797			71.8	63.61			55.07		90.13	65.14	50.72	70.21			1.42049e-07	7.4037e-07			5.13433e-06		1.55282e-09	5.20534e-07	1.39793e-05	1.57211e-07			2	2			2		2
TPVGFIGLGNMGNPMAK		P29266	3-hydroxyisobutyrate dehydrogenase, mitochondrial OS=Rattus norvegicus GN=Hibadh PE=1 SV=3 - [3HIDH_RAT]	1703.86	0	0	0	0	0	0	57365293	0	5.59033e+07	0	3.66116e+07	0							46.04		47.89		53.59								0.000200353		0.000130857		2.99703e-05								2		2
GGFKDTTPDELLSAVLTAVLQDVK		P21775	3-ketoacyl-CoA thiolase A, peroxisomal OS=Rattus norvegicus GN=Acaa1a PE=2 SV=2 - [THIKA_RAT]	2517.34	0	0	0	1.5724e+07	2.39807e+07	9.39317e+06	0	0	1.58791e+07	1.23539e+07	12292104	0				53.09	68.38	63.64			74.33	71.2	75.66					2.99454e-05	7.55098e-07	2.46533e-06			1.88179e-07	4.09632e-07	1.71136e-07					3	3	3			3
IAQFLSGIPETVPLSAVNR		P21775	3-ketoacyl-CoA thiolase A, peroxisomal OS=Rattus norvegicus GN=Acaa1a PE=2 SV=2 - [THIKA_RAT]	2012.11	0	0	3.86714e+07	0	3.59231e+07	2.96766e+07	0	0	0	2.99256e+07	3.50416e+07	2.96069e+07			48		47.59	66.93				53.9	30.91	31.33			5.46788e-05		6.61887e-05	8.41488e-07				1.54805e-05	0.00308165	0.00246629			2		2	2
FGLDLKLEDTLWAGLTDQHVK		P13437	3-ketoacyl-CoA thiolase, mitochondrial OS=Rattus norvegicus GN=Acaa2 PE=1 SV=1 - [THIM_RAT]	2399.26	0	0	0	4.65135e+07	24058395	0	0	0	0	0	4.55125e+07	3.34134e+07				72.5	66.22						70.17	76.11				3.99262e-07	1.7431e-06						6.87553e-07	1.67761e-07				3	3
HNFTPLAR		P13437	3-ketoacyl-CoA thiolase, mitochondrial OS=Rattus norvegicus GN=Acaa2 PE=1 SV=1 - [THIM_RAT]	955.511	0	0	0	0	3.04552e+07	2.48209e+07	0	0	4.24579e+07	0	2.26093e+07	0					36.09	30.7			32.78		30.77						0.000258339	0.00144693			0.000553591		0.000879406						2	2			2
LPMGMTAENLAAK		P13437	3-ketoacyl-CoA thiolase, mitochondrial OS=Rattus norvegicus GN=Acaa2 PE=1 SV=1 - [THIM_RAT]	1346.68	0	0	1.00938e+08	1.01689e+08	76766681	0	0	0	1.24936e+08	0	0	0			61.34	59.43	40.19				72.36						3.48894e-06	5.35917e-06	0.000550387				2.72959e-07						2	2	2				2
SLDLDPSKTNVSGGAIALGHPLGGSGSR		P13437	3-ketoacyl-CoA thiolase, mitochondrial OS=Rattus norvegicus GN=Acaa2 PE=1 SV=1 - [THIM_RAT]	2663.37	0	0	1.0979e+08	0	75730593	0	0	1.48225e+07	6.84271e+07	5.67852e+07	7.31623e+07	7.74324e+07			64.57	65.39	45.1			49.66	41.43	55.41	63.11	56.41			2.56618e-06	1.79222e-06	0.000190053			7.08339e-05	0.000442461	1.82715e-05	2.93191e-06	1.35993e-05			3	3	3			3	3
VGVPTETGALTLNR		P13437	3-ketoacyl-CoA thiolase, mitochondrial OS=Rattus norvegicus GN=Acaa2 PE=1 SV=1 - [THIM_RAT]	1427.78	0	7.94727e+06	94885712	0	60166025	7.55675e+07	9.08594e+07	0	0	50025941	7.29541e+07	5.46334e+07		73.77	77.48		84.58	72.97	86.16			79.32	85.24	77.29		1.5741e-07	7.50325e-08		1.35852e-08	1.89248e-07	9.19991e-09			4.4441e-08	1.13706e-08	6.99892e-08		2	2		2	2	2
ALVSAQWVAEALK		P97532	3-mercaptopyruvate sulfurtransferase OS=Rattus norvegicus GN=Mpst PE=1 SV=3 - [THTM_RAT]	1385.78	0	0	0	0	0	7.47421e+06	28074882	9.87655e+06	0	0	0	0						31.85	58.19	55.97										0.00241658	7.20599e-06	1.22671e-05										2	2	2
ALVSAQWVAEALKSPR		P97532	3-mercaptopyruvate sulfurtransferase OS=Rattus norvegicus GN=Mpst PE=1 SV=3 - [THTM_RAT]	1725.97	0	0	0	0	1.85567e+07	0	0	2.14279e+07	0	0	1.91249e+07	25446834			57.26	54.9	100.57	51.62		108.66		44.54	129.23	92.01			6.57761e-06	9.70781e-06	2.8941e-10	2.23812e-05		4.76506e-11		0.000123046	3.70136e-13	2.20327e-09			3	3	2	3		2
AQPEHVISQGR		P97532	3-mercaptopyruvate sulfurtransferase OS=Rattus norvegicus GN=Mpst PE=1 SV=3 - [THTM_RAT]	1221.63	7.29407e+06	1.00759e+07	5.8764e+07	2.71394e+07	0	0	3.05599e+07	0	63225443	2.98432e+07	0	2.83001e+07	34.3	39.43	43.95	41.52			44.28		38.18	52.61		55.25	0.00189483	0.000564424	0.000199345	0.000359393			0.000184759		0.000775479	2.79621e-05		1.47776e-05	2	2	2	2			2		2
ASQPLKLLDASWYLPK		P97532	3-mercaptopyruvate sulfurtransferase OS=Rattus norvegicus GN=Mpst PE=1 SV=3 - [THTM_RAT]	1830.02	0	0	0	1.38319e+07	1.61183e+07	1.27449e+07	0	0	0	1.14552e+07	0	0				49.09	51.45	45.73				69.7						4.74745e-05	2.68554e-05	0.000104247				4.12535e-07						3	3	3
FQVVDAR		P97532	3-mercaptopyruvate sulfurtransferase OS=Rattus norvegicus GN=Mpst PE=1 SV=3 - [THTM_RAT]	834.446	0	6.0865e+06	0	0	1.62075e+07	0	1.46674e+07	0	0	0	0	0		42.62			56		40.34							0.000194191			8.9172e-06		0.000328268							2			2		2
AIHKIDIPSFDWPIAPFPR		P50554	4-aminobutyrate aminotransferase, mitochondrial OS=Rattus norvegicus GN=Abat PE=1 SV=3 - [GABT_RAT]	2220.2	0	0	1819591541	1.65236e+08	0	33519400	1.39128e+08	0	64504339	0	0	0			39.24	36.22	47.32	34.27	39.43		33.95	43.2	53.67	44.09			0.00061349	0.00115809	9.0823e-05	0.00175832	0.000604332		0.00207399	0.000253674	2.12621e-05	0.00020277			4	4	3	4	4		4
CLEEVEDLIVK	C1(Methylthio)	P50554	4-aminobutyrate aminotransferase, mitochondrial OS=Rattus norvegicus GN=Abat PE=1 SV=3 - [GABT_RAT]	1335.66	0	0	8.61331e+07	62334964	0	8.87212e+07	1.33997e+08	0	9.5424e+07	5.85379e+07	49685740	7.31971e+07			39.04	46.05		49.88	45.04		34.84	36.74	33.14	34.29			0.000548849	0.000124157		5.14008e-05	0.000158231		0.00164048	0.00105918	0.00242644	0.00195506			2	2		2	2		2
FWAHEHWGLDDPADVMSFSK		P50554	4-aminobutyrate aminotransferase, mitochondrial OS=Rattus norvegicus GN=Abat PE=1 SV=3 - [GABT_RAT]	2375.06	0	0	7.23551e+07	0	0	2.04223e+07	0	2.78372e+07	0	23153723	3.60915e+07	0			53.92			58.1		66.6		41.48	81.18				1.35845e-05			5.26598e-06		7.65717e-07		0.000245369	2.70538e-08				3			3		3
FWAHEHWGLDDPADVMSFSKK		P50554	4-aminobutyrate aminotransferase, mitochondrial OS=Rattus norvegicus GN=Abat PE=1 SV=3 - [GABT_RAT]	2503.15	0	0	0	0	0	0	6.57589e+07	2.20916e+07	3.96669e+07	2.72965e+07	0	72251879			57.24	47.1			35.42	40.06	33.96	39.39		36.76			9.81756e-06	0.000101392			0.00153587	0.000532591	0.00216967	0.000592662		0.00112812			3	3			4	4	4
IDIPSFDWPIAPFPR		P50554	4-aminobutyrate aminotransferase, mitochondrial OS=Rattus norvegicus GN=Abat PE=1 SV=3 - [GABT_RAT]	1770.92	0	0	0	4.2466e+07	0	0	0	0	0	3.43291e+07	4.23204e+07	0				44.39						64.37	68.13					0.000211071						2.06561e-06	8.84439e-07					2
LKYPLEEFVTDNQQEEAR		P50554	4-aminobutyrate aminotransferase, mitochondrial OS=Rattus norvegicus GN=Abat PE=1 SV=3 - [GABT_RAT]	2209.08	0	0	4.22925e+07	4.04107e+07	8.68921e+06	72596044	0	0	17973512	2.89393e+07	0	0	69.99		89.72	91.4	75.04	75.78	71.01	35.15	83.75	83.72	60.21		7.66764e-07		7.99947e-09	5.50571e-09	2.49096e-07	2.11393e-07	6.10226e-07	0.00232174	3.09947e-08	3.05726e-08	6.76485e-06		3		2	2	2	2	2	3	2
MLDLYSQISSVPIGYNHPALAK		P50554	4-aminobutyrate aminotransferase, mitochondrial OS=Rattus norvegicus GN=Abat PE=1 SV=3 - [GABT_RAT]	2417.26	0	0	0	553765152	0	3.41523e+08	5.63266e+08	1.69922e+08	5.35808e+08	469873202	5.11741e+08	491366280				55.25		36.78	54.36	66.51	64.11	54.36	66.76	60.22				2.1644e-05		0.00149025	2.60171e-05	1.73102e-06	2.77528e-06	2.60171e-05	1.51821e-06	7.08201e-06				3		3	3	3	3
NKGVVLGGCGDK	C9(Methylthio)	P50554	4-aminobutyrate aminotransferase, mitochondrial OS=Rattus norvegicus GN=Abat PE=1 SV=3 - [GABT_RAT]	1192.58	0	2.75212e+06	8.99372e+07	3.74812e+07	0	27849206	61541952	0	5.43665e+07	0	0	0		65.18	65.07	55.82		87.33	53.36		30.39					1.62313e-06	1.66477e-06	1.40073e-05		9.43127e-09	2.28352e-05		0.00489051					2	2	2		2	2		2
TEVPGPR		P50554	4-aminobutyrate aminotransferase, mitochondrial OS=Rattus norvegicus GN=Abat PE=1 SV=3 - [GABT_RAT]	755.405	0	2.24069e+07	0	81676613	1.318e+08	2.41843e+08	0	2.37839e+06	1.89354e+08	0	8.30877e+07	0		40.62		41.08	45.8	42.78		54.14	45.79		30.76			9.53658e-05		8.57813e-05	2.89329e-05	5.79953e-05		4.24026e-06	2.89996e-05		0.000923406			2		2	2	2		2	2
TMGCLATTHSK	C4(Methylthio)	P50554	4-aminobutyrate aminotransferase, mitochondrial OS=Rattus norvegicus GN=Abat PE=1 SV=3 - [GABT_RAT]	1195.53	0	5.07843e+06	0	0	0	3.6609e+07	45655314	0	0	0	41383402	4.57289e+07		33.8				45.59	47.43				44.86	30.17		0.000771208				5.10707e-05	3.34327e-05				8.0014e-05	0.00182706		2				2	2
TVAGIIVEPIQSEGGDNHASDDFFR		P50554	4-aminobutyrate aminotransferase, mitochondrial OS=Rattus norvegicus GN=Abat PE=1 SV=3 - [GABT_RAT]	2674.27	0	0	5.31092e+07	0	0	0	6.1682e+07	0	6.00046e+07	0	3.75151e+07	0	65.97		30.5				76.74		49.07		33.63		1.74522e-06		0.00628332				1.49344e-07		8.67158e-05		0.00303458		3		3				3		3
VDFEFDYDGPLMK		P50554	4-aminobutyrate aminotransferase, mitochondrial OS=Rattus norvegicus GN=Abat PE=1 SV=3 - [GABT_RAT]	1575.7	0	0	1.61585e+08	1.44658e+08	0	1.56213e+08	2.06652e+08	0	0	125202441	108883988	1.02338e+08			42.34	40.17		47.2	35.54			33.42	36.46	35.48			0.000119606	0.000206747		4.00147e-05	0.000600397			0.00102372	0.00044059	0.000622906			2	2		2	2
GIAGLKNHLEYLSTLK		Q794F9	4F2 cell-surface antigen heavy chain OS=Rattus norvegicus GN=Slc3a2 PE=1 SV=1 - [4F2_RAT]	1757	0	0	108236251	72231349	0	0	0	0	7.56129e+07	4.38212e+07	0	5.3196e+07			65.72	65.26					69.47	68.25		65.68			1.15204e-06	9.97803e-07					3.61535e-07	4.86277e-07		9.19346e-07			3	3					3
GQNEDPGSLLTQFRR		Q794F9	4F2 cell-surface antigen heavy chain OS=Rattus norvegicus GN=Slc3a2 PE=1 SV=1 - [4F2_RAT]	1717.87	0	0	0	9.88114e+07	1.1567e+08	0	1.01013e+08	0	109583630	0	7.91688e+07	61224388				34.37	48.74		42.44		40.77		40.98	40.68				0.00223013	8.62104e-05		0.000344949		0.000561145		0.000554606	0.000560069				3	3		3		3
IGDLQAFVGPEAR		Q794F9	4F2 cell-surface antigen heavy chain OS=Rattus norvegicus GN=Slc3a2 PE=1 SV=1 - [4F2_RAT]	1372.72	0	0	1.47283e+08	1.22913e+08	0	0	145049901	0	0	0	1.03903e+08	0			98.74	88.11			93.83				89.95				6.14834e-10	6.79912e-09			2.1114e-09				5.00732e-09				2	2			2
IKVAEDEAEAGVK		Q794F9	4F2 cell-surface antigen heavy chain OS=Rattus norvegicus GN=Slc3a2 PE=1 SV=1 - [4F2_RAT]	1358.72	0	0	0	0	0	0	0	0	0	1.01112e+07	0	0				40.01						56.05	44.67	65.85				0.000638528						1.16707e-05	0.000156949	1.15707e-06				2
SLLHGDFDALSSSSGLFSYVR		Q794F9	4F2 cell-surface antigen heavy chain OS=Rattus norvegicus GN=Slc3a2 PE=1 SV=1 - [4F2_RAT]	2258.11	0	0	0	0	1.71955e+07	0	0	4.7457e+07	1.96143e+07	0	0	0			58.29		52.93		66.24	77.73	71.68			82.4			1.21566e-05		4.27838e-05		1.97278e-06	1.39984e-07	5.56947e-07			4.77615e-08			3		3		2	3	3
VGASNLPAGISLPASANLLLSTDSTR		Q794F9	4F2 cell-surface antigen heavy chain OS=Rattus norvegicus GN=Slc3a2 PE=1 SV=1 - [4F2_RAT]	2525.36	0	0	0	0	80488087	4.73795e+07	8.79547e+07	0	9.26222e+07	52388088	9.42162e+07	7.86096e+07					39.64	39.18	44.84		36.37	44.71	50.12	35.28					0.000467163	0.000525399	0.000142721		0.000968834	0.000143678	4.32873e-05	0.0012897					2	2	2		2
IKIGDPLLEDTR		Q9JLJ3	4-trimethylaminobutyraldehyde dehydrogenase OS=Rattus norvegicus GN=Aldh9a1 PE=1 SV=1 - [AL9A1_RAT]	1369.77	0	0	3.54693e+07	3.86837e+07	0	0	0	0	5.00265e+07	2.68168e+07	0	0			59.91	47.45					67.25	40.31					3.06282e-06	6.02622e-05					5.65095e-07	0.000321232					2	2					2
MGPLINAPHLER		Q9JLJ3	4-trimethylaminobutyraldehyde dehydrogenase OS=Rattus norvegicus GN=Aldh9a1 PE=1 SV=1 - [AL9A1_RAT]	1347.72	8700563	0	0	0	0	4.8452e+07	1.14485e+08	0	86496844	3.87197e+07	0	5.10117e+07	39.31		43.8		46.89	57.22	62.81		79.79	55.33	48.7	65.82	0.000750205		0.000237616		0.000119717	1.08112e-05	2.98452e-06		6.71707e-08	1.84646e-05	7.62164e-05	1.728e-06	2		3		3	2	2		2
STGTFVVSQPLNYR		Q9JLJ3	4-trimethylaminobutyraldehyde dehydrogenase OS=Rattus norvegicus GN=Aldh9a1 PE=1 SV=1 - [AL9A1_RAT]	1568.8	0	0	0	22375612	29634048	0	0	0	1.80781e+07	0	2.52949e+07	0				45.66	48.84				40.75		33.65	39.35				0.000112732	6.79209e-05				0.0003618		0.0017045	0.000528459				2	2				2
AAVEEGIVLGGGCALLR	C13(Methylthio)	P63039	60 kDa heat shock protein, mitochondrial OS=Rattus norvegicus GN=Hspd1 PE=1 SV=1 - [CH60_RAT]	1673.87	1.93173e+07	0	8.81471e+07	1.18247e+08	1.83637e+08	2.05554e+08	65197498	3.05331e+08	59998742	121300810	1.19783e+08	122785878	40.4		66.72	59.9	63.48	56.5	72.59	69.66	48.85	65.37	72.18	76.31	0.000629287		1.4897e-06	7.06072e-06	3.18609e-06	1.54472e-05	3.85565e-07	7.57004e-07	9.12217e-05	2.00378e-06	4.17685e-07	1.59041e-07	2		2	2	2	2	2	2	2
ALKIPAMTIAK		P63039	60 kDa heat shock protein, mitochondrial OS=Rattus norvegicus GN=Hspd1 PE=1 SV=1 - [CH60_RAT]	1156.71	2.87483e+07	0	9.8009e+08	375779623	0	160378416	146074360	0	0	267654416	1.36275e+08	0	31.83	50.67	47.98	47.83		58.15	65.14		30.03	65.43	47.76		0.00111545	2.09974e-05	1.91065e-05	2.30743e-05		3.5215e-06	7.04252e-07		0.0016883	7.01724e-07	4.10361e-05		3	2	3	3		3	3		2
ALKIPAMTIAK	M7(Oxidation)	P63039	60 kDa heat shock protein, mitochondrial OS=Rattus norvegicus GN=Hspd1 PE=1 SV=1 - [CH60_RAT]	1172.71	6.60999e+06	0	8.95136e+07	34528681	187213180	1.40804e+08	4.44937e+07	0	3.08925e+07	0	1.27643e+08	49787998	46.46		52.53	51.28	58.45	53.55	51.88		54.48		53.25	52.45	7.79505e-05		1.8988e-05	1.97354e-05	4.85824e-06	1.50134e-05	2.20536e-05		1.28322e-05		8.28015e-06	1.9341e-05	3		3	3	3	3	3		3
ALMLQGVDLLADAVAVTMGPK	M18(Oxidation)	P63039	60 kDa heat shock protein, mitochondrial OS=Rattus norvegicus GN=Hspd1 PE=1 SV=1 - [CH60_RAT]	2129.13	0	0	0	5.95686e+07	7.30049e+07	0	0	6.15588e+07	2.84233e+07	0	1.69315e+07	1.37163e+07			66.87	42.75	76.07		33.48	74.93	97.44	50.28	54.51	59.63			1.1513e-06	0.000281369	1.33473e-07		0.00233348	1.73538e-07	9.64614e-10	5.15659e-05	1.96469e-05	5.66244e-06			2	3	3		2	3	3
ALMLQGVDLLADAVAVTMGPK		P63039	60 kDa heat shock protein, mitochondrial OS=Rattus norvegicus GN=Hspd1 PE=1 SV=1 - [CH60_RAT]	2113.14	0	0	1.91869e+08	3.65477e+08	1.16757e+09	4.46007e+08	1.156e+09	6.83413e+08	5.12405e+08	3.6546e+08	5.34425e+08	683873369			97.47	94.71	83.32	102.59	97.09	92.3	83.46	85.83	96.3	86.13			9.7588e-10	1.91007e-09	2.56072e-08	3.11206e-10	1.1042e-09	3.32697e-09	2.54711e-08	1.51505e-08	1.33621e-09	1.37736e-08			3	3	3	3	3	3	3
CEFQDAYVLLSEK	C1(Methylthio)	P63039	60 kDa heat shock protein, mitochondrial OS=Rattus norvegicus GN=Hspd1 PE=1 SV=1 - [CH60_RAT]	1590.72	0	0	0	4.93507e+07	0	6.18424e+07	0	1.03433e+08	6.81195e+07	3.15502e+07	3.98091e+07	64724288			30.9	39.06		49.76		59.55	54.12	50.16	49.99	32.52			0.00191015	0.000341454		2.85341e-05		3.05023e-06	1.06496e-05	2.50596e-05	2.65611e-05	0.00148336			2	2		2		2	2
CEFQDAYVLLSEKK	C1(Methylthio)	P63039	60 kDa heat shock protein, mitochondrial OS=Rattus norvegicus GN=Hspd1 PE=1 SV=1 - [CH60_RAT]	1718.81	0	0	0	0	9.74069e+07	6.70732e+07	0	0	0	0	0	8.84507e+07					47.66	42.89		51.98				54.79					8.82688e-05	0.000264732		3.26443e-05				1.39396e-05					2	2		3
CIPALDSLKPANEDQK	C1(Methylthio)	P63039	60 kDa heat shock protein, mitochondrial OS=Rattus norvegicus GN=Hspd1 PE=1 SV=1 - [CH60_RAT]	1787.87	0	0	3.56931e+08	0	285006999	172444305	282809703	0	4.10965e+08	1.64359e+08	1.42191e+08	1.85837e+08			49.12		61.36	46.27	51.46		52.12	54.58	51	42.69			7.47016e-05		4.13094e-06	0.000142809	4.35843e-05		3.74395e-05	1.98552e-05	4.44824e-05	0.000304122			2		2	2	2		2
CIPALDSLKPANEDQKIGIEIIK	C1(Methylthio)	P63039	60 kDa heat shock protein, mitochondrial OS=Rattus norvegicus GN=Hspd1 PE=1 SV=1 - [CH60_RAT]	2554.35	0	0	0	2.9602e+07	5.69656e+07	0	0	0	0	0	0	3.45838e+07				40.32	30.33							50.01				0.000580604	0.00579269							6.73448e-05				3	3
CIPALDSLKPANEDQKIGIEIIKR	C1(Methylthio)	P63039	60 kDa heat shock protein, mitochondrial OS=Rattus norvegicus GN=Hspd1 PE=1 SV=1 - [CH60_RAT]	2710.46	0	0	1.45608e+08	0	0	68290690	0	0	0	6.9843e+07	0	0			40.43		41.98	56.15				56.74					0.00043928		0.00029158	1.00704e-05				8.7912e-06					3		3	3
DGKTLNDELEIIEGMKFDR		P63039	60 kDa heat shock protein, mitochondrial OS=Rattus norvegicus GN=Hspd1 PE=1 SV=1 - [CH60_RAT]	2223.1	0	0	210497149	150794021	1.86085e+08	1.88768e+08	2.15101e+08	5.78042e+07	1.95345e+08	1.06293e+08	1.0952e+08	7.24079e+07			75.59	80.72	72.81	67.76	73.16	58.23	64.17	52.58	80.57	88.23			1.75297e-07	5.76115e-08	3.56048e-07	1.14734e-06	3.06742e-07	1.01462e-05	2.43094e-06	3.69892e-05	5.91976e-08	1.03717e-08			3	3	3	3	3	3	3
DRVTDALNATR		P63039	60 kDa heat shock protein, mitochondrial OS=Rattus norvegicus GN=Hspd1 PE=1 SV=1 - [CH60_RAT]	1231.64	0	0	0	4.54978e+07	0	0	0	0	0	37853102	2.7985e+07	0				34.38						48.35	47.36					0.00218852						7.38399e-05	0.000108356					2
GANPVEIR		P63039	60 kDa heat shock protein, mitochondrial OS=Rattus norvegicus GN=Hspd1 PE=1 SV=1 - [CH60_RAT]	855.468	0	1.40584e+07	4.69913e+07	3.51955e+07	5.51683e+07	90847484	91655001	0	85409286	3.98069e+07	2.07909e+07	2.3446e+07		48.6	61.13	61.76	62	52.52	52.47		62.06	61.88	53.12	61.73		2.07058e-05	1.15636e-06	1.00021e-06	9.46436e-07	8.39636e-06	8.49359e-06		9.3345e-07	9.72952e-07	7.31293e-06	1.00714e-06		2	2	2	2	2	2		2
GIIDPTKVVR		P63039	60 kDa heat shock protein, mitochondrial OS=Rattus norvegicus GN=Hspd1 PE=1 SV=1 - [CH60_RAT]	1097.67	0	2.23089e+07	1024377109	7.76089e+08	9.93222e+08	7.39209e+08	679543387	2.15248e+07	7.57104e+08	0	4.82682e+08	5.1857e+08	30.97	57.79	61.54	47.3	61.75	65	51.59	63.2	56.08	51.4	64.09	61.69	0.00079794	1.65947e-06	6.99794e-07	1.85768e-05	6.68344e-07	3.15479e-07	6.93426e-06	4.77496e-07	2.4602e-06	7.2272e-06	3.89018e-07	6.76036e-07	3	2	2	2	2	2	2	2	2
GVMLAVDAVIAELK		P63039	60 kDa heat shock protein, mitochondrial OS=Rattus norvegicus GN=Hspd1 PE=1 SV=1 - [CH60_RAT]	1428.81	0	0	0	0	0	0	1.89002e+07	1.81527e+07	0	0	0	2.06934e+07							71.03	40.26				48.81							3.43154e-07	0.000386175				5.32666e-05							2	2
GVMLAVDAVIAELKK		P63039	60 kDa heat shock protein, mitochondrial OS=Rattus norvegicus GN=Hspd1 PE=1 SV=1 - [CH60_RAT]	1556.9	0	0	7.00504e+07	0	0	1.01075e+08	116415386	9.43617e+07	47825550	0	0	0			51.78	87.97		48.75	52.05	71.21	58.33			69.89			2.19035e-05	5.3462e-09		4.60065e-05	2.21426e-05	2.57323e-07	5.0678e-06			3.5385e-07			2	3		2	2	2	2
GVMLAVDAVIAELKK	M3(Oxidation)	P63039	60 kDa heat shock protein, mitochondrial OS=Rattus norvegicus GN=Hspd1 PE=1 SV=1 - [CH60_RAT]	1572.9	0	0	0	0	3.5411e+07	2.35642e+07	2.27208e+07	21087750	1.31101e+07	0	0	0			43.33	51.92	63.05	63.62	61.95	75.56	50.65			69.08			9.05805e-05	1.47818e-05	1.11476e-06	9.99374e-07	1.43609e-06	6.67131e-08	1.93724e-05			2.78088e-07			2	3	2	2	2	2	2
GYISPYFINTSK		P63039	60 kDa heat shock protein, mitochondrial OS=Rattus norvegicus GN=Hspd1 PE=1 SV=1 - [CH60_RAT]	1389.71	0	0	0	2.11454e+08	1.47843e+08	0	0	0	0	1.40578e+08	1.53775e+08	1.27128e+08				45.11	47.55					47.21	43.95	50.64				0.0001742	9.1412e-05					0.000101708	0.000227535	4.91898e-05				2	2
GYISPYFINTSKGQK		P63039	60 kDa heat shock protein, mitochondrial OS=Rattus norvegicus GN=Hspd1 PE=1 SV=1 - [CH60_RAT]	1702.89	0	0	151977349	124751368	1.0035e+08	6.7897e+07	0	0	0	7.17529e+07	1.1567e+08	0			73.78	61.06	61.49	60.35	35.07		33.01	60.44	57.11				2.76404e-07	5.40566e-06	4.75417e-06	5.95059e-06	0.00227155		0.00365025	6.05445e-06	1.4882e-05				2	2	2	2	3		3
IGIEIIK		P63039	60 kDa heat shock protein, mitochondrial OS=Rattus norvegicus GN=Hspd1 PE=1 SV=1 - [CH60_RAT]	785.514	0	0	0	0	0	1.35297e+07	4.85083e+07	0	20174083	1.07538e+07	1.07113e+07	0						53	49.8		47.28	47.84	53.04							5e-06	1.04465e-05		1.86625e-05	1.64048e-05	4.95416e-06							2	2		2
IQEITEQLDITTSEYEKEKLNER		P63039	60 kDa heat shock protein, mitochondrial OS=Rattus norvegicus GN=Hspd1 PE=1 SV=1 - [CH60_RAT]	2809.4	2.3452e+07	0	7.01249e+07	1.03679e+08	0	205282511	1.09032e+08	2.76876e+08	9.48467e+07	1.27389e+08	70028246	9.31462e+07	41.46		49.78	81		64.79	47.58	52.43	72.8	62.12	73.06	66.33	0.000543017		9.78325e-05	7.38725e-08		3.00364e-06	0.000151014	4.85757e-05	4.82823e-07	5.21698e-06	4.20164e-07	1.94396e-06	3		3	3		3	3	3	3
ISKGANPVEIR		P63039	60 kDa heat shock protein, mitochondrial OS=Rattus norvegicus GN=Hspd1 PE=1 SV=1 - [CH60_RAT]	1183.68	0	0	0	0	0	0	3.93239e+07	0	6.79634e+07	4.21663e+07	3.1619e+07	4.33714e+07		68.06	39.59		79.06	69.62	40.33		65.52	35.23	44.1	50.74		3.6734e-07	0.000258266		2.91788e-08	2.56488e-07	0.000217805		6.59277e-07	0.000704803	9.14256e-05	1.98184e-05		2	2		2	2	3		3
ISKGANPVEIRR		P63039	60 kDa heat shock protein, mitochondrial OS=Rattus norvegicus GN=Hspd1 PE=1 SV=1 - [CH60_RAT]	1339.78	0	0	0	3.0297e+07	1.42759e+08	1.00837e+08	2.90017e+07	0	0	4.35644e+07	3.92102e+07	3.64602e+07				34.56	44.17	41.3	31.51			33.22	38.08	34.49				0.000419934	4.5939e-05	9.26638e-05	0.000882897			0.000595539	0.000186716	0.000426758				3	3	3	3
ISSVQSIVPALEIANAHR		P63039	60 kDa heat shock protein, mitochondrial OS=Rattus norvegicus GN=Hspd1 PE=1 SV=1 - [CH60_RAT]	1905.05	1.05372e+07	0	0	0	6.59862e+07	5.22882e+07	9.57223e+07	0	0	5.62947e+07	0	6.0254e+07	44.35		87.84	92.14	61.02	48.8	71.63		79.24	71.49		71.71	0.000137731		7.0708e-09	2.41322e-09	2.84644e-06	4.67981e-05	2.40474e-07		4.46716e-08	2.80283e-07		2.39457e-07	3		2	2	3	3	3		2
KDRVTDALNATR		P63039	60 kDa heat shock protein, mitochondrial OS=Rattus norvegicus GN=Hspd1 PE=1 SV=1 - [CH60_RAT]	1359.73	0	0	5.75792e+07	0	4.5662e+07	0	0	0	0	2.84376e+07	0	0			54.2		38.36	34.89				53.66	34.71				1.38769e-05		0.000510585	0.00113519				1.50684e-05	0.00118323				2		2	3
KGVITVK		P63039	60 kDa heat shock protein, mitochondrial OS=Rattus norvegicus GN=Hspd1 PE=1 SV=1 - [CH60_RAT]	744.497	0	1.91732e+07	0	2.80678e+07	0	0	0	0	0	2.58234e+07	0	1.59107e+07		56.84		46.27						37.46		46.84		4.65782e-06		5.31108e-05						0.000403815		4.65782e-05		2		2
KGVITVKDGK		P63039	60 kDa heat shock protein, mitochondrial OS=Rattus norvegicus GN=Hspd1 PE=1 SV=1 - [CH60_RAT]	1044.64	0	5.62829e+06	0	2.08711e+07	0	0	16617778	0	0	2.91219e+07	3.64591e+07	2.212e+07		61.97		57.18			56.9			77.3	63.53	67.8		7.94164e-07		2.39282e-06			2.55217e-06			2.32761e-08	5.54511e-07	2.07448e-07		2		2			2
KISSVQSIVPALEIANAHR		P63039	60 kDa heat shock protein, mitochondrial OS=Rattus norvegicus GN=Hspd1 PE=1 SV=1 - [CH60_RAT]	2033.15	0	0	100535005	8.44844e+07	0	4.0609e+07	0	0	8.11291e+07	53155962	0	0			36.13	88.18		66.94			65.54	77.9					0.000524129	3.49726e-09		5.25985e-07			6.84173e-07	3.89234e-08					3	3		3			3
KPLVIIAEDVDGEALSTLVLNR		P63039	60 kDa heat shock protein, mitochondrial OS=Rattus norvegicus GN=Hspd1 PE=1 SV=1 - [CH60_RAT]	2365.33	0	0	0	0	0	1.69237e+07	0	0	2.4965e+07	0	2.26504e+07	18941229						60.08			108.35		107.92	110.73						1.52171e-06			2.41259e-11		2.58297e-11	1.39471e-11						3			3
LVQDVANNTNEEAGDGTTTATVLAR		P63039	60 kDa heat shock protein, mitochondrial OS=Rattus norvegicus GN=Hspd1 PE=1 SV=1 - [CH60_RAT]	2560.25	0	7.07232e+07	0	1.40514e+08	0	0	2.69303e+08	0	0	1.81142e+08	183364762	185800972		42.59		58.91	45.17		66.44	84.17		39.12	40.34	41.87		0.000459924		1.06679e-05	0.000231107		1.86129e-06	3.08174e-08		0.00102868	0.000846099	0.000581866		2		2	2		2	3
NAGVEGSLIVEK		P63039	60 kDa heat shock protein, mitochondrial OS=Rattus norvegicus GN=Hspd1 PE=1 SV=1 - [CH60_RAT]	1215.66	0	6.28399e+07	0	0	0	2.32899e+08	0	9.8134e+07	0	2.03472e+08	64746177	1.18707e+08		38.57				32.62		33.74		32.52	35.64	32.41		0.000507333				0.00207866		0.00154274		0.00212708	0.00103701	0.00206682		2				2		2
NQLKDMAIATGGAVFGEEGLNLNLEDVQAHDLGK		P63039	60 kDa heat shock protein, mitochondrial OS=Rattus norvegicus GN=Hspd1 PE=1 SV=1 - [CH60_RAT]	3567.77	0	0	6.4662e+07	0	0	36829358	6.81117e+07	0	4.58251e+07	0	2.88036e+07	0			69.37			54.9	99.47		55.04		61.56				9.59573e-07			2.96088e-05	1.04506e-09		2.86696e-05		6.21427e-06				3			3	3		3
QSKPVTTPEEIAQVATISANGDKDIGNIISDAMKK	N27(Deamidated)	P63039	60 kDa heat shock protein, mitochondrial OS=Rattus norvegicus GN=Hspd1 PE=1 SV=1 - [CH60_RAT]	3670.88	0	0	2.39535e+08	1.26844e+08	0	0	39107003	0	0	1.11432e+08	1.05944e+08	1.01592e+08			43.51	44.35			31.41			42.37	51.28	45.57			0.000398862	0.000299335			0.0056376			0.000463543	5.92062e-05	0.000214932			4	4			4
RGVMLAVDAVIAELK		P63039	60 kDa heat shock protein, mitochondrial OS=Rattus norvegicus GN=Hspd1 PE=1 SV=1 - [CH60_RAT]	1584.91	0	0	0	0	0	6.07476e+06	0	6.96689e+06	0	0	1.85391e+07	0					62.16	42.65		54.84			56.96	62.5					1.21627e-06	0.000116799		6.56191e-06			4.32951e-06	1.18092e-06					3	2		2
RGVMLAVDAVIAELKK	M4(Oxidation)	P63039	60 kDa heat shock protein, mitochondrial OS=Rattus norvegicus GN=Hspd1 PE=1 SV=1 - [CH60_RAT]	1729	0	0	2.05234e+07	2.43849e+07	42772450	2.63989e+07	2.30373e+07	0	1.8566e+07	3.96645e+07	5.72085e+07	0			40.56	62.03	62.15	65.55	76.08		69.07	61.91	72.95				0.000162619	1.2219e-06	1.12764e-06	5.15432e-07	4.43887e-08		2.41565e-07	1.1595e-06	9.12583e-08				3	3	3	3	3		3
RGVMLAVDAVIAELKK		P63039	60 kDa heat shock protein, mitochondrial OS=Rattus norvegicus GN=Hspd1 PE=1 SV=1 - [CH60_RAT]	1713.01	0	0	90649808	1.88644e+08	2.34604e+08	8.89835e+07	180975531	2.86234e+08	7.61858e+07	1.21698e+08	2.23991e+08	330166585			62.61	60.07	59.58	56.34	65.42	66.1	58.46	60.31	63.03	58.81			9.59485e-07	1.72202e-06	1.92769e-06	4.29706e-06	5.74156e-07	4.29574e-07	2.49481e-06	1.62944e-06	9.20814e-07	2.30164e-06			3	3	3	3	3	3	3
RIQEITEQLDITTSEYEKEKLNER		P63039	60 kDa heat shock protein, mitochondrial OS=Rattus norvegicus GN=Hspd1 PE=1 SV=1 - [CH60_RAT]	2965.51	0	0	0	0	1.27431e+08	0	0	1.61444e+08	51111719	4.56002e+07	5.751e+07	7.38722e+07					43.66			33.89	35.82	49.75	31.04	41.06					0.0003681			0.00347071	0.00223855	8.68588e-05	0.00657183	0.000669832					4			4	4
SIAKEGFEK		P63039	60 kDa heat shock protein, mitochondrial OS=Rattus norvegicus GN=Hspd1 PE=1 SV=1 - [CH60_RAT]	1008.54	1.5597e+07	6.60812e+07	0	1.01169e+08	0	2.46877e+08	0	0	0	1.13417e+08	9.67658e+07	9.91582e+07	34.54	30.92	38.48	37.79		39.43				37.97	39.53	35.77	0.00121288	0.00279138	0.000489575	0.000573877		0.000393386				0.000550578	0.000384432	0.000913733	2	2	2	2		2
SIDLKDKYK		P63039	60 kDa heat shock protein, mitochondrial OS=Rattus norvegicus GN=Hspd1 PE=1 SV=1 - [CH60_RAT]	1109.62	5.09555e+07	0	9.50038e+08	2.39389e+08	0	3.47917e+08	3.56722e+08	7.51635e+06	0	0	0	2.1741e+08	33.36		34.76	35.09	38.47	38.6	32.85	31.26	45.33	44.23	45.54	34.64	0.000761174		0.000551422	0.000526561	0.000241796	0.000234665	0.00088196	0.00123448	5.5687e-05	6.41873e-05	4.74732e-05	0.000566871	2		2	2	3	2	2	2	3
SIDLKDKYKNIGAK		P63039	60 kDa heat shock protein, mitochondrial OS=Rattus norvegicus GN=Hspd1 PE=1 SV=1 - [CH60_RAT]	1592.9	0	0	0	0	3.91204e+08	1.35535e+08	0	0	5.98544e+07	0	0	7.5812e+07					32.9	48.04			32			48.61					0.00133344	3.4548e-05			0.00138811			3.02986e-05					3	3			3
TLNDELEIIEGMK		P63039	60 kDa heat shock protein, mitochondrial OS=Rattus norvegicus GN=Hspd1 PE=1 SV=1 - [CH60_RAT]	1504.75	0	0	38398988	38126414	2.92351e+07	52843556	138554138	0	9.69964e+07	2.83698e+07	33762153	3.01708e+07			57.21	61.08	44.35	82.73	82.2		56.54	60.65	44.89	31.85			1.15015e-05	4.56201e-06	0.000216697	3.04001e-08	3.5551e-08		1.29764e-05	5.03681e-06	0.000175143	0.00385347			2	2	2	2	2		2
TLNDELEIIEGMKFDR		P63039	60 kDa heat shock protein, mitochondrial OS=Rattus norvegicus GN=Hspd1 PE=1 SV=1 - [CH60_RAT]	1922.95	0	0	1.41818e+08	1.60771e+08	1.53387e+08	2.11151e+08	0	0	251808496	1.01195e+08	164258386	1.43765e+08			67.82	92.35	69.16	55.07	64.58	59.76	68.62	79.75	63.33	53.07			1.03248e-06	3.66725e-09	8.06904e-07	1.96038e-05	2.19453e-06	6.60511e-06	8.65646e-07	6.6733e-08	2.90322e-06	3.10699e-05			2	2	2	2	3	3	2
TVIIEQSWGSPK		P63039	60 kDa heat shock protein, mitochondrial OS=Rattus norvegicus GN=Hspd1 PE=1 SV=1 - [CH60_RAT]	1344.71	0	2.03644e+07	0	3.13617e+08	0	3.88201e+08	5.17965e+08	2.98258e+08	345973146	284273624	405405925	3.8076e+08		76.34		72.35		93.94	89.04	72.26	85.35	88.91	89.46	85.89		1.34719e-07		3.3762e-07		2.40169e-09	8.2951e-09	3.44689e-07	1.69211e-08	5.3982e-09	5.71862e-09	1.53291e-08		2		2		2	2	2	2
VGEVIVTK		P63039	60 kDa heat shock protein, mitochondrial OS=Rattus norvegicus GN=Hspd1 PE=1 SV=1 - [CH60_RAT]	844.514	0	4.84824e+06	0	0	0	1.60845e+07	4.86034e+07	0	0	0	1.2338e+07	0		38.99				34.83	54.7				64.67			0.000454258				0.00131541	1.21984e-05				1.22829e-06			2				2	2
VGEVIVTKDDAMLLK		P63039	60 kDa heat shock protein, mitochondrial OS=Rattus norvegicus GN=Hspd1 PE=1 SV=1 - [CH60_RAT]	1630.9	0	0	0	3.02817e+08	3.40254e+08	3.03682e+08	4.16145e+08	366039763	3.87806e+08	2.55969e+08	253096198	3.43158e+08			53.25	68.76	78.67	61.99	63.49	60.59	67.29	58.14	63.5	68.19			1.65603e-05	4.65659e-07	5.70492e-08	2.33992e-06	1.90278e-06	2.9681e-06	6.34569e-07	6.29193e-06	1.51872e-06	6.44746e-07			2	3	3	3	3	3	3
VGGTSDVEVNEKKDR		P63039	60 kDa heat shock protein, mitochondrial OS=Rattus norvegicus GN=Hspd1 PE=1 SV=1 - [CH60_RAT]	1632.82	0	3.35331e+07	1.31952e+08	0	7.31814e+07	1.91599e+08	7.96537e+07	812274	0	1.40565e+08	0	8.22423e+07	99.63	84.67	46.18	92.3	31.83	78.54	65.61	65.33	97.81	76.93		80.21	6.96915e-10	2.13246e-08	0.000150619	3.68027e-09	0.00400249	8.53748e-08	1.71743e-06	1.83181e-06	1.05969e-09	1.29772e-07		5.95498e-08	2	3	3	2	3	3	3	3	2
VGGTSDVEVNEKKDRVTDALNATR		P63039	60 kDa heat shock protein, mitochondrial OS=Rattus norvegicus GN=Hspd1 PE=1 SV=1 - [CH60_RAT]	2574.31	3.51384e+07	0	0	7.55257e+07	291682431	3.55396e+07	0	0	0	0	0	8.13178e+07	54.09			49.5	53.9	47.58						36.93	3.02205e-05			9.36885e-05	3.40163e-05	0.000148395						0.00169312	3			3	3	3
VTDALNATR		P63039	60 kDa heat shock protein, mitochondrial OS=Rattus norvegicus GN=Hspd1 PE=1 SV=1 - [CH60_RAT]	960.511	1.69771e+07	90350971	4.86957e+08	2.87012e+08	3.33193e+08	3.76699e+08	481904101	0	0	2.92094e+08	339248170	2.98689e+08	37.51	63.4	63.44	66.01	63.43	61.75	67.88	61.21	60.86	56.14	59.16	56.39	0.000922579	2.37686e-06	2.33242e-06	1.29065e-06	2.3378e-06	3.34172e-06	8.39087e-07	3.89769e-06	4.10176e-06	1.25259e-05	6.30962e-06	1.18252e-05	2	2	2	2	2	2	2	2	2
VTKDGVTVAK		P63039	60 kDa heat shock protein, mitochondrial OS=Rattus norvegicus GN=Hspd1 PE=1 SV=1 - [CH60_RAT]	1017.59	1.8406e+07	5.00493e+07	0	7.20878e+07	255191566	2.6508e+08	148903561	0	0	0	1.22408e+08	7.21289e+07	57.03	59.47		41.94	57.25	47.81	56.47				57.69	57.36	5.74643e-06	3.27641e-06		0.000185523	5.46258e-06	4.80173e-05	6.53729e-06				4.93626e-06	5.32596e-06	2	2		2	2	2	2
DLLFKPVAELRK		P47860	6-phosphofructokinase type C OS=Rattus norvegicus GN=Pfkp PE=1 SV=2 - [K6PP_RAT]	1428.86	0	0	56894028	6.62554e+07	0	3.77905e+07	0	0	63284467	3.59825e+07	4.35139e+07	24442863			37.64	36.15		32.11	39.59		41.17	39.37	35.95	34.09			0.00025828	0.000339725		0.000861248	0.000164851		0.000106937	0.000173417	0.000546309	0.000623907			3	3		3	3		3
KATDFEHRIPK		P47860	6-phosphofructokinase type C OS=Rattus norvegicus GN=Pfkp PE=1 SV=2 - [K6PP_RAT]	1341.73	0	0	0	2.42735e+07	18977698	0	0	0	0	0	1.80625e+07	0			47.01	36.93	31.33				46.29		30.82				6.66876e-05	0.000679274	0.00246629				7.87127e-05		0.0028564				2	3	3				2
LAIKEPDDKIPK		P47860	6-phosphofructokinase type C OS=Rattus norvegicus GN=Pfkp PE=1 SV=2 - [K6PP_RAT]	1366.79	0	0	0	0	0	1.2533e+08	2.45067e+08	0	2.23419e+08	8.92405e+07	0	9.66877e+07						35.63	42.55		42.79	36.09		45.29						0.000437643	9.72832e-05		9.2053e-05	0.000430564		4.73282e-05						3	3		3
RFDEAVK		P47860	6-phosphofructokinase type C OS=Rattus norvegicus GN=Pfkp PE=1 SV=2 - [K6PP_RAT]	864.457	0	0	0	3.60255e+07	0	3.8734e+07	54771128	0	0	4.08402e+07	3.48153e+07	2.38442e+07				31.54		34.23	36.44			39.72	30.64	40.11				0.0027006		0.00145365	0.000873898			0.00041064	0.00332247	0.000375371				2		2	2
RFDEAVKLR		P47860	6-phosphofructokinase type C OS=Rattus norvegicus GN=Pfkp PE=1 SV=2 - [K6PP_RAT]	1133.64	0	0	0	2.07997e+07	7.90214e+07	4.62207e+07	0	0	0	0	0	0				31.76	38.13	30.9										0.00250053	0.000384539	0.00284491										3	3	3
SFEGNLNTYKR		P47860	6-phosphofructokinase type C OS=Rattus norvegicus GN=Pfkp PE=1 SV=2 - [K6PP_RAT]	1328.66	0	4.29453e+06	2.44821e+08	1.46701e+08	176188372	0	1.27308e+08	9.72892e+06	1.4011e+08	0	9.65543e+07	0		55.75	67.9	68.02	66.58		66.97	60.53	70.76		65.16			7.84914e-06	4.78434e-07	4.65395e-07	7.36283e-07		6.73046e-07	2.61109e-06	2.47641e-07		9.90566e-07			2	2	2	2		2	2	2
SNCNVAIINVGAPAAGMNAAVR	C3(Methylthio)	P47860	6-phosphofructokinase type C OS=Rattus norvegicus GN=Pfkp PE=1 SV=2 - [K6PP_RAT]	2159.05	0	0	0	0	0	0	0	11346030	0	2.40017e+07	3.10071e+07	3.46006e+07								69.34		81.4	69.29	64.82								7.45041e-07		4.85372e-08	7.36004e-07	2.25783e-06								2
YLEHLSGDGK		P47860	6-phosphofructokinase type C OS=Rattus norvegicus GN=Pfkp PE=1 SV=2 - [K6PP_RAT]	1118.55	0	8.18432e+06	8.96592e+07	0	0	5.15115e+07	6.04243e+07	0	8.37035e+07	3.92181e+07	0	4.70073e+07		46.87	47.49			39.4	50.05		42.03	47.13		45.42		9.66269e-05	7.66423e-05			0.000539632	4.79448e-05		0.000281976	9.39165e-05		0.000139233		2	2			2	2		2
AKFEELNMDLFR		P06761	78 kDa glucose-regulated protein OS=Rattus norvegicus GN=Hspa5 PE=1 SV=1 - [GRP78_RAT]	1512.75	0	0	7.37273e+07	6.702e+07	6.33442e+07	0	0	55162445	0	51581413	0	0			61.79	65.46	70.39			70.42		70.47					2.61576e-06	1.19467e-06	3.65645e-07			3.81285e-07		3.67946e-07					2	2	2			2
FLPFKVVEKK		P06761	78 kDa glucose-regulated protein OS=Rattus norvegicus GN=Hspa5 PE=1 SV=1 - [GRP78_RAT]	1234.75	0	0	0	6.46675e+07	0	0	0	0	48067738	0	49804285	4.45551e+07			31.68	42.65					36.19		45.46	46.19			0.000677595	5.41963e-05					0.000239867		2.83772e-05	2.39867e-05			3	2					2
IINEPTAAAIAYGLDKR		P06761	78 kDa glucose-regulated protein OS=Rattus norvegicus GN=Hspa5 PE=1 SV=1 - [GRP78_RAT]	1816	0	0	1.75985e+08	162040117	169708459	5.3703e+07	0	0	1.38032e+08	0	0	1.20781e+08			100.21	99.18	94.76	75.33			112.87	62.83		94.02			3.90646e-10	6.15985e-10	1.78794e-09	1.42148e-07			2.78865e-11	2.55385e-06		1.60493e-09			2	2	2	2			2
ITPSYVAFTPEGER		P06761	78 kDa glucose-regulated protein OS=Rattus norvegicus GN=Hspa5 PE=1 SV=1 - [GRP78_RAT]	1566.78	0	0	0	4.41192e+07	0	3.07907e+07	6.42781e+07	0	0	0	0	0				55.44		60.54	30.23									1.32878e-05		4.06217e-06	0.00441015									2		2	2
MKETAEAYLGKK		P06761	78 kDa glucose-regulated protein OS=Rattus norvegicus GN=Hspa5 PE=1 SV=1 - [GRP78_RAT]	1368.72	0	0	3.91856e+07	0	14208096	0	0	2.86692e+06	0	0	0	0			59.64		45.26			41.01		40.52					4.67163e-06		0.000128076			0.000340776		0.00039922					3		3			3
VLEDSDLKKSDIDEIVLVGGSTR		P06761	78 kDa glucose-regulated protein OS=Rattus norvegicus GN=Hspa5 PE=1 SV=1 - [GRP78_RAT]	2488.31	0	0	0	0	44067157	0	43703581	5.12301e+07	41096602	3.94719e+07	37214611	3.95264e+07					57.73		57.1	48.7	37.02	69.23	61.94	35.14					9.95066e-06		1.13091e-05	8.29612e-05	0.00113207	7.40273e-07	4.41417e-06	0.00189842					3		3	3	3
AGIPKEEVKEVYMGNVIQGGEGQAPTR	M13(Oxidation); N15(Deamidated)	P17764	Acetyl-CoA acetyltransferase, mitochondrial OS=Rattus norvegicus GN=Acat1 PE=1 SV=1 - [THIL_RAT]	2874.45	0	0	22824685	10691456	0	0	0	1.17017e+07	0	0	0	0			38.21	50.71				37.02							0.00132132	7.72754e-05				0.00175769							3	3				3
AGIPKEEVKEVYMGNVIQGGEGQAPTR	M13(Oxidation)	P17764	Acetyl-CoA acetyltransferase, mitochondrial OS=Rattus norvegicus GN=Acat1 PE=1 SV=1 - [THIL_RAT]	2873.44	0	0	0	0	7.43158e+07	5.41994e+07	0	0	0	0	0	1.38178e+07					47.09	54.57						43.21					0.000178822	3.29938e-05						0.000429776					3	3
AGIPKEEVKEVYMGNVIQGGEGQAPTR		P17764	Acetyl-CoA acetyltransferase, mitochondrial OS=Rattus norvegicus GN=Acat1 PE=1 SV=1 - [THIL_RAT]	2857.45	9.88827e+07	0	3.86385e+08	2.54172e+08	0	2.83218e+08	0	407527170	3.32304e+08	1.84226e+08	3.02166e+08	3.97759e+08	66.32		45.28	71.23		61.27		56.68	52.45	53.04	56.32	77.7	2.06511e-06		0.000231257	6.21518e-07		6.41946e-06		1.87935e-05	5.17656e-05	4.39484e-05	1.9601e-05	1.5454e-07	3		3	3		3		3	3
FANEITPITISVK		P17764	Acetyl-CoA acetyltransferase, mitochondrial OS=Rattus norvegicus GN=Acat1 PE=1 SV=1 - [THIL_RAT]	1432.8	0	0	3.26383e+08	2.76607e+08	0	1.99519e+08	4.34124e+08	0	3.23323e+08	214395465	0	0			45.74	35.7		34.28	45.81		33.41	45.94					0.000124009	0.000874749		0.00151166	8.52871e-05		0.00221178	9.16859e-05					2	2		2	2		2
GATPYGGVKLEDLIVK		P17764	Acetyl-CoA acetyltransferase, mitochondrial OS=Rattus norvegicus GN=Acat1 PE=1 SV=1 - [THIL_RAT]	1659.93	0	0	1.09045e+08	0	0	0	90508943	0	0	0	0	4.26964e+07			31.94				35.8					37.84			0.00239901				0.000644416					0.000419315			2				2
GATPYGGVKLEDLIVKDGLTDVYNK		P17764	Acetyl-CoA acetyltransferase, mitochondrial OS=Rattus norvegicus GN=Acat1 PE=1 SV=1 - [THIL_RAT]	2665.41	2.40974e+07	0	0	4.6482e+08	0	4.05825e+08	4.17027e+08	2.20254e+08	5.09727e+08	0	4.88456e+08	3.38342e+08	60.56			49.86		45.76	42.14	60.33	43.64		54.56	49.38	5.71365e-06			6.09329e-05		0.000173877	0.000391003	6.02439e-06	0.000274646		2.22215e-05	6.86305e-05	3			3		3	3	3	3
GKPDVVVKEDEEYKR		P17764	Acetyl-CoA acetyltransferase, mitochondrial OS=Rattus norvegicus GN=Acat1 PE=1 SV=1 - [THIL_RAT]	1790.93	0	0	0	1.23301e+08	0	1.82534e+08	0	0	198090650	1.80925e+08	95088221	1.49012e+08			52.19	87.78	39.01	74.83	51.8	58.68	82.21	83.48	67.6	89.32			4.07665e-05	1.10038e-08	0.000803859	2.12109e-07	4.39361e-05	8.74097e-06	3.96775e-08	2.87197e-08	1.17302e-06	7.89412e-09			3	2	3	2	3	3	2
GKPDVVVKEDEEYKRVDFSK		P17764	Acetyl-CoA acetyltransferase, mitochondrial OS=Rattus norvegicus GN=Acat1 PE=1 SV=1 - [THIL_RAT]	2367.22	0	0	0	0	0	3.85913e+07	0	8.83697e+07	0	3.12232e+07	0	0						30.66		42.3		35.59								0.00665735		0.000447521		0.00212564								3		3
IHMGNCAENTAK	C6(Methylthio)	P17764	Acetyl-CoA acetyltransferase, mitochondrial OS=Rattus norvegicus GN=Acat1 PE=1 SV=1 - [THIL_RAT]	1334.56	0	0	2.58554e+08	1.42506e+08	0	1.24728e+08	164573023	0	0	1.01206e+08	1.23812e+08	1.2649e+08			46.88	31.85		36.02	32.8			36.19	42.25	37.61			2.97419e-05	0.000947039		0.00036255	0.000760971			0.000348633	8.6371e-05	0.000251402			2	2		2	2
KLSISREEQDKYAIGSYTR		P17764	Acetyl-CoA acetyltransferase, mitochondrial OS=Rattus norvegicus GN=Acat1 PE=1 SV=1 - [THIL_RAT]	2244.16	0	0	0	0	548060759	0	0	4.8988e+07	3.18004e+07	0	327125404	0				42.73	62.31	38.45		99.51	34.81	35.89	73.76					0.000453335	5.19928e-06	0.00120027		9.90703e-10	0.00280814	0.00203529	3.38685e-07					3	2	3		2	2
LGTIAIQGAIEK		P17764	Acetyl-CoA acetyltransferase, mitochondrial OS=Rattus norvegicus GN=Acat1 PE=1 SV=1 - [THIL_RAT]	1213.72	9.73948e+07	6.4489e+07	7.63819e+08	451325105	6.56805e+08	4.91091e+08	416669227	342032431	4.68876e+08	4.98378e+08	4.84054e+08	6.54776e+08	40.73	56.34	41.99	57.82	37.06	50.38	51.87	58.61	66.86	61.3	60.47	57.78	0.000253584	5.80684e-06	0.000249803	4.1299e-06	0.000590366	2.29055e-05	1.62532e-05	3.37416e-06	5.15157e-07	1.85328e-06	2.78203e-06	4.16812e-06	2	2	2	2	2	2	2	2	2
LKVKPLAR		P17764	Acetyl-CoA acetyltransferase, mitochondrial OS=Rattus norvegicus GN=Acat1 PE=1 SV=1 - [THIL_RAT]	924.635	0	0	1.24587e+08	0	2.27336e+08	1.06949e+08	6.7062e+07	0	0	5.51245e+07	0	4.0613e+07			32.48		35.23	35.34	36.17			34.82		34.5			0.000563599		0.000299206	0.000291723	0.000240974			0.000328829		0.000353973			2		2	2	2
QATLGAGLPIATPCTTVNK	C14(Methylthio)	P17764	Acetyl-CoA acetyltransferase, mitochondrial OS=Rattus norvegicus GN=Acat1 PE=1 SV=1 - [THIL_RAT]	1901.98	0	0	0	0	1.63466e+08	1.69389e+08	0	0	0	1.47397e+08	0	1.08603e+08		30.06			36.34	34.11				32.97		34.41		0.00784092			0.00173044	0.00289172				0.00381019		0.00284361		2			2	2
SKEAWDAGK		P17764	Acetyl-CoA acetyltransferase, mitochondrial OS=Rattus norvegicus GN=Acat1 PE=1 SV=1 - [THIL_RAT]	991.483	0	8.69371e+06	0	0	0	2.56145e+07	1.05029e+07	0	0	0	25422479	0		50.78				39.42	31.93				41.75			3.34241e-05				0.000457151	0.00256484				0.000267338			2				2	2
SKEAWDAGKFANEITPITISVK	N12(Deamidated)	P17764	Acetyl-CoA acetyltransferase, mitochondrial OS=Rattus norvegicus GN=Acat1 PE=1 SV=1 - [THIL_RAT]	2406.25	0	0	4.21151e+07	28584569	4.03396e+07	0	0	0	0	2.48702e+07	0	3.29893e+07			68.34	67.49	77.84					66.58		67.08			1.22373e-06	1.3457e-06	1.30728e-07					1.67037e-06		1.44955e-06			3	3	3
SKEAWDAGKFANEITPITISVK		P17764	Acetyl-CoA acetyltransferase, mitochondrial OS=Rattus norvegicus GN=Acat1 PE=1 SV=1 - [THIL_RAT]	2405.27	1.937e+08	0	652050033	5.24668e+08	9.16372e+08	560732468	3.38269e+08	0	339503426	0	4.69031e+08	5.63245e+08	84.48		83.98	82.4	75.07	85.07	79.45		83.1		84.14	90.79	1.96048e-08		2.71962e-08	3.51018e-08	2.06929e-07	1.69589e-08	6.41281e-08		2.66929e-08		2.12013e-08	4.91872e-09	3		3	3	3	3	3		3
TPIGSFLGSLASQPATK		P17764	Acetyl-CoA acetyltransferase, mitochondrial OS=Rattus norvegicus GN=Acat1 PE=1 SV=1 - [THIL_RAT]	1674.91	0	2.42175e+07	2.42776e+09	1.73839e+09	2.17289e+09	1.49828e+09	1.18855e+09	0	1.77138e+09	0	1.57942e+09	1206978411		65.62	71.5	62.45	69.62	61.97	60.2		54.73	57.04	73.87	59.82		1.69978e-06	4.92022e-07	3.58377e-06	7.31265e-07	3.93905e-06	6.39845e-06		2.25463e-05	1.28503e-05	2.6048e-07	7.45257e-06		2	2	2	2	2	2		2
TVFQKENGTVTAANASTLNDGAAAVVLMTAEAAQR	N19(Deamidated)	P17764	Acetyl-CoA acetyltransferase, mitochondrial OS=Rattus norvegicus GN=Acat1 PE=1 SV=1 - [THIL_RAT]	3521.75	4.04162e+07	0	0	3.26459e+07	0	4.31404e+07	27738206	2.53024e+07	5.46111e+07	0	44350737	4.33583e+07	47.85			70.15		67.26	78.15	42.01	68.29		51.8	44.87	0.000176363			9.99863e-07		1.99208e-06	1.60764e-07	0.000664129	1.55664e-06		6.73907e-05	0.000350274	3			3		3	3	3	3
VCASGMK	C2(Methylthio)	P17764	Acetyl-CoA acetyltransferase, mitochondrial OS=Rattus norvegicus GN=Acat1 PE=1 SV=1 - [THIL_RAT]	741.31	0	1.84476e+07	0	0	0	0	5.43977e+07	0	0	0	3.69449e+07	2.77378e+07		48.53					36.93				49.44	49.57		1.39949e-05					0.000202288				1.13493e-05	1.10146e-05		2					2
VDFSKVPK		P17764	Acetyl-CoA acetyltransferase, mitochondrial OS=Rattus norvegicus GN=Acat1 PE=1 SV=1 - [THIL_RAT]	919.525	0	5.64547e+07	0	3.15193e+08	0	0	248811359	8029534	0	0	0	1.74497e+08		37.1		37.19			38.77	30.14				37.48		0.000555706		0.000544308			0.000358397	0.00275959				0.000509149		2		2			2	2
AKDINQEVYNFLATAGAK		Q9ER34	Aconitate hydratase, mitochondrial OS=Rattus norvegicus GN=Aco2 PE=1 SV=2 - [ACON_RAT]	1953.01	0	0	2.1089e+08	1.62172e+08	1.17667e+08	1.10963e+08	2.28013e+08	0	0	0	1.08337e+08	8.47401e+07			53.87	44.61	83.22	66.18	60.13		68.88		49.25	63.42			2.76888e-05	0.00022659	3.12062e-08	1.55439e-06	6.64799e-06		8.41227e-07		8.02239e-05	2.95742e-06			3	3	3	3	3		2
ATIERDGYAQILR		Q9ER34	Aconitate hydratase, mitochondrial OS=Rattus norvegicus GN=Aco2 PE=1 SV=2 - [ACON_RAT]	1505.81	0	0	3.78378e+08	0	240931567	148352448	0	2.09472e+08	1.82838e+08	2.2731e+08	121633825	0			52.45	38.27	50.96	57		51.24	48.91	53.93	48.37	30.29			2.3323e-05	0.000737234	3.56747e-05	8.87892e-06		3.08165e-05	6.36217e-05	1.82059e-05	6.47679e-05	0.00463026			3	2	3	3		3	3
CKSQFTITPGSEQIR	C1(Methylthio)	Q9ER34	Aconitate hydratase, mitochondrial OS=Rattus norvegicus GN=Aco2 PE=1 SV=2 - [ACON_RAT]	1740.83	0	0	347846180	230280355	197930133	1.34948e+08	1.30976e+08	0	159713828	1.64816e+08	1.2114e+08	2.29905e+08			77.77	65.35	62.97	77.98	61.69		61.59	64.1	77.61	65.52			8.94033e-08	1.59e-06	2.69994e-06	8.27949e-08	3.42209e-06		3.46713e-06	2.00358e-06	9.88268e-08	1.50091e-06			2	2	2	2	2		2
CTTDHISAAGPWLK	C1(Methylthio)	Q9ER34	Aconitate hydratase, mitochondrial OS=Rattus norvegicus GN=Aco2 PE=1 SV=2 - [ACON_RAT]	1545.71	0	0	483287223	3.10282e+08	0	0	0	2.41622e+07	281889872	0	165057799	2.94799e+08			52.76	43.57	59.42	58.04	51.34	58.66	56.78	49.66	46.68	50.28			1.48306e-05	0.000127467	3.48578e-06	4.55405e-06	2.13009e-05	4.08433e-06	6.19187e-06	3.02802e-05	6.01393e-05	2.67205e-05			3	3	2	2	2	3	3
DGYAQILR		Q9ER34	Aconitate hydratase, mitochondrial OS=Rattus norvegicus GN=Aco2 PE=1 SV=2 - [ACON_RAT]	935.495	0	2.45724e+07	1.10794e+08	0	55057582	27145411	1.37043e+08	0	1.34487e+08	6.76887e+07	0	0		63.59	64.37		71.98	64.36	50.97		64.23	72.15				1.77196e-06	1.48066e-06		2.56717e-07	1.70393e-06	3.23933e-05		1.52917e-06	2.52958e-07				2	2		2	2	2		2
DVGGIVLANACGPCIGQWDR	C11(Methylthio); C14(Methylthio)	Q9ER34	Aconitate hydratase, mitochondrial OS=Rattus norvegicus GN=Aco2 PE=1 SV=2 - [ACON_RAT]	2135.95	0	0	1.02165e+08	0	0	6.31834e+07	103597986	3.68867e+07	6.45834e+07	6.88253e+07	8.24172e+07	0			36.33			94.95	77.64	65.56	77.58	45.68	65.71				0.000570382			9.11685e-10	4.90733e-08	7.7832e-07	4.97559e-08	7.30069e-05	8.32457e-07				2			2	2	2	2
DVGGIVLANACGPCIGQWDRK	C11(Methylthio); C14(Methylthio)	Q9ER34	Aconitate hydratase, mitochondrial OS=Rattus norvegicus GN=Aco2 PE=1 SV=2 - [ACON_RAT]	2264.04	0	0	7.4385e+07	0	6.04279e+07	2.71012e+07	0	0	0	1.06975e+08	8.40705e+07	142489573			57.15		63.57	41.34		37.22		59.3	55.56	78.89			9.54125e-06		2.26364e-06	0.00037093		0.000957836		6.10947e-06	1.43155e-05	6.58522e-08			2		2	2		3
EGWPLDIR		Q9ER34	Aconitate hydratase, mitochondrial OS=Rattus norvegicus GN=Aco2 PE=1 SV=2 - [ACON_RAT]	985.511	6.04396e+06	0	28816242	3.26482e+07	2.50234e+07	36598803	112009318	0	80380392	24443233	0	0	42.38		44.09	52.62	62.61	52.25	39.61		39.67	52.64			0.000208115		0.000124781	1.7778e-05	1.94638e-06	1.90612e-05	0.000388355		0.000345263	1.76963e-05			2		2	2	2	2	2		2
EHAALEPR		Q9ER34	Aconitate hydratase, mitochondrial OS=Rattus norvegicus GN=Aco2 PE=1 SV=2 - [ACON_RAT]	922.474	0	0	0	6.0383e+07	2.81687e+07	1.03514e+08	0	0	0	0	7.59653e+07	5.54074e+07				35.74	35.51	56.41					40.41	41.3				0.000720052	0.000759213	6.17112e-06					0.000245677	0.000200154				2	2	2
FKLEAPDADELPR		Q9ER34	Aconitate hydratase, mitochondrial OS=Rattus norvegicus GN=Aco2 PE=1 SV=2 - [ACON_RAT]	1500.77	0	0	1.08784e+08	168521790	135649022	1.78755e+08	267520073	0	2.937e+08	1.34841e+08	134168908	1.35921e+08	33.39		68.89	68.67	71.93	68.41	78.75		59.43	60.48	67.22	76.47	0.00261141		7.35995e-07	7.67447e-07	3.55871e-07	8.43637e-07	7.40104e-08		6.49942e-06	4.02914e-06	1.17596e-06	1.52161e-07	3		2	2	2	2	2		2
FNPETDFLTGKDGK		Q9ER34	Aconitate hydratase, mitochondrial OS=Rattus norvegicus GN=Aco2 PE=1 SV=2 - [ACON_RAT]	1568.75	3.60597e+07	0	147703612	0	0	0	1.08436e+08	0	1.90583e+08	0	1.04754e+08	0	43.59		53.8		68.07		44.13		58.67		63		0.000218761		2.10519e-05		7.40787e-07		0.000216366		6.18033e-06		2.68135e-06		2		2		3		2		2
FNPETDFLTGKDGKK		Q9ER34	Aconitate hydratase, mitochondrial OS=Rattus norvegicus GN=Aco2 PE=1 SV=2 - [ACON_RAT]	1696.85	0	0	236450740	1.98445e+08	0	0	0	0	0	1.33657e+08	0	0			30.15	35.3				55.73		65.43					0.00550649	0.00169695				1.52361e-05		1.68987e-06					2	2				3
FRGHLDNISNNLLIGAINIENGKANSVR	N21(Deamidated)	Q9ER34	Aconitate hydratase, mitochondrial OS=Rattus norvegicus GN=Aco2 PE=1 SV=2 - [ACON_RAT]	3050.59	0	0	1.71559e+08	1.47457e+08	0	0	0	268473331	2.32928e+07	1.09712e+08	1.41858e+08	229939079			69.53	49.18	43.8	50.02	54.81	66.32	60.86	71.47	51.85	44.63			7.5772e-07	7.06571e-05	0.000279302	6.12174e-05	2.26303e-05	1.61009e-06	5.57839e-06	4.88304e-07	4.01675e-05	0.00023588			3	3	4	4	4	3	3
GHLDNISNNLLIGAINIENGKANSVR	N16(Deamidated); N19(Deamidated)	Q9ER34	Aconitate hydratase, mitochondrial OS=Rattus norvegicus GN=Aco2 PE=1 SV=2 - [ACON_RAT]	2748.43	0	0	0	0	0	1.12587e+07	0	0	0	7218739	2.54138e+07	0						35.11				74.35	81.9							0.00240489				2.8648e-07	5.10067e-08							3
GHLDNISNNLLIGAINIENGKANSVR	N19(Deamidated)	Q9ER34	Aconitate hydratase, mitochondrial OS=Rattus norvegicus GN=Aco2 PE=1 SV=2 - [ACON_RAT]	2747.45	0	0	8.67544e+07	70593745	1.00322e+08	6.40546e+07	1.00321e+08	1.00107e+08	8.01262e+07	2.5336e+07	7.84095e+07	79816277			87.8	98.13	86.04	74.94	97.77	78.34	89.6	87.1	87.15	71.67			1.2032e-08	1.09978e-09	1.77953e-08	2.26042e-07	1.16976e-09	1.06252e-07	7.83982e-09	1.37464e-08	1.33963e-08	5.37808e-07			3	3	3	3	3	3	3
GKCTTDHISAAGPWLK	C3(Methylthio)	Q9ER34	Aconitate hydratase, mitochondrial OS=Rattus norvegicus GN=Aco2 PE=1 SV=2 - [ACON_RAT]	1730.83	0	0	4.00957e+07	1.33787e+08	1.45175e+08	0	0	0	0	135728590	0	146839047			36.43	46.61	63.23	50.22			48.97	50		35.28			0.00119443	0.000109136	2.28161e-06	4.65796e-05			5.89458e-05	4.75e-05		0.00142312			2	2	2	3			3
IVYGHLDDPANQEIER		Q9ER34	Aconitate hydratase, mitochondrial OS=Rattus norvegicus GN=Aco2 PE=1 SV=2 - [ACON_RAT]	1868.91	0	0	0	0	587605185	0	1.67482e+08	0	476984345	0	0	4.44938e+08			48.95	49.12	90.28		93.58		78.14		32.4	74.45			8.59615e-05	7.65385e-05	6.37542e-09		2.74082e-09		1.00517e-07		0.00374036	2.42272e-07			2	2	3		3		3
KFKLEAPDADELPR		Q9ER34	Aconitate hydratase, mitochondrial OS=Rattus norvegicus GN=Aco2 PE=1 SV=2 - [ACON_RAT]	1628.86	0	0	7.88755e+07	0	7.90367e+07	5.43294e+07	0	0	123498420	0	8.50197e+07	7.39666e+07			88.11	88.47	71.26	83.01	83.51		66.2		86.65	61.08			1.00442e-08	8.10727e-09	4.90051e-07	2.8252e-08	2.45111e-08		1.35534e-06		1.26519e-08	4.87394e-06			3	3	3	3	3		3
KGEKNTIVTSYNR		Q9ER34	Aconitate hydratase, mitochondrial OS=Rattus norvegicus GN=Aco2 PE=1 SV=2 - [ACON_RAT]	1509.8	0	0	0	0	1.35499e+08	4.06929e+07	3.37765e+07	58181184	1.3217e+08	4.81363e+07	33739998	4.061e+07	79.35		66.58	39.39	91.21	72.98	31.68	71.28	75.51	94.87	77.93	83.56	6.27182e-08		1.18684e-06	0.000540876	3.55711e-09	2.7189e-07	0.0036677	3.50024e-07	1.32159e-07	1.75952e-09	7.57003e-08	2.379e-08	3		3	2	2	2	2	2	2
LNRPLTLSEK		Q9ER34	Aconitate hydratase, mitochondrial OS=Rattus norvegicus GN=Aco2 PE=1 SV=2 - [ACON_RAT]	1170.68	5.23913e+07	2.15337e+07	6.46162e+08	4.44732e+08	4.25168e+08	3.13957e+08	517599264	0	0	2.20884e+08	4.19432e+08	3.25217e+08	36.68	34.17	32.55	31.86	34.52	33.28	32.54		37.24	43.2	34.84	32.59	0.000461784	0.000823073	0.00119519	0.001401	0.000759344	0.00101027	0.00119795		0.000405918	0.000100512	0.000705405	0.00118424	2	2	2	2	2	2	2		3
LRPDRVAMQDATAQMAMLQFISSGLPK		Q9ER34	Aconitate hydratase, mitochondrial OS=Rattus norvegicus GN=Aco2 PE=1 SV=2 - [ACON_RAT]	2975.53	0	0	0	148071374	3.57611e+08	5.11955e+07	0	0	3.86858e+07	0	7.4793e+07	0			35.35	60.13	49.52	35		49.55	43.08		31.53	58.26			0.00227559	7.37588e-06	8.71153e-05	0.00238752		8.76248e-05	0.00036903		0.00516758	1.12706e-05			3	4	4	4		3	4
NAVTQEFGPVPDTAR		Q9ER34	Aconitate hydratase, mitochondrial OS=Rattus norvegicus GN=Aco2 PE=1 SV=2 - [ACON_RAT]	1601.79	0	1.00399e+08	694360163	5.5144e+08	462838226	177985273	0	3.41012e+07	696206352	4.23406e+08	0	0		63.42	67.4	63.89	60.55	59.39		71.16	60.64	59.9				2.11569e-06	1.00084e-06	2.24576e-06	4.05282e-06	6.27186e-06		3.52174e-07	3.23617e-06	5.01414e-06				2	2	2	2	2		2	2
NFTGRNDANPETHAFVTSPEIVTALAIAGTLK	N6(Deamidated)	Q9ER34	Aconitate hydratase, mitochondrial OS=Rattus norvegicus GN=Aco2 PE=1 SV=2 - [ACON_RAT]	3356.73	0	0	0	0	56785966	0	0	0	0	5.4261e+07	5.82459e+07	5.82664e+07			36.03		39.56	30.45	40.01		39.55	58.68	35.28	47.39			0.00179611		0.000885299	0.00649131	0.000753264		0.000809698	1.0977e-05	0.00210503	0.000134968			4		3	4	4		4
NFTGRNDANPETHAFVTSPEIVTALAIAGTLK		Q9ER34	Aconitate hydratase, mitochondrial OS=Rattus norvegicus GN=Aco2 PE=1 SV=2 - [ACON_RAT]	3355.73	0	0	1.45428e+09	0	1.1493e+09	8.30745e+08	1008210312	0	0	655640092	9.16966e+08	4.47319e+08	36.74		55.68	46.95	46.68	62.03	44.02	40.09	48.6	58.55	41.11	62.92	0.0014193		1.96037e-05	0.000143304	0.000147126	4.44896e-06	0.000287302	0.000670951	9.45563e-05	9.8444e-06	0.000549868	3.65011e-06	4		3	4	3	3	3	4	4
NINIVR		Q9ER34	Aconitate hydratase, mitochondrial OS=Rattus norvegicus GN=Aco2 PE=1 SV=2 - [ACON_RAT]	728.442	0	0	1.30309e+08	82884578	1.00516e+08	8.9614e+07	1.36106e+08	0	1.69703e+08	7.22257e+07	5.6867e+07	5.67246e+07			31.14	31.26	31.3	31.08	31.42		31.52	31.08	30.91	31.2			0.00173054	0.00168338	0.00166795	0.00175462	0.00162249		0.00158556	0.00175462	0.00182466	0.0017068			2	2	2	2	2		2
NTIVTSYNR		Q9ER34	Aconitate hydratase, mitochondrial OS=Rattus norvegicus GN=Aco2 PE=1 SV=2 - [ACON_RAT]	1067.55	0	5.0225e+07	2.92588e+08	0	0	9.87063e+07	0	1.71854e+07	1.6799e+08	106666570	0	1.15213e+08		49.31	47.06			46.96		47.45	51.41	47.22		46.77		3.39937e-05	5.90366e-05			6.94735e-05		5.21673e-05	2.09603e-05	6.54364e-05		6.10096e-05		2	2			2		2	2
QALAHGLK		Q9ER34	Aconitate hydratase, mitochondrial OS=Rattus norvegicus GN=Aco2 PE=1 SV=2 - [ACON_RAT]	837.494	0	9.21363e+07	0	2.28017e+08	0	2.58216e+08	0	5.77415e+06	0	0	1.84392e+08	1.04583e+08		34.87		41.65		34.68		39.1			34.98	41.47		0.000325837		6.83912e-05		0.000340408		0.000123027			0.000317687	7.12853e-05		2		2		2		2
SQFTITPGSEQIR		Q9ER34	Aconitate hydratase, mitochondrial OS=Rattus norvegicus GN=Aco2 PE=1 SV=2 - [ACON_RAT]	1463.75	1.59983e+08	7.9723e+07	704756403	0	0	5.44021e+08	7.25295e+08	2.19329e+07	764799094	405703455	4.87817e+08	3.91182e+08	60.52	80.44	62.48		61.24	60.48	59.77	84.27	61.2	61.49	71.65	52.54	5.36729e-06	5.46708e-08	3.53086e-06		4.77281e-06	6.04371e-06	7.11711e-06	2.52525e-08	4.62732e-06	4.57678e-06	4.47962e-07	3.92816e-05	2	2	2		2	2	2	2	2
VAMQDATAQMAMLQFISSGLPK	M3(Oxidation)	Q9ER34	Aconitate hydratase, mitochondrial OS=Rattus norvegicus GN=Aco2 PE=1 SV=2 - [ACON_RAT]	2354.16	0	0	0	4.9506e+07	25050409	0	0	0	5.20401e+07	0	5.01517e+07	1.02454e+07				43.11	32.77	36.07	52.35		33.86	45.86	34.55	41.72				0.000354273	0.00385765	0.00176728	4.30756e-05		0.00304251	0.000189375	0.00254295	0.000518192				2	2	2	3		2
VAMQDATAQMAMLQFISSGLPK		Q9ER34	Aconitate hydratase, mitochondrial OS=Rattus norvegicus GN=Aco2 PE=1 SV=2 - [ACON_RAT]	2338.16	0	0	0	142128482	0	7.77076e+07	2.62545e+08	5.34127e+07	801866484	0	0	0				55.89		87.57	36.11	36.13	58.42							2.2414e-05		1.58361e-08	0.00231436	0.00224279	1.33808e-05							3		3	3	3	3
VAMSHFEPSEYIR		Q9ER34	Aconitate hydratase, mitochondrial OS=Rattus norvegicus GN=Aco2 PE=1 SV=2 - [ACON_RAT]	1565.74	6.47094e+07	0	6.65669e+08	374926600	266868292	257619648	0	0	0	0	0	3.73563e+08	37.6		65.32	63.41	58.21	53.66	55.23		60.94	65.27	30.97	50.05	0.000634297		1.05755e-06	1.75574e-06	5.88931e-06	1.46379e-05	1.0797e-05		3.26178e-06	1.01037e-06	0.0029194	4.00364e-05	3		3	3	3	3	2		2
VAVPSTIHCDHLIEAQLGGEK	C9(Methylthio)	Q9ER34	Aconitate hydratase, mitochondrial OS=Rattus norvegicus GN=Aco2 PE=1 SV=2 - [ACON_RAT]	2263.12	0	0	178274069	0	1.21159e+08	1.09784e+08	4.5433e+08	81107880	0	0	0	8559499			54.48		44.47	37.82	55.94	50.04				63.91			2.63774e-05		0.000285818	0.00128027	1.99926e-05	7.9762e-05				3.17026e-06			3		3	3	3	3
VAVPSTIHCDHLIEAQLGGEKDLR	C9(Methylthio)	Q9ER34	Aconitate hydratase, mitochondrial OS=Rattus norvegicus GN=Aco2 PE=1 SV=2 - [ACON_RAT]	2647.33	0	0	334555760	332956026	3.70737e+08	0	4.11777e+08	198204205	322592534	2.14821e+08	3.87978e+08	3.27111e+08			60.82	42.48	30.43		56.06	45.22	37.96	48.97	40.58	51.64			7.07891e-06	0.00048867	0.00792516		2.1182e-05	0.000248001	0.00136762	0.000113455	0.000778736	5.86092e-05			3	3	3		3	3	3
VDVSPTSQR		Q9ER34	Aconitate hydratase, mitochondrial OS=Rattus norvegicus GN=Aco2 PE=1 SV=2 - [ACON_RAT]	988.506	0	2.14478e+07	0	1.04264e+08	9.65155e+07	1.91257e+08	3.45505e+08	3.25651e+06	3.08224e+08	1.03769e+08	9.01943e+07	0		85.16		61.62	75.34	72.4	66.43	66.95	76.78	76.2	67.75			1.56967e-08		3.54656e-06	1.50594e-07	3.04983e-07	1.18305e-06	1.03946e-06	1.08095e-07	1.2354e-07	8.64584e-07			2		2	2	2	2	2	2
VGLIGSCTNSSYEDMGR	C7(Methylthio); M15(Oxidation)	Q9ER34	Aconitate hydratase, mitochondrial OS=Rattus norvegicus GN=Aco2 PE=1 SV=2 - [ACON_RAT]	1850.77	0	0	0	0	2.47041e+07	0	0	2.643e+07	0	0	0	1.55688e+07					108.89			114.11				108.7					1.35578e-11			3.87231e-12				1.34577e-11					2			2
VGLIGSCTNSSYEDMGR	C7(Methylthio); N9(Deamidated)	Q9ER34	Aconitate hydratase, mitochondrial OS=Rattus norvegicus GN=Aco2 PE=1 SV=2 - [ACON_RAT]	1835.76	0	739654	121209768	8.31412e+07	1.1503e+08	9.63683e+07	0	8663727	9.33196e+07	6.36961e+07	8.26032e+07	1.13804e+08		112.33	121.3	127.37	121.06	99.92		134.91	113.23	113.18	135.35	135.3		7.01748e-12	7.78376e-13	2.01555e-13	8.61773e-13	1.06952e-10		3.55134e-14	4.99102e-12	5.28923e-12	3.20917e-14	3.09877e-14		2	2	2	2	2		2	2
VGLIGSCTNSSYEDMGR	C7(Methylthio)	Q9ER34	Aconitate hydratase, mitochondrial OS=Rattus norvegicus GN=Aco2 PE=1 SV=2 - [ACON_RAT]	1834.78	1.66212e+08	0	3.84788e+08	2.25927e+08	3.11084e+08	274346671	3.39968e+08	393820547	2.32955e+08	2.86678e+08	2.55212e+08	261520657	74.64	100.09	128.07	113.73	150.08	142.38	121.13	150.36	113.66	127.94	127.63	135.74	4.80981e-08	1.46923e-10	2.41731e-13	5.08372e-12	1.47262e-15	8.09334e-15	1.07926e-12	1.28863e-15	6.02737e-12	2.24972e-13	2.50246e-13	4.26697e-14	2	2	2	2	2	2	2	2	2
AGFAGDDAPR		P60711	Actin, cytoplasmic 1 OS=Rattus norvegicus GN=Actb PE=1 SV=1 - [ACTB_RAT]	976.448	0	3.60606e+08	494093423	7.27011e+08	0	3.22684e+09	1.21908e+09	3.65052e+07	1091218450	1111698344	5.47844e+08	5.54067e+08		90.42	87.11	102.88		87.03	87.65	84.13	102.86	84.1	84.58	90.36		2.0426e-09	4.37706e-09	1.15926e-10		4.45844e-09	3.86529e-09	8.69326e-09	1.16462e-10	8.75352e-09	7.83759e-09	2.07101e-09		2	2	2		2	2	2	2
AVFPSIVGRPR		P60711	Actin, cytoplasmic 1 OS=Rattus norvegicus GN=Actb PE=1 SV=1 - [ACTB_RAT]	1198.7	1877803419	1.49569e+07	7873750644	5.86896e+09	0	6.0593e+09	0	0	6760691623	4567019646	6594148842	5.56021e+09	38.98	44.37	47.25	48.74	37.25	55.06	39.23	35.64	43.36	47.73	44.21	52.3	0.000278242	8.04309e-05	4.14403e-05	2.94051e-05	0.000404985	7.0175e-06	0.000376106	0.000600375	0.00010149	3.79474e-05	8.72424e-05	1.23657e-05	2	2	2	2	3	2	3	3	2
CDVDIR	C1(Methylthio)	P60711	Actin, cytoplasmic 1 OS=Rattus norvegicus GN=Actb PE=1 SV=1 - [ACTB_RAT]	766.321	0	9711162	0	0	0	0	40196264	0	3.75308e+07	1.94887e+07	0	0		56.36					32.56		36.71	35.41				3.35249e-06					0.000804207		0.000319957	0.000417223				2					2		2
CDVDIRKDLYANTVLSGGTTMYPGIADR	C1(Methylthio)	P60711	Actin, cytoplasmic 1 OS=Rattus norvegicus GN=Actb PE=1 SV=1 - [ACTB_RAT]	3090.47	0	0	0	8.97529e+07	1.00421e+08	1.03814e+08	9.08298e+07	1.92654e+08	0	80704032	0	1.15026e+08				42.59	76.05	75.54	93.76	94.06		93.4		61.84				0.0004434	2.02375e-07	2.248e-07	3.28167e-09	3.10189e-09		3.54243e-09		5.49894e-06				3	3	3	3	3
DLYANTVLSGGTTMYPGIADR		P60711	Actin, cytoplasmic 1 OS=Rattus norvegicus GN=Actb PE=1 SV=1 - [ACTB_RAT]	2215.07	0	0	68736438	6.30081e+07	28954685	48874396	1.15597e+08	0	96496698	52034291	38628498	43441999			48.6	51.57	31.06	60.53	55.66		56.2	90.13	66.11	33.11			8.55838e-05	4.31908e-05	0.00485726	5.88602e-06	1.95584e-05		1.58323e-05	6.55094e-09	1.66536e-06	0.00334727			2	2	2	2	2		2
DSYVGDEAQSK		P60711	Actin, cytoplasmic 1 OS=Rattus norvegicus GN=Actb PE=1 SV=1 - [ACTB_RAT]	1198.52	0	1.5516e+07	0	0	0	6.5177e+07	0	8.12675e+06	0	37602134	2.29591e+07	0		37.39				47.45		48.08		44.23	46.15			0.000273584				2.78825e-05		2.33395e-05		5.66358e-05	3.63992e-05			2				2		2
DSYVGDEAQSKR		P60711	Actin, cytoplasmic 1 OS=Rattus norvegicus GN=Actb PE=1 SV=1 - [ACTB_RAT]	1354.62	0	0	102245004	0	0	2.64727e+08	8.35689e+07	0	0	1.05876e+08	1.14702e+08	5.55836e+07			33.25			42.2	65.2			30.56	68.34	60			0.00175066			0.000222947	9.96584e-07			0.00320843	4.83631e-07	3.35e-06			2			2	2
EITALAPSTMK		P60711	Actin, cytoplasmic 1 OS=Rattus norvegicus GN=Actb PE=1 SV=1 - [ACTB_RAT]	1161.62	0	0	520453592	0	2.88738e+08	0	0	0	0	17790371	0	283070448		62.04	65.24		61.19					50.47		64.35		3.46971e-06	1.49613e-06		4.79006e-06					4.98073e-05		1.98332e-06		2	2		2
HQGVMVGMGQK	M5(Oxidation); M8(Oxidation)	P60711	Actin, cytoplasmic 1 OS=Rattus norvegicus GN=Actb PE=1 SV=1 - [ACTB_RAT]	1203.56	1.32128e+06	1.88148e+07	0	2.75753e+07	1.61964e+07	3.61742e+07	4.20587e+07	0	0	4.81863e+07	0	3.38679e+07	39.64	50.52		60.89	38.1	50.4	46.01			37.92		48.4	0.000342224	2.79454e-05		2.56632e-06	0.000487877	2.87283e-05	7.89424e-05			0.000508523		4.55314e-05	2	2		2	2	2	2
HQGVMVGMGQK	M8(Oxidation)	P60711	Actin, cytoplasmic 1 OS=Rattus norvegicus GN=Actb PE=1 SV=1 - [ACTB_RAT]	1187.57	0	8.3372e+07	456621782	1.84474e+08	2.28261e+08	0	2.66377e+08	1.21943e+07	3.76075e+08	138206210	1.70021e+08	1.45459e+08		50.59	46.99	50.49	48.8		50.87	40.57	50.28	48.45	54.55	56.13		2.9681e-05	6.79953e-05	3.03724e-05	4.48207e-05		2.78278e-05	0.00029818	3.18771e-05	4.85824e-05	1.19256e-05	8.28856e-06		2	2	2	2		2	2	2
HQGVMVGMGQK		P60711	Actin, cytoplasmic 1 OS=Rattus norvegicus GN=Actb PE=1 SV=1 - [ACTB_RAT]	1171.57	0	1.96934e+08	1.7229e+09	827399104	902410983	7.4305e+08	1.07703e+09	8.06056e+07	1079146744	5.89672e+08	7.31897e+08	8.79806e+08		54.23	44.42	47.74	52.39	50.93	50.76	50.93	48.42	50.65	50.78	47.24		1.1516e-05	8.85454e-05	5.13216e-05	1.75914e-05	1.97773e-05	2.56035e-05	2.46207e-05	4.38834e-05	2.62603e-05	2.04723e-05	5.75837e-05		2	2	2	2	2	2	2	2
HQGVMVGMGQKDSYVGDEAQSK		P60711	Actin, cytoplasmic 1 OS=Rattus norvegicus GN=Actb PE=1 SV=1 - [ACTB_RAT]	2351.07	0	0	1.68124e+08	1.3243e+08	2.76837e+08	1.68309e+08	8.86763e+07	2.5846e+08	100849958	113281803	103388911	158488914			83.64	106.9	88.52	69.96	79.34	91.8	80.34	94.22	100.3	74.07			2.2707e-08	1.08212e-10	7.52235e-09	5.50043e-07	6.34449e-08	3.53471e-09	5.03961e-08	2.06251e-09	5.17956e-10	2.03706e-07			3	3	3	3	3	3	3
HQGVMVGMGQKDSYVGDEAQSK	M5(Oxidation)	P60711	Actin, cytoplasmic 1 OS=Rattus norvegicus GN=Actb PE=1 SV=1 - [ACTB_RAT]	2367.07	0	3.38318e+06	89312132	7.55001e+07	1.46935e+08	9.11022e+07	72311744	9.33522e+07	6.63871e+07	7.69681e+07	5.17524e+07	9.6953e+07		42.01	74.46	108.28	93.7	93.16	91.96	100.37	75.3	88.38	49.49	76.01		0.000299015	1.71886e-07	6.9096e-11	2.17556e-09	2.24622e-09	3.02478e-09	4.408e-10	1.40182e-07	6.89753e-09	5.28564e-05	1.20293e-07		3	3	3	3	3	3	3	3
HQGVMVGMGQKDSYVGDEAQSK	M5(Oxidation); M8(Oxidation)	P60711	Actin, cytoplasmic 1 OS=Rattus norvegicus GN=Actb PE=1 SV=1 - [ACTB_RAT]	2383.06	0	7.37022e+06	3.20203e+07	3.98842e+07	86091716	51829242	4.27101e+07	4.45822e+07	5.7195e+07	5.31552e+07	2.73582e+07	5.69149e+07		72.1	44.81	68.92	53.92	67.59	52.45	73.87	60.45	76.77	30.45	70.83		2.86717e-07	0.000145363	5.57814e-07	1.86534e-05	8.01231e-07	2.58828e-05	1.86643e-07	4.01199e-06	9.78257e-08	0.00419231	3.75847e-07		3	3	3	3	3	3	3	3
HQGVMVGMGQKDSYVGDEAQSKR		P60711	Actin, cytoplasmic 1 OS=Rattus norvegicus GN=Actb PE=1 SV=1 - [ACTB_RAT]	2507.17	64042785	0	3.31863e+08	1.68637e+08	0	2.72052e+08	0	0	1.32924e+08	0	2.43054e+08	2.02055e+08	63.15		57.68	43.35	67.23	33.36	51.3	76.19	42.38	83.44	50.15	65.07	3.63129e-06		1.29662e-05	0.000346786	1.41926e-06	0.00359828	5.55983e-05	1.82732e-07	0.000476929	3.41938e-08	8.25974e-05	2.3649e-06	4		4	4	3	4	3	3	4
HQGVMVGMGQKDSYVGDEAQSKR	M5(Oxidation)	P60711	Actin, cytoplasmic 1 OS=Rattus norvegicus GN=Actb PE=1 SV=1 - [ACTB_RAT]	2523.17	2.20683e+07	0	0	8.23761e+07	169456107	0	4.63619e+07	1.00213e+08	0	1.10052e+08	1.29828e+08	1.27711e+08	69.46		47.29	47.42	52.3	66.47	48.96	61.81	50.98	60.87	51.56	44.21	6.7944e-07		0.000113849	0.000101435	3.35641e-05	1.27365e-06	7.17874e-05	3.85617e-06	4.46877e-05	4.78802e-06	3.97992e-05	0.00021621	4		3	4	4	3	4	4	3
HQGVMVGMGQKDSYVGDEAQSKR	M5(Oxidation); M8(Oxidation)	P60711	Actin, cytoplasmic 1 OS=Rattus norvegicus GN=Actb PE=1 SV=1 - [ACTB_RAT]	2539.17	3.12262e+07	0	9.94615e+07	5.98457e+07	1.14527e+08	9.25333e+07	0	7.7813e+07	9.8708e+07	9.41826e+07	9.61573e+07	1.18823e+08	55.09		43.7	48.18	52.57	49.29		35.9	42.75	58.89	51.4	40.74	1.37835e-05		0.000185562	6.76644e-05	2.40707e-05	5.06371e-05		0.00114383	0.000230935	5.6168e-06	3.22374e-05	0.000366851	4		4	4	4	4		4	4
IIAPPER		P60711	Actin, cytoplasmic 1 OS=Rattus norvegicus GN=Actb PE=1 SV=1 - [ACTB_RAT]	795.472	0	0	1.69964e+07	1.9807e+07	1.72319e+07	2.22645e+07	4.16957e+07	0	4.29612e+07	1.0733e+07	0	0			49.78	49.66	49.93	49.78	46.14		50	31.15					1.15716e-05	1.18958e-05	1.11787e-05	1.15716e-05	2.67542e-05		1.1e-05	0.000844098					2	2	2	2	2		2
IKIIAPPER		P60711	Actin, cytoplasmic 1 OS=Rattus norvegicus GN=Actb PE=1 SV=1 - [ACTB_RAT]	1036.65	0	0	0	44806180	3.90616e+07	4.37668e+07	4.463e+07	0	0	19774942	0	2.50579e+07				40.02	55.24	51.04	49.44			46.57		49.08				9.93047e-05	2.98518e-06	7.85181e-06	1.13493e-05			2.19771e-05		1.23302e-05				2	2	2	2
IKIIAPPERK		P60711	Actin, cytoplasmic 1 OS=Rattus norvegicus GN=Actb PE=1 SV=1 - [ACTB_RAT]	1164.75	0	0	52031395	3.41513e+07	0	0	36150585	0	0	0	0	1.47253e+07			34.26	35.05			32.88					42.22			0.000374085	0.000311867			0.000514008					5.9837e-05			3	3			3
IWHHTFYNELR		P60711	Actin, cytoplasmic 1 OS=Rattus norvegicus GN=Actb PE=1 SV=1 - [ACTB_RAT]	1515.75	0	0	0	271678685	164258349	8.16015e+07	0	0	0	0	362788976	0				42.64	41.93	39.61		58.08	45.38		44.02					0.000264084	0.000310987	0.000530569		7.07964e-06	0.000137624		0.000192195					3	3	3		2	2
KDLYANTVLSGGTTMYPGIADR		P60711	Actin, cytoplasmic 1 OS=Rattus norvegicus GN=Actb PE=1 SV=1 - [ACTB_RAT]	2343.16	0	0	0	7.67368e+07	0	0	0	0	7.45501e+07	58460021	6.49335e+07	0			48.32	46.11		49.22	56.88	48.73	39.74	41.65	38.87				0.000125147	0.00020817		9.87311e-05	1.75374e-05	0.000113873	0.00090775	0.000581325	0.00101829				3	2		3	3	3	2
MQKEITALAPSTMK	M1(Oxidation)	P60711	Actin, cytoplasmic 1 OS=Rattus norvegicus GN=Actb PE=1 SV=1 - [ACTB_RAT]	1564.8	0	9.90969e+06	74253476	4.17978e+07	96519299	56328970	3.31795e+07	0	0	3.69008e+07	66244845	5.11084e+07		58.73	75.48	73.93	62.15	82.25	60.08	32.13		65.47	75	62.18		7.97108e-06	1.78378e-07	2.387e-07	3.59627e-06	3.75267e-08	5.79231e-06	0.00370472		1.68856e-06	1.86574e-07	3.60178e-06		2	2	2	2	2	2	3
MQKEITALAPSTMK		P60711	Actin, cytoplasmic 1 OS=Rattus norvegicus GN=Actb PE=1 SV=1 - [ACTB_RAT]	1548.81	0	16023649	1860975091	8.91417e+08	8.39527e+08	0	717063334	5.96946e+07	876811297	6.7746e+08	7.69738e+08	8.51168e+08	52.6	69.48	78.24	81.21	65.39		76.56	80.69	83.56	81.14	75.11	78.64	3.84679e-05	6.70682e-07	8.92312e-08	4.50316e-08	1.79222e-06		1.36896e-07	5.07595e-08	2.73144e-08	4.57633e-08	1.91158e-07	8.47992e-08	3	2	2	2	2		2	2	2
RGILTLK		P60711	Actin, cytoplasmic 1 OS=Rattus norvegicus GN=Actb PE=1 SV=1 - [ACTB_RAT]	800.535	7.86469e+07	0	0	414099854	0	0	6.67404e+08	0	0	0	0	0	32.57			30.52			30.64						0.00066402			0.00106459			0.00103557						2			2			2
SYELPDGQVITIGNER		P60711	Actin, cytoplasmic 1 OS=Rattus norvegicus GN=Actb PE=1 SV=1 - [ACTB_RAT]	1790.89	3.37393e+08	0	720892987	5.66549e+08	495425688	7.04333e+08	6.06162e+08	3.03976e+07	8.22474e+08	3.83735e+08	384358100	4.00997e+08	59.96	85.87	85.13	99.33	85.88	86.21	99.28	74.09	85.89	86.45	92.34	79.83	6.86292e-06	1.75998e-08	1.734e-08	7.93431e-10	1.57518e-08	1.62745e-08	8.02618e-10	2.65161e-07	1.7519e-08	1.4607e-08	3.52984e-09	7.01946e-08	2	2	2	2	2	2	2	2	2
VAPEEHPVLLTEAPLNPK		P60711	Actin, cytoplasmic 1 OS=Rattus norvegicus GN=Actb PE=1 SV=1 - [ACTB_RAT]	1954.06	0	0	1.50163e+09	0	2896723018	1.37118e+09	0	3.34912e+07	0	589770480	1106261605	0	34.67	41.79	32.7	40.07	39.43	44.58	42.41	33.62	40.17	37.58	33.75	39	0.00131359	0.000281442	0.00201387	0.000437885	0.000450399	0.000148043	0.000243999	0.00162941	0.000408685	0.000916557	0.00158136	0.000547633	3	3	2	3	2	2	3	2	3
GLAPEQPVTLR		O55171	Acyl-coenzyme A thioesterase 2, mitochondrial OS=Rattus norvegicus GN=Acot2 PE=1 SV=1 - [ACOT2_RAT]	1180.67	0	0	7.69029e+07	0	8.22592e+07	0	0	0	9.12014e+07	0	0	40233587			43.36		74.15				78.72			58.77			0.000110716		6.53806e-08				2.61839e-08			3.98218e-06			2		2				2
HFMAPGVR		O55171	Acyl-coenzyme A thioesterase 2, mitochondrial OS=Rattus norvegicus GN=Acot2 PE=1 SV=1 - [ACOT2_RAT]	914.466	0	0	1.30437e+08	8.23766e+07	0	8.69694e+07	9.13264e+07	0	0	0	0	0			30.39	31.77		31.86	31.92								0.00214817	0.00196256		0.0019223	0.00151032								2	2		2	2
MTKDGLLDVVEALQSPLVDKK		O55171	Acyl-coenzyme A thioesterase 2, mitochondrial OS=Rattus norvegicus GN=Acot2 PE=1 SV=1 - [ACOT2_RAT]	2299.26	0	0	8.29559e+07	0	0	3.26611e+07	4.12038e+07	0	5.0151e+07	2.73831e+07	4.53068e+07	0			56.81			76.95	72.39		72.83	69.71	59.06				1.08394e-05			8.88081e-08	2.56661e-07		2.31932e-07	4.81075e-07	5.58744e-06				3			3	3		3
SCWDEPLSITVR	C2(Methylthio)	O55171	Acyl-coenzyme A thioesterase 2, mitochondrial OS=Rattus norvegicus GN=Acot2 PE=1 SV=1 - [ACOT2_RAT]	1451.66	0	0	0	4.90164e+07	0	5.40917e+07	0	0	3.76319e+07	43886938	4.06038e+07	2.56441e+07				78.67		38.01			70.95	78.71	62.3	64.92				5.29742e-08		0.000616687			2.89269e-07	4.8451e-08	2.17872e-06	1.30453e-06				2		2			2
DFLAGGIAAAVSK		Q05962	ADP/ATP translocase 1 OS=Rattus norvegicus GN=Slc25a4 PE=1 SV=3 - [ADT1_RAT]	1219.67	0	0	0	0	0	13597512	5.52789e+07	0	15214424	0	0	0						39.63	58.68		35.2		47.83							0.000544465	6.50491e-06		0.00150998		7.99359e-05							2	2		2
KGADIMYTGTVDCWR	C13(Methylthio)	Q05962	ADP/ATP translocase 1 OS=Rattus norvegicus GN=Slc25a4 PE=1 SV=3 - [ADT1_RAT]	1761.78	0	0	0	3.73298e+07	0	3.45265e+07	0	1.52075e+08	5.60828e+07	0	0	0			53.41	53.17		55.09	41.73	75.77	62.03			65.24			9.57678e-06	1.30126e-05		7.58868e-06	0.000167857	7.15095e-08	1.66053e-06			8.82718e-07			2	3		3	2	3	3
KGADIMYTGTVDCWRK	C13(Methylthio)	Q05962	ADP/ATP translocase 1 OS=Rattus norvegicus GN=Slc25a4 PE=1 SV=3 - [ADT1_RAT]	1889.87	0	0	0	86929104	85775750	5.64206e+07	1.15629e+08	0	9.60293e+07	7.59739e+07	1.05772e+08	1.39629e+08				53.76	44.81	58.51	43.91		44.71	44.8	47.74	51.59				1.78809e-05	0.000142059	6.05994e-06	0.000176803		0.000145368	0.000135764	6.9831e-05	2.84305e-05				3	3	3	3		3
LAADVGKGSSQR		Q05962	ADP/ATP translocase 1 OS=Rattus norvegicus GN=Slc25a4 PE=1 SV=3 - [ADT1_RAT]	1188.63	5.09629e+06	1.4216e+07	0	7.13625e+07	7.63884e+07	9.69712e+07	1.40973e+08	0	1.92773e+08	7.35479e+07	8.05758e+07	4.86629e+07	76.34	87.36		89.55	67.68	61.7	66.99		38.35	93.39	37.21	57.75	1.38203e-07	1.09274e-08		6.48867e-09	7.76267e-07	3.95509e-06	1.16992e-06		0.000899239	2.68013e-09	0.00113114	9.821e-06	2	2		2	2	2	2		2
KGTDIMYTGTLDCWR	C13(Methylthio)	Q09073	ADP/ATP translocase 2 OS=Rattus norvegicus GN=Slc25a5 PE=1 SV=3 - [ADT2_RAT]	1805.8	0	0	3.2672e+07	2.76572e+07	2.8786e+07	18808345	44883836	0	4.39463e+07	0	4.89443e+07	5.09462e+07			61.74	45.11	56.76	30.73	48.09	79.45	47.25	67.49	61.59	40.62			1.94267e-06	9.40372e-05	6.22045e-06	0.00266263	4.50192e-05	3.51853e-08	5.46258e-05	5.52537e-07	2.11495e-06	0.000268758			2	2	2	2	2	3	2
KGTDIMYTGTLDCWRK	C13(Methylthio)	Q09073	ADP/ATP translocase 2 OS=Rattus norvegicus GN=Slc25a5 PE=1 SV=3 - [ADT2_RAT]	1933.9	0	0	0	7.48361e+07	7.14371e+07	0	0	1.68577e+08	0	5.28639e+07	7.65308e+07	126072357				55.42	37.93			61.17		54.54	46.94	46.73				8.03819e-06	0.00054762			2.48247e-06		1.58202e-05	5.66445e-05	7.32519e-05				3	3			3
LAADVGKAGAER		Q09073	ADP/ATP translocase 2 OS=Rattus norvegicus GN=Slc25a5 PE=1 SV=3 - [ADT2_RAT]	1157.63	4.50016e+06	6.13372e+06	0	0	0	0	0	586002	0	0	0	0	66.52	72.18						60.75					8.6909e-07	2.36083e-07						3.28144e-06					2	2						2
GFFIKPTVFGNVQDDMR	N11(Deamidated)	Q66HF8	Aldehyde dehydrogenase X, mitochondrial OS=Rattus norvegicus GN=Aldh1b1 PE=1 SV=1 - [AL1B1_RAT]	1971.96	0	0	0	0	4.43725e+07	0	0	0	7.62825e+07	0	6.24824e+07	5.34951e+07			72.41	72.14	66.14	71.09	43.27		78.72		78.41	78.71			3.53082e-07	3.48237e-07	1.56877e-06	4.70712e-07	0.000273167		7.98945e-08		9.37375e-08	8.47892e-08			3	3	2	3	3		2
IAREEIFGPVQPLFK		Q66HF8	Aldehyde dehydrogenase X, mitochondrial OS=Rattus norvegicus GN=Aldh1b1 PE=1 SV=1 - [AL1B1_RAT]	1743.97	0	0	17870384	3.06272e+07	0	1.08333e+07	0	0	0	0	0	0			55.49	37.97		43.36			30.75						1.1582e-05	0.000542599		0.000152235			0.00311316						3	3		3			2
LAPALATGNTVVMK		Q66HF8	Aldehyde dehydrogenase X, mitochondrial OS=Rattus norvegicus GN=Aldh1b1 PE=1 SV=1 - [AL1B1_RAT]	1385.78	0	0	0	0	0	1.39283e+07	4.75261e+07	0	0	0	22522272	0						47.88	60.82				45.27							8.63527e-05	4.09831e-06				0.000105494							2	2
LGSPWR		Q66HF8	Aldehyde dehydrogenase X, mitochondrial OS=Rattus norvegicus GN=Aldh1b1 PE=1 SV=1 - [AL1B1_RAT]	715.389	0	5.4722e+06	29301542	2.31389e+07	0	0	3.09609e+07	0	24835476	0	2.09963e+07	1.87836e+07		40.97	41.42	41			41.31		41.42		41	40.93		0.000147969	0.000133405	0.000127093			0.000136827		0.000133405		0.000146951	0.000149338		2	2	2			2		2
TFPTVNPTTGEVIGHVAEGDRADVDLAVR		Q66HF8	Aldehyde dehydrogenase X, mitochondrial OS=Rattus norvegicus GN=Aldh1b1 PE=1 SV=1 - [AL1B1_RAT]	3036.54	0	0	0	0	3.86273e+07	4.09951e+07	3.03724e+07	13056243	0	3.23767e+07	3.04903e+07	0					32.88	44.65	43.38	35.03		43.07	46.36						0.00471434	0.000305063	0.000408686	0.00276365		0.000424129	0.000198838						3	3	3	3
TFVEESIYHEFLER		Q66HF8	Aldehyde dehydrogenase X, mitochondrial OS=Rattus norvegicus GN=Aldh1b1 PE=1 SV=1 - [AL1B1_RAT]	1798.86	0	0	0	3.2108e+07	5.9584e+07	4.59341e+07	0	0	5.62366e+07	0	0	0				47.47	78.77	57.62			86.65							0.000101169	7.56615e-08	9.16803e-06			1.17868e-08							2	2	2			2
YNQLFINNEWHDAVSKK		Q66HF8	Aldehyde dehydrogenase X, mitochondrial OS=Rattus norvegicus GN=Aldh1b1 PE=1 SV=1 - [AL1B1_RAT]	2106.04	0	0	0	3.89446e+07	0	0	0	4.15497e+07	2.85885e+07	0	0	0				42.39				42.48	33.08							0.000400853				0.000415229	0.00346888							3				3	3
KTFPTVNPSTGEVICQVAEGNKEDVDKAVK	C15(Methylthio)	P11884	Aldehyde dehydrogenase, mitochondrial OS=Rattus norvegicus GN=Aldh2 PE=1 SV=1 - [ALDH2_RAT]	3249.61	0	0	2.92735e+08	1.7063e+08	0	147471177	136327175	0	1.71564e+08	1.47232e+08	145654325	1.4805e+08			32.85	34.17		39.58	33.91		38.86	46.1	45.53	38.02			0.00500642	0.00354113		0.00108502	0.00400347		0.00125466	0.000225833	0.000265903	0.00147507			4	4		4	4		4
LLCGGGAAADR	C3(Methylthio)	P11884	Aldehyde dehydrogenase, mitochondrial OS=Rattus norvegicus GN=Aldh2 PE=1 SV=1 - [ALDH2_RAT]	1049.49	0	0	0	0	0	0	4.72176e+07	0	4.48297e+07	0	30221635	27702511							77.48		64.9		61.7	61.89							5.00217e-08		6.63367e-07		2.02825e-06	1.87671e-06							2		2
TFVQEDVYDEFVER		P11884	Aldehyde dehydrogenase, mitochondrial OS=Rattus norvegicus GN=Aldh2 PE=1 SV=1 - [ALDH2_RAT]	1775.81	0	0	0	0	0	0	5.8285e+07	5.84302e+07	0	3.5106e+07	0	0							69.29	76.25		74.14									4.35714e-07	8.77408e-08		1.42627e-07									2	2
VVGNPFDSRTEQGPQVDETQFK		P11884	Aldehyde dehydrogenase, mitochondrial OS=Rattus norvegicus GN=Aldh2 PE=1 SV=1 - [ALDH2_RAT]	2478.18	0	0	8.73357e+07	3.24866e+07	7.29433e+07	63158638	0	0	5.00615e+07	0	0	0			35.86	39.95	43.51	48.25			35.74						0.00186781	0.000743511	0.000354297	0.000104736			0.00192014						3	3	3	3			3
VVGNPFDSRTEQGPQVDETQFKK		P11884	Aldehyde dehydrogenase, mitochondrial OS=Rattus norvegicus GN=Aldh2 PE=1 SV=1 - [ALDH2_RAT]	2606.28	0	0	0	9.90604e+07	0	0	0	0	0	6.58277e+07	9.04609e+07	72351562				37.84						39.72	48.66	43.29				0.0015046						0.000949271	0.000125253	0.000454749				3
AAVVTSPPPTTAPHKER		Q63028	Alpha-adducin OS=Rattus norvegicus GN=Add1 PE=1 SV=2 - [ADDA_RAT]	1758.95	0	0	0	0	8.4518e+07	5.36692e+07	4.85508e+07	0	6.23198e+07	0	4.31908e+07	0			59.41		42.86	36.02	45.59		49.04	39.34	30.53				7.0449e-06		0.000297624	0.00140019	0.000169776		7.79615e-05	0.000663552	0.00553197				2		3	3	3		3
TAGPQSQVLCGVMMDR	C10(Methylthio)	Q63028	Alpha-adducin OS=Rattus norvegicus GN=Add1 PE=1 SV=2 - [ADDA_RAT]	1738.77	0	0	8.65589e+07	0	4.94542e+07	4.54015e+07	6.10894e+07	3.87003e+07	0	46824972	5.19205e+07	5.57874e+07			96.18		75.51	65.37	71	70.19		101.21	96.53	95.28			6.62724e-10		8.29511e-08	7.98606e-07	2.34327e-07	2.87158e-07		2.08129e-10	6.55876e-10	8.74625e-10			2		2	2	2	2
AGFAGDQIPK		P85515	Alpha-centractin OS=Rattus norvegicus GN=Actr1a PE=1 SV=1 - [ACTZ_RAT]	1003.52	0	2.45487e+07	0	64354111	8.02516e+07	0	0	0	0	0	0	0		41.1		32.98	31.41									0.000306618		0.00254268	0.00307177									2		2	2
VMAGALEGDIFIGPK		P85515	Alpha-centractin OS=Rattus norvegicus GN=Actr1a PE=1 SV=1 - [ACTZ_RAT]	1517.8	0	0	1.94972e+07	32669714	1.79357e+07	2.87124e+07	39554462	0	0	0	0	0			43.93	51.55	32.47	51.6	63.66								0.000228585	4.37401e-05	0.003539	4.32394e-05	2.43248e-06								2	2	2	2	2
YCFPNYVGRPK	C2(Methylthio)	P85515	Alpha-centractin OS=Rattus norvegicus GN=Actr1a PE=1 SV=1 - [ACTZ_RAT]	1389.64	0	0	0	1.28453e+08	66913054	0	109262348	0	1.13122e+08	0	1.08427e+08	92398165			32.26	39.02	55.17		39.39		38.66		39.08	55.31			0.00166402	0.000332082	8.05835e-06		0.000339486		0.000394819		0.000383144	7.80272e-06			3	2	2		2		2
TKEGVLYVGSK		P37377	Alpha-synuclein OS=Rattus norvegicus GN=Snca PE=1 SV=1 - [SYUA_RAT]	1180.65	28744500	0	101693550	0	0	0	4.95893e+07	0	46783964	0	0	0	59.72		43.15				50.1		36.58				3.46644e-06		0.000118622				2.39423e-05		0.000538476				2		2				2		2
TKEGVVHGVTTVAEK		P37377	Alpha-synuclein OS=Rattus norvegicus GN=Snca PE=1 SV=1 - [SYUA_RAT]	1554.85	1.31323e+07	0	0	0	0	0	0	2.38362e+07	0	3.4466e+07	0	0	55.38							50.5		37.45	33.99	36.31	1.33278e-05							3.83238e-05		0.000791503	0.00171581	0.00102909	3							3
TKEQVTNVGGAVVTGVTAVAQK		P37377	Alpha-synuclein OS=Rattus norvegicus GN=Snca PE=1 SV=1 - [SYUA_RAT]	2157.2	0	0	0	0	0	0	0	21448305	0	0	0	2.24316e+07								47.02			49.28	48.8								7.34855e-05			4.54423e-05	5.20711e-05								2
FVGGSGQVSEQIMGLLGDKVK		P21396	Amine oxidase [flavin-containing] A OS=Rattus norvegicus GN=Maoa PE=1 SV=1 - [AOFA_RAT]	2149.13	0	0	0	0	0	19349716	33286353	0	3.12964e+07	0	22453726	0						65.3	72.17		67.54		74.83							1.99207e-06	3.97412e-07		1.14528e-06		2.21975e-07							3	3		3
KFVGGSGQVSEQIMGLLGDKVK		P21396	Amine oxidase [flavin-containing] A OS=Rattus norvegicus GN=Maoa PE=1 SV=1 - [AOFA_RAT]	2277.22	0	0	1.79539e+08	0	1.17889e+08	80166546	9.41845e+07	4.64178e+07	1.06925e+08	0	1.24034e+08	0			54.45		73.03	38.55	50.51	68.41	59.17		62.58				1.95612e-05		2.71267e-07	0.000761021	4.62385e-05	7.85953e-07	6.59776e-06		2.95361e-06				3		3	3	3	3	3
TMDEMGKEIPVDAPWQAR		P21396	Amine oxidase [flavin-containing] A OS=Rattus norvegicus GN=Maoa PE=1 SV=1 - [AOFA_RAT]	2073.97	2.81925e+06	0	0	49854219	0	47591353	5.35438e+07	0	67697544	2.9718e+07	0	0	45.84			52.66		42.72	48.77		52.35	37.83			0.000123792			2.5203e-05		0.0002459	5.84054e-05		2.56125e-05	0.000766396			3			3		3	3		3
HHLEALQSSK		O08838	Amphiphysin OS=Rattus norvegicus GN=Amph PE=1 SV=1 - [AMPH_RAT]	1149.6	8.95719e+06	0	0	0	0	0	0	0	0	1.77868e+07	0	2.41363e+07	41.25									45.98		39.76	0.000386196									0.000121127		0.000507272	2
KGPPVPPLPK		O08838	Amphiphysin OS=Rattus norvegicus GN=Amph PE=1 SV=1 - [AMPH_RAT]	1029.64	0	0	0	95884677	8.31852e+07	1.32686e+08	1.36675e+08	0	1.23644e+08	73057729	0	0				43.16	43.7	58.8	39.31		44.47	47.65						8.69506e-05	7.67843e-05	2.37286e-06	0.000210995		6.43091e-05	3.09224e-05						2	2	2	2		2
LGKADETKDEQFEEYVQNFKR		O08838	Amphiphysin OS=Rattus norvegicus GN=Amph PE=1 SV=1 - [AMPH_RAT]	2574.25	0	0	5.07938e+07	0	0	3.1105e+07	0	0	4.00001e+07	2.79145e+07	0	0			47.12			56.71			52.05	56.93					0.000169828			1.86641e-05			5.20819e-05	1.71339e-05					3			3			3
LVDGSLLTLDTYLGQFPDIKNR		O08838	Amphiphysin OS=Rattus norvegicus GN=Amph PE=1 SV=1 - [AMPH_RAT]	2478.32	0	0	2.71866e+07	2.07891e+07	23102551	1.62861e+07	0	0	0	2.4567e+07	2.04541e+07	0			42.03	45.76	57.4	63.21				67.21	70.42				0.000344638	0.000160604	1.06453e-05	2.8413e-06				1.08361e-06	5.26536e-07				3	3	3	3
AKHPMDTEITK		P18484	AP-2 complex subunit alpha-2 OS=Rattus norvegicus GN=Ap2a2 PE=1 SV=3 - [AP2A2_RAT]	1270.65	0	0	0	3.65811e+07	0	0	53188313	0	0	0	3.55602e+07	0				34.66			42.98			45.3	37.18					0.00112853			0.000166155			9.88655e-05	0.000631704					2			2
GLAVFISDIR		P18484	AP-2 complex subunit alpha-2 OS=Rattus norvegicus GN=Ap2a2 PE=1 SV=3 - [AP2A2_RAT]	1090.62	0	0	80521390	50528284	3.35228e+07	3.70886e+07	8.02638e+07	4.30388e+07	59200649	0	5.54467e+07	84674691			51.54	79.64	61.83	73.16	62.96	76.8	73.06		65.02	76.48			2.24466e-05	2.98767e-08	1.93563e-06	1.30426e-07	1.36573e-06	5.6411e-08	1.35935e-07		8.65631e-07	6.07245e-08			2	2	2	2	2	2	2
INKELANIR		P18484	AP-2 complex subunit alpha-2 OS=Rattus norvegicus GN=Ap2a2 PE=1 SV=3 - [AP2A2_RAT]	1070.63	0	1.26133e+07	3.33471e+08	1.63131e+08	1.30884e+08	1.43712e+08	0	0	2.60768e+08	0	1.41558e+08	0	42.9	42.83	56.87	52.57	66.29	50.07			54.32	36.75	52.63		0.000100008	0.000101633	4.00899e-06	1.07903e-05	4.58178e-07	1.91882e-05			7.21165e-06	0.00041213	1.06423e-05		3	2	2	2	2	2			2
KGPSTVTDLEETKR		P18484	AP-2 complex subunit alpha-2 OS=Rattus norvegicus GN=Ap2a2 PE=1 SV=3 - [AP2A2_RAT]	1560.82	0	0	4.66937e+07	3.05615e+07	0	3.44935e+07	4.73976e+07	0	6.07681e+07	2.71716e+07	0	0			71.36	51.49		81.73	82.25		93.06	49.16					4.45995e-07	4.43486e-05		4.23e-08	3.75267e-08		3.11416e-09	7.58368e-05					3	3		3	3		3
KGPSTVTDLEETKRER		P18484	AP-2 complex subunit alpha-2 OS=Rattus norvegicus GN=Ap2a2 PE=1 SV=3 - [AP2A2_RAT]	1845.97	0	0	60543447	2.38982e+07	0	3.36195e+07	0	2.40586e+06	0	2.46688e+07	1.58435e+07	2.49551e+07			64.85	57.2	33.96	47.67		52.88		59.73	64.12	40.86			1.93131e-06	1.20044e-05	0.00237057	0.000100036		3.01409e-05		6.38486e-06	2.24609e-06	0.000488109			3	3	4	3		3
KKGPSTVTDLEETKR		P18484	AP-2 complex subunit alpha-2 OS=Rattus norvegicus GN=Ap2a2 PE=1 SV=3 - [AP2A2_RAT]	1688.92	0	0	40169219	0	0	0	0	0	0	0	1.35179e+07	2.23719e+07			44.13								67.83	45.43			0.00025307								1.06306e-06	0.000181875			3
LSTVASTDILATVLEEMPPFPERESSILAK		P18484	AP-2 complex subunit alpha-2 OS=Rattus norvegicus GN=Ap2a2 PE=1 SV=3 - [AP2A2_RAT]	3244.7	0	0	0	60906393	56162886	5.41432e+07	0	6.57856e+07	0	0	0	0				36.48	36.32	31.65		35.5								0.00136068	0.00142341	0.00410347		0.00152193								3	3	3		3
CLKDEDPYVR	C1(Methylthio)	P62944	AP-2 complex subunit beta OS=Rattus norvegicus GN=Ap2b1 PE=1 SV=1 - [AP2B1_RAT]	1283.58	0	0	0	32874252	1.8878e+07	3.51944e+07	0	0	4.21875e+07	0	0	0				37.65	37.46	47.58			49.56							0.000309224	0.00036792	3.14248e-05			1.99192e-05							2	2	2			2
ECHLNADTVSSK	C2(Methylthio)	P62944	AP-2 complex subunit beta OS=Rattus norvegicus GN=Ap2b1 PE=1 SV=1 - [AP2B1_RAT]	1349.58	0	4.18328e+06	0	2.45625e+07	0	1.73368e+07	59302878	1.33958e+07	5.33543e+07	0	2.18664e+07	26083812		45.74		53.01		32.68	53.66	64.07	55.99		50.89	61.13		4.40032e-05		8.25057e-06		0.000890193	6.67316e-06	6.46374e-07	4.15417e-06		1.34426e-05	1.27199e-06		2		2		2	2	2	2
KGEIFELK		P62944	AP-2 complex subunit beta OS=Rattus norvegicus GN=Ap2b1 PE=1 SV=1 - [AP2B1_RAT]	963.551	0	0	0	2.67538e+07	0	0	6.68839e+07	0	5.26576e+07	0	2.09224e+07	0				47.29			34.18		33.07		37.26					6.25237e-05			0.00127951		0.00157816		0.000629571					2			2		2
KTAAVCVAK	C6(Methylthio)	P62944	AP-2 complex subunit beta OS=Rattus norvegicus GN=Ap2b1 PE=1 SV=1 - [AP2B1_RAT]	936.5	6.23966e+06	5.65174e+06	0	2.09249e+07	1.92333e+07	1.45739e+07	21807826	5.15459e+06	0	0	0	2.62788e+07	59.75	53.01		71.34	31.59	51.45	40.08	53.93				69.79	2.59517e-06	1.22508e-05		1.72611e-07	0.00166422	1.75455e-05	0.000240528	9.91211e-06				2.5189e-07	2	2		2	2	2	2	2
LLSTDPVTAK		P62944	AP-2 complex subunit beta OS=Rattus norvegicus GN=Ap2b1 PE=1 SV=1 - [AP2B1_RAT]	1044.59	0	0	0	9.66746e+07	0	1.50414e+08	2.36633e+08	0	210938476	0	1.18066e+08	6.92731e+07				30.03		54.84	60.89		31.94		59.45	57.37				0.0047173		1.55845e-05	3.86985e-06		0.00303874		5.3913e-06	8.70349e-06				2		2	2		2
LQNNNVYTIAKR		P62944	AP-2 complex subunit beta OS=Rattus norvegicus GN=Ap2b1 PE=1 SV=1 - [AP2B1_RAT]	1433.78	0	4.94717e+06	0	0	0	3.28415e+07	0	0	4.97492e+07	2.25395e+07	0	0		58.87				45.49			53.04	36.15				7.06963e-06				0.000112995			2.0112e-05	0.0013225				3				3			3
FGMNDKIVIEK		P84092	AP-2 complex subunit mu OS=Rattus norvegicus GN=Ap2m1 PE=1 SV=1 - [AP2M1_RAT]	1293.68	0	0	124873657	0	0	14292292	0	5.55074e+06	0	2.16203e+07	0	1.59259e+07			39.28			46.7		42.37	40.36	49.45	30.27	43.66			0.000537046			9.40703e-05		0.000286817	0.000437214	5.44805e-05	0.00357095	0.000208805			3			3		3	2
LSKFDSER		P84092	AP-2 complex subunit mu OS=Rattus norvegicus GN=Ap2m1 PE=1 SV=1 - [AP2M1_RAT]	981.5	0	1.8727e+07	0	4.94174e+07	67705691	8.17861e+07	40560761	0	0	7.26574e+07	0	0		53.06		48.47	53.16	40.75	53.7			56.81				1.55708e-05		4.3381e-05	1.52164e-05	0.000265039	1.34373e-05			6.3577e-06				2		2	2	2	2
QSIAIDDCTFHQCVR	C8(Methylthio); C13(Methylthio)	P84092	AP-2 complex subunit mu OS=Rattus norvegicus GN=Ap2m1 PE=1 SV=1 - [AP2M1_RAT]	1827.76	0	0	1.86034e+07	0	1.74093e+07	0	3.30787e+07	104939354	17154652	1.86284e+07	2.90731e+07	3.34414e+07			62.21		70.58		78.03	92.39	78.39	57.04	85.2	91.37			5.9975e-07		9.18733e-08		1.81008e-08	6.63281e-10	1.59365e-08	2.17467e-06	3.32195e-09	8.02403e-10			2		2		2	2	2
SGKQSIAIDDCTFHQCVR	C11(Methylthio); C16(Methylthio)	P84092	AP-2 complex subunit mu OS=Rattus norvegicus GN=Ap2m1 PE=1 SV=1 - [AP2M1_RAT]	2099.91	0	0	5.65573e+07	4.94284e+07	0	35770853	69424358	0	44633383	0	0	0			91.12	73.47		83.03	84.58		84.08						1.66126e-09	1.30436e-07		1.5181e-08	7.66342e-09		1.13344e-08						3	3		3	3		3
SISFIPPDGEFELMR		P84092	AP-2 complex subunit mu OS=Rattus norvegicus GN=Ap2m1 PE=1 SV=1 - [AP2M1_RAT]	1737.84	7.57246e+07	0	3.75088e+08	1.58625e+08	1.98126e+08	1.73454e+08	7.36872e+07	0	1.92973e+08	83188611	1.92793e+08	139338003	37.78		48.07	33	47.55	50.91	40.54		46.79	47.64	43.05	48.34	0.00118375		0.00010527	0.00368373	0.000129207	5.31179e-05	0.000644648		0.000147635	0.000126557	0.000317088	0.000104787	2		2	2	2	2	2		2
VNVIHAR		P84092	AP-2 complex subunit mu OS=Rattus norvegicus GN=Ap2m1 PE=1 SV=1 - [AP2M1_RAT]	808.478	0	2.16458e+06	0	0	0	1.35097e+07	0	0	1.66492e+07	0	0	8.80223e+06		51.19				49.23			50.94			40.09		7.58525e-06				1.19116e-05			8.03471e-06			9.7717e-05		2				2			2
WARPPISMNFEVPFAPSGLK		P84092	AP-2 complex subunit mu OS=Rattus norvegicus GN=Ap2m1 PE=1 SV=1 - [AP2M1_RAT]	2244.16	0	0	0	1.98196e+08	0	4.96397e+07	0	0	2.24199e+08	0	1.19665e+08	1.415e+08			42.85	44.65	47.16	39.83	39.39		44.24	43.92	40.21	45.15			0.000459138	0.0002725	0.000171155	0.000889132	0.00097818		0.000297596	0.000332517	0.000767001	0.000267306			2	3	2	3	2		3
AGQTQPNPGILPIQPALTPR		P0C1X8	AP2-associated protein kinase 1 OS=Rattus norvegicus GN=Aak1 PE=1 SV=1 - [AAK1_RAT]	2069.15	0	0	6.83017e+07	5.35424e+07	72805534	55687395	67665267	0	7.12178e+07	34970823	45434385	37337588			62.78	77	56.5	45.27	34.27		53.51	41.51	56.75	53.26			1.66077e-06	7.88129e-08	7.72359e-06	9.8065e-05	0.00127198		1.76034e-05	0.000278995	8.34828e-06	1.86465e-05			2	2	2	2	2		2
ILSDVTHSAVFGVPASK		P0C1X8	AP2-associated protein kinase 1 OS=Rattus norvegicus GN=Aak1 PE=1 SV=1 - [AAK1_RAT]	1727.94	0	0	4.28774e+07	0	22463552	0	0	0	0	0	0	2.37655e+07			50.02		50.14							36.59			4.77795e-05		4.45408e-05							0.00110737			3		3
LTDPIPTTETSIAPR		P0C1X8	AP2-associated protein kinase 1 OS=Rattus norvegicus GN=Aak1 PE=1 SV=1 - [AAK1_RAT]	1611.85	0	0	45942658	3.32837e+07	5.45617e+07	5.06275e+07	0	0	4.45403e+07	2.9842e+07	3.0536e+07	25577041			69.48	74.58	51.55	79.08			58.04	80.49	69.78	67.45			5.41055e-07	1.67202e-07	3.18428e-05	5.93255e-08			7.30219e-06	5.18117e-08	5.04942e-07	9.89379e-07			2	2	2	2			2
STQLLHAAAAEASLSK		P0C1X8	AP2-associated protein kinase 1 OS=Rattus norvegicus GN=Aak1 PE=1 SV=1 - [AAK1_RAT]	1597.85	0	0	1.3618e+08	0	1.09274e+08	4.04181e+07	3.7512e+07	3.67982e+07	0	0	0	0			48.2		78.55	35.27	54.29	69.28							6.73535e-05		6.14402e-08	0.00126296	1.58266e-05	5.25243e-07							2		2	2	2	2
VQTTPPPTIQGQK		P0C1X8	AP2-associated protein kinase 1 OS=Rattus norvegicus GN=Aak1 PE=1 SV=1 - [AAK1_RAT]	1394.76	0	0	0	2.12723e+07	0	2.70141e+07	3.42996e+07	0	4.25487e+07	1.92613e+07	0	1.3944e+07				41.09		48.75	62.8		50.57	45.21		33.18				0.000276203		4.20059e-05	1.65314e-06		3.1572e-05	0.000119014		0.00151464				2		2	2		2
DVFLPKPSWGNHTPIFR		P00507	Aspartate aminotransferase, mitochondrial OS=Rattus norvegicus GN=Got2 PE=1 SV=2 - [AATM_RAT]	2011.05	0	0	32983285	0	0	0	4.27907e+07	0	0	0	3.63916e+07	0			35.86				39.64				31.17				0.00141383				0.000559509				0.00397195				3				3
IAATILTSPDLR		P00507	Aspartate aminotransferase, mitochondrial OS=Rattus norvegicus GN=Got2 PE=1 SV=2 - [AATM_RAT]	1270.73	0	0	68802143	51555083	0	2.61669e+07	55168068	0	0	0	41660530	0			89.47	69.96		72.83	73.53				76.44				3.72833e-09	2.62406e-07		1.38117e-07	1.50827e-07				9.41994e-08				2	2		2	2
ISVAGVTSGNVGYLAHAIHQVTK		P00507	Aspartate aminotransferase, mitochondrial OS=Rattus norvegicus GN=Got2 PE=1 SV=2 - [AATM_RAT]	2322.26	0	0	2.15095e+08	1.27678e+08	0	0	0	0	151297639	1.30162e+08	0	0			63.49	39.35	30.45				44.66	81.97		39.93			2.26095e-06	0.000586532	0.00468817				0.00016244	3.17665e-08		0.000487799			3	3	4				3
KMNLGVGAYRDDNGKPYVLPSVR	N13(Deamidated)	P00507	Aspartate aminotransferase, mitochondrial OS=Rattus norvegicus GN=Got2 PE=1 SV=2 - [AATM_RAT]	2550.31	0	0	8.95084e+07	1.34125e+08	1.38716e+08	0	0	4.47982e+07	1.08332e+08	0	0	1.67175e+08			53.33	40.21	37.51			50.75	39.33			46.13			3.57677e-05	0.000747945	0.00135725			6.47874e-05	0.000904277			0.000187711			3	3	3			3	3
MNLGVGAYRDDNGKPYVLPSVR	N12(Deamidated)	P00507	Aspartate aminotransferase, mitochondrial OS=Rattus norvegicus GN=Got2 PE=1 SV=2 - [AATM_RAT]	2422.22	0	0	1.1796e+08	0	89615392	0	0	0	6.07786e+07	0	0	8.9614e+07			34.73		34.1				37.67			37.99			0.00291083		0.00330688				0.00136801			0.00116758			3		3				3
NLDKEYLPIGGLADFCK	C16(Methylthio)	P00507	Aspartate aminotransferase, mitochondrial OS=Rattus norvegicus GN=Got2 PE=1 SV=2 - [AATM_RAT]	1941.94	0	0	1.89585e+08	0	0	8.62036e+07	113019366	0	1.35593e+08	6.63569e+07	149907870	0			65.66	60.96	46.62	73.69	57.13		55.32	62.23	67.29	55.17			1.33106e-06	3.96831e-06	0.00010453	2.0523e-07	9.29483e-06		1.46882e-05	2.87238e-06	9.42522e-07	1.47483e-05			2	3	3	2	2		2
APGIIPR		P15999	ATP synthase subunit alpha, mitochondrial OS=Rattus norvegicus GN=Atp5a1 PE=1 SV=2 - [ATPA_RAT]	723.45	3.51554e+07	1.82275e+08	922156608	6.5476e+08	6.95374e+08	5.60888e+08	1415334139	0	1.49125e+09	3.88208e+08	4.14411e+08	367605134	54.87	51.87	43.13	42.79	54.24	54.15	54.08	47.65	54.21	54.23	54.11	51.82	3.25065e-06	6.4859e-06	4.85255e-05	5.24771e-05	3.75811e-06	3.83681e-06	3.89915e-06	1.71384e-05	3.78416e-06	3.76678e-06	3.87231e-06	6.561e-06	2	2	2	2	2	2	2	2	2
AVDSLVPIGR		P15999	ATP synthase subunit alpha, mitochondrial OS=Rattus norvegicus GN=Atp5a1 PE=1 SV=2 - [ATPA_RAT]	1026.59	5.27024e+08	4.20949e+08	4.57545e+09	0	0	1.7401e+09	0	1.8128e+08	5287195661	0	0	0	47.08	52.77	51.22			50.27		39.91	52.46	36.72			3.52592e-05	1.08331e-05	1.35917e-05			2.25534e-05		0.000209293	1.16347e-05	0.000585238			2	2	2			2		2	2
AVDSLVPIGRGQR		P15999	ATP synthase subunit alpha, mitochondrial OS=Rattus norvegicus GN=Atp5a1 PE=1 SV=2 - [ATPA_RAT]	1367.78	0	0	1.02567e+08	5.14191e+07	8.93081e+07	0	0	0	2.85057e+07	0	4.21532e+07	6.23812e+07			40.35	35.54	40.18				36.06		33.32	40.53			0.000152224	0.000530583	0.000158301				0.00047071		0.000768217	0.000146044			3	3	3				3
EAYPGDVFYLHSR		P15999	ATP synthase subunit alpha, mitochondrial OS=Rattus norvegicus GN=Atp5a1 PE=1 SV=2 - [ATPA_RAT]	1553.74	0	0	0	2.27497e+08	8.71877e+07	1.55285e+08	0	0	313893292	1.05412e+08	0	1.28423e+08			56.91	51.59	51.97	53.59	59.09		48.45	44.81	51.45	47.68			8.65743e-06	2.91239e-05	2.44602e-05	1.81572e-05	5.73394e-06		6.00135e-05	0.000138755	3.04361e-05	8.3598e-05			3	2	2	2	3		2
ELIIGDR		P15999	ATP synthase subunit alpha, mitochondrial OS=Rattus norvegicus GN=Atp5a1 PE=1 SV=2 - [ATPA_RAT]	815.463	0	99489884	0	184150260	0	4.59802e+08	0	1.22669e+07	5.15905e+08	294759557	1.44468e+08	78740310		48.89		48.01		47.94		47.81	48.02	35.1	47.91	48.02		6.32697e-05		6.64124e-05		7.87401e-05		8.11327e-05	7.7303e-05	0.00151424	7.92859e-05	7.7303e-05		2		2		2		2	2
ELIIGDRQTGK		P15999	ATP synthase subunit alpha, mitochondrial OS=Rattus norvegicus GN=Atp5a1 PE=1 SV=2 - [ATPA_RAT]	1229.69	0	6.23711e+07	8.62114e+08	576998048	786087062	8.65932e+08	4.05454e+08	7.12418e+07	6.40501e+08	5.91432e+08	387762996	5.20694e+08		39.02	43.61	42.27	44.28	56.97	37	54.39	44.23	56.26	47.52	53.88		0.000482459	0.000167672	0.000246064	0.000141835	7.73501e-06	0.0007582	1.38288e-05	0.000156692	9.10879e-06	6.81492e-05	1.57565e-05		2	2	2	2	2	2	2	2
GIRPAINVGLSVSR		P15999	ATP synthase subunit alpha, mitochondrial OS=Rattus norvegicus GN=Atp5a1 PE=1 SV=2 - [ATPA_RAT]	1438.85	7.17441e+07	0	333131440	2.12606e+08	1.17222e+08	57860800	0	0	0	0	0	0	32.69		53.23	61.87	49.45	54.86	67.57		56.34	60.03	58.77	63.84	0.000645924		4.75335e-06	7.80156e-07	1.36201e-05	4.57223e-06	3.14972e-07		3.94865e-06	1.19174e-06	1.32739e-06	5.16309e-07	2		2	2	2	2	3		3
GMSLNLEPDNVGVVVFGNDK		P15999	ATP synthase subunit alpha, mitochondrial OS=Rattus norvegicus GN=Atp5a1 PE=1 SV=2 - [ATPA_RAT]	2104.04	0	0	2.68229e+08	0	7.98089e+07	1.15674e+08	3.90833e+08	4.07266e+07	2.51795e+08	1.44698e+08	1.58549e+08	1.24466e+08			38.27		36.26	39.16	37.35	36.94	40.93	33.11	37.16	36.64			0.00109468		0.00175078	0.000916109	0.00136217	0.0014768	0.000597354	0.00368933	0.00145193	0.00163662			2		2	2	2	2	2
GMSLNLEPDNVGVVVFGNDKLIK	N18(Deamidated)	P15999	ATP synthase subunit alpha, mitochondrial OS=Rattus norvegicus GN=Atp5a1 PE=1 SV=2 - [ATPA_RAT]	2459.28	0	0	6.23528e+08	0	0	0	3.62147e+08	28051441	3.60136e+08	0	1.94655e+08	3.61377e+08			40.06		42.82		56.16	30.86	49.51		49.08	56.59			0.000695327		0.000352617		1.63419e-05	0.0058245	8.39578e-05		9.14601e-05	1.6446e-05			3		2		3	3	3
GMSLNLEPDNVGVVVFGNDKLIK	M2(Oxidation)	P15999	ATP synthase subunit alpha, mitochondrial OS=Rattus norvegicus GN=Atp5a1 PE=1 SV=2 - [ATPA_RAT]	2474.29	0	0	0	0	6.77965e+07	72046543	1.18961e+08	0	7.77115e+07	7.51194e+07	9.95073e+07	87621729					31.06	37.53	35.28		35.77	39.06	43.93	48.65					0.00544484	0.00124506	0.00211985		0.00193341	0.000869157	0.00029534	0.000100297					3	3	3		3
GMSLNLEPDNVGVVVFGNDKLIKEGDIVK		P15999	ATP synthase subunit alpha, mitochondrial OS=Rattus norvegicus GN=Atp5a1 PE=1 SV=2 - [ATPA_RAT]	3099.63	0	0	0	8.05654e+07	1.28906e+08	0	5.71661e+07	0	0	0	7.82286e+07	7.45084e+07				39.9	32.61	37.3	37.1				41.4	37.14				0.000660024	0.00350897	0.00115449	0.00134539				0.000510727	0.00141034				4	4	3	4
GMSLNLEPDNVGVVVFGNDKLIKEGDIVKR		P15999	ATP synthase subunit alpha, mitochondrial OS=Rattus norvegicus GN=Atp5a1 PE=1 SV=2 - [ATPA_RAT]	3255.74	0	0	1.46994e+08	0	0	4.47842e+08	0	9.40811e+07	0	0	0	103320758			30.53			40.05		41.61				34.38			0.00429281			0.000439906		0.000303706				0.00162316			3			3		3
ILGADTSVDLEETGR		P15999	ATP synthase subunit alpha, mitochondrial OS=Rattus norvegicus GN=Atp5a1 PE=1 SV=2 - [ATPA_RAT]	1575.79	5.51909e+08	2.08531e+08	7.79852e+08	9.08361e+08	749498588	1.3398e+09	1.05366e+09	4.8631e+08	1192853078	1.02478e+09	810460674	959600554	88.61	133	117.82	99.98	124.01	117.77	89.81	114.26	109.63	117.89	103.48	118	8.67642e-09	3.05724e-13	1.01596e-11	6.37931e-10	2.95908e-12	1.03608e-11	5.7982e-09	2.36233e-11	6.75137e-11	9.0218e-12	2.78222e-10	9.66785e-12	2	2	2	2	2	2	2	2	2
ILGADTSVDLEETGRVLSIGDGIAR		P15999	ATP synthase subunit alpha, mitochondrial OS=Rattus norvegicus GN=Atp5a1 PE=1 SV=2 - [ATPA_RAT]	2557.35	1.63075e+08	0	0	7.37161e+08	684289069	1.37343e+09	162844741	1.60973e+09	0	281023644	0	0	66.68		42.23	68.37	53.01	56.85	59.99	48.42	45.03	53.15	40.37	54.08	1.18131e-06		0.00039196	8.22334e-07	2.70019e-05	1.25988e-05	5.51268e-06	7.84145e-05	0.000175868	2.66295e-05	0.000505083	2.13008e-05	3		2	3	3	3	3	3	2
ISVREPMQTGIK		P15999	ATP synthase subunit alpha, mitochondrial OS=Rattus norvegicus GN=Atp5a1 PE=1 SV=2 - [ATPA_RAT]	1358.75	0	2.54161e+08	0	4185701526	3961735891	2.62426e+09	4.22447e+09	1.62953e+08	0	2414345224	0	2.91168e+09		49.31	41.32	44.25	49.52	40.42	57.36	57.31	38.3	49.52	37.46	44.93		6.68151e-05	0.000405847	0.000216107	6.0869e-05	0.000517458	1.0101e-05	1.05895e-05	0.00081351	5.02588e-05	0.000987103	0.000184785		2	3	2	2	2	2	2	3
ISVREPMQTGIK	M7(Oxidation)	P15999	ATP synthase subunit alpha, mitochondrial OS=Rattus norvegicus GN=Atp5a1 PE=1 SV=2 - [ATPA_RAT]	1374.74	7.61946e+07	0	8.77495e+08	592983882	1.01011e+09	811229212	7.50302e+08	0	9.17208e+08	4.22686e+08	5.9018e+08	4.05594e+08	30.38		41.08	35.82	42.73	40.43	46.78		40.58	48.55	49.28	46.01	0.005818		0.000495192	0.00167564	0.000341334	0.000579669	0.000133283		0.000555615	8.93676e-05	7.55405e-05	0.000159138	2		2	2	2	2	2		2
ISVREPMQTGIKAVDSLVPIGR		P15999	ATP synthase subunit alpha, mitochondrial OS=Rattus norvegicus GN=Atp5a1 PE=1 SV=2 - [ATPA_RAT]	2366.32	4.78901e+07	0	0	1.83727e+08	5.61115e+08	3.0467e+08	0	3.06751e+07	0	2.78139e+08	0	0	64.94			62.39	60.48	77.19		67.3		69.23	32.78		7.37442e-07			1.38424e-06	2.14888e-06	4.77463e-08		4.46901e-07		2.92527e-07	0.00126535		3			3	3	3		3
LIKEGDIVK		P15999	ATP synthase subunit alpha, mitochondrial OS=Rattus norvegicus GN=Atp5a1 PE=1 SV=2 - [ATPA_RAT]	1014.62	0	4.71895e+06	0	0	0	0	37103561	0	0	0	37914314	0		32.54					35.57				41.61			0.00181085					0.000901329				0.000224328			2					2
LIKEGDIVKR		P15999	ATP synthase subunit alpha, mitochondrial OS=Rattus norvegicus GN=Atp5a1 PE=1 SV=2 - [ATPA_RAT]	1170.72	0	0	0	2.49762e+08	0	2.8606e+08	208713542	0	3.48335e+08	0	2.8957e+08	2.6783e+08			63.44	69.19	61.51	61.42	55.76	39.12	70.89	61.44	66.82	62.38			8.8315e-07	2.34982e-07	1.37732e-06	1.40616e-06	5.17648e-06	0.0002388	1.58867e-07	1.3997e-06	4.05541e-07	1.12729e-06			3	2	3	2	2	3	2
LKEIVTNFLAGFEP	N7(Deamidated)	P15999	ATP synthase subunit alpha, mitochondrial OS=Rattus norvegicus GN=Atp5a1 PE=1 SV=2 - [ATPA_RAT]	1578.84	0	0	69333869	0	0	0	2.39555e+07	0	3.44447e+07	0	2.96331e+07	0			31.55				34.55		32.99		31.17				0.00381414				0.00196421		0.00273777		0.00427748				2				2		2
LKEIVTNFLAGFEP		P15999	ATP synthase subunit alpha, mitochondrial OS=Rattus norvegicus GN=Atp5a1 PE=1 SV=2 - [ATPA_RAT]	1577.86	0	0	703245281	6.87849e+08	6.12521e+08	414530091	7.64922e+08	272457530	7.92334e+08	4.77224e+08	872346394	0			31.86	39.89	40.11	39.69	33.4	36.34	44.85	41.3	30.26				0.00306265	0.000476928	0.000448495	0.000483295	0.00214831	0.00109169	0.000162034	0.000348416	0.00461526				2	2	2	2	2	2	2
LTELLK		P15999	ATP synthase subunit alpha, mitochondrial OS=Rattus norvegicus GN=Atp5a1 PE=1 SV=2 - [ATPA_RAT]	716.456	0	3.52256e+07	138962022	9.85223e+07	0	4.55481e+07	2.41174e+08	0	186250002	4.9173e+07	108449286	0		47.29	47.35	42.19		42.16	47.14		42.32	45.72	45.6			9.89181e-05	9.75609e-05	0.000320093		0.000322312	0.000102394		0.000310653	0.000141996	0.000145974			2	2	2		2	2		2
NVQAEEMVEFSSGLK		P15999	ATP synthase subunit alpha, mitochondrial OS=Rattus norvegicus GN=Atp5a1 PE=1 SV=2 - [ATPA_RAT]	1667.79	324972652	0	2.00163e+08	6.57227e+08	3.71075e+08	7.2246e+08	7.27148e+08	8.42845e+08	6.50611e+08	7.08948e+08	318266172	325623340	42.28	80.54	75.25	87.98	75.51	75.58	82.77	80.14	80.1	80.17	79.94	90.87	0.000278034	4.76863e-08	1.61211e-07	8.75715e-09	1.54655e-07	1.3143e-07	2.8536e-08	5.2287e-08	5.32594e-08	5.19271e-08	5.22164e-08	3.88771e-09	2	2	2	2	2	2	2	2	2
QMSLLLR		P15999	ATP synthase subunit alpha, mitochondrial OS=Rattus norvegicus GN=Atp5a1 PE=1 SV=2 - [ATPA_RAT]	860.506	1.02099e+07	0	109957651	7.18209e+07	36557925	0	142493127	0	1.32422e+08	5.93881e+07	9.25931e+07	0	41.54		58.5	50.36	50.31		50.98		58.51	54.97	51.01		0.000227973		5.5089e-06	4.32611e-05	3.35199e-05		2.59348e-05		5.07344e-06	1.03486e-05	3.09076e-05		2		2	2	2		2		2
QTGKTSIAIDTIINQKR		P15999	ATP synthase subunit alpha, mitochondrial OS=Rattus norvegicus GN=Atp5a1 PE=1 SV=2 - [ATPA_RAT]	1887.06	0	0	0	0	0	128540805	0	1.47801e+08	0	148718427	1.51812e+08	208120261						68.51		61.94		54.64	51.92	57.54						5.07344e-07		1.9192e-06		1.23681e-05	1.73526e-05	5.37403e-06						3		3
RTGAIVDVPVGDELLGR		P15999	ATP synthase subunit alpha, mitochondrial OS=Rattus norvegicus GN=Atp5a1 PE=1 SV=2 - [ATPA_RAT]	1766.97	0	0	2.98993e+08	1.74392e+08	1.86924e+08	218439676	160279411	0	0	1.31927e+08	183895258	174880066			86.29	70.67	74.36	81.58	37.04		66.78	77.06	69.94	79.94			1.05733e-08	3.59956e-07	1.37414e-07	2.74535e-08	0.000790788		7.87102e-07	7.87155e-08	4.25843e-07	3.65008e-08			2	2	2	2	2		3
RTGAIVDVPVGDELLGRVVDALGNAIDGKGPVGSK		P15999	ATP synthase subunit alpha, mitochondrial OS=Rattus norvegicus GN=Atp5a1 PE=1 SV=2 - [ATPA_RAT]	3444.88	0	0	2.91974e+08	1.48316e+08	3.04499e+08	0	0	0	0	0	0	0			33.98	43.7	35.59										0.00103986	0.000100246	0.000690144										4	4	4
RTGAIVDVPVGDELLGRVVDALGNAIDGKGPVGSK	N24(Deamidated)	P15999	ATP synthase subunit alpha, mitochondrial OS=Rattus norvegicus GN=Atp5a1 PE=1 SV=2 - [ATPA_RAT]	3445.86	0	0	5.6129e+07	0	5.54642e+07	2.97785e+07	0	0	0	0	1.2191e+07	2.80438e+07			53.61		35.86	39.05					47.63	38.49			1.26298e-05		0.00072637	0.000373354					4.91864e-05	0.00041058			4		4	4
RVGLKAPGIIPR		P15999	ATP synthase subunit alpha, mitochondrial OS=Rattus norvegicus GN=Atp5a1 PE=1 SV=2 - [ATPA_RAT]	1276.82	1.47749e+08	0	0	1.19234e+09	2132805968	796534025	8.40268e+08	5.34395e+07	1.28384e+09	0	1.61168e+09	1.00456e+09	39.1		40.94	37.36	42.3	40.21	40.26	42.3	40.23	43.11	43.91	40.31	0.000122735		8.03471e-05	0.000183219	5.87449e-05	9.50539e-05	9.39658e-05	5.87449e-05	9.46172e-05	4.87495e-05	4.05481e-05	9.28902e-05	3		2	3	3	3	3	3	3
TGAIVDVPVGDELLGR		P15999	ATP synthase subunit alpha, mitochondrial OS=Rattus norvegicus GN=Atp5a1 PE=1 SV=2 - [ATPA_RAT]	1610.88	7.01392e+08	6.16621e+06	2.92371e+09	2829654711	2625288763	3241884685	3.82974e+09	107960546	3775735283	2.04508e+09	2744272383	2.23029e+09	69.78	81.42	70.35	88.02	81.01	70.85	73.72	81.23	79.26	82.74	89.52	77.82	4.78643e-07	2.92049e-08	4.24383e-07	6.38933e-09	3.28888e-08	3.7412e-07	1.71971e-07	3.05109e-08	5.39525e-08	2.20825e-08	5.08173e-09	6.85564e-08	2	2	2	2	2	2	2	2	2
TGAIVDVPVGDELLGRVVDALGNAIDGK		P15999	ATP synthase subunit alpha, mitochondrial OS=Rattus norvegicus GN=Atp5a1 PE=1 SV=2 - [ATPA_RAT]	2763.5	0	0	1.01916e+08	0	9.46063e+07	0	4.35568e+07	0	0	0	1.71409e+07	1.67594e+07			40.66		48.89		46.42				57.82	48.1			0.00032213		4.71295e-05		7.9812e-05				5.86446e-06	5.26598e-05			3		3		3
TGAIVDVPVGDELLGRVVDALGNAIDGKGPVGSK		P15999	ATP synthase subunit alpha, mitochondrial OS=Rattus norvegicus GN=Atp5a1 PE=1 SV=2 - [ATPA_RAT]	3288.78	0	0	0	0	1.66884e+09	1.54634e+07	3.38951e+08	0	0	4.24379e+08	0	368794648	30.12				34.05	37.72	34.69			32.54		30.09	0.00359916				0.0015742	0.00065082	0.00130756			0.00178299		0.00391796	4				3	3	3
TGTAEMSSILEER	M6(Oxidation)	P15999	ATP synthase subunit alpha, mitochondrial OS=Rattus norvegicus GN=Atp5a1 PE=1 SV=2 - [ATPA_RAT]	1439.67	0	2.59876e+07	0	2.26801e+07	2.74466e+07	2.66301e+07	8.40818e+07	2.50765e+07	56584041	6.46562e+07	4.05198e+07	4.21695e+07		87.21		60.32	86.81	81.46	52.47	107.63	86.84	93.06	71.86	58.27		6.46367e-09		2.92624e-06	7.29572e-09	2.14349e-08	1.81197e-05	6.04043e-11	7.03848e-09	1.55708e-09	2.21554e-07	4.69149e-06		2		2	2	2	2	2	2
TGTAEMSSILEER		P15999	ATP synthase subunit alpha, mitochondrial OS=Rattus norvegicus GN=Atp5a1 PE=1 SV=2 - [ATPA_RAT]	1423.68	0	1.86191e+07	168790267	259286367	205242169	1.72746e+08	590174894	2.07721e+08	4.49276e+08	3.53555e+08	2.38508e+08	2.92596e+08		96.69	105.44	108.36	100.73	96.75	100.88	100.33	108.33	93.33	111.96	100.9		9.00014e-10	1.1859e-10	6.05408e-11	3.50791e-10	8.87665e-10	3.47048e-10	3.84634e-10	6.09604e-11	1.90451e-09	2.41982e-11	3.45453e-10		2	2	2	2	2	2	2	2
TSIAIDTIINQK		P15999	ATP synthase subunit alpha, mitochondrial OS=Rattus norvegicus GN=Atp5a1 PE=1 SV=2 - [ATPA_RAT]	1316.74	0	1.81642e+07	494955430	2.95137e+08	0	3.24272e+08	698694754	2.85456e+08	5.53804e+08	3.89001e+08	4.01542e+08	3.61895e+08		39.17	58.83	58.88		58.89	53.5	58.78	58.95	53.47	58.99	53.54		0.000417656	5.7604e-06	5.11207e-06		6.06873e-06	1.54106e-05	4.56898e-06	4.45726e-06	1.57423e-05	5.93059e-06	1.5048e-05		2	2	2		2	2	2	2
TSIAIDTIINQKR		P15999	ATP synthase subunit alpha, mitochondrial OS=Rattus norvegicus GN=Atp5a1 PE=1 SV=2 - [ATPA_RAT]	1472.84	8.23189e+07	0	7.09127e+08	524378807	4.46328e+08	4.45042e+08	6.24655e+08	0	0	509455167	0	0	97.38	91.25	98.17	71.37	98.17	98.14	98.2		41.83	112.45	59.69	55	4.38744e-10	1.61227e-09	3.65773e-10	1.7507e-07	5.33418e-10	3.68308e-10	3.63255e-10		0.000219809	1.90566e-11	3.65156e-06	1.05936e-05	2	2	2	2	2	2	2		3
VGLKAPGIIPR		P15999	ATP synthase subunit alpha, mitochondrial OS=Rattus norvegicus GN=Atp5a1 PE=1 SV=2 - [ATPA_RAT]	1120.72	1.35255e+09	0	4.30246e+09	0	8.12063e+09	2470493764	0	0	7.02228e+09	0	0	0	65.31	71.21	72.8	57.63	76.09	72.76		70.65	69.05				2.93745e-07	7.5504e-08	5.23564e-08	1.72175e-06	2.45454e-08	5.28409e-08		8.58954e-08	1.24157e-07				3	2	3	2	3	3		2	3
VLSIGDGIAR		P15999	ATP synthase subunit alpha, mitochondrial OS=Rattus norvegicus GN=Atp5a1 PE=1 SV=2 - [ATPA_RAT]	1000.58	8.42292e+08	6.30268e+08	3896842946	1748818517	4.47835e+09	4.85787e+07	5516063000	274356079	4.94512e+07	3.97014e+07	0	3889262411	47.43	59.35	67.46	55.06	52.44	61.85	49.63	56.04	57.72	48.64	61.39	69.72	8.85515e-05	5.74917e-06	1.26529e-06	1.57504e-05	2.7938e-05	3.233e-06	5.4991e-05	1.23198e-05	8.36768e-06	6.77026e-05	5.11905e-06	5.27965e-07	2	2	2	2	2	2	2	2	2
VVDALGNAIDGK		P15999	ATP synthase subunit alpha, mitochondrial OS=Rattus norvegicus GN=Atp5a1 PE=1 SV=2 - [ATPA_RAT]	1171.63	1.76807e+07	2.72943e+07	236937267	0	1.22258e+08	214901602	570916442	0	612234459	2.63708e+08	2.70575e+08	0	59.37	49.3	53.9		69.39	55.04	53.82		80.85	80.68	56.33		3.69956e-06	3.28971e-05	1.95543e-05		4.08534e-07	1.14365e-05	1.16187e-05		2.30228e-08	3.12099e-08	1.04764e-05		2	2	2		2	2	2		2
VVDALGNAIDGKGPVGSK	N7(Deamidated)	P15999	ATP synthase subunit alpha, mitochondrial OS=Rattus norvegicus GN=Atp5a1 PE=1 SV=2 - [ATPA_RAT]	1697.91	0	0	268829560	2.54201e+08	0	2.6342e+08	2.62309e+08	0	0	1.96686e+08	0	2.01631e+08		60.53	71.4	80.19	78.54	78.54	63.63		84.51	67.75	71.19	81.75		3.54046e-06	2.97019e-07	4.02022e-08	5.45839e-08	5.66833e-08	1.51729e-06		1.23899e-08	5.87581e-07	3.38345e-07	2.84046e-08		2	3	3	2	3	3		2
VVDALGNAIDGKGPVGSK		P15999	ATP synthase subunit alpha, mitochondrial OS=Rattus norvegicus GN=Atp5a1 PE=1 SV=2 - [ATPA_RAT]	1696.92	8.55623e+08	0	4.092e+09	3.71331e+09	3185505050	0	0	1.84347e+08	4.44192e+09	2.71287e+09	3182340417	0	69.95	77.56	78.48	75.61	75.22	90.03	66.79	84.8	72.57	67.88	70.94	39.97	3.844e-07	6.66475e-08	4.54098e-08	1.0442e-07	1.0371e-07	3.8235e-09	7.74822e-07	1.05962e-08	2.10273e-07	5.784e-07	3.06044e-07	0.000362495	3	2	3	3	3	2	2	3	3
AQQALVQKR		P19511	ATP synthase subunit b, mitochondrial OS=Rattus norvegicus GN=Atp5f1 PE=1 SV=1 - [AT5F1_RAT]	1041.62	0	1.45015e+07	0	3.31454e+07	0	0	0	0	0	3.03704e+07	0	0		48.47		47.22						46.55				2.27573e-05		3.03473e-05						3.54095e-05				2		2
HVIQSISAQQEKETIAK		P19511	ATP synthase subunit b, mitochondrial OS=Rattus norvegicus GN=Atp5f1 PE=1 SV=1 - [AT5F1_RAT]	1910.03	9.28776e+07	0	3.05593e+08	1.66177e+08	157984272	1.53989e+08	314351141	0	2.89408e+08	1.43746e+08	163834639	2.54073e+08	84.07		72.65	50.9	46.73	57.51	75.25		91.77	52.31	72.35	83.65	1.9783e-08		2.28165e-07	3.65774e-05	9.34228e-05	8.60482e-06	1.31357e-07		2.9272e-09	2.84932e-05	2.61946e-07	2.09287e-08	3		3	3	3	3	3		3
HYLFDVQR		P19511	ATP synthase subunit b, mitochondrial OS=Rattus norvegicus GN=Atp5f1 PE=1 SV=1 - [AT5F1_RAT]	1077.54	0	0	50312140	0	0	2.60011e+07	0	0	60845051	0	0	3.52049e+07			33.18			35.49			31.9			33.22			0.00209165			0.0011582			0.00290544			0.00207247			2			2			2
KAQAQPIM		P19511	ATP synthase subunit b, mitochondrial OS=Rattus norvegicus GN=Atp5f1 PE=1 SV=1 - [AT5F1_RAT]	886.482	0	4.0999e+07	0	136409624	0	161485300	191630916	0	208568944	97638210	64995416	0		55.47		45.29		36.26	43.03		50.46	42.59	45.68			2.83792e-06		3.54961e-05		0.00028391	5.97285e-05		1.0794e-05	6.60969e-05	2.69755e-05			2		2		2	2		2
NRLDYHISVQDMMR		P19511	ATP synthase subunit b, mitochondrial OS=Rattus norvegicus GN=Atp5f1 PE=1 SV=1 - [AT5F1_RAT]	1777.85	0	0	153504223	1.14902e+08	0	0	0	1.69762e+08	0	71305561	0	102708170			31.72	35.96			47.18	37.14		44.51		44.57			0.00339853	0.00128024			9.66699e-05	0.000975644		0.000157529		0.000181553			3	3			3	3
QIQDAINR		P19511	ATP synthase subunit b, mitochondrial OS=Rattus norvegicus GN=Atp5f1 PE=1 SV=1 - [AT5F1_RAT]	957.512	0	0	0	2.5784e+07	0	0	7.92523e+07	0	93849022	0	16359246	1.36086e+07				52.96			60.69		56.45		54.56	52.09				9.35776e-06			1.49293e-06		4.18959e-06		6.9989e-06	1.23603e-05				2			2		2
QIQDAINREK		P19511	ATP synthase subunit b, mitochondrial OS=Rattus norvegicus GN=Atp5f1 PE=1 SV=1 - [AT5F1_RAT]	1214.65	0	1.54249e+07	2.02456e+08	0	0	1.16291e+08	146127438	2.82659e+06	0	8.7378e+07	0	6.61489e+07		46.99	30.66			44.02	41.1	30.62		44.44		40.47		7.39949e-05	0.00377966			0.000146623	0.000287211	0.00320776		0.000133107		0.000332049		2	2			2	2	2
RKEGEHMINWVEK		P19511	ATP synthase subunit b, mitochondrial OS=Rattus norvegicus GN=Atp5f1 PE=1 SV=1 - [AT5F1_RAT]	1655.83	0	0	0	52718054	6.07219e+07	0	5.34368e+07	0	0	0	0	0				31.44	31.41		38.57									0.00369664	0.00368613		0.000736675									3	3		3
AIAELGIYPAVDPLDSTSR		P10719	ATP synthase subunit beta, mitochondrial OS=Rattus norvegicus GN=Atp5b PE=1 SV=2 - [ATPB_RAT]	1988.04	0	1.47067e+07	6.25021e+08	238788385	1.35692e+09	1350908124	0	0	2.38877e+08	227996525	2.99439e+08	2.17695e+08		57.19	51.52	60.05	53.65	46.27			68.81	33.59	53.46	62.01		1.47059e-05	5.56708e-05	7.61186e-06	3.36585e-05	0.000184117			1.02588e-06	0.00336892	2.95285e-05	4.8472e-06		2	2	2	2	2			2
FLSQPFQVAEVFTGHMGK	M16(Oxidation)	P10719	ATP synthase subunit beta, mitochondrial OS=Rattus norvegicus GN=Atp5b PE=1 SV=2 - [ATPB_RAT]	2039.01	2.1975e+08	0	636872250	3.64311e+08	1.46994e+09	1.06973e+09	3.36598e+08	0	3.02472e+08	3.55233e+08	5.3461e+08	4.28293e+08	35.74	32.74	54.01	51.45	65.32	64.85	65.13	39.71	43.39	65.57	54.44	62.56	0.00188014	0.00372476	2.68104e-05	5.12043e-05	1.9976e-06	2.30775e-06	2.11763e-06	0.000721612	0.000313827	1.92746e-06	2.03258e-05	3.79919e-06	3	3	3	3	3	3	3	2	3
FLSQPFQVAEVFTGHMGK		P10719	ATP synthase subunit beta, mitochondrial OS=Rattus norvegicus GN=Atp5b PE=1 SV=2 - [ATPB_RAT]	2023.01	7.62598e+08	3.22117e+06	3.72411e+09	1.61847e+09	6.40737e+09	3.55249e+09	1.51718e+09	8.13667e+08	1.20347e+09	1184122631	1.49006e+09	2.02373e+09	58.48	82.32	85.8	68.82	79.44	83.33	76.22	71.13	79.63	72.51	83.81	74.58	1.27006e-05	5.15802e-08	2.14367e-08	1.21378e-06	9.89736e-08	3.8787e-08	2.0774e-07	6.55268e-07	9.25591e-08	5.3019e-07	3.66001e-08	3.01312e-07	3	3	3	3	3	3	3	3	3
FTQAGSEVSALLGR		P10719	ATP synthase subunit beta, mitochondrial OS=Rattus norvegicus GN=Atp5b PE=1 SV=2 - [ATPB_RAT]	1435.75	0	0	6.64408e+07	0	0	1.30211e+08	4.98812e+07	0	49468989	29069188	0	0			107.84			32.68	54.4		115.01	84.36					9.12626e-11			0.00256268	1.77908e-05		1.54595e-11	2.19863e-08					2			2	2		2
IGLFGGAGVGK		P10719	ATP synthase subunit beta, mitochondrial OS=Rattus norvegicus GN=Atp5b PE=1 SV=2 - [ATPB_RAT]	975.568	0	0	0	2.65721e+07	44937207	7.29717e+07	53024652	0	43545278	0	2.67121e+07	16287581				38.05	59.77	39.45	47.18		50.65	34.22	44.79	44.65				0.00043869	2.89956e-06	0.000374554	5.2642e-05		2.41078e-05	0.00104072	7.46763e-05	9.5975e-05				2	2	2	2		2
ILQDYK		P10719	ATP synthase subunit beta, mitochondrial OS=Rattus norvegicus GN=Atp5b PE=1 SV=2 - [ATPB_RAT]	779.431	2.73055e+07	1.27177e+08	0	9.68352e+07	0	0	0	0	1.64224e+08	6.9237e+07	118851319	0	32.78	31.14		33.65					33.69	31.28	32.96		0.00216164	0.0032688		0.00183396					0.00181714	0.00316511	0.00214975		2	2		2					2
IMDPNIVGSEHYDVAR		P10719	ATP synthase subunit beta, mitochondrial OS=Rattus norvegicus GN=Atp5b PE=1 SV=2 - [ATPB_RAT]	1815.86	0	1.52658e+07	3.71772e+08	5.47706e+08	3166116984	2.24293e+09	599697482	7.33932e+07	517381373	4.91765e+08	6.45567e+08	4.92362e+08	74.25	86.48	82.42	105.98	119.79	112.51	106.22	105.9	112	87.89	126.26	87.94	2.02952e-07	1.07955e-08	2.74942e-08	1.21127e-10	4.8279e-12	2.60887e-11	1.14615e-10	1.23379e-10	3.0286e-11	7.80263e-09	1.17113e-12	7.63297e-09	3	2	2	2	2	2	2	2	2
IMNVIGEPIDER		P10719	ATP synthase subunit beta, mitochondrial OS=Rattus norvegicus GN=Atp5b PE=1 SV=2 - [ATPB_RAT]	1385.71	0	1.6848e+07	92867940	8.88017e+07	0	412131435	4.28053e+07	0	1.59433e+08	6.06281e+07	110411291	0		73.87	42.28	60.99		57.52	59.42		56.94	53.68	57.32			2.05102e-07	0.000254372	3.38368e-06		7.96549e-06	5.14295e-06		1.01151e-05	1.5642e-05	7.87751e-06			2	2	2		2	2		2
IMNVIGEPIDERGPIK		P10719	ATP synthase subunit beta, mitochondrial OS=Rattus norvegicus GN=Atp5b PE=1 SV=2 - [ATPB_RAT]	1780.96	0	0	4.0866e+08	2.66476e+08	0	8.32472e+08	4.7655e+08	0	3.65888e+08	0	0	2.61008e+07	46.54	31.52	40.07	53.36	50.21	58.72	49.94		46.48	47.51	48.2	43.01	8.65097e-05	0.00310065	0.000432965	2.07593e-05	4.1923e-05	5.9753e-06	4.35982e-05		9.44603e-05	7.80643e-05	6.2056e-05	0.000192513	3	3	2	2	3	2	2		2
IMNVIGEPIDERGPIKTK	M2(Oxidation)	P10719	ATP synthase subunit beta, mitochondrial OS=Rattus norvegicus GN=Atp5b PE=1 SV=2 - [ATPB_RAT]	2026.1	0	0	0	0	4.71893e+08	312908537	0	0	0	3.68127e+07	7.16181e+07	0					36.9	35.81				40.48	37.99						0.000939199	0.00120714				0.000407391	0.000627476						3	3
IMNVIGEPIDERGPIKTK		P10719	ATP synthase subunit beta, mitochondrial OS=Rattus norvegicus GN=Atp5b PE=1 SV=2 - [ATPB_RAT]	2010.12	5.57554e+08	3.64614e+06	0	7.15353e+08	0	0	488989175	2.32961e+07	6.56413e+08	4.49845e+08	8.84321e+08	582771322	37.25	37.78	34.03	41.53	44.79	49.38	37.52	40.14	34.58	31.56	50.43	45.57	0.000555676	0.000491838	0.00138378	0.00019686	9.45899e-05	4.03709e-05	0.000619538	0.000285642	0.0010276	0.00219943	2.58134e-05	8.45863e-05	3	3	2	3	2	2	3	3	3
IPSAVGYQPTLATDMGTMQER		P10719	ATP synthase subunit beta, mitochondrial OS=Rattus norvegicus GN=Atp5b PE=1 SV=2 - [ATPB_RAT]	2266.08	0	0	7.06284e+07	0	8.96531e+07	1.31901e+08	4.23607e+07	0	5.47815e+07	0	4.20624e+07	0		53.48	35.01		43.78	54.59	48.22		54.97		47.32			2.69247e-05	0.0020192		0.000251276	2.32849e-05	9.34096e-05		1.86276e-05		0.000111212			2	2		2	2	2		2
KGSITSVQAIYVPADDLTDPAPATTFAHLDATTVLSR		P10719	ATP synthase subunit beta, mitochondrial OS=Rattus norvegicus GN=Atp5b PE=1 SV=2 - [ATPB_RAT]	3842.98	0	0	0	0	4.07027e+08	2.28852e+08	0	0	0	0	8.04555e+07	0			32.23		30.42	34.82					34.75				0.00430856		0.00581005	0.0021095					0.00224427				3		3	3
LVLEVAQHLGESTVR		P10719	ATP synthase subunit beta, mitochondrial OS=Rattus norvegicus GN=Atp5b PE=1 SV=2 - [ATPB_RAT]	1650.91	0	0	0	2.21959e+08	1074907572	992624414	2.88864e+08	327468305	1.10413e+08	0	3.5569e+08	0			55.55	91.19	92.19	87.64	83.12	84.16	70.96	60.84	86.93	50.99			1.07266e-05	2.88924e-09	2.44599e-09	7.23185e-09	1.7551e-08	1.41972e-08	2.88604e-07	2.9669e-06	6.58997e-09	2.82637e-05			3	2	2	2	2	2	2
LVPLKETIK		P10719	ATP synthase subunit beta, mitochondrial OS=Rattus norvegicus GN=Atp5b PE=1 SV=2 - [ATPB_RAT]	1040.67	0	1.653e+08	8.95179e+08	0	1599905695	1.79777e+09	0	0	6.33641e+08	2.21178e+08	0	0		37.5	32.08		33.64	32.97			32.78	32.02				0.000177407	0.000617974		0.000431489	0.000503466			0.000525981	0.000626571				2	2		2	2			2
SLQDIIAILGMDELSEEDKLTVSR		P10719	ATP synthase subunit beta, mitochondrial OS=Rattus norvegicus GN=Atp5b PE=1 SV=2 - [ATPB_RAT]	2675.38	0	0	1.01873e+08	102491432	3.15084e+08	3.48295e+08	0	0	1.54131e+08	0	0	0			42.04	39.95	40.41	62.92	34.55	38.9	68.45		42.93				0.000431369	0.000728337	0.00063239	3.36933e-06	0.00242019	0.000895333	9.93081e-07		0.000351438				3	3	3	3	2	2	3
TIAMDGTEGLVR	M4(Oxidation)	P10719	ATP synthase subunit beta, mitochondrial OS=Rattus norvegicus GN=Atp5b PE=1 SV=2 - [ATPB_RAT]	1278.64	0	7.67957e+07	0	0	0	2.95195e+08	0	0	1.74355e+07	0	4.20019e+07	0		81.37				57.74			52.16		52.04			3.5014e-08				8.07684e-06			2.97986e-05		3.06335e-05			2				2			2
TIAMDGTEGLVR		P10719	ATP synthase subunit beta, mitochondrial OS=Rattus norvegicus GN=Atp5b PE=1 SV=2 - [ATPB_RAT]	1262.64	3.01261e+08	2.6228e+08	0	284654043	0	11695400	392042637	0	0	0	3.31323e+08	258246967	61.03	69.3		69.86		79.33	66.5				62.57	58.21	4.10207e-06	5.1108e-07		5.21545e-07		5.48401e-08	1.14175e-06				2.62841e-06	7.77691e-06	2	2		2		2	2
TIAMDGTEGLVRGQK		P10719	ATP synthase subunit beta, mitochondrial OS=Rattus norvegicus GN=Atp5b PE=1 SV=2 - [ATPB_RAT]	1575.81	0	1.72983e+07	60341737	0	419501006	2.90652e+08	0	8.71844e+06	0	35720616	0	2.42455e+07		77.54	77.74		83.37	83.4		80.05		83.23		39.26		1.03957e-07	9.92778e-08		2.80757e-08	2.83395e-08		5.83246e-08		2.70941e-08		0.000729248		2	2		2	2		2
TREGNDLYHEMIESGVINLKDATSK		P10719	ATP synthase subunit beta, mitochondrial OS=Rattus norvegicus GN=Atp5b PE=1 SV=2 - [ATPB_RAT]	2820.38	0	0	0	8.23883e+07	4.21895e+08	0	0	2.96837e+07	8.8187e+07	58894197	0	74908754	58.17		44.39	52.45	60.91	66.26	43.07	48.2	58.5	42.58	43.56	55.78	1.34879e-05		0.000331163	4.94902e-05	7.3392e-06	2.09384e-06	0.000441391	0.000136977	1.25716e-05	0.000505151	0.000400905	2.35174e-05	4		3	4	4	3	3	4	4
VALVYGQMNEPPGAR		P10719	ATP synthase subunit beta, mitochondrial OS=Rattus norvegicus GN=Atp5b PE=1 SV=2 - [ATPB_RAT]	1601.81	140932246	2.69984e+07	1.62021e+08	0	3.13551e+08	177985273	9.22897e+07	0	7.74563e+07	0	0	5.40341e+07	41.17	47.51	82.92		82.99	32.79	83.15		65.91			66.53	0.000496493	9.84675e-05	3.0375e-08		3.18988e-08	0.00286679	3.05029e-08		1.50022e-06			1.3451e-06	2	2	2		2	2	2		2
VLDSGAPIKIPVGPETLGR		P10719	ATP synthase subunit beta, mitochondrial OS=Rattus norvegicus GN=Atp5b PE=1 SV=2 - [ATPB_RAT]	1919.1	0	2.17784e+06	1.98478e+09	6.22441e+08	8002081406	6.301e+09	0	0	1.87846e+09	1049582378	0	3.47468e+08	68.1	39.32	67.24	55.02	53.39	57.53	47.74		51.78	50.99	58.98	56.2	2.47811e-07	0.000216357	3.87038e-07	5.66595e-06	8.24655e-06	3.26717e-06	2.77641e-05		1.12836e-05	1.35347e-05	2.27653e-06	4.91761e-06	3	2	2	2	2	2	3		2
VVDLLAPYAK		P10719	ATP synthase subunit beta, mitochondrial OS=Rattus norvegicus GN=Atp5b PE=1 SV=2 - [ATPB_RAT]	1088.63	0	0	0	0	0	1.04533e+08	70168447	0	0	0	3.43583e+07	0						41.1	36.68				37.68							0.000228993	0.00063361				0.000503294							2	2
ANVDKPGLVDDFK		P31399	ATP synthase subunit d, mitochondrial OS=Rattus norvegicus GN=Atp5h PE=1 SV=3 - [ATP5H_RAT]	1417.73	0	0	0	1.20127e+08	0	90929120	0	0	0	0	45393904	7.82065e+07				34.43		42.51					34.45	32.96				0.00180289		0.000305771					0.00193818	0.00247854				2		2
ANVDKPGLVDDFKNK		P31399	ATP synthase subunit d, mitochondrial OS=Rattus norvegicus GN=Atp5h PE=1 SV=3 - [ATP5H_RAT]	1659.87	0	0	1.70309e+08	134042988	110260515	105735455	2.03906e+08	0	1.81027e+08	1.05361e+08	1.17732e+08	113998199			55.33	55.31	62.19	61.18	59.16		53.57	55.08	59.13	50.58			1.68526e-05	1.78138e-05	3.65389e-06	4.61058e-06	7.341e-06		2.65923e-05	1.87826e-05	7.39189e-06	5.1624e-05			3	3	3	3	3		3
ANVDKPGLVDDFKNKYNALK		P31399	ATP synthase subunit d, mitochondrial OS=Rattus norvegicus GN=Atp5h PE=1 SV=3 - [ATP5H_RAT]	2249.18	0	0	1.1703e+08	0	0	0	0	0	0	0	7.7678e+07	0			66.41						66.44		54.29	43.2			1.23422e-06						1.40732e-06		2.04815e-05	0.000296751			3						3
IKNMIPFDQMTIDDLNEVFPETK	N3(Deamidated)	P31399	ATP synthase subunit d, mitochondrial OS=Rattus norvegicus GN=Atp5h PE=1 SV=3 - [ATP5H_RAT]	2739.32	0	0	2.41999e+07	0	3.47018e+07	0	0	0	16532245	0	2.58864e+07	5.04118e+06			48.14		59.72	78.44			36.93		62.04	35.82			0.000138883		9.65269e-06	1.35342e-07			0.00193644		5.65781e-06	0.00243491			3		3	3			3
IKNMIPFDQMTIDDLNEVFPETK	M4(Oxidation)	P31399	ATP synthase subunit d, mitochondrial OS=Rattus norvegicus GN=Atp5h PE=1 SV=3 - [ATP5H_RAT]	2754.33	16400645	0	81120435	5.61747e+07	88651706	9.3863e+07	0	0	0	7.57906e+07	1.06287e+08	0	46.12		67.95	62.11	83.53	52.99				78.22	78.25		0.000215022		1.40284e-06	5.44432e-06	3.79285e-08	4.37038e-05				1.32581e-07	1.27928e-07		3		3	3	3	3
IKNMIPFDQMTIDDLNEVFPETK		P31399	ATP synthase subunit d, mitochondrial OS=Rattus norvegicus GN=Atp5h PE=1 SV=3 - [ATP5H_RAT]	2738.34	0	7477945	1862269372	1161627042	1334564064	1.02471e+09	6.15218e+08	5.60519e+07	8.37896e+08	8.40698e+08	9.48087e+08	979003886		78.71	49.2	53.53	66.18	76.35	75.68	78.5	66.57	94.88	94.85	78.25		1.29876e-07	0.000113013	4.36955e-05	2.28941e-06	2.2247e-07	2.56876e-07	1.34191e-07	2.11481e-06	3.20211e-09	3.06064e-09	1.45883e-07		3	3	3	3	3	3	3	3
IKNMIPFDQMTIDDLNEVFPETKLDKR		P31399	ATP synthase subunit d, mitochondrial OS=Rattus norvegicus GN=Atp5h PE=1 SV=3 - [ATP5H_RAT]	3250.65	0	0	4.84542e+07	0	0	1.06944e+08	0	0	0	6.70542e+07	100752034	6.30104e+07			37.47			35.94				38.79	37.72	32.24			0.00157573			0.00213934				0.0011231	0.0015383	0.00510465			4			4
LASLSEKPPAIDWAYYR		P31399	ATP synthase subunit d, mitochondrial OS=Rattus norvegicus GN=Atp5h PE=1 SV=3 - [ATP5H_RAT]	1980.02	0	0	2.67233e+09	0	0	1.29525e+09	1.51686e+09	43342711	1550899930	0	1.06814e+09	0	47.22		65.75	74.66	57.69	58.79	56.86	57.49	55.19	51.44	55.09	51.68	0.000136563		2.02215e-06	2.35966e-07	1.17449e-05	1.01079e-05	1.57638e-05	1.22984e-05	2.17938e-05	5.16812e-05	2.38501e-05	4.82235e-05	3		2	3	3	2	2	2	2
NCAQFVTGSQAR	C2(Methylthio)	P31399	ATP synthase subunit d, mitochondrial OS=Rattus norvegicus GN=Atp5h PE=1 SV=3 - [ATP5H_RAT]	1327.59	0	3.16587e+07	3.97992e+08	0	0	1.49145e+08	4.12624e+08	7.92594e+07	2.83564e+08	178351462	2.98527e+08	0		68.15	84.73			75.96	74.82	74.59	39.11	74.75	84.75			2.83251e-07	6.73023e-09			5.07026e-08	6.09778e-08	6.42942e-08	0.000233213	6.19686e-08	6.19686e-09			2	2			2	2	2	2
SWNETFHTR		P31399	ATP synthase subunit d, mitochondrial OS=Rattus norvegicus GN=Atp5h PE=1 SV=3 - [ATP5H_RAT]	1177.54	1.72919e+08	0	8.59043e+08	5.63794e+08	0	0	0	0	0	4.76482e+08	515887813	511355488	34.84	32.85	36.7	38.06	36.73	36.83	38.13	33.12		33.35	33.32	33.2	0.000803833	0.0014267	0.00058794	0.000429866	0.000594508	0.000539478	0.000422993	0.00131633		0.00127155	0.00114069	0.0012923	2	2	2	2	3	3	3	3
VREYEKQLEK		P31399	ATP synthase subunit d, mitochondrial OS=Rattus norvegicus GN=Atp5h PE=1 SV=3 - [ATP5H_RAT]	1321.71	0	1.09812e+07	0	0	137778263	0	0	0	4.79962e+07	9.80166e+07	5.74036e+07	75984208		34.87	47.18		31.36				36.45	32.05	39.39	31.9		0.00112414	6.60418e-05		0.00252243				0.000781302	0.00215189	0.000385518	0.00222751		3	2		3				3
ELAEAEDVSIFK		P29419	ATP synthase subunit e, mitochondrial OS=Rattus norvegicus GN=Atp5i PE=1 SV=3 - [ATP5I_RAT]	1350.68	0	0	0	0	29225220	0	0	69762289	1.3613e+08	0	0	5.72982e+07					45.28			35.77	44.79			50.15					0.000149724			0.00162883	0.000165947			4.87856e-05					2			2	2
IERELAEAEDVSIFK		P29419	ATP synthase subunit e, mitochondrial OS=Rattus norvegicus GN=Atp5i PE=1 SV=3 - [ATP5I_RAT]	1748.91	0	0	5.87223e+07	0	6.97451e+07	0	8.87835e+07	0	0	5.30038e+07	4.98438e+07	8.53466e+07			59.69		63.87		62.71	62.15	47.9	76.65	69.81	61.98			7.78642e-06		2.95347e-06		3.85774e-06	4.41914e-06	0.000117581	1.56797e-07	7.78317e-07	4.59556e-06			2		2		2	3	3
KRLDELKR		P29419	ATP synthase subunit e, mitochondrial OS=Rattus norvegicus GN=Atp5i PE=1 SV=3 - [ATP5I_RAT]	1057.65	921688	0	0	4.77086e+07	0	0	0	0	0	2.62057e+07	2.64157e+07	1.45826e+07	38.36			41.2	43.51	53.18			30.68	42.3	51.72	46.68	0.000291763			0.000155508	9.13595e-05	9.61679e-06			0.00171013	0.00013249	1.5142e-05	4.40305e-05	2			2	3	3			3
RIERELAEAEDVSIFK		P29419	ATP synthase subunit e, mitochondrial OS=Rattus norvegicus GN=Atp5i PE=1 SV=3 - [ATP5I_RAT]	1905	0	0	0	0	0	0	0	1.26559e+08	0	0	6.39532e+07	9.87882e+07							30.48	33.98			43.8	42.89							0.00613325	0.00207971			0.000204266	0.000267303							2	3
ATLKDITR		P35435	ATP synthase subunit gamma, mitochondrial OS=Rattus norvegicus GN=Atp5c1 PE=1 SV=2 - [ATPG_RAT]	917.541	0	6.16082e+07	5.86254e+08	2.84822e+08	322422858	2.52838e+08	347868122	9.1756e+06	546596389	2.13243e+08	2.23202e+08	236688278		56.32	60.31	60.07	58.11	57.8	59.96	59.84	60.28	57.33	57.89	57.86		6.30034e-06	2.51399e-06	3.19804e-06	5.02208e-06	4.48088e-06	3.28007e-06	2.80133e-06	2.53142e-06	4.99303e-06	5.28303e-06	5.31965e-06		2	2	2	2	2	2	2	2
HLIIGVSSDR		P35435	ATP synthase subunit gamma, mitochondrial OS=Rattus norvegicus GN=Atp5c1 PE=1 SV=2 - [ATPG_RAT]	1096.61	0	0	254069736	80671845	80982518	7.73117e+07	1.6266e+08	0	143032594	7.93604e+07	1.39194e+08	1.23414e+08			64.97	36.57	47.38	57.84	41.57		56.94	52.59	56.55	51.48			8.59733e-07	0.000627834	5.21009e-05	4.4398e-06	0.000198539		5.46215e-06	1.5698e-05	5.97536e-06	1.92028e-05			2	2	2	2	2		2
MTAMDNASK		P35435	ATP synthase subunit gamma, mitochondrial OS=Rattus norvegicus GN=Atp5c1 PE=1 SV=2 - [ATPG_RAT]	968.417	0	6.93186e+06	0	0	0	3.11579e+07	5.92912e+07	0	0	0	0	2.2946e+07		32.25				30.91	49.94					48.76		0.00101263				0.00133809	1.72365e-05					2.12873e-05		2				2	2
MTAMDNASKNASDMIDKLTLTFNR		P35435	ATP synthase subunit gamma, mitochondrial OS=Rattus norvegicus GN=Atp5c1 PE=1 SV=2 - [ATPG_RAT]	2688.28	0	0	1.74175e+08	9.59932e+07	1.20278e+08	77892172	4.15887e+07	4.29759e+07	5.38699e+07	5.99094e+07	5.69276e+07	8.73179e+07			63.46	74.59	75.67	52.07	67.34	67.87	88.73	86.26	85.35	80.6			2.8176e-06	2.1721e-07	1.70742e-07	4.12878e-05	1.19003e-06	1.01249e-06	8.57393e-09	1.58517e-08	1.75046e-08	5.83546e-08			3	3	3	3	3	3	3
NASDMIDKLTLTFNR		P35435	ATP synthase subunit gamma, mitochondrial OS=Rattus norvegicus GN=Atp5c1 PE=1 SV=2 - [ATPG_RAT]	1738.88	14984328	0	2.00939e+08	1.36043e+08	1.05422e+08	80636857	1.87161e+08	8.34986e+07	1.8588e+08	73688367	177086164	1.36056e+08	53.83		64.04	74.99	100.85	49.24	82.27	93.43	122.14	58.75	101.03	95.07	2.4633e-05		2.40619e-06	2.13946e-07	5.63236e-10	8.04088e-05	3.73543e-08	3.06411e-09	4.12386e-12	8.40119e-06	4.7726e-10	1.82035e-09	2		2	2	2	2	2	2	2
VYGTGSLALYEK		P35435	ATP synthase subunit gamma, mitochondrial OS=Rattus norvegicus GN=Atp5c1 PE=1 SV=2 - [ATPG_RAT]	1300.68	0	0	0	0	4.62331e+07	6.93776e+07	0	3.50943e+07	1.39832e+08	0	0	0					33.95	53.66		35.48	40.62								0.00253712	2.3679e-05		0.00155727	0.000403137								2	2		2	2
IGEKYVDMSAK		Q06647	ATP synthase subunit O, mitochondrial OS=Rattus norvegicus GN=Atp5o PE=1 SV=1 - [ATPO_RAT]	1240.62	0	1.38061e+07	1.63065e+08	1.28137e+08	0	114751834	54780167	0	0	85963101	0	0		56.45	31.22	51.26		57.55	52.86	45.07		53.95				8.71888e-06	0.00290711	2.35673e-05		6.9438e-06	1.99279e-05	0.000119801		1.55046e-05				2	2	2		2	2	3
LDQVEKELLR		Q06647	ATP synthase subunit O, mitochondrial OS=Rattus norvegicus GN=Atp5o PE=1 SV=1 - [ATPO_RAT]	1242.71	0	0	0	1.26359e+08	0	9.19555e+07	0	0	1.86023e+08	6.85492e+07	0	8.99161e+07				81.62		81.33			80.84	75.65		81.14				2.47915e-08		2.94483e-08			3.17293e-08	1.04824e-07		2.73041e-08				2		2			2
LVRPPVQVYGIEGR		Q06647	ATP synthase subunit O, mitochondrial OS=Rattus norvegicus GN=Atp5o PE=1 SV=1 - [ATPO_RAT]	1582.9	8.82719e+07	0	939654650	736655626	0	0	677875711	3.76037e+07	649771032	492930472	8.34984e+08	3.55498e+08	50.7		50.85	46.48	47.53	42.75	52	50.15	60.61	54.5	48.29	53.65	2.38319e-05		2.01449e-05	6.29735e-05	4.8566e-05	0.000151302	1.64049e-05	2.46343e-05	2.2593e-06	8.69293e-06	4.37343e-05	1.25141e-05	3		3	3	2	2	3	3	3
RLDQVEKELLR		Q06647	ATP synthase subunit O, mitochondrial OS=Rattus norvegicus GN=Atp5o PE=1 SV=1 - [ATPO_RAT]	1398.81	0	0	0	369772515	0	0	1.92491e+08	0	3.98991e+08	0	297091796	265091204			52.28	62.84	56.62	37.83	62.57	48.54	67.27	56.63	65.36	63.27			2.33667e-05	1.06599e-06	8.49307e-06	0.000535653	1.79839e-06	4.54866e-05	3.93749e-07	4.56267e-06	8.58662e-07	9.89052e-07			3	2	3	3	2	3	2
SLKDITTK		Q06647	ATP synthase subunit O, mitochondrial OS=Rattus norvegicus GN=Atp5o PE=1 SV=1 - [ATPO_RAT]	905.53	0	0	6.93565e+07	5.13255e+07	0	0	0	0	1.55804e+08	46451505	3.74861e+07	3.53817e+07			38.42	35.47			42.51		42.44	34.74	42.25	39.34			0.000330924	0.000454067			8.97677e-05		9.12263e-05	0.000520393	0.000137002	0.00018626			2	2			2		2
VGQLLKDPK		Q06647	ATP synthase subunit O, mitochondrial OS=Rattus norvegicus GN=Atp5o PE=1 SV=1 - [ATPO_RAT]	997.604	0	6.69334e+07	768751033	0	3.7293e+08	388399316	0	0	0	2.68194e+08	2.97813e+08	0		38.78	34.84		33.88	33.41				43.79	31.75			0.00013212	0.000327318		0.000408291	0.000454957				4.16841e-05	0.000666761			2	2		2	2
VGQLLKDPKVSLAVLNPYIK		Q06647	ATP synthase subunit O, mitochondrial OS=Rattus norvegicus GN=Atp5o PE=1 SV=1 - [ATPO_RAT]	2195.32	0	0	6.04812e+07	0	70835776	3.92379e+07	0	0	0	0	7.28483e+07	4.84703e+07			53.14		65.76	47.36					65.85	58.5			4.84139e-06		2.64832e-07	1.83219e-05					2.594e-07	1.40919e-06			3		3	3
VSLAVLNPYIK		Q06647	ATP synthase subunit O, mitochondrial OS=Rattus norvegicus GN=Atp5o PE=1 SV=1 - [ATPO_RAT]	1216.73	0	1534846	2.70241e+08	662823365	396922771	3.40469e+08	9.90822e+08	20432335	9.44385e+08	3.2157e+08	6.78248e+08	5.39716e+08		36.54	44.37	48.28	40.12	47.86	49.73	48.87	49.15	49.83	49.65	43.61		0.000388184	8.77427e-05	2.60039e-05	0.000160503	2.70075e-05	1.86225e-05	2.27006e-05	1.82428e-05	1.55988e-05	1.78848e-05	7.62146e-05		2	2	2	2	2	2	2	2
VSLAVLNPYIKR		Q06647	ATP synthase subunit O, mitochondrial OS=Rattus norvegicus GN=Atp5o PE=1 SV=1 - [ATPO_RAT]	1372.83	0	0	0	0	3.32609e+08	255843530	2.37688e+08	0	0	247604539	2.52898e+08	4.17266e+07		56.87		37.66	93.28	72.45	93.42		47.35	93.25	79.42	79.69		2.05102e-06		0.00017099	4.68781e-10	5.67505e-08	4.5391e-10		1.83641e-05	4.7203e-10	1.14017e-08	1.07145e-08		2		3	2	2	2		3
YATALYSAASK		Q06647	ATP synthase subunit O, mitochondrial OS=Rattus norvegicus GN=Atp5o PE=1 SV=1 - [ATPO_RAT]	1145.58	0	7.73913e+07	0	163090240	0	1.21615e+08	153348264	6.39513e+07	0	121980912	1.28391e+08	0		52.84		60.67		56.78	56.08	73.53	68.45	40.65	67.55			3.24997e-05		4.02808e-06		9.86502e-06	1.54127e-05	2.77255e-07	8.93059e-07	0.000460632	1.0987e-06			2		2		2	2	2	2
YATALYSAASKQK		Q06647	ATP synthase subunit O, mitochondrial OS=Rattus norvegicus GN=Atp5o PE=1 SV=1 - [ATPO_RAT]	1401.74	2.66491e+06	2.04242e+06	0	0	0	0	0	0	0	9.9757e+06	0	0	49.49	44.35								32.32			5.67926e-05	0.000174459								0.00278416			2	2
YVDMSAK		Q06647	ATP synthase subunit O, mitochondrial OS=Rattus norvegicus GN=Atp5o PE=1 SV=1 - [ATPO_RAT]	813.381	0	0	0	2.58437e+07	0	0	8.32928e+07	0	0	2.27785e+07	2.8409e+07	0				41.53			43.78			43.74	40.79					0.000130068			7.74768e-05			7.81937e-05	0.000154231					2			2
LASGGPVDTGPEYQQEVDRELFK		P21571	ATP synthase-coupling factor 6, mitochondrial OS=Rattus norvegicus GN=Atp5j PE=1 SV=1 - [ATP5J_RAT]	2535.23	0	911278	8.85239e+08	1.02279e+09	1.161e+09	1170970357	1.06112e+09	0	1.21613e+09	877268110	762730827	7.00981e+08		53.87	71.58	57.74	67.68	70.67	67.96		68.56	67.9	33.77	53.92		3.6098e-05	5.94246e-07	1.49758e-05	1.53547e-06	7.58478e-07	1.39162e-06		1.25384e-06	1.59748e-06	0.00360993	3.6293e-05		3	3	3	3	3	3		3
LFLDKIR		P21571	ATP synthase-coupling factor 6, mitochondrial OS=Rattus norvegicus GN=Atp5j PE=1 SV=1 - [ATP5J_RAT]	904.561	0	0	891254457	929073675	910504171	6.022e+08	724862682	30704527	8.69869e+08	642498733	781941966	703324375			37.1	38.13	39.39	39.46	35.94	35.64	39.9	43.5	41.47	40.39			0.000350972	0.000276868	0.00023016	0.00022648	0.000509366	0.000545796	0.000204659	8.93367e-05	0.000142571	0.000182823			2	2	2	2	2	2	2
RLASGGPVDTGPEYQQEVDRELFK		P21571	ATP synthase-coupling factor 6, mitochondrial OS=Rattus norvegicus GN=Atp5j PE=1 SV=1 - [ATP5J_RAT]	2691.33	0	0	420145216	2.76018e+08	3.94803e+08	3.05525e+08	0	3.87741e+07	0	186233765	2.37109e+08	2.63108e+08			44.3	54.22	54.13	40.79		40.1		54.72	58.71	46.06			0.000334382	3.48167e-05	3.41935e-05	0.000775324		0.000879513		3.05245e-05	1.20455e-05	0.000227923			3	3	3	3		3
HHEDEIDHHSKEIER		Q03344	ATPase inhibitor, mitochondrial OS=Rattus norvegicus GN=Atpif1 PE=2 SV=2 - [ATIF1_RAT]	1910.87	0	0	0	1.18207e+08	0	0	0	2.3119e+06	1.75518e+08	0	0	0			44.01	40.12	40.14		74.25	33.33	42.17	48.86	43.59	82.01			0.000146961	0.000359916	0.000363104		1.3906e-07	0.00169548	0.000221459	4.81063e-05	0.000159696	2.2977e-08			3	4	3		2	4	4
IKYLKNSEH	N6(Deamidated)	Q03344	ATPase inhibitor, mitochondrial OS=Rattus norvegicus GN=Atpif1 PE=2 SV=2 - [ATIF1_RAT]	1132.6	0	0	20205458	0	1.89506e+07	0	0	0	0	1.16864e+07	0	0			33.86		30.87					35.57					0.00205575		0.00491079					0.00138666					2		2
KHHEDEIDHHSKEIER		Q03344	ATPase inhibitor, mitochondrial OS=Rattus norvegicus GN=Atpif1 PE=2 SV=2 - [ATIF1_RAT]	2038.97	0	0	0	8.55955e+07	1.69485e+08	6.51354e+07	0	1.70124e+06	0	0	0	1.57554e+08				52.09	48.38	45.73		35.43	71.27	48.4		56.57				2.96648e-05	6.97014e-05	0.000128304		0.00137481	3.58295e-07	6.93811e-05		1.0574e-05				4	4	4		4	2
TREQLAALK		Q03344	ATPase inhibitor, mitochondrial OS=Rattus norvegicus GN=Atpif1 PE=2 SV=2 - [ATIF1_RAT]	1029.61	0	0	0	1.24004e+08	0	0	174009517	0	2.15e+08	0	0	128766705				30.55			33.23		30.14			31.17				0.00343609			0.00185381		0.00377628			0.00297896				2			2		2
TREQLAALKK		Q03344	ATPase inhibitor, mitochondrial OS=Rattus norvegicus GN=Atpif1 PE=2 SV=2 - [ATIF1_RAT]	1157.7	7.32386e+06	0	0	0	1.61142e+08	0	1.74254e+08	0	1.71433e+08	0	0	1.09147e+08	33.59			46.48	36.45	53.03	31.98		34.64	54.17		31.21	0.00078754			4.0483e-05	0.000407636	8.95927e-06	0.00114097		0.000618404	6.89085e-06		0.0013623	3			2	3	2	3		3
GAAAMIPGPQTVATEIR		Q9WTP0	Band 4.1-like protein 1 OS=Rattus norvegicus GN=Epb41l1 PE=1 SV=1 - [E41L1_RAT]	1682.89	0	0	0	4.02116e+07	2.91207e+07	4.46464e+07	34489192	0	5.52483e+07	0	49608573	0			63.49	34.76	50.11	61.1	62.11		62.69		60.57				1.85801e-06	0.00143704	3.94871e-05	3.37667e-06	2.46071e-06		2.07234e-06		3.7711e-06				2	2	2	2	2		2
HQASINELKR		Q9WTP0	Band 4.1-like protein 1 OS=Rattus norvegicus GN=Epb41l1 PE=1 SV=1 - [E41L1_RAT]	1195.65	0	0	0	0	0	1.9568e+07	3.66434e+07	847096	0	0	0	0			59.6		35.63	52.79	62.33	36.97							3.50873e-06		0.000806904	1.68326e-05	1.72513e-06	0.00064291							2		2	3	3	3
IKELKPEQETTPR		Q9WTP0	Band 4.1-like protein 1 OS=Rattus norvegicus GN=Epb41l1 PE=1 SV=1 - [E41L1_RAT]	1568.86	0	6.50221e+06	1.70713e+08	1.352e+08	0	0	0	4.3294e+06	2.20961e+08	1.31161e+08	9.48672e+07	0		45.45	60.86	65.88		52.71	57.71	61.94	47.15	58.87	48.92	57.13		0.000102637	2.13291e-06	9.29614e-07		1.92887e-05	6.09962e-06	2.30305e-06	6.26446e-05	4.66985e-06	4.61639e-05	6.29337e-06		3	3	3		2	2	3	3
KKIEPEAMLQSR		Q9WTP0	Band 4.1-like protein 1 OS=Rattus norvegicus GN=Epb41l1 PE=1 SV=1 - [E41L1_RAT]	1429.78	0	0	9.27804e+07	3.74809e+07	8.82566e+07	0	2.88632e+07	0	4.44911e+07	2.41787e+07	0	3.21604e+07			71.46	76.14	79.48		43.77		33.32	61.68	38.09	58.12			3.50103e-07	1.20394e-07	5.46691e-08		0.000205682		0.00251416	3.36206e-06	0.000783955	8.32518e-06			2	2	2		2		2
LQHPDMLVTK		Q9WTP0	Band 4.1-like protein 1 OS=Rattus norvegicus GN=Epb41l1 PE=1 SV=1 - [E41L1_RAT]	1181.64	0	0	3.6777e+07	0	4.62011e+07	2.08554e+07	0	0	0	2.933e+07	0	0			46.19		32.96	37.91				33.65					0.000119016		0.0023015	0.00081713				0.00198499					3		3	3
QASALIDRPAPFFER		Q9WTP0	Band 4.1-like protein 1 OS=Rattus norvegicus GN=Epb41l1 PE=1 SV=1 - [E41L1_RAT]	1717.9	0	0	0	0	6.74875e+07	0	5.09289e+07	0	0	5.65817e+07	0	0					39.06	30.95	43.73			44.94							0.000831907	0.00510239	0.000281723			0.000181154							3	2	3
RLPSSPASPSPK		Q9WTP0	Band 4.1-like protein 1 OS=Rattus norvegicus GN=Epb41l1 PE=1 SV=1 - [E41L1_RAT]	1223.67	1.79178e+07	37834916	3.52089e+08	0	2.89587e+08	262671692	0	0	3.50473e+08	0	0	1.31042e+08	42.05	38.56	41.32		42.35	35.89			37.64			32.24	0.000143459	0.00031346	0.000169718		0.000130973	0.000579672			0.00039603			0.00134333	2	2	2		2	2			2
SGKGAAAMIPGPQTVATEIR		Q9WTP0	Band 4.1-like protein 1 OS=Rattus norvegicus GN=Epb41l1 PE=1 SV=1 - [E41L1_RAT]	1955.03	1.68274e+07	0	0	0	49372562	0	0	0	0	3.072e+07	0	0	44.48				52.84					68.14			0.000174661				2.72998e-05					9.82155e-07			3				3
SLSPIIGKDVLTSTYGATAETLSTSTTTHVTK		Q9WTP0	Band 4.1-like protein 1 OS=Rattus norvegicus GN=Epb41l1 PE=1 SV=1 - [E41L1_RAT]	3280.71	0	0	6.7821e+07	0	92648196	4.65621e+07	76794710	1.41137e+08	5.88881e+07	6.57378e+07	7.83982e+07	8.93001e+07			34.49		63.77	75.79	94.72	69.11	79.05	58.58	90.77	95.56			0.00216935		2.32966e-06	1.51589e-07	1.90567e-09	7.11915e-07	6.72038e-08	7.90451e-06	4.77392e-09	1.54274e-09			3		3	3	3	3	3
VSTADSTQVDGGAPAAK		Q9WTP0	Band 4.1-like protein 1 OS=Rattus norvegicus GN=Epb41l1 PE=1 SV=1 - [E41L1_RAT]	1574.77	0	2.91474e+06	0	0	0	0	0	0	0	1.17786e+07	7.41573e+06	9.15416e+06		46.09								82.99	68.02	87.68		9.3494e-05								1.95914e-08	6.15268e-07	6.56842e-09		2
AGPTSLPLGK		Q3ZB98	Breast carcinoma-amplified sequence 1 homolog (Fragment) OS=Rattus norvegicus GN=Bcas1 PE=1 SV=2 - [BCAS1_RAT]	940.545	0	4.7221e+07	0	0	210716632	1.2944e+08	0	3.5384e+06	0	114852166	1.15935e+08	0		41.64			70.88	44.93		42.86		57.56	38.07			7.88311e-05			9.3907e-08	3.53503e-05		5.95248e-05		2.01696e-06	0.000179349			2			2	2		2
EPAPCVQQPTVEVNALQTGDKTPK	C5(Methylthio)	Q3ZB98	Breast carcinoma-amplified sequence 1 homolog (Fragment) OS=Rattus norvegicus GN=Bcas1 PE=1 SV=2 - [BCAS1_RAT]	2596.27	0	0	3.96368e+07	1.66457e+07	0	0	7.47737e+07	0	5.44666e+07	0	2.59961e+07	0			57.75	50.04			49.66		62.4		52.97				1.4102e-05	8.27345e-05			8.70554e-05		4.77615e-06		4.18869e-05				3	3			3		3
GSSQPGQAPSAGTSDTAR		Q3ZB98	Breast carcinoma-amplified sequence 1 homolog (Fragment) OS=Rattus norvegicus GN=Bcas1 PE=1 SV=2 - [BCAS1_RAT]	1674.77	0	0	0	0	0	1.82216e+07	1.10264e+07	0	0	1.20527e+07	9.97028e+06	5.03925e+06						39.4	61.1			62.45	64.35	40.28						0.000315742	2.13468e-06			1.62123e-06	1.01003e-06	0.00025783						2	2
MLDAQVQTDPVSIGPVGK		Q3ZB98	Breast carcinoma-amplified sequence 1 homolog (Fragment) OS=Rattus norvegicus GN=Bcas1 PE=1 SV=2 - [BCAS1_RAT]	1854.96	0	0	51199913	4.17016e+07	5.06373e+07	44180534	0	0	36732967	42946061	0	49520992			37.12	39.12	44.44	39.51			39.56	33.56		47			0.00122276	0.000728647	0.000224843	0.000699649			0.000708239	0.0026213		0.000119716			2	2	2	2			2
QSLGGFLK		Q3ZB98	Breast carcinoma-amplified sequence 1 homolog (Fragment) OS=Rattus norvegicus GN=Bcas1 PE=1 SV=2 - [BCAS1_RAT]	849.478	0	3.33975e+06	3.42292e+07	0	3.23839e+07	0	0	0	4.40492e+07	0	14436547	1.22406e+07		49.83	54.77		51.67				59.14		59.34	60.54		3.17176e-05	9.66937e-06		2.07635e-05				2.98652e-06		3.78341e-06	2.16355e-06		2	2		2				2
RMLDAQVQTDPVSIGPVGK		Q3ZB98	Breast carcinoma-amplified sequence 1 homolog (Fragment) OS=Rattus norvegicus GN=Bcas1 PE=1 SV=2 - [BCAS1_RAT]	2011.06	0	0	29104662	1.2426e+07	0	0	1.1766e+07	0	0	0	0	2.06227e+07			37.14	33.79			62.93					49.59			0.000840406	0.00206826			2.52119e-06					5.22028e-05			2	2			2
RTPLMAFLR		Q3ZB98	Breast carcinoma-amplified sequence 1 homolog (Fragment) OS=Rattus norvegicus GN=Bcas1 PE=1 SV=2 - [BCAS1_RAT]	1104.63	0	0	60967492	8.335e+07	76787516	4.20639e+07	6.09856e+07	0	7.38639e+07	4.56868e+07	7.29356e+07	6.65492e+07			38.85	43.77	36.75	42.69	43.6		36.18	41.51	48.23	37.96			0.000267149	0.000142718	0.000623479	0.00015879	0.000139685		0.000710922	0.000236616	5.11068e-05	0.00047187			2	2	2	2	2		2
SSKGSSQPGQAPSAGTSDTAR		Q3ZB98	Breast carcinoma-amplified sequence 1 homolog (Fragment) OS=Rattus norvegicus GN=Bcas1 PE=1 SV=2 - [BCAS1_RAT]	1976.92	1.24288e+06	6.12202e+06	1.70477e+07	1.17599e+07	1.65268e+07	0	1.29113e+07	0	0	0	0	1.72841e+07	30.63	51.93	58.59	59.31	52.1	70.9	51.53		52.16	62.82	55.14	55.31	0.00506006	3.68696e-05	8.23222e-06	6.85734e-06	3.54542e-05	4.51121e-07	4.14813e-05		3.6184e-05	3.05602e-06	1.77594e-05	1.75193e-05	3	3	3	3	3	2	3		2
FKKLDLDNSGSLSVEEFMSLPELQQNPLVQR		P63100	Calcineurin subunit B type 1 OS=Rattus norvegicus GN=Ppp3r1 PE=1 SV=2 - [CANB1_RAT]	3561.83	0	0	0	2.89644e+07	5.32162e+07	23837703	0	0	0	0	0	5.12427e+07			93.95	39.68	34.31	36.31		88.26		76.84	31.84	39.06			2.89956e-09	0.000845025	0.00283571	0.00175413		1.1196e-08		1.52155e-07	0.00454972	0.000949864			3	4	4	4		3
IYDMDKDGYISNGELFQVLK	N12(Deamidated)	P63100	Calcineurin subunit B type 1 OS=Rattus norvegicus GN=Ppp3r1 PE=1 SV=2 - [CANB1_RAT]	2349.13	0	0	0	0	0	0	32302771	0	0	3.89049e+07	0	25717804							52.65			39.1		62.74							3.61261e-05			0.000842734		3.48531e-06							3
FYFENLWSR		P11275	Calcium/calmodulin-dependent protein kinase type II subunit alpha OS=Rattus norvegicus GN=Camk2a PE=1 SV=1 - [KCC2A_RAT]	1261.6	0	0	1.42989e+08	0	56796117	4.06279e+07	1.21566e+08	2.30393e+07	1.1558e+08	5.04092e+07	0	0			50.75		43.94	57.77	51.41	58.13	41.12	52.21					2.7766e-05		0.000123112	5.93237e-06	2.20445e-05	4.69137e-06	0.000231804	1.83358e-05					2		2	2	2	2	2
ITQYLDAGGIPR		P11275	Calcium/calmodulin-dependent protein kinase type II subunit alpha OS=Rattus norvegicus GN=Camk2a PE=1 SV=1 - [KCC2A_RAT]	1303.7	0	0	3.60098e+07	0	0	0	64568918	0	0	1.96943e+07	0	0			62.55				66.53			52.29					3.16865e-06				1.08942e-06			2.89199e-05					2				2
MCDPGMTAFEPEALGNLVEGLDFHR	C2(Methylthio)	P11275	Calcium/calmodulin-dependent protein kinase type II subunit alpha OS=Rattus norvegicus GN=Camk2a PE=1 SV=1 - [KCC2A_RAT]	2795.23	0	0	1.39481e+08	0	0	0	149478356	0	0	0	9.20298e+07	0			32.25				73.35				33.12				0.00139981				1.10971e-07				0.00112132				3				3
MLTINPSKR		P11275	Calcium/calmodulin-dependent protein kinase type II subunit alpha OS=Rattus norvegicus GN=Camk2a PE=1 SV=1 - [KCC2A_RAT]	1059.6	2.98521e+07	1.75961e+07	4.30639e+08	3.01069e+08	1.88667e+08	2.24591e+08	266086148	0	4.6911e+08	1.14897e+08	2.28378e+08	1.34667e+08	44.49	48.45	47.4	52.01	43.79	52.51	59.67		56.1	49.2	63.08	56.76	0.000240051	9.64503e-05	0.000100993	3.27343e-05	0.000282035	3.78707e-05	7.28289e-06		1.65693e-05	6.07144e-05	3.32127e-06	1.15975e-05	2	2	2	2	2	2	2		2
LTQYIDGQGRPR		P08413	Calcium/calmodulin-dependent protein kinase type II subunit beta OS=Rattus norvegicus GN=Camk2b PE=1 SV=1 - [KCC2B_RAT]	1403.74	0	0	0	0	6.16292e+07	4.97426e+07	0	0	7.95039e+07	0	4.84886e+07	0				32.23	38.39	40.04			34.47		34.78					0.00341095	0.0008258	0.000564774			0.00171491		0.00163003					3	2	2			2
NLINQMLTINPAKR		P08413	Calcium/calmodulin-dependent protein kinase type II subunit beta OS=Rattus norvegicus GN=Camk2b PE=1 SV=1 - [KCC2B_RAT]	1625.91	1.13218e+07	0	9.72275e+07	1.24293e+08	7.04467e+07	46344697	0	0	1.04197e+08	0	7.09322e+07	6.21531e+07	50.36		50.5	53.31	49.89	50.66	88.96		58.13	88.65	50.61	53.99	2.99146e-05		2.31725e-05	1.56331e-05	3.17952e-05	2.79179e-05	4.06584e-09		4.999e-06	4.57135e-09	2.2593e-05	1.33673e-05	3		3	3	3	3	2		3
FTDEYQLFEELGKGAFSVVR		P15791	Calcium/calmodulin-dependent protein kinase type II subunit delta OS=Rattus norvegicus GN=Camk2d PE=1 SV=1 - [KCC2D_RAT]	2335.17	0	0	0	2.2751e+06	7.29761e+06	0	0	0	0	0	0	7.1315e+06				65.78	59.76	48.74						60.58				2.40459e-06	9.66988e-06	0.00011762						8.2686e-06				3	3	3
ITASEALKHPWICQR	C13(Methylthio)	P15791	Calcium/calmodulin-dependent protein kinase type II subunit delta OS=Rattus norvegicus GN=Camk2d PE=1 SV=1 - [KCC2D_RAT]	1798.91	0	0	50155561	4.5678e+07	3.89053e+07	0	0	0	2.85831e+07	28114774	59803716	3.36825e+07			34.28	60.27	36.5				41.28	33.15	33.03	43.76			0.00229549	5.73231e-06	0.00135443				0.000454287	0.0030987	0.00318552	0.000262954			3	3	3				3
ELGTVMR		P62161	Calmodulin OS=Rattus norvegicus GN=Calm1 PE=1 SV=2 - [CALM_RAT]	805.423	0	2.89957e+07	0	0	0	6.56841e+07	0	0	1.43609e+08	8.47738e+07	0	0		53.48				50.55			50.64	50.41				1.99692e-05				3.83256e-05			3.75396e-05	3.95812e-05				2				2			2
KMKDTDSEEEIREAFR		P62161	Calmodulin OS=Rattus norvegicus GN=Calm1 PE=1 SV=2 - [CALM_RAT]	1983.93	0	0	1.6493e+08	64005160	0	0	0	8.00247e+07	1.62663e+08	7.726e+07	0	128552025			39.51	31.71				37.46	41.89	44.4		40.7			0.000632482	0.00411462				0.00113068	0.000355928	0.000203324		0.000519194			3	3				3	3
VFDKDGNGYISAAELR	N7(Deamidated)	P62161	Calmodulin OS=Rattus norvegicus GN=Calm1 PE=1 SV=2 - [CALM_RAT]	1755.85	3.25769e+07	0	29205187	2.7225e+07	1.60534e+07	25192368	3.32675e+07	9.38165e+06	2.49729e+07	0	4.30324e+07	4.63179e+07	69.28		80.43	59.11	64.24	78.99	103	68.75	106.19		94.15	77.39	7.25897e-07		5.61554e-08	6.87366e-06	2.33556e-06	7.82333e-08	2.957e-10	8.00113e-07	1.39453e-10		2.38447e-09	1.10346e-07	2		2	2	2	2	2	2	2
GSLSGWILSK		P35565	Calnexin OS=Rattus norvegicus GN=Canx PE=1 SV=1 - [CALX_RAT]	1047.58	0	0	0	0	1.26703e+07	0	0	0	0	0	1.77517e+07	0			33.21		38.45						32.54				0.0024354		0.00060728						0.00222874				2		2
KIPNPDFFEDLEPFR		P35565	Calnexin OS=Rattus norvegicus GN=Canx PE=1 SV=1 - [CALX_RAT]	1863.93	0	0	0	0	0	0	0	0	1.626e+07	0	1.13419e+07	0			50.17						56.45		56.64				7.16401e-05						1.78907e-05		1.79919e-05				3						3
WKPPMIDNPNYQGIWKPR		P35565	Calnexin OS=Rattus norvegicus GN=Canx PE=1 SV=1 - [CALX_RAT]	2240.14	0	0	0	2.26788e+08	0	45322961	0	0	1.54554e+08	0	0	0				60.44		66.37			50.84							6.05445e-06		1.58012e-06			5.48052e-05							3		3			3
PFGCVTLGDKK	C4(Methylthio)	Q63092	CaM kinase-like vesicle-associated protein OS=Rattus norvegicus GN=Camkv PE=1 SV=1 - [CAMKV_RAT]	1210.6	0	0	8.0531e+07	0	4.81965e+07	2.81481e+07	0	0	4.8457e+07	4.30747e+07	60394438	0			44.19	51.25	46.14	30.82			38.92	36.26	31.61				0.000184817	3.63699e-05	8.63432e-05	0.00380853			0.00062193	0.00113564	0.00310608				3	2	3	3			3
TEEFCEIFR	C5(Methylthio)	Q63092	CaM kinase-like vesicle-associated protein OS=Rattus norvegicus GN=Camkv PE=1 SV=1 - [CAMKV_RAT]	1219.51	0	0	28293591	1.44938e+07	10207746	0	2.42346e+07	0	0	10318153	1.57365e+07	1.3844e+07			49.91	43.7	43.01		49.97			41.01	56.04	49.83			1.01852e-05	4.25569e-05	4.9885e-05		1.00455e-05			7.90624e-05	2.48296e-06	1.03746e-05			2	2	2		2
GSFGELALMYNTPR		P12369	cAMP-dependent protein kinase type II-beta regulatory subunit OS=Rattus norvegicus GN=Prkar2b PE=1 SV=3 - [KAP3_RAT]	1555.76	0	0	8.25735e+07	6.55193e+07	0	4.0326e+07	74252173	4.08941e+07	6.08572e+07	50474633	64033515	5.68638e+07			78.46	65.81		62.35	93.01	45.71	95.04	83.65	79.01	31.56			7.12804e-08	1.31211e-06		2.7941e-06	2.40017e-09	0.000134267	1.56664e-09	2.11444e-08	6.21735e-08	0.00349116			2	2		2	2	2	2
HQPADLLEFALQHFTR		P12369	cAMP-dependent protein kinase type II-beta regulatory subunit OS=Rattus norvegicus GN=Prkar2b PE=1 SV=3 - [KAP3_RAT]	1922.99	0	0	1.00555e+08	6.59244e+07	5.91654e+07	3.39473e+07	6.49666e+07	0	6.92135e+06	4.32619e+07	8.29575e+07	117351116			73.93	78.5	90.74	61.54	55.04		90.66	90.78	89.29	90.73			3.25684e-07	1.06647e-07	6.36718e-09	5.19077e-06	2.45963e-05		6.5285e-09	6.64304e-09	9.53861e-09	6.6777e-09			3	3	3	3	3		3
NRLQEACKDILLFK	C7(Methylthio)	P12369	cAMP-dependent protein kinase type II-beta regulatory subunit OS=Rattus norvegicus GN=Prkar2b PE=1 SV=3 - [KAP3_RAT]	1736.92	0	0	66144861	6.56114e+07	41137467	1.6231e+07	7.03812e+07	0	5.39893e+07	16043841	5.25828e+07	5.82754e+07			50.18	54.1	69.51	57.74	49.88		61.8	34.53	48.1	50.48			6.42798e-05	2.52879e-05	7.44426e-07	1.09374e-05	5.96249e-05		3.9972e-06	0.00232565	0.000101447	5.99894e-05			3	3	3	3	3		3
ALQPIVSEEEWAHTK		Q704S8	Carnitine O-acetyltransferase OS=Rattus norvegicus GN=Crat PE=1 SV=1 - [CACP_RAT]	1737.88	0	0	50913459	2.3375e+07	2.72174e+07	0	0	0	5.15906e+07	0	0	2.40407e+07			77.1	31.04	68.71				58.88			44.53			1.36489e-07	0.00613896	9.82478e-07				9.12408e-06			0.00023785			3	3	3				3
LPVPPLQQSLDHYLK		Q704S8	Carnitine O-acetyltransferase OS=Rattus norvegicus GN=Crat PE=1 SV=1 - [CACP_RAT]	1747.97	0	0	169708452	1.48218e+08	125085762	1.01327e+08	1.9791e+08	0	1.76868e+08	9.29864e+07	1.77189e+08	115629405			59.39	46.37	45.88	48.52	54.39		47.43	32.27	53.64	50.37			3.62502e-06	6.92024e-05	8.39235e-05	4.85086e-05	1.14633e-05		6.23475e-05	0.00177878	1.36242e-05	3.857e-05			3	3	3	3	3		3
LAEPSQMLK		Q9WU82	Catenin beta-1 OS=Rattus norvegicus GN=Ctnnb1 PE=1 SV=1 - [CTNB1_RAT]	1016.54	0	1.50176e+07	0	0	6.14853e+07	0	72178476	0	80554904	0	0	0		45.9			46.38		33.15		33.73					0.000188924			9.66606e-05		0.00355867		0.00311378					2			2		2		2
SPQMVSAIVR		Q9WU82	Catenin beta-1 OS=Rattus norvegicus GN=Ctnnb1 PE=1 SV=1 - [CTNB1_RAT]	1087.59	0	9.98625e+06	0	2.8226e+07	0	3.9651e+07	0	0	3.88907e+07	0	0	0		41.5		41.8		51.19			43.42					0.000428307		0.000383202		3.45948e-05			0.000263893					2		2		2			2
AMVNLQIQKDNPK		B0K020	CDGSH iron-sulfur domain-containing protein 1 OS=Rattus norvegicus GN=Cisd1 PE=3 SV=1 - [CISD1_RAT]	1498.8	0	1.06996e+07	191049635	140429177	1.03443e+08	4.41128e+07	122148018	2.96275e+07	1.5e+08	1.15971e+08	1.24239e+08	1.82554e+08		59.44	43.68	74.29	68.79	53.89	46.2	75.3	82.46	44.74	59.31	71.79		5.23309e-06	0.000182133	1.69438e-07	6.0119e-07	1.81702e-05	0.000104349	1.35756e-07	2.52557e-08	0.000149403	5.33349e-06	2.94686e-07		2	2	2	2	2	2	2	2
HNEETGDNVGPLIIK		B0K020	CDGSH iron-sulfur domain-containing protein 1 OS=Rattus norvegicus GN=Cisd1 PE=3 SV=1 - [CISD1_RAT]	1635.83	0	0	35946946	0	0	0	0	0	6.17559e+07	0	0	17931563			56.53						67.85			38.85			1.28952e-05						9.02324e-07			0.000684163			2						2
VVHAFDMEDLGDKAVYCR	C17(Methylthio)	B0K020	CDGSH iron-sulfur domain-containing protein 1 OS=Rattus norvegicus GN=Cisd1 PE=3 SV=1 - [CISD1_RAT]	2113.95	0	0	9.80821e+07	3.78697e+07	0	28336610	0	2.91535e+08	46320119	3.18252e+07	202814437	3.17532e+08			52.61	45.47		59.79		71.11	60.03	83.25	60.41	62.06			2.00121e-05	9.64892e-05		4.09322e-06		2.98168e-07	3.87315e-06	1.60871e-08	3.50317e-06	2.11582e-06			2	2		2		2	2
GKPLPEPVLWTK		Q1WIM2	Cell adhesion molecule 2 OS=Rattus norvegicus GN=Cadm2 PE=1 SV=2 - [CADM2_RAT]	1364.79	0	0	0	1.44755e+08	0	0	0	0	6.97313e+07	0	5.91801e+07	8.77867e+07				41.56					30.38		37.82	32.87				0.000129173					0.00169501		0.000289093	0.00095537				2					2
IIPSTPFPQEGQALTLTCESK	C18(Methylthio)	Q1WIM2	Cell adhesion molecule 2 OS=Rattus norvegicus GN=Cadm2 PE=1 SV=2 - [CADM2_RAT]	2306.14	0	0	1.32646e+08	6.39516e+07	54182519	4.53355e+07	35851022	4.5269e+07	6.14453e+07	5.70346e+07	0	65000551			56.49	61.54	34.5	50.87	32.83	57.35	46.51	51.47		40.02			1.95218e-05	5.78701e-06	0.00287399	6.71141e-05	0.00432592	1.50943e-05	0.000183153	5.88104e-05		0.000831164			2	2	2	2	2	2	2
ATPAADGKAPLTKPVK		Q5FVI4	Cell cycle exit and neuronal differentiation protein 1 OS=Rattus norvegicus GN=Cend1 PE=1 SV=1 - [CEND_RAT]	1564.91	0	0	0	0	0	0	112736313	0	155039645	0	0	5.21115e+06					41.51	33.01	44.87		48.27			32.94					0.000109479	0.000750052	5.21339e-05		2.23404e-05			0.000813055					3	3	2		2
ATPAADGKAPLTKPVKK		Q5FVI4	Cell cycle exit and neuronal differentiation protein 1 OS=Rattus norvegicus GN=Cend1 PE=1 SV=1 - [CEND_RAT]	1693	0	4.60188e+07	1.34968e+09	0	5.69181e+08	6.31464e+08	950233142	0	1.45178e+09	3.97281e+08	0	4.59613e+08		36.02	45.18	38.47	39.51	40.14	41.6		46.52	32.46	63.74	42.91		0.000249442	3.03389e-05	0.000141896	0.000111679	9.68278e-05	6.91831e-05		2.22316e-05	0.000567545	4.22669e-07	5.11682e-05		3	3	2	3	3	3		3
DAQAEKQEQPAAPGPATTK		Q5FVI4	Cell cycle exit and neuronal differentiation protein 1 OS=Rattus norvegicus GN=Cend1 PE=1 SV=1 - [CEND_RAT]	1937.96	0	0	0	7.20153e+07	3.17604e+07	1.90483e+08	1.12308e+08	0	0	0	4.03953e+07	1.02866e+08		60.44	60.77	54.66	50.29	48.15	67.95		60.6	58.49	61.6	52.67		6.09963e-06	5.73708e-06	2.22287e-05	6.31399e-05	0.000104879	1.09822e-06		5.66126e-06	9.27345e-06	4.63527e-06	3.67713e-05		3	3	2	2	2	2		3
GKSASSPKPDTKVPQATAEAK		Q5FVI4	Cell cycle exit and neuronal differentiation protein 1 OS=Rattus norvegicus GN=Cend1 PE=1 SV=1 - [CEND_RAT]	2098.11	0	15466344	1.82878e+08	425039201	0	0	0	0	0	1.5607e+08	1.07592e+08	1.45531e+08	31.56	31.59	62.43	44.39						61.44	31.53	57.51	0.00314205	0.0032591	2.68595e-06	0.00016922						3.37363e-06	0.00330444	8.33869e-06	4	3	3	3
KDAQAEKQEQPAAPGPATTK		Q5FVI4	Cell cycle exit and neuronal differentiation protein 1 OS=Rattus norvegicus GN=Cend1 PE=1 SV=1 - [CEND_RAT]	2066.05	0	8.15602e+06	0	0	0	0	4.51252e+07	0	80443422	2.02541e+07	1.24042e+07	0		87.17					66.62		32.88	74.6	48.66			1.42941e-08					1.62239e-06		0.00383845	2.58319e-07	0.000102789			3					3		3
QEQPAAPGPATTK		Q5FVI4	Cell cycle exit and neuronal differentiation protein 1 OS=Rattus norvegicus GN=Cend1 PE=1 SV=1 - [CEND_RAT]	1295.66	0	1.07908e+07	22670046	38137151	4.17315e+07	124692521	107178097	0	110858592	4.98994e+07	29723670	2.54779e+07		55.78	42.59	51.71	50.61	50.86	39.18		59.23	52.43	49.52	45.93		1.00412e-05	0.000278158	2.56321e-05	3.86687e-05	3.15835e-05	0.000489165		5.25355e-06	2.54308e-05	4.24408e-05	9.8279e-05		2	2	2	2	2	2		2
SASSPKPDTKVPQATAEAK		Q5FVI4	Cell cycle exit and neuronal differentiation protein 1 OS=Rattus norvegicus GN=Cend1 PE=1 SV=1 - [CEND_RAT]	1913	0	0	39518211	0	399625125	3.07322e+08	4.72024e+07	0	0	2.57941e+08	0	2.63212e+07		49.01	48.88	58.09	71.52	51.62	35.9	52.15	54.95	44.99	50.58	53.14		9.35742e-05	9.64176e-05	1.17205e-05	5.24996e-07	5.13046e-05	0.00173502	4.54105e-05	2.22323e-05	0.000239302	6.38738e-05	3.66393e-05		3	2	2	2	2	2	3	3
IREAVISR		Q01062	cGMP-dependent 3',5'-cyclic phosphodiesterase OS=Rattus norvegicus GN=Pde2a PE=1 SV=2 - [PDE2A_RAT]	943.568	0	0	0	0	2.84075e+07	0	0	0	0	2.03881e+07	0	1.49652e+07					37.23					36.02		40.61					0.000671782					0.000887623		0.000317171					2
LSCDGLGPSDLLGKPLAR	C3(Methylthio)	Q01062	cGMP-dependent 3',5'-cyclic phosphodiesterase OS=Rattus norvegicus GN=Pde2a PE=1 SV=2 - [PDE2A_RAT]	1857.96	0	0	9.73283e+07	119178269	78402010	0	2.94199e+07	0	0	0	0	0			88.12	104.64	86.48	62.44	88.01		62.52		62.77	62.69			1.03294e-08	2.31902e-10	1.59683e-08	3.87712e-06	1.15431e-08		3.63842e-06		3.56701e-06	3.63332e-06			2	2	2	3	2		3
ALGFPLERPK		Q8VHF5	Citrate synthase, mitochondrial OS=Rattus norvegicus GN=Cs PE=1 SV=1 - [CISY_RAT]	1127.66	6.21398e+07	0	351997169	0	5.47907e+07	253243424	5.3639e+08	0	599161061	6.33374e+07	0	0	44.54		50.86	32.42	35.4	48.65	48.63		45.26	45.11	36	32.35	0.000117773		1.84579e-05	0.00194751	0.000966151	4.23021e-05	4.661e-05		0.00010127	0.000100204	0.000778685	0.00136794	2		2	3	2	2	2		2
GLVYETSVLDPDEGIR		Q8VHF5	Citrate synthase, mitochondrial OS=Rattus norvegicus GN=Cs PE=1 SV=1 - [CISY_RAT]	1762.89	0	0	0	0	0	158463360	3.01462e+08	49836804	2.51194e+08	114605722	1.31146e+08	0			95.56			95.69	82.59	82.17	89.2	69.78	109.25				2.18207e-09			2.11773e-09	4.21368e-08	4.55052e-08	9.19732e-09	7.94231e-07	9.15147e-11				2			2	2	2	2
GLVYETSVLDPDEGIRFR		Q8VHF5	Citrate synthase, mitochondrial OS=Rattus norvegicus GN=Cs PE=1 SV=1 - [CISY_RAT]	2066.05	0	0	3.39748e+08	1.86241e+08	0	1.87057e+08	2.31722e+08	7.89529e+07	1.79879e+08	1.72428e+08	1.28135e+08	0			55.06	51.26		39.25	62.96	54.54	64.33	44.05	36.7				2.29238e-05	5.05014e-05		0.000796296	3.79368e-06	2.6367e-05	2.60129e-06	0.000295163	0.00147519				3	3		3	3	3	3
GYSIPECQK	C7(Methylthio)	Q8VHF5	Citrate synthase, mitochondrial OS=Rattus norvegicus GN=Cs PE=1 SV=1 - [CISY_RAT]	1070.46	0	0	5.00828e+08	0	0	6.10391e+08	0	0	0	3.78712e+08	0	0			32.08		41.76	30.04				30.15					0.000617974		6.65227e-05	0.000990832				0.000963762					2		2	2
HLPKDPMFK		Q8VHF5	Citrate synthase, mitochondrial OS=Rattus norvegicus GN=Cs PE=1 SV=1 - [CISY_RAT]	1112.59	7.35175e+06	0	0	0	0	0	0	0	413054421	0	1.31798e+08	1.10058e+08	33.15								35.46		30.72	31.34	0.00133147								0.000782227		0.0024146	0.00201991	3								3
HLPKDPMFKLVAQLYK		Q8VHF5	Citrate synthase, mitochondrial OS=Rattus norvegicus GN=Cs PE=1 SV=1 - [CISY_RAT]	1928.08	0	0	0	4.05501e+07	0	0	0	0	0	3.77958e+07	25264251	6.19242e+06				51.85						53.54	40.96	40.67				2.80846e-05						1.77035e-05	0.000344722	0.000385667				3
IVPNILLEQGK		Q8VHF5	Citrate synthase, mitochondrial OS=Rattus norvegicus GN=Cs PE=1 SV=1 - [CISY_RAT]	1223.74	0	0	3.50655e+08	398053507	177698434	252295295	7.83497e+08	0	7.51712e+08	0	358976091	224854170			57.23	59.85	51.95	57.19	55.8		55.92		60.01	61.37			1.88786e-06	1.03269e-06	6.36752e-06	1.90533e-06	2.62404e-06		2.55252e-06		9.95337e-07	8.38876e-07			2	2	2	2	2		2
IVPNILLEQGKAK		Q8VHF5	Citrate synthase, mitochondrial OS=Rattus norvegicus GN=Cs PE=1 SV=1 - [CISY_RAT]	1422.87	0	0	0	63230512	0	3.75787e+07	5.49724e+07	0	87426644	2.23318e+07	0	0				66.98		66.14	67.54		67.51	60.84						1.99972e-07		2.42644e-07	1.7578e-07		1.76999e-07	8.22186e-07						2		2	2		2
LVAQLYK		Q8VHF5	Citrate synthase, mitochondrial OS=Rattus norvegicus GN=Cs PE=1 SV=1 - [CISY_RAT]	834.509	0	0	114344052	0	4.77995e+07	2.92873e+07	2.40894e+08	0	201136274	0	0	0			47.01		41.55	42.6	47.19		46.91						3.38414e-05		0.000136469	0.00010716	3.72421e-05		3.97223e-05						2		2	2	2		2
RAALPSHVVTMLDNFPTNLHPMSQLSAAITALNSESNFAR		Q8VHF5	Citrate synthase, mitochondrial OS=Rattus norvegicus GN=Cs PE=1 SV=1 - [CISY_RAT]	4322.17	0	0	0	0	1.4368e+08	1.39396e+08	0	1.87359e+08	0	0	2.7705e+08	0			44.61		39.06	33.7		33.61		40.23	33.41	46.12			0.000326913		0.0011237	0.00394586		0.00402848		0.000867803	0.0037623	0.000232126			5		4	4		4
SMSTDGLMK	M8(Oxidation)	Q8VHF5	Citrate synthase, mitochondrial OS=Rattus norvegicus GN=Cs PE=1 SV=1 - [CISY_RAT]	985.433	0	0	0	0	9.49821e+07	138508109	0	0	0	0	0	4.25506e+07					36.03	34.98						31.11					0.000286878	0.000365341						0.000890631					2	2
SMSTDGLMK		Q8VHF5	Citrate synthase, mitochondrial OS=Rattus norvegicus GN=Cs PE=1 SV=1 - [CISY_RAT]	969.437	0	1.90978e+08	666852802	602746421	3.10293e+08	548965039	6.54653e+08	0	6.32396e+08	3.79513e+08	3.1631e+08	3.83521e+08		33.42	33.9	36.63	35.48	37.11	37.82		32.93	31.34	40.57	39.34		0.000887227	0.000794392	0.000423677	0.000552121	0.000379345	0.000322133		0.000789463	0.00139558	0.000171015	0.000227005		2	2	2	2	2	2		2
SMSTDGLMKFVDSK	M8(Oxidation)	Q8VHF5	Citrate synthase, mitochondrial OS=Rattus norvegicus GN=Cs PE=1 SV=1 - [CISY_RAT]	1561.72	0	0	0	0	0	0	3.62869e+07	0	5.30288e+07	5.115e+07	45343476	5.99506e+07							44.43		33.46	63.17	52.79	63.08							0.000102765		0.00139753	1.37355e-06	1.65695e-05	1.52532e-06							2		2
TVVGQITVDMMYGGMR		Q8VHF5	Citrate synthase, mitochondrial OS=Rattus norvegicus GN=Cs PE=1 SV=1 - [CISY_RAT]	1757.83	24818201	0	141950326	2.12609e+08	129229761	1.23528e+08	2.33211e+08	343560209	1.9475e+08	0	1.50133e+08	2.17183e+08	61.88		103.13	76.7	103.08	89.34	89.47	85.27	94.57		103	103.07	3.24317e-06		2.21315e-10	1.12243e-07	2.55861e-10	5.41319e-09	5.81845e-09	1.56012e-08	1.72824e-09		2.63123e-10	2.53985e-10	2		2	2	2	2	2	2	2
VVPGYGHAVLR		Q8VHF5	Citrate synthase, mitochondrial OS=Rattus norvegicus GN=Cs PE=1 SV=1 - [CISY_RAT]	1167.66	1.24199e+08	1.31377e+07	1.55861e+09	1.25913e+09	0	0	1257790934	3.21334e+07	1.56205e+09	0	0	7.3919e+08	53.79	82.69	72.52	72.35	58.03	54.59	72.46	70.61	74.38	61.8	63.85	72.5	8.35661e-06	1.07654e-08	9.236e-08	9.6047e-08	3.06927e-06	6.95072e-06	1.13509e-07	1.73792e-07	7.1127e-08	1.32139e-06	8.24195e-07	1.12468e-07	2	2	2	2	3	3	2	2	2
VVPGYGHAVLRK		Q8VHF5	Citrate synthase, mitochondrial OS=Rattus norvegicus GN=Cs PE=1 SV=1 - [CISY_RAT]	1295.76	0	0	210524923	156143612	132713502	0	0	2.00725e+06	0	0	1.85825e+08	0			44.86	42.43	37.28	40.07	40.07	31.13	46.73		36.75				3.91905e-05	6.85774e-05	0.000224482	0.000118081	0.000118081	0.000925084	3.18487e-05		0.000253619				2	2	2	3	3	2	3
ATTHEVMGPK		Q05140	Clathrin coat assembly protein AP180 OS=Rattus norvegicus GN=Snap91 PE=1 SV=1 - [AP180_RAT]	1070.53	0	0	0	3.19185e+07	0	3.40716e+07	0	0	0	3.78808e+07	3.61941e+07	3.09289e+07				48.53		54.44				45.64	56.77	49.71				4.06816e-05		1.04327e-05				7.91404e-05	6.10096e-06	3.10026e-05				2		2
IAAAQYSVTGSAVAR		Q05140	Clathrin coat assembly protein AP180 OS=Rattus norvegicus GN=Snap91 PE=1 SV=1 - [AP180_RAT]	1464.78	4.19919e+07	9.39382e+06	73609996	0	0	0	0	71861300	0	0	0	0	46.14	91.51	50.28					96.16					0.00011553	3.53159e-09	4.78157e-05					1.1742e-09					2	2	2					2
KGDLQWNAGEK		Q05140	Clathrin coat assembly protein AP180 OS=Rattus norvegicus GN=Snap91 PE=1 SV=1 - [AP180_RAT]	1245.62	0	0	0	4.26133e+07	4.07624e+07	3.5983e+07	0	0	0	0	0	0				42.21	48.8	45.74										0.000249487	5.47077e-05	0.000110675										2	2	2
KPPAKDPLADLNIKDFL		Q05140	Clathrin coat assembly protein AP180 OS=Rattus norvegicus GN=Snap91 PE=1 SV=1 - [AP180_RAT]	1895.06	0	0	595925276	4.49743e+08	4.2053e+08	3.09511e+08	0	0	4.78797e+08	2.79138e+08	363431496	234713292			39.26	42.66	47.32	40.21	31.59		43.7	43.98	36.25	45.43			0.000231225	0.0001355	3.70706e-05	0.000190559	0.00194159		0.000110911	9.99862e-05	0.000592843	5.72836e-05			3	3	3	3	2		3
QMAFDFAR		Q05140	Clathrin coat assembly protein AP180 OS=Rattus norvegicus GN=Snap91 PE=1 SV=1 - [AP180_RAT]	985.456	0	0	0	0	0	2.41545e+07	3.75704e+07	0	0	1.80437e+07	1.97324e+07	1.76117e+07						40.28	35.72			34.44	37.23	37.22						0.000131259	0.000495646			0.000629561	0.00027439	0.000350891						2	2
ALEHFTDLYDIKR		P11442	Clathrin heavy chain 1 OS=Rattus norvegicus GN=Cltc PE=1 SV=3 - [CLH_RAT]	1620.84	0	0	8.8127e+07	58019236	0	3.68073e+07	67030520	2.49158e+07	8.3429e+07	0	5.19742e+07	52936834			71.5	53.52		62.65	62.79	68.51	62.85		62.63	62.83			4.67244e-07	3.09019e-05		3.72126e-06	3.47171e-06	1.0006e-06	3.99476e-06		3.73844e-06	3.59624e-06			3	3		3	3	3	3
CNEPAVWSQLAK	C1(Methylthio)	P11442	Clathrin heavy chain 1 OS=Rattus norvegicus GN=Cltc PE=1 SV=3 - [CLH_RAT]	1391.64	3.00479e+07	0	6.89902e+08	607161528	482811869	4.30856e+08	7.3347e+08	0	7.33038e+08	3.49962e+08	2.091e+08	2.55014e+08	41.74		48.6	46.3	46.46	41.82	38.29		44	39.06	46.91	49.14	0.000200965		3.72704e-05	6.21221e-05	7.11722e-05	0.000184144	0.000444755		0.000109479	0.000347663	5.50001e-05	3.29127e-05	2		2	2	2	2	2		2
ESYVETELIFALAK		P11442	Clathrin heavy chain 1 OS=Rattus norvegicus GN=Cltc PE=1 SV=3 - [CLH_RAT]	1612.85	0	0	0	2.87994e+07	1.88639e+07	0	3.95811e+07	30097544	4.22648e+07	0	2.56416e+07	0				47.27	33.48		60.05	39.9	34.37		39.51					0.0001125	0.00269247		5.93132e-06	0.000613976	0.00206561		0.000671663					2	2		2	2	2
FLRENPYYDSR		P11442	Clathrin heavy chain 1 OS=Rattus norvegicus GN=Cltc PE=1 SV=3 - [CLH_RAT]	1459.7	7.80527e+07	0	0	4.20663e+08	0	1.42958e+08	281675172	0	0	2.74411e+08	0	2.11293e+08	50.17			42.79	33.25	42.65	43.49			33.22	35.4	37.18	3.60605e-05			0.000207777	0.00182163	0.000203719	0.00018804			0.0018819	0.00113919	0.000727417	2			2	3	2	2
GILRTPDTIR		P11442	Clathrin heavy chain 1 OS=Rattus norvegicus GN=Cltc PE=1 SV=3 - [CLH_RAT]	1141.67	0	0	0	0	0	38986378	0	0	0	6.18309e+07	3.96734e+07	0						32.08				32.86	30.15							0.00111499				0.00103521	0.0019321							3
GMVKEAIDSYIK		P11442	Clathrin heavy chain 1 OS=Rattus norvegicus GN=Cltc PE=1 SV=3 - [CLH_RAT]	1353.71	0	0	0	45047230	0	0	0	0	0	3.54069e+07	5.68876e+07	0				56.4						47.75	56.41					1.00798e-05						7.80644e-05	8.571e-06					2
IHEGCEEPATHNALAK	C5(Methylthio)	P11442	Clathrin heavy chain 1 OS=Rattus norvegicus GN=Cltc PE=1 SV=3 - [CLH_RAT]	1765.8	1.45809e+08	0	1.6832e+09	0	1.37814e+09	0	0	0	1.71288e+09	7.14495e+08	7.85034e+08	8.29478e+08	42.99		37.85	31.54	33.56				43.44	41.05	37.83	46.85	0.000148191		0.000475771	0.00199915	0.00127761				0.000129076	0.000235571	0.000494449	6.19614e-05	3		3	2	3				3
IHEGCEEPATHNALAK	C5(Methylthio); N12(Deamidated)	P11442	Clathrin heavy chain 1 OS=Rattus norvegicus GN=Cltc PE=1 SV=3 - [CLH_RAT]	1766.78	0	0	3.65187e+07	1.01161e+08	0	60281356	8.1223e+07	0	5.33071e+07	6.25085e+07	6.16344e+07	8.14412e+07			32.56	44.78		40.66	41.59		30.23	53.16	38.85	53.32			0.00105379	6.98585e-05		0.000180393	0.000128284		0.001802	9.17812e-06	0.000247602	8.84614e-06			3	3		3	3		3
IYIDSNNNPER	N6(Deamidated)	P11442	Clathrin heavy chain 1 OS=Rattus norvegicus GN=Cltc PE=1 SV=3 - [CLH_RAT]	1335.62	0	0	72916829	7.00488e+07	60629548	9.71015e+07	8.17983e+07	0	0	5.30572e+07	51940453	6.01212e+07			67.66	73.35	79.82	52.43	74.14			73.09	60.59	70.4			5.65606e-07	1.41026e-07	3.54388e-08	1.74301e-05	1.17571e-07			1.49727e-07	2.66256e-06	2.78163e-07			2	2	2	2	2
IYIDSNNNPER		P11442	Clathrin heavy chain 1 OS=Rattus norvegicus GN=Cltc PE=1 SV=3 - [CLH_RAT]	1334.63	0	142277008	490962564	334903312	4.87779e+08	6.0731e+08	5.71076e+08	2.21124e+07	618714103	4.12979e+08	3.62146e+08	333838301		75.78	83.02	71.12	73.77	73.7	72.76	65.41	69.52	80.43	71.25	70.72		9.51267e-08	1.79598e-08	2.78165e-07	1.51113e-07	1.53569e-07	1.90679e-07	1.03586e-06	4.02071e-07	3.26064e-08	3.26204e-07	3.68544e-07		2	2	2	2	2	2	2	2
KFNALFAQGNYSEAAK		P11442	Clathrin heavy chain 1 OS=Rattus norvegicus GN=Cltc PE=1 SV=3 - [CLH_RAT]	1758.87	0	0	347223949	0	1.57055e+08	4.82803e+07	2.73901e+08	2.53424e+08	2.26902e+08	0	2.03692e+08	212700620			43.66	65.28	79.6	69.47	86.17	72.24	63.66	49.52	83.1	95.72			0.000264774	1.95679e-06	7.23676e-08	7.45665e-07	1.54589e-08	3.94043e-07	2.84148e-06	7.3713e-05	3.23254e-08	1.75486e-09			2	3	2	2	2	2	2
KGQVLSVCVEEENIIPYITNVLQNPDLALR	C8(Methylthio)	P11442	Clathrin heavy chain 1 OS=Rattus norvegicus GN=Cltc PE=1 SV=3 - [CLH_RAT]	3413.78	0	0	0	20057245	0	0	0	38098413	3.71159e+07	0	3.1193e+07	2.48138e+07				55.55				45.66	57.74		58.4	55.17				1.81098e-05				0.000188793	1.08532e-05		9.32309e-06	1.91576e-05				3				3	3
LASTLVHLGEYQAAVDGAR		P11442	Clathrin heavy chain 1 OS=Rattus norvegicus GN=Cltc PE=1 SV=3 - [CLH_RAT]	1971.03	0	0	5.9906e+08	4.22312e+08	3.26462e+08	3.05052e+08	492019673	5.0196e+08	0	1.85289e+08	409754974	0			93.97	81.11	83.93	79.17	91.4	67.39	87.14	69.89	83.51				2.42524e-09	4.14337e-08	2.12402e-08	6.53723e-08	3.80329e-09	9.66665e-07	1.2268e-08	5.79493e-07	2.36198e-08				3	3	3	3	3	3	2
LKLLLPWLEAR		P11442	Clathrin heavy chain 1 OS=Rattus norvegicus GN=Cltc PE=1 SV=3 - [CLH_RAT]	1351.85	0	0	4.55671e+08	3.18907e+08	2.28025e+08	1.33288e+08	2.60847e+08	0	3.11722e+08	1.90365e+08	2.76365e+08	2.18e+08			52.99	47.67	51.19	46.28	50		51.19	53.33	50.6	51.23			5.01153e-06	1.70596e-05	7.58525e-06	2.34947e-05	9.97631e-06		7.58525e-06	4.63415e-06	8.689e-06	7.51571e-06			2	2	2	2	2		2
LLEMNLMHAPQVADAILGNQMFTHYDR	M4(Oxidation)	P11442	Clathrin heavy chain 1 OS=Rattus norvegicus GN=Cltc PE=1 SV=3 - [CLH_RAT]	3144.51	0	0	0	2.8016e+07	0	0	5.46917e+06	0	4.34721e+06	0	0	0				43.37			47.6		50.45							0.000370507			0.000129466		6.98718e-05							3			3		3
LLEMNLMHAPQVADAILGNQMFTHYDR		P11442	Clathrin heavy chain 1 OS=Rattus norvegicus GN=Cltc PE=1 SV=3 - [CLH_RAT]	3128.51	0	0	0	7.75073e+07	0	2.0152e+07	0	0	75500856	0	9.50027e+07	8.46911e+07				68.48		59.07			60.78		64.62	69.72				1.18491e-06		9.91037e-06			7.06085e-06		2.95098e-06	8.5861e-07				3		3			3
LLLPWLEAR		P11442	Clathrin heavy chain 1 OS=Rattus norvegicus GN=Cltc PE=1 SV=3 - [CLH_RAT]	1110.66	0	0	7.4886e+08	5.18098e+08	3.09464e+08	3.49372e+08	6.06862e+08	8999579	696260363	3.06373e+08	433369521	3.68987e+08			61.71	62.2	62.03	62.09	59.84	59.98	61.74	62.12	62.22	61.92			6.7293e-07	6.01132e-07	8.14598e-07	8.03421e-07	1.34879e-06	1.306e-06	8.7085e-07	7.97891e-07	5.9837e-07	6.41165e-07			2	2	2	2	2	2	2
LLYNNVSNFGR	N4(Deamidated)	P11442	Clathrin heavy chain 1 OS=Rattus norvegicus GN=Cltc PE=1 SV=3 - [CLH_RAT]	1297.65	0	0	29526620	7.33025e+07	0	4.36842e+07	52189267	0	9.46752e+07	0	7.20425e+07	5.64349e+07			54.22	67.09		62.24	80.79		74.16		60.62	67.21			1.457e-05	7.52421e-07		2.26873e-06	3.16799e-08		1.51564e-07		3.4245e-06	7.41421e-07			2	2		2	2		2
LLYNNVSNFGR		P11442	Clathrin heavy chain 1 OS=Rattus norvegicus GN=Cltc PE=1 SV=3 - [CLH_RAT]	1296.67	7.52677e+07	1.14107e+07	500153622	2.72308e+08	0	2.52016e+08	0	0	4.05373e+08	265638986	4.01503e+08	2.71505e+08	53.21	67.66	69.36	71.57		68.63			76.16	72.42	75.56	76.03	1.83849e-05	7.28432e-07	4.9248e-07	2.891e-07		5.82625e-07			1.02894e-07	2.20526e-07	1.04239e-07	9.35473e-08	2	2	2	2		2			2
MAVRNNLAGAEELFAR	N5(Deamidated)	P11442	Clathrin heavy chain 1 OS=Rattus norvegicus GN=Cltc PE=1 SV=3 - [CLH_RAT]	1762.89	9.84308e+06	0	18965876	0	0	0	1.07401e+07	0	0	0	0	0	71.83		68.88				66.65						4.82267e-07		9.70647e-07				1.56797e-06						3		3				3
NNLAGAEELFAR		P11442	Clathrin heavy chain 1 OS=Rattus norvegicus GN=Cltc PE=1 SV=3 - [CLH_RAT]	1304.66	1.1848e+07	0	4.79006e+08	4.16111e+08	0	4.07534e+08	4.97357e+08	3.95354e+07	0	303051900	0	0	39.89	46.11	72.34	71.13		57.56	69.47	83.41		79.44			0.000564109	0.000115106	2.77136e-07	3.5847e-07		8.15554e-06	5.31004e-07	2.12057e-08		5.40373e-08			2	2	2	2		2	2	2
QLPLVKPYLR		P11442	Clathrin heavy chain 1 OS=Rattus norvegicus GN=Cltc PE=1 SV=3 - [CLH_RAT]	1226.76	10559235	0	443456833	390319571	0	0	5.05482e+08	7.97652e+06	5.97257e+08	0	3.9743e+08	0	36.01		35.23	34.93			39.4	33.67	35.09	45.76	40.54	48.56	0.000488691		0.000584837	0.000498117			0.00022389	0.000837596	0.00058851	5.44194e-05	0.000172201	2.71666e-05	3		3	3			3	3	3
SVDPTLALSVYLR		P11442	Clathrin heavy chain 1 OS=Rattus norvegicus GN=Cltc PE=1 SV=3 - [CLH_RAT]	1433.8	2.81518e+07	0	0	110143638	0	0	1.31923e+08	17288161	1.07229e+08	6.72408e+07	82871174	4.94083e+07	55.7			84.63			76.88	87.59	86.31	69.43	69.13	91.1	8.0746e-06			1.41183e-08			6.15349e-08	6.00923e-09	9.70617e-09	3.42075e-07	5.07047e-07	2.32874e-09	2			2			2	2	2
SVNESLNNLFITEEDYQALR		P11442	Clathrin heavy chain 1 OS=Rattus norvegicus GN=Cltc PE=1 SV=3 - [CLH_RAT]	2355.15	0	0	70795740	6.51869e+07	3.71925e+07	6.82701e+07	1.6298e+08	71030038	1.24663e+08	53932452	1.00445e+08	4.52088e+07	56.73		68.99	68.74	69.2	80.9	92.75	80.88	80.51	48.33	69.32	34.6	1.65613e-05		9.96844e-07	1.00245e-06	9.43778e-07	6.42136e-08	4.19399e-09	6.451e-08	6.98023e-08	0.000114576	9.06362e-07	0.00265254	2		2	2	2	2	2	2	2
VKQLPLVKPYLR		P11442	Clathrin heavy chain 1 OS=Rattus norvegicus GN=Cltc PE=1 SV=3 - [CLH_RAT]	1453.92	1.22126e+08	0	0	0	0	0	0	3.0047e+07	0	0	0	6.67305e+08	45.84							47.68				60.12	2.59998e-05							1.70204e-05				9.70443e-07	3							3
WLKEDKLECSEELGDLVK	C9(Methylthio)	P11442	Clathrin heavy chain 1 OS=Rattus norvegicus GN=Cltc PE=1 SV=3 - [CLH_RAT]	2180.06	0	0	0	0	0	4.14193e+07	1.038e+08	104642823	0	3.20793e+07	6.65687e+07	0						68.61	63.79	60.44		60.35	74.6							1.06045e-06	3.07105e-06	6.9581e-06		7.05767e-06	2.6352e-07							3	3	3
YCEKRDPHLACVAYER	C2(Methylthio); C11(Methylthio)	P11442	Clathrin heavy chain 1 OS=Rattus norvegicus GN=Cltc PE=1 SV=3 - [CLH_RAT]	2044.89	0	0	60728426	67860312	0	0	0	0	0	0	6.9005e+07	0			54.78	32.52							32.53				8.48282e-06	0.00123147							0.00147995				3	3
AVKELEEWYAR		P08081	Clathrin light chain A OS=Rattus norvegicus GN=Clta PE=1 SV=1 - [CLCA_RAT]	1393.71	0	0	181662430	1.02763e+08	1.11973e+08	6.62707e+07	0	7.41173e+07	1.41989e+08	0	1.03891e+08	173483250			63.41	63.35	64.69	59.69	64.6	58.7	56.19		65.22	67.83			2.66782e-06	2.28879e-06	1.86794e-06	4.94035e-06	1.76836e-06	6.87971e-06	1.33442e-05		1.80365e-06	8.65285e-07			2	2	2	2	3	2	2
LCDFNPK	C2(Methylthio)	P08081	Clathrin light chain A OS=Rattus norvegicus GN=Clta PE=1 SV=1 - [CLCA_RAT]	882.386	0	3.03518e+07	0	0	2.67758e+08	1.82253e+08	353366957	1.0073e+07	156713910	216857090	0	2.00834e+08		50.61			44.16	34.26	40.29	53.52	50.7	50.49	53.13	50.16		1.21654e-05			5.3719e-05	0.000431219	0.000130957	6.22484e-06	1.19159e-05	1.33996e-05	6.8097e-06	1.34936e-05		2			2	2	2	2	2
LEALDANSR		P08081	Clathrin light chain A OS=Rattus norvegicus GN=Clta PE=1 SV=1 - [CLCA_RAT]	988.506	0	7.08014e+06	0	0	0	2.54734e+07	45839312	0	46198161	25608345	0	2.38521e+07		56.67				65.58	63.5		58.79	52.65		59.21		1.11945e-05				1.42497e-06	2.32275e-06		6.80467e-06	2.8249e-05		6.17742e-06		2				2	2		2
LQSEPESIRK		P08081	Clathrin light chain A OS=Rattus norvegicus GN=Clta PE=1 SV=1 - [CLCA_RAT]	1186.64	0	4.85249e+06	0	0	0	0	0	0	0	0	1.64549e+07	1.3879e+07		32.04	35.75			36.6					34.06	50.88		0.00231314	0.00101108			0.000831349					0.00149205	3.10301e-05		2	3			3
SVLISLK		P08081	Clathrin light chain A OS=Rattus norvegicus GN=Clta PE=1 SV=1 - [CLCA_RAT]	759.502	0	1.5832e+07	142011293	0	0	9.07402e+07	1.27174e+08	0	8.65462e+07	112048168	0	1.11545e+08		40.05	41.29			34.29	34.4		34.1	51.46	40.78	41.27		9.86211e-05	7.41259e-05			0.00037151	0.000362218		0.000388124	7.12804e-06	8.33624e-05	7.44681e-05		2	2			2	2		2
AKKDLEEWNQR		P08082	Clathrin light chain B OS=Rattus norvegicus GN=Cltb PE=1 SV=1 - [CLCB_RAT]	1416.72	0	0	6.0792e+07	3.62049e+07	5.74821e+07	3.24515e+07	0	0	3.44967e+07	6.08846e+07	0	0			66.31	61.69	47.92	54.33	31.12	43.01	62.06	59.38		59.47			9.82312e-07	3.93032e-06	9.36328e-05	2.19542e-05	0.00332253	0.00029502	3.82715e-06	5.01752e-06		4.91461e-06			2	2	2	2	3	3	2
LQELDAASKVTEQEWR		P08082	Clathrin light chain B OS=Rattus norvegicus GN=Cltb PE=1 SV=1 - [CLCB_RAT]	1902.95	0	0	0	3.57915e+07	0	4.86422e+07	60542353	1.1851e+08	4.6002e+07	43479808	0	6.28623e+07				105.95		92.21	90.16	86.82	80.64	100.24		99.19				2.17253e-10		4.83945e-09	8.24074e-09	1.67416e-08	7.16272e-08	7.61721e-10		9.82104e-10				2		2	2	2	2
LQELDAASKVTEQEWREK		P08082	Clathrin light chain B OS=Rattus norvegicus GN=Cltb PE=1 SV=1 - [CLCB_RAT]	2160.09	0	0	0	0	1.91217e+08	190920832	1.05165e+08	0	138696428	157096436	1.1737e+08	1.3367e+08					51.58	38.9	50.88	89.03	30.24	57.57	50.93	43.5					5.24743e-05	0.000953305	6.451e-05	9.62699e-09	0.00714409	1.33863e-05	6.8615e-05	0.000337246					3	3	3	2	3
LTQEPESIR		P08082	Clathrin light chain B OS=Rattus norvegicus GN=Cltb PE=1 SV=1 - [CLCB_RAT]	1072.56	0	7.23642e+06	2.95428e+07	26858352	2.63001e+07	4.19854e+07	3.7196e+07	0	4.95928e+07	3.10096e+07	0	0		54.66	41.09	70.71	70.74	70.87	71.12		70.49	71.01				1.04304e-05	0.000237301	2.59e-07	2.69867e-07	2.49632e-07	2.35668e-07		2.67992e-07	2.41713e-07				2	2	2	2	2	2		2
LTQEPESIRK		P08082	Clathrin light chain B OS=Rattus norvegicus GN=Cltb PE=1 SV=1 - [CLCB_RAT]	1200.66	0	1.04985e+07	5.43288e+07	3.15128e+07	0	0	6.99734e+07	0	110250592	4.71659e+07	0	2.92926e+07		31.9	41.04	36.4			42.05		35.45	38.3		30.76		0.00245349	0.000299077	0.00087053			0.000237019		0.00108339	0.000562061		0.00318995		2	2	2			2		2
SVLMSLK		P08082	Clathrin light chain B OS=Rattus norvegicus GN=Cltb PE=1 SV=1 - [CLCB_RAT]	777.454	0	2.11894e+07	1.53553e+08	9.78722e+07	9.84982e+07	6.5319e+07	8.15003e+07	0	101397499	8.6448e+07	0	7.38826e+07		31.87	30.92	40.76	31.72	30.88	37.38		31.96	31.83	40.75	30.98		0.0015278	0.00190138	0.000197273	0.0015815	0.00289887	0.000511868		0.00149647	0.00232932	0.000197728	0.00187529		2	2	2	2	2	2		2
VAQLCDFNPK	C5(Methylthio)	P08082	Clathrin light chain B OS=Rattus norvegicus GN=Cltb PE=1 SV=1 - [CLCB_RAT]	1180.55	5.16296e+06	0	3.56635e+08	3.21745e+08	2.68371e+08	2.15568e+08	3.20668e+08	0	1.33027e+08	249883930	2.92858e+08	234986242	32.25	35.3	50.35	50.23	54.8	50.26	49.72		50.3	50.25	38.84	50.35	0.00145937	0.000723046	2.2603e-05	2.41847e-05	8.11271e-06	2.30763e-05	2.61316e-05		2.56645e-05	2.21854e-05	0.000333074	2.44481e-05	2	2	2	2	2	2	2		2
VTEQEWR		P08082	Clathrin light chain B OS=Rattus norvegicus GN=Cltb PE=1 SV=1 - [CLCB_RAT]	947.458	0	0	0	0	0	1.31747e+07	2.7368e+07	0	2.09839e+07	1.55123e+07	9.72977e+06	1.15083e+07						59.32	48.16		36.01	40.85	36.28	40.94						3.33307e-06	4.12443e-05		0.000676649	0.000234339	0.000635863	0.000213425						2	2		2
AVLFCLSEDKK	C5(Methylthio)	P45592	Cofilin-1 OS=Rattus norvegicus GN=Cfl1 PE=1 SV=3 - [COF1_RAT]	1298.65	0	0	136860982	8.634e+07	9.98011e+07	7.85125e+07	159569635	7.35081e+07	1.05576e+08	99728329	105953558	1.41182e+08			36.22	55.87	40.77	58.38	55.34	51.99	43.06	45.34	61.23	54.69			0.000859612	9.31757e-06	0.000280572	5.08239e-06	9.79591e-06	2.11858e-05	0.000177952	9.79591e-05	2.63674e-06	1.13774e-05			2	2	2	2	2	2	2
ESKKEDLVFIFWAPESAPLK		P45592	Cofilin-1 OS=Rattus norvegicus GN=Cfl1 PE=1 SV=3 - [COF1_RAT]	2334.24	0	0	1.3539e+08	9.69018e+07	141834312	3.74173e+07	0	2.49416e+08	153651736	0	125135928	0			43.16	53.75	44.23	37.69	42.08	39.28	45.27		42.17	45.85			0.000301912	2.80428e-05	0.000230319	0.00105534	0.000387151	0.000719996	0.000181272		0.000364042	0.00015731			3	3	3	3	2	3	3
KLTGIKHELQANCYEEVKDR	C13(Methylthio)	P45592	Cofilin-1 OS=Rattus norvegicus GN=Cfl1 PE=1 SV=3 - [COF1_RAT]	2420.21	0	0	103300980	0	1.03816e+08	0	0	1.21879e+08	0	2.20307e+07	3.73678e+07	3.77094e+07			76.53		38.21	66.86		80.58		81.11	81.73	93.94			1.76753e-07		0.00122316	1.66911e-06		7.26237e-08		6.35059e-08	5.43857e-08	3.28971e-09			3		3	3		3
MIYASSKDAIK	M1(Oxidation)	P45592	Cofilin-1 OS=Rattus norvegicus GN=Cfl1 PE=1 SV=3 - [COF1_RAT]	1242.64	0	9.45456e+06	0	0	0	0	0	0	0	1.27822e+07	1.03288e+07	0		38.86								39.33	35.56			0.000520068								0.000472558	0.00109799			2
MIYASSKDAIK		P45592	Cofilin-1 OS=Rattus norvegicus GN=Cfl1 PE=1 SV=3 - [COF1_RAT]	1226.64	0	1.90275e+07	0	9.93786e+07	0	1.33027e+08	0	2.48876e+07	0	0	0	1.09664e+08		34.94		32.48		38.32		38.81				38.46		0.00115426		0.00240098		0.000552117		0.000578699				0.000513219		2		2		2		2
MLPDKDCR	M1(Oxidation); C7(Methylthio)	P45592	Cofilin-1 OS=Rattus norvegicus GN=Cfl1 PE=1 SV=3 - [COF1_RAT]	1039.44	0	0	0	0	23225951	0	0	0	0	1.96121e+07	1.98434e+07	0					38.88					32.11	31.33						0.000239426					0.000984283	0.00117793						2
MLPDKDCR	C7(Methylthio)	P45592	Cofilin-1 OS=Rattus norvegicus GN=Cfl1 PE=1 SV=3 - [COF1_RAT]	1023.44	4.15362e+07	0	4.56837e+08	3.91875e+08	5.29259e+08	5.05069e+08	397286707	0	4.52579e+08	3.04857e+08	2.55752e+08	2.48724e+08	39.49		52.52	52.65	52.51	45.05	52.61		39.93	41.08	40.24	46.71	0.000191183		9.51588e-06	9.23526e-06	8.69624e-06	5.47064e-05	9.32071e-06		0.000157519	0.000132571	0.00016086	3.30622e-05	2		2	2	2	2	2		2
VFNDMK		P45592	Cofilin-1 OS=Rattus norvegicus GN=Cfl1 PE=1 SV=3 - [COF1_RAT]	753.36	0	2.65281e+07	0	0	0	0	141134847	0	80957415	0	0	0		42.39					35.74		32.48					0.000103818					0.000480035		0.00101689					2					2		2
VFNDMKVR		P45592	Cofilin-1 OS=Rattus norvegicus GN=Cfl1 PE=1 SV=3 - [COF1_RAT]	1008.53	0	0	8.19316e+07	0	0	8.0512e+07	0	0	0	3.12674e+07	0	0			39.95			40.22				39.66					0.000379342			0.000356477				0.000470424					2			2
YALYDATYETK		P45592	Cofilin-1 OS=Rattus norvegicus GN=Cfl1 PE=1 SV=3 - [COF1_RAT]	1337.63	0	3.62911e+07	0	0	0	0	0	1.2477e+08	1.37141e+08	0	0	0		39.27						31.77	44.65					0.000479132						0.00269436	0.000140535					2						2	2
KCEPIAMTVPR	C2(Methylthio)	Q91ZN1	Coronin-1A OS=Rattus norvegicus GN=Coro1a PE=1 SV=3 - [COR1A_RAT]	1290.64	0	0	1.26232e+08	1.02334e+08	7.14655e+07	5.61125e+07	9.3634e+07	0	1.05842e+08	6.16655e+07	0	0			62.95	72.99	60.9	54.48	51.17		52.44	47.31					2.9152e-06	2.88847e-07	3.25132e-06	2.04959e-05	4.31567e-05		3.27844e-05	0.000106824					2	2	2	2	2		2
KSDLFQEDLYPPTAGPDPALTAEEWLSGR		Q91ZN1	Coronin-1A OS=Rattus norvegicus GN=Coro1a PE=1 SV=3 - [COR1A_RAT]	3203.55	0	0	0	0	3.87876e+07	1.56623e+07	2.04165e+07	0	0	0	4.19504e+07	31211163					37.34	37.6	31.48				55.18	34.04					0.00179889	0.00162484	0.00657873				2.91254e-05	0.00374734					3	3	3
AGVHIKLPHLGKHEK		P07335	Creatine kinase B-type OS=Rattus norvegicus GN=Ckb PE=1 SV=2 - [KCRB_RAT]	1663.97	0	0	0	1.39221e+08	7.62666e+07	0	53027629	0	0	0	2.42078e+08	0				38.62	38.35		37.7				31.43					0.000158015	0.00016815		0.000195298				0.000717745					3	3		3
AIEKLAVEALSSLDGDLSGR		P07335	Creatine kinase B-type OS=Rattus norvegicus GN=Ckb PE=1 SV=2 - [KCRB_RAT]	2044.09	0	0	121802517	60362184	7.83138e+07	0	6.31213e+07	40533255	5.74513e+07	0	75799907	0			109.79	95.73	92.53		101.84	98.14	95.57	62.58	98.15	73.48			5.98239e-11	1.56371e-09	2.90405e-09		3.82962e-10	7.98001e-10	1.59466e-09	3.22965e-06	8.95686e-10	2.55785e-07			2	2	2		2	2	2
AIEKLAVEALSSLDGDLSGRYYALK		P07335	Creatine kinase B-type OS=Rattus norvegicus GN=Ckb PE=1 SV=2 - [KCRB_RAT]	2682.44	0	0	5.86931e+07	5.07922e+07	1.73588e+08	6.62692e+07	0	0	3.06215e+07	4.01715e+07	8.81701e+07	1.13138e+08			71.62	94.3	84.02	82.49			37.27	39.67	65.52	91.63			3.2711e-07	1.85768e-09	1.98139e-08	2.87455e-08			0.000993747	0.000577236	1.45883e-06	3.40099e-09			3	3	3	3			3
FPAEDEFPDLSSHNNHMAK		P07335	Creatine kinase B-type OS=Rattus norvegicus GN=Ckb PE=1 SV=2 - [KCRB_RAT]	2185.96	1.91824e+07	0	1.28913e+08	77378660	0	5.44051e+07	7.933e+07	0	1.19397e+08	5.21612e+07	100376937	7.35247e+07	34.16		64.88	68.87		53.77	61.87		60.41	70.25	80.2	40.63	0.00109357		1.25159e-06	3.43753e-07		1.70002e-05	1.85287e-06		2.54776e-06	2.69057e-07	2.53073e-08	0.000237866	3		3	3		3	3		3
FSEVLKR		P07335	Creatine kinase B-type OS=Rattus norvegicus GN=Ckb PE=1 SV=2 - [KCRB_RAT]	878.509	0	8.89426e+06	3.22292e+08	1.57272e+08	1.07228e+08	1.08924e+08	2.17054e+08	0	2.91622e+08	78042234	1.11435e+08	108973111		34.25	37.95	39.92	44.79	40.66	41.27		38.19	44.28	46.26	42.67		0.00127785	0.000545103	0.000346321	0.000112844	0.000292065	0.000253793		0.000515797	0.000128771	8.04413e-05	0.000183856		2	2	2	2	2	2		2
GFCLPPHCSR	C3(Methylthio); C8(Methylthio)	P07335	Creatine kinase B-type OS=Rattus norvegicus GN=Ckb PE=1 SV=2 - [KCRB_RAT]	1208.49	0	0	2.40173e+08	2.11388e+07	9.62686e+07	0	0	0	5.50276e+07	6.7084e+07	1.98384e+08	1.49008e+08			45.82	33.91	49.18	48.89			36.37	39.67	49.43	49.24			2.61198e-05	0.000405481	1.20495e-05	1.28816e-05			0.000230128	0.000107639	1.13755e-05	1.18842e-05			2	2	2	2			2
HGGYQPSDEHKTDLNPDNLQGGDDLDPNYVLSSR		P07335	Creatine kinase B-type OS=Rattus norvegicus GN=Ckb PE=1 SV=2 - [KCRB_RAT]	3753.7	0	0	2.7431e+08	0	75422504	0	3.47692e+08	2.75357e+07	3.43761e+08	213365244	0	278589036			30.58		37.72		39.08	43.46	31.36	41.81		35.83			0.00463741		0.00100581		0.00071685	0.000261474	0.00413094	0.000382321		0.00150199			4		4		4	4	4
LAVEALSSLDGDLSGR		P07335	Creatine kinase B-type OS=Rattus norvegicus GN=Ckb PE=1 SV=2 - [KCRB_RAT]	1602.84	52460673	0	352933387	2.46313e+08	1.12225e+08	1.92127e+08	2.82273e+08	9.09061e+07	3.13338e+08	2.18579e+08	200928968	1.8054e+08	67.18	62.1	54.39	75.49	56.15	74.21	88.83	79.79	56.7	88.64	72.2	82.62	1.08155e-06	3.57625e-06	2.16529e-05	1.65255e-07	1.4317e-05	2.20003e-07	7.46234e-09	6.1923e-08	1.2614e-05	7.93283e-09	3.58523e-07	2.87183e-08	2	2	2	2	2	2	2	2	2
LAVEALSSLDGDLSGRYYALK		P07335	Creatine kinase B-type OS=Rattus norvegicus GN=Ckb PE=1 SV=2 - [KCRB_RAT]	2241.18	0	0	94589229	58892407	9.15111e+07	0	0	6.33688e+07	42409381	9.12612e+07	0	0			45.43	44.02	60.12	53.75		65.31	66.95	48.55	40.64				0.000214813	0.000328911	7.87925e-06	3.60551e-05		2.20832e-06	1.70552e-06	0.000113804	0.0006084				3	3	3	2		3	3
LEQGQPIDDLMPAQK		P07335	Creatine kinase B-type OS=Rattus norvegicus GN=Ckb PE=1 SV=2 - [KCRB_RAT]	1682.85	0	0	5.4866e+07	0	0	8.99344e+07	0	0	1.88115e+08	2.81964e+07	0	0			37.65			41.69			33.26	32.1					0.00113382			0.000403197			0.00278517	0.00351459					2			2			2
LLIEMEQR		P07335	Creatine kinase B-type OS=Rattus norvegicus GN=Ckb PE=1 SV=2 - [KCRB_RAT]	1031.56	0	0	52184234	0	0	3.42465e+07	8.49091e+07	0	6.65106e+07	0	4.27089e+07	4.84422e+07			55.7			31.09	55.67		48.96		30.47	34.64			1.26502e-05			0.00354007	1.12473e-05		7.55992e-05		0.00372433	0.00170061			2			2	2		2
LLIEMEQRLEQGQPIDDLMPAQK		P07335	Creatine kinase B-type OS=Rattus norvegicus GN=Ckb PE=1 SV=2 - [KCRB_RAT]	2695.38	0	0	195032159	1.47161e+08	1.52021e+08	0	0	1.642e+08	0	1.04614e+08	1.3118e+08	0			32.33	77.95	51.07	31.14	49.03	37.19	30.45	37.09	42.47	43.62			0.00467832	1.30664e-07	6.40935e-05	0.00630687	0.000110023	0.00158518	0.00748304	0.00160256	0.000495459	0.000347608			3	3	3	2	2	3	2
LRFPAEDEFPDLSSHNNHMAK		P07335	Creatine kinase B-type OS=Rattus norvegicus GN=Ckb PE=1 SV=2 - [KCRB_RAT]	2455.15	4.88073e+07	0	1786847302	7.38036e+08	1.32296e+09	676906245	706525020	0	9.26942e+08	0	374246861	4.66152e+08	44.97		59.06	63.5	57.37	74.75	79.53		71.92	52.8	74.33	69.67	0.000186276		6.45659e-06	2.34509e-06	1.05358e-05	1.77532e-07	5.96148e-08		3.53478e-07	2.54532e-05	2.08472e-07	6.36579e-07	3		3	3	3	3	3		3
LRFPAEDEFPDLSSHNNHMAK	N16(Deamidated)	P07335	Creatine kinase B-type OS=Rattus norvegicus GN=Ckb PE=1 SV=2 - [KCRB_RAT]	2456.14	0	0	1.79497e+08	116248592	195049043	1.29864e+08	94427907	0	100353250	1.12525e+08	1.47174e+08	1.51674e+08	47.44		66.75	65.95	64.27	69.68	62.41		68.65	58.95	72.89	71.77	7.84313e-05		7.71423e-07	1.11803e-06	1.42162e-06	4.84409e-07	2.09553e-06		5.66302e-07	5.41239e-06	2.3903e-07	2.86067e-07	4		3	3	3	3	3		3
PFSNSHNTQK	N4(Deamidated)	P07335	Creatine kinase B-type OS=Rattus norvegicus GN=Ckb PE=1 SV=2 - [KCRB_RAT]	1160.53	0	0	0	7.88458e+06	0	0	0	0	0	1.336e+07	2.0436e+07	9.12478e+06		41.13		47.25		38.38				42.22	36.61	38.96		0.000165744		3.67312e-05		0.000304943				0.000116959	0.000425632	0.000247762		2		3		2
RAIEKLAVEALSSLDGDLSGR		P07335	Creatine kinase B-type OS=Rattus norvegicus GN=Ckb PE=1 SV=2 - [KCRB_RAT]	2200.19	0	0	5.88785e+07	0	4.80982e+07	0	0	0	0	0	0	2.88978e+07			71.78		58.37			37				57.02			2.75453e-07		6.04016e-06			0.000808081				8.3416e-06			3		3			4
RAIEKLAVEALSSLDGDLSGRYYALK		P07335	Creatine kinase B-type OS=Rattus norvegicus GN=Ckb PE=1 SV=2 - [KCRB_RAT]	2838.53	0	0	0	0	4.15889e+07	12285721	0	2.55659e+07	0	0	0	0			46.07		63.73	58.9		88.95							9.8869e-05		1.58866e-06	4.6377e-06		5.28504e-09							4		3	3		3
SMTEAEQQQLIDDHFLFDKPVSPLLLASGMAR	M30(Oxidation)	P07335	Creatine kinase B-type OS=Rattus norvegicus GN=Ckb PE=1 SV=2 - [KCRB_RAT]	3603.78	0	0	0	0	139950398	131978479	0	0	0	8.06058e+07	0	9.59353e+07					42.71	37.65				50.52		48.72					0.000509007	0.00161483				7.89569e-05		0.000120849					3	3
SMTEAEQQQLIDDHFLFDKPVSPLLLASGMAR		P07335	Creatine kinase B-type OS=Rattus norvegicus GN=Ckb PE=1 SV=2 - [KCRB_RAT]	3587.79	0	0	0	9.48306e+08	9.85295e+08	7.58462e+08	0	0	0	595314339	1.44141e+09	1.53535e+07			33.6	33.76	39.39	31.39				35.34	41.96	32.21			0.00371038	0.00347099	0.00094941	0.00602668				0.00241243	0.00052854	0.00477933			3	3	3	3
VLTPELYAELR		P07335	Creatine kinase B-type OS=Rattus norvegicus GN=Ckb PE=1 SV=2 - [KCRB_RAT]	1303.73	3.34857e+08	0	2.4984e+09	2.13355e+09	2.38025e+09	2.44885e+09	2634998860	103461753	2223687280	1.76523e+09	1871746055	1603302246	61.65	57.24	68.32	58.23	58.45	58.22	65.59	55.62	63.79	62.83	59.17	62.87	2.22271e-06	6.13597e-06	4.78502e-07	4.88521e-06	4.85824e-06	4.89647e-06	8.97188e-07	8.91012e-06	1.35795e-06	1.69388e-06	3.93444e-06	1.75582e-06	2	2	2	2	2	2	2	2	2
EVERVVVDALSGLKGDLAGR		P25809	Creatine kinase U-type, mitochondrial OS=Rattus norvegicus GN=Ckmt1 PE=1 SV=1 - [KCRU_RAT]	2083.15	0	0	101308856	0	1.12165e+08	6.9081e+07	0	6.09493e+07	0	5.16937e+07	6.02006e+07	0			55.94		36.03	51.75		59.22		41.41	32.75				8.40454e-06		0.000935473	2.70679e-05		4.48778e-06		0.00028188	0.00257479				3		3	3		3
GLSLPPACTR	C8(Methylthio)	P25809	Creatine kinase U-type, mitochondrial OS=Rattus norvegicus GN=Ckmt1 PE=1 SV=1 - [KCRU_RAT]	1060.53	2.67359e+07	0	2.44784e+08	173509384	156782500	1.82578e+08	2.36947e+08	0	2.47864e+08	1.30287e+08	1.56131e+08	1.19907e+08	49.31		60.28	57.45	57.2	58.55	60.92		55.7	66.67	60.95	56.1	6.32985e-05		4.07839e-06	7.73514e-06	8.57457e-06	6.28366e-06	3.43866e-06		1.11699e-05	9.68752e-07	3.25428e-06	1.10462e-05	2		2	2	2	2	2		2
HNNCMASHLTPAVYAR	C4(Methylthio)	P25809	Creatine kinase U-type, mitochondrial OS=Rattus norvegicus GN=Ckmt1 PE=1 SV=1 - [KCRU_RAT]	1830.82	0	0	4.55596e+08	3.22032e+07	0	1.55254e+08	24492623	0	0	0	2.44697e+07	2.2573e+07			75.99	49.62	71.88	81.87	61.21		63.86	62.28	74.96	59.99			7.55303e-08	3.1106e-05	1.81618e-07	1.78786e-08	2.15697e-06		1.17178e-06	1.53806e-06	8.45758e-08	2.85657e-06			2	2	3	2	2		3
ILENLR		P25809	Creatine kinase U-type, mitochondrial OS=Rattus norvegicus GN=Ckmt1 PE=1 SV=1 - [KCRU_RAT]	757.456	0	3.46817e+07	226052298	1.69846e+08	72370385	1.07433e+08	0	0	1.46601e+08	8.94024e+07	1.34889e+08	0		37.14	37.1	37.11	36.91	36.59			37.03	37.23	37.03			0.00060857	0.000614201	0.000612788	0.000641668	0.000690734			0.000624181	0.000596088	0.000624181			2	2	2	2	2			2
IPPPLVHGKH		P25809	Creatine kinase U-type, mitochondrial OS=Rattus norvegicus GN=Ckmt1 PE=1 SV=1 - [KCRU_RAT]	1094.65	1.09764e+07	0	150558242	6.56755e+07	9.37595e+07	1.1582e+08	142384693	0	2.59539e+08	56180631	2.0891e+08	3.99248e+07	36.39		46.49	36.57	39.02	36.23	39.8		39.3	41.83	39.59	39.61	0.000229071		2.23857e-05	0.000219771	0.000125017	0.000237668	0.000104465		0.000117211	6.54591e-05	0.00010964	0.000109136	2		2	2	2	2	2		2
KHNNCMASHLTPAVYAR	C5(Methylthio)	P25809	Creatine kinase U-type, mitochondrial OS=Rattus norvegicus GN=Ckmt1 PE=1 SV=1 - [KCRU_RAT]	1958.91	0	0	0	2.1178e+08	162560903	0	5.0698e+07	0	0	149817372	0	0				42.08	33.79		30.11			44.43	40.64	61.63				0.000297332	0.00183845		0.0043387			0.000167669	0.000375396	3.0231e-06				3	3		3
LCDKTTPTGWTLDQCIQTGVDNPGHPFIK	C2(Methylthio); C15(Methylthio)	P25809	Creatine kinase U-type, mitochondrial OS=Rattus norvegicus GN=Ckmt1 PE=1 SV=1 - [KCRU_RAT]	3277.52	0	0	0	0	4.21397e+08	0	0	2.51685e+08	3.61378e+08	3.81372e+08	479676669	4.87212e+08	33.47		49.1	53.33	54.17	49.83	61.99	59.23	60.92	44.97	50.47	60.25	0.00368819		9.71912e-05	3.50709e-05	2.87119e-05	7.95539e-05	4.77471e-06	8.89521e-06	6.10867e-06	0.000238815	6.50636e-05	7.12766e-06	4		4	4	3	4	4	3	3
LGKSEVELVQLVIDGVNYLIDCER	C22(Methylthio)	P25809	Creatine kinase U-type, mitochondrial OS=Rattus norvegicus GN=Ckmt1 PE=1 SV=1 - [KCRU_RAT]	2750.41	0	0	0	0	0	0	7.57054e+06	5.21364e+06	0	0	0	2.08837e+07							77.9	73.49				89.78							1.27312e-07	3.51455e-07				8.2053e-09							3	3
LYPPSAEYPDLR		P25809	Creatine kinase U-type, mitochondrial OS=Rattus norvegicus GN=Ckmt1 PE=1 SV=1 - [KCRU_RAT]	1420.71	9.50639e+07	1.9833e+07	4.26217e+08	3.72236e+08	373982540	0	503919995	0	4.90139e+08	2.63892e+08	3.41265e+08	2.86723e+08	67.74	64.9	80.86	87.11	87.07	80.55	80.88		87.13	87.12	87.28	80.8	7.31963e-07	1.39145e-06	3.48649e-08	9.82407e-09	9.91497e-09	4.36119e-08	3.79711e-08		8.90754e-09	8.44285e-09	8.60514e-09	3.61817e-08	2	2	2	2	2	2	2		2
LYPPSAEYPDLRK		P25809	Creatine kinase U-type, mitochondrial OS=Rattus norvegicus GN=Ckmt1 PE=1 SV=1 - [KCRU_RAT]	1548.8	0	0	3.26049e+08	0	205294048	0	0	0	264339969	0	0	6.7726e+07			51.59		47.38				47.61			51.15			4.29924e-05		0.000113342				0.000103161			4.60417e-05			2		2				2
RLEKGQDIR		P25809	Creatine kinase U-type, mitochondrial OS=Rattus norvegicus GN=Ckmt1 PE=1 SV=1 - [KCRU_RAT]	1114.63	0	0	0	0	0	1.26451e+07	0	0	0	1.66006e+07	1.72515e+07	7.55086e+06						39.9	30.54			47.84	35.54	44.62						0.000378618	0.0032674			5.91974e-05	0.00103324	0.000127703						3	2
SFLIWVNEEDHTR		P25809	Creatine kinase U-type, mitochondrial OS=Rattus norvegicus GN=Ckmt1 PE=1 SV=1 - [KCRU_RAT]	1645.79	0	0	0	7.10366e+06	0	0	3.57194e+07	0	2.4596e+07	0	26185269	2.14523e+07				43.26			80.47		76.88		57.89	87.21				0.000243112			4.66663e-08		1.0666e-07		6.90858e-06	1.0551e-08				2			2		2
TMKHTTDLDASK		P25809	Creatine kinase U-type, mitochondrial OS=Rattus norvegicus GN=Ckmt1 PE=1 SV=1 - [KCRU_RAT]	1347.66	0	6.0682e+06	1.64454e+07	0	2.37034e+07	0	1.75801e+07	0	2.40791e+07	2.87158e+07	0	0		66.47	62.77		39.91	48.34	60.25		52.19	65.82		59.51		9.91865e-07	2.378e-06		0.000444109	6.66824e-05	4.15387e-06		2.62718e-05	1.13891e-06		4.9815e-06		3	3		3	2	3		3
TMKHTTDLDASKIR		P25809	Creatine kinase U-type, mitochondrial OS=Rattus norvegicus GN=Ckmt1 PE=1 SV=1 - [KCRU_RAT]	1616.84	0	0	0	0	3.49676e+07	0	0	3.7793e+06	0	2.39805e+07	0	0					54.72			62.04		37.72							1.87194e-05			3.43845e-06		0.00100581							3			3
TTPTGWTLDQCIQTGVDNPGHPFIK	C11(Methylthio)	P25809	Creatine kinase U-type, mitochondrial OS=Rattus norvegicus GN=Ckmt1 PE=1 SV=1 - [KCRU_RAT]	2772.31	0	0	114374486	5.51639e+07	0	0	132692572	0	78215237	5.31388e+07	6.44337e+07	5.35742e+07			32.66	40.04			51.8		35.26	43.34	51.75	55.58			0.00330621	0.000648995			4.39361e-05		0.00196582	0.000308192	4.57816e-05	1.70167e-05			3	3			3		3
VVVDALSGLKGDLAGR		P25809	Creatine kinase U-type, mitochondrial OS=Rattus norvegicus GN=Ckmt1 PE=1 SV=1 - [KCRU_RAT]	1569.9	0	0	673163309	5.26522e+08	380559985	4.12556e+08	515087430	0	5.13084e+08	3.26277e+08	1.63158e+08	3.69085e+08	48.51	44.05	105.53	109.02	105.87	108.03	114.41	68.25	103.45	103.09	107.5	107.62	4.65065e-05	0.000110194	1.00763e-10	3.75942e-11	8.79992e-11	4.72195e-11	8.51271e-12	4.48871e-07	1.42335e-10	1.59545e-10	6.49072e-11	5.36243e-11	3	3	2	2	2	2	2	3	2
VVVDALSGLKGDLAGRYYR		P25809	Creatine kinase U-type, mitochondrial OS=Rattus norvegicus GN=Ckmt1 PE=1 SV=1 - [KCRU_RAT]	2052.12	0	0	5.4146e+07	0	8.34107e+07	3.79597e+07	0	0	12282807	0	0	30727273			57.54		40.91	46.96			37.41			40.04			8.01699e-06		0.000356823	8.7597e-05			0.00082606			0.00044092			3		3	3			3
CSQAVYAAEK	C1(Methylthio)	P47875	Cysteine and glycine-rich protein 1 OS=Rattus norvegicus GN=Csrp1 PE=2 SV=2 - [CSRP1_RAT]	1115.49	0	9.25732e+06	4.74318e+07	0	2.41013e+07	1.89952e+07	22314881	0	23375338	2.36907e+07	0	35283813		41.21	39.56		50.3	41.07	42.47		37.08	40.85		41.86		7.5504e-05	0.0001104		9.31044e-06	7.79776e-05	5.64898e-05		0.00019542	8.20295e-05		6.50085e-05		2	2		2	2	2		2
GLESTTLADKDGEIYCK	C16(Methylthio)	P47875	Cysteine and glycine-rich protein 1 OS=Rattus norvegicus GN=Csrp1 PE=2 SV=2 - [CSRP1_RAT]	1888.86	0	0	0	8.44792e+06	0	0	2.42937e+07	0	0	18947695	0	0				33.28			54.12			34.31						0.00164463			1.56839e-05			0.00148272						2			2
AIGTDEDLAHSSIR		Q99P39	Cysteine desulfurase, mitochondrial OS=Rattus norvegicus GN=Nfs1 PE=2 SV=1 - [NFS1_RAT]	1484.73	0	0	3.24314e+07	0	2.54229e+07	0	2.03329e+07	0	3.4577e+07	0	0	1.94425e+07			48.11		84.75		65.1		73.54			57.98			6.72186e-05		1.70832e-08		1.62241e-06		2.14655e-07			7.40377e-06			2		2		2		2
VLDAMLPYLVNYYGNPHSR		Q99P39	Cysteine desulfurase, mitochondrial OS=Rattus norvegicus GN=Nfs1 PE=2 SV=1 - [NFS1_RAT]	2222.11	0	0	0	1.36815e+08	9.76319e+07	0	6.81999e+07	0	0	0	9.92708e+07	8.32875e+07			73.96	82.07	66.18	58.61	77.27		71.17	82.37	77.34	65.32			2.75227e-07	4.15982e-08	1.65079e-06	1.01914e-05	1.34062e-07		5.65238e-07	3.99806e-08	1.26384e-07	2.02698e-06			2	3	3	3	3		2
ALSKDLPK		Q68FY0	Cytochrome b-c1 complex subunit 1, mitochondrial OS=Rattus norvegicus GN=Uqcrc1 PE=1 SV=1 - [QCR1_RAT]	871.524	2.63579e+06	0	0	0	0	0	0	1.5421e+06	227252397	0	0	0	47.29							34.79	40.12				6.15905e-05							0.00116163	0.000321007				2							2	2
EHTAYLIK		Q68FY0	Cytochrome b-c1 complex subunit 1, mitochondrial OS=Rattus norvegicus GN=Uqcrc1 PE=1 SV=1 - [QCR1_RAT]	974.53	0	0	1.93462e+08	1.45162e+08	143597528	108151384	0	0	0	0	1.43562e+08	1.64356e+08			30.73	40.12	40.13	42.52					33.88	32.64			0.00418413	0.00048151	0.000480402	0.00027708					0.00202584	0.00269529			2	2	2	2
FTGSEIR		Q68FY0	Cytochrome b-c1 complex subunit 1, mitochondrial OS=Rattus norvegicus GN=Uqcrc1 PE=1 SV=1 - [QCR1_RAT]	809.415	0	0	1.51067e+08	1.21913e+08	9.41635e+07	1.26927e+08	183800836	3.74397e+06	190740242	1.03869e+08	0	8.37707e+07			32.5	40.56	41.8	40.46	42.92	44.84	43.02	42.98		43.04			0.00171514	0.000268102	0.000201512	0.000274347	0.000155704	0.000100069	0.00015216	0.000153568		0.000151461			2	2	2	2	2	2	2
HQQLLDLAQDHFSSVSQVYEEDAVPSITPCR	C30(Methylthio)	Q68FY0	Cytochrome b-c1 complex subunit 1, mitochondrial OS=Rattus norvegicus GN=Uqcrc1 PE=1 SV=1 - [QCR1_RAT]	3558.66	0	0	1.11463e+08	0	0	9.28716e+07	182150649	238296759	141774473	7.94221e+07	0	0			47.68			41.39	51.63	31.74	41.1	50.49					0.000145017			0.000602668	5.66831e-05	0.00549305	0.000640404	7.54843e-05					3			3	3	3	3
LCTSATESEVTR	C2(Methylthio)	Q68FY0	Cytochrome b-c1 complex subunit 1, mitochondrial OS=Rattus norvegicus GN=Uqcrc1 PE=1 SV=1 - [QCR1_RAT]	1342.6	0	0	0	15206466	0	0	3.78328e+07	0	0	0	1.47448e+07	1.8563e+07				36.06			74.43				46.01	55.39				0.000569807			8.65389e-08				6.01466e-05	7.2267e-06				2			2
LSRTDLTDYLSR		Q68FY0	Cytochrome b-c1 complex subunit 1, mitochondrial OS=Rattus norvegicus GN=Uqcrc1 PE=1 SV=1 - [QCR1_RAT]	1439.74	0	0	0	0	5.62877e+07	0	16492945	8493605	0	2.17312e+07	0	36623992					42.83		39.93	43.26		40.01		49.82					0.000179812		0.000411581	0.000191186		0.000443977		4.16927e-05					3		3	3
MVLAAAGGVK	M1(Oxidation)	Q68FY0	Cytochrome b-c1 complex subunit 1, mitochondrial OS=Rattus norvegicus GN=Uqcrc1 PE=1 SV=1 - [QCR1_RAT]	932.522	0	0	4.75775e+07	0	3.53134e+07	0	0	0	0	0	0	22464805			41.53		47.13							31.96			0.000390205		0.000107471							0.00184671			2		2
MVLAAAGGVK		Q68FY0	Cytochrome b-c1 complex subunit 1, mitochondrial OS=Rattus norvegicus GN=Uqcrc1 PE=1 SV=1 - [QCR1_RAT]	916.529	6.26295e+07	8.23689e+07	5.60996e+08	0	2.41595e+08	0	2.46119e+08	5.04802e+07	0	2.01106e+08	0	3.05211e+08	59.51	65.07	61.69		65.67		63.99	65.67		67.63		49.61	4.92553e-06	1.21357e-06	2.6428e-06		1.20604e-06		1.53625e-06	1.04342e-06		7.59369e-07		5.41508e-05	2	2	2		2		2	2
NALISHLDGTTPVCEDIGR	C14(Methylthio)	Q68FY0	Cytochrome b-c1 complex subunit 1, mitochondrial OS=Rattus norvegicus GN=Uqcrc1 PE=1 SV=1 - [QCR1_RAT]	2056.98	0	0	3.04914e+08	1.31718e+08	2.00199e+08	1.99143e+08	1.15244e+08	0	1.3851e+08	9.50865e+07	1.21807e+08	1.12128e+08			66.54	71.14	54.79	71.43	71.57		46.55	44.4	71.68	77.54			1.2311e-06	4.57633e-07	1.97477e-05	4.20878e-07	4.14493e-07		0.000130573	0.000196062	4.04126e-07	1.03076e-07			2	2	2	2	2		2
NRPGNALEKEVESIGAHLNAYSTR	N19(Deamidated)	Q68FY0	Cytochrome b-c1 complex subunit 1, mitochondrial OS=Rattus norvegicus GN=Uqcrc1 PE=1 SV=1 - [QCR1_RAT]	2627.31	0	0	38037747	0	0	0	0	0	28293952	0	2.4001e+07	0			49.9						32.5		41.86				9.10731e-05						0.00497672		0.000579949				4						4
NRPGNALEKEVESIGAHLNAYSTR		Q68FY0	Cytochrome b-c1 complex subunit 1, mitochondrial OS=Rattus norvegicus GN=Uqcrc1 PE=1 SV=1 - [QCR1_RAT]	2626.33	0	0	0	3.43819e+08	4.26623e+08	0	0	111631025	3.55376e+08	3.05524e+08	3.73259e+08	3.75274e+08			34.2	62.01	81.36	36.05	31.42	81.81	66.94	86.83	84.26	66.45			0.00336468	5.53965e-06	6.61681e-08	0.00217274	0.00674235	5.99848e-08	1.88141e-06	1.89855e-08	3.48725e-08	2.10612e-06			4	3	3	4	4	3	3
SGMFWLR		Q68FY0	Cytochrome b-c1 complex subunit 1, mitochondrial OS=Rattus norvegicus GN=Uqcrc1 PE=1 SV=1 - [QCR1_RAT]	896.445	0	0	2.20239e+07	3.67301e+07	1.22723e+07	1.1201e+07	4.88244e+07	0	3.93772e+07	15101046	2.08871e+07	3.1877e+07			50.51	53.4	47.9	53.32	50.51		50.48	48	47.86	53.43			3.02328e-05	1.25699e-05	4.45998e-05	1.11741e-05	2.17854e-05		2.14888e-05	3.80374e-05	3.92836e-05	1.08946e-05			2	2	2	2	2		2
SGMFWLRF		Q68FY0	Cytochrome b-c1 complex subunit 1, mitochondrial OS=Rattus norvegicus GN=Uqcrc1 PE=1 SV=1 - [QCR1_RAT]	1043.51	0	0	2.2051e+07	1.36276e+07	2.65349e+07	0	0	0	1.23121e+07	0	2.64995e+07	6.50157e+07			35.8	36.49	37.66				37.82		37.56	35.93			0.00068387	0.00056097	0.000454199				0.000379951		0.000456009	0.000587121			2	2	2				2
SLLTYGR		Q68FY0	Cytochrome b-c1 complex subunit 1, mitochondrial OS=Rattus norvegicus GN=Uqcrc1 PE=1 SV=1 - [QCR1_RAT]	809.452	0	2.4012e+07	107207380	9.57315e+07	66273902	8.54963e+07	127734135	4.26173e+06	156611336	6.69612e+07	109454627	7.78597e+07		31.84	37.87	35.51	37.84	35.44	35.45	34.73	35.41	35.44	35.58	50.42		0.00108015	0.000269454	0.000463964	0.000271321	0.000471502	0.000470418	0.000555244	0.000474771	0.000471502	0.000456545	1.4979e-05		2	2	2	2	2	2	2	2
TDLTDYLSR		Q68FY0	Cytochrome b-c1 complex subunit 1, mitochondrial OS=Rattus norvegicus GN=Uqcrc1 PE=1 SV=1 - [QCR1_RAT]	1083.53	4.52213e+07	2.21099e+07	1.75298e+08	2.04018e+08	1.55716e+08	2.43064e+08	1.99839e+08	0	0	1.47686e+08	148443363	1.14049e+08	45.3	47.48	71.11	60.3	67.17	61.93	61.93			67.21	59.86	68.17	5.6073e-05	4.37689e-05	1.89743e-07	2.3798e-06	4.70074e-07	1.63508e-06	1.63508e-06			4.84775e-07	2.06552e-06	2.8957e-07	2	2	2	2	2	2	2
YFYDQCPAVAGYGPIEQLSDYNR	C6(Methylthio)	Q68FY0	Cytochrome b-c1 complex subunit 1, mitochondrial OS=Rattus norvegicus GN=Uqcrc1 PE=1 SV=1 - [QCR1_RAT]	2715.19	0	0	8.78727e+07	27151015	0	0	0	0	0	0	4.2933e+07	0			57.86	36.64							45.55				6.71095e-06	0.000867082							8.91559e-05				2	2
AVAFQNPQTR		P32551	Cytochrome b-c1 complex subunit 2, mitochondrial OS=Rattus norvegicus GN=Uqcrc2 PE=1 SV=2 - [QCR2_RAT]	1131.59	0	0	0	47212590	0	38026281	75052830	0	0	0	0	0				33.63		34.12	38.34									0.00214588		0.00191693	0.00077674									2		2	2
AVAQGNLSSADVQAAK		P32551	Cytochrome b-c1 complex subunit 2, mitochondrial OS=Rattus norvegicus GN=Uqcrc2 PE=1 SV=2 - [QCR2_RAT]	1529.79	0	7.63084e+07	242284193	0	208575558	0	1.95345e+08	68161959	234350300	0	0	0		70.52	78.46		70.22		62.39	84.28	70.86					6.03266e-07	8.19724e-08		5.6561e-07		3.80666e-06	2.5381e-08	4.96313e-07					2	2		2		2	2	2
GNNTTSLLSQSVAK		P32551	Cytochrome b-c1 complex subunit 2, mitochondrial OS=Rattus norvegicus GN=Uqcrc2 PE=1 SV=2 - [QCR2_RAT]	1419.74	0	2.31054e+07	0	0	5.83073e+07	118877104	0	1.60271e+07	0	0	0	0		75.38			56.95	75.92	37.3	82.45						2.05711e-07			1.43304e-05	1.68867e-07	0.00122898	3.95353e-08						2			2	2	2	2
IIENLHDVAYKNALANPLYCPDYR	C20(Methylthio)	P32551	Cytochrome b-c1 complex subunit 2, mitochondrial OS=Rattus norvegicus GN=Uqcrc2 PE=1 SV=2 - [QCR2_RAT]	2851.39	0	0	27471961	89258486	0	0	4.55943e+07	0	0	6.08133e+07	8.37033e+07	6.66394e+07			55.02	36.58			76.82			71.93	40.72	76			2.70706e-05	0.0018462			1.80934e-07			5.45028e-07	0.000703199	2.16022e-07			3	3			3
ITSEELHYFVQNHFTSAR		P32551	Cytochrome b-c1 complex subunit 2, mitochondrial OS=Rattus norvegicus GN=Uqcrc2 PE=1 SV=2 - [QCR2_RAT]	2179.06	0	0	0	0	0	0	4.44125e+07	0	0	0	2.01164e+07	2.49088e+07							48.31				36.79	52.57							0.000101824				0.00145541	3.76278e-05							3
NALANPLYCPDYR	C9(Methylthio)	P32551	Cytochrome b-c1 complex subunit 2, mitochondrial OS=Rattus norvegicus GN=Uqcrc2 PE=1 SV=2 - [QCR2_RAT]	1555.7	0	0	3.54338e+07	4.45033e+07	0	0	6.58156e+07	0	5.54975e+07	0	0	0			51.17	51.51			51.52		41.94						2.90258e-05	2.29553e-05			2.18455e-05		0.000233503						2	2			2		2
RGNNTTSLLSQSVAK		P32551	Cytochrome b-c1 complex subunit 2, mitochondrial OS=Rattus norvegicus GN=Uqcrc2 PE=1 SV=2 - [QCR2_RAT]	1575.85	0	7.65738e+06	1.85659e+08	8.93428e+07	7.45787e+07	7.96559e+07	7.29311e+07	0	6.08869e+07	6.63559e+07	7.36716e+07	8.07211e+07		61.28	37.92	33.38	52.37	56.22	50.9		37.14	47.61	45.27	51.63		4.31945e-06	0.000976687	0.00277815	3.53452e-05	1.44463e-05	4.91762e-05		0.00116884	0.000104895	0.000187215	4.15676e-05		2	2	2	2	2	2		2
GREFGNLTR		Q7TQ16	Cytochrome b-c1 complex subunit 8 OS=Rattus norvegicus GN=Uqcrq PE=2 SV=1 - [QCR8_RAT]	1049.55	0	0	1.91414e+08	1.27466e+08	1.6534e+08	1.11989e+08	1.58497e+08	0	0	9.25383e+07	9.76068e+07	9.45854e+07		37.4	46.16	42.93	40.96	46.04	43.89			35.17	44.65	47.04		0.00072788	7.26309e-05	0.000152799	0.000240503	9.95543e-05	0.000163328			0.000897061	0.00010283	5.93091e-05		2	2	2	2	2	2
HVISYSLSPFEQR		Q7TQ16	Cytochrome b-c1 complex subunit 8 OS=Rattus norvegicus GN=Uqcrq PE=2 SV=1 - [QCR8_RAT]	1562.8	0	0	9.43751e+07	5.31466e+07	0	31927104	0	0	0	4.19576e+07	4.98816e+07	0			67.44	31.1		47.63				58.38	60.97				1.02772e-06	0.00461867		9.83728e-05				8.27704e-06	4.51906e-06				2	2		2
IRHVISYSLSPFEQR		Q7TQ16	Cytochrome b-c1 complex subunit 8 OS=Rattus norvegicus GN=Uqcrq PE=2 SV=1 - [QCR8_RAT]	1831.97	0	0	0	0	0	0	0	0	0	11307297	14665299	1.40026e+07							52.97		45.28	40.38	59.29	53.04							2.80087e-05		0.00017789	0.00054057	6.77123e-06	3.05404e-05							3		3
EIDQEAAVEVSQLRDPQHDLER		P20788	Cytochrome b-c1 complex subunit Rieske, mitochondrial OS=Rattus norvegicus GN=Uqcrfs1 PE=1 SV=2 - [UCRI_RAT]	2577.24	0	0	0	0	0	3.31887e+07	4.99782e+07	2.8082e+07	34034338	1.39735e+07	0	0						51.66	61.17	41.24	37.59	39.73								5.59518e-05	5.46143e-06	0.000582508	0.00145441	0.000814069								3	3	3	3
GKPLFVR		P20788	Cytochrome b-c1 complex subunit Rieske, mitochondrial OS=Rattus norvegicus GN=Uqcrfs1 PE=1 SV=2 - [UCRI_RAT]	816.509	0	1.95278e+07	351440253	413594784	452771898	358518772	298940660	0	509663177	1.87533e+08	2.0466e+08	244325549		34.06	35.99	34.97	33.74	34.97	30.45		32.66	38	33.82	35.01		0.000804922	0.000516124	0.00065276	0.000866471	0.00065276	0.00184822		0.0011111	0.000324903	0.000850656	0.000646776		2	2	2	2	2	2		2
RAEVLDSTK		P20788	Cytochrome b-c1 complex subunit Rieske, mitochondrial OS=Rattus norvegicus GN=Uqcrfs1 PE=1 SV=2 - [UCRI_RAT]	1018.55	0	1.4822e+07	0	0	0	0	0	1.12269e+06	0	5.36246e+07	0	0		51.03						30.95		47.63				4.45706e-05						0.00453992		9.75098e-05				2						2
SGPFAPVLSATSR		P20788	Cytochrome b-c1 complex subunit Rieske, mitochondrial OS=Rattus norvegicus GN=Uqcrfs1 PE=1 SV=2 - [UCRI_RAT]	1289.68	0	0	0	0	516610923	3.08791e+08	1.71942e+07	0	0	0	361006288	0	45.76	35.85		52.01	47.21	43.03	41.8			50.36	56.41	53.85	0.000136712	0.00107907		2.61245e-05	0.000102658	0.000214027	0.000274188			4.60225e-05	1.09709e-05	1.81323e-05	2	2		2	2	2	2
TKKEIDQEAAVEVSQLRDPQHDLER		P20788	Cytochrome b-c1 complex subunit Rieske, mitochondrial OS=Rattus norvegicus GN=Uqcrfs1 PE=1 SV=2 - [UCRI_RAT]	2934.49	0	0	0	7.78759e+07	6.46641e+07	4.80893e+07	91716308	5.61713e+07	101746608	0	0	0				49.73	61.59	31.15	51.04	65.47	52.67							8.83239e-05	5.75543e-06	0.00736667	7.24082e-05	2.69602e-06	5.13717e-05							4	4	4	4	4	4
LLEVDNR		P00406	Cytochrome c oxidase subunit 2 OS=Rattus norvegicus GN=Mtco2 PE=2 SV=2 - [COX2_RAT]	858.469	0	8.19505e+06	0	0	0	0	7.19442e+07	0	57321103	2.0245e+07	0	0		31.9					43.94		37.21	33.79				0.00258262					0.000161458		0.000750926	0.00165043				2					2		2
LLEVDNRVVLPMELPIR		P00406	Cytochrome c oxidase subunit 2 OS=Rattus norvegicus GN=Mtco2 PE=2 SV=2 - [COX2_RAT]	2006.15	5.93181e+06	0	9.08928e+08	7.84981e+08	4.27214e+08	5.16409e+08	704047262	0	7.25405e+08	4.9319e+08	0	460810024	35.36		42.18	58.13	54.83	58.58	52.45	65.18	70.08	58.64	44.44	52.34	0.000553036		0.000145282	2.76868e-06	5.91933e-06	2.63484e-06	1.08082e-05	5.76439e-07	1.76715e-07	2.32514e-06	6.47549e-05	1.40027e-05	3		3	3	3	3	3	2	3
VVLPMELPIR		P00406	Cytochrome c oxidase subunit 2 OS=Rattus norvegicus GN=Mtco2 PE=2 SV=2 - [COX2_RAT]	1166.7	0	0	134047792	1.55844e+08	5.53239e+07	101280766	324130989	0	316570839	8.1401e+07	1.53736e+08	8.70602e+07			56.38	55.94	62.5	55.64	51.95		47.72	50.55	66.72	62.77			3.56723e-06	4.45695e-06	9.84097e-07	4.77571e-06	1.24461e-05		2.95827e-05	1.7621e-05	2.87299e-07	9.24779e-07			2	2	2	2	2		2
ADWSSLSRDEK		P10888	Cytochrome c oxidase subunit 4 isoform 1, mitochondrial OS=Rattus norvegicus GN=Cox4i1 PE=1 SV=1 - [COX41_RAT]	1293.61	0	3.21709e+06	0	0	0	0	0	0	0	4.43581e+07	4.20623e+07	5.33111e+07		46.61								31.67	43.68	33.05		8.62178e-05								0.00268904	0.000169277	0.00203135		2
DYPLPDVAHVK		P10888	Cytochrome c oxidase subunit 4 isoform 1, mitochondrial OS=Rattus norvegicus GN=Cox4i1 PE=1 SV=1 - [COX41_RAT]	1253.65	1.11755e+08	4.2728e+07	828641517	8.32666e+08	0	8.21716e+08	1.2667e+09	34639778	1290180972	6.08359e+08	589217288	0	33.51	39.19	39.33	38.7		35.01	37.19	37.25	37.26	39.64	37.09		0.002206	0.000650719	0.000630077	0.000708206		0.00165638	0.00102177	0.00101717	0.00101483	0.00058667	0.000830594		2	2	2	2		2	2	2	2
LLSASQK		P10888	Cytochrome c oxidase subunit 4 isoform 1, mitochondrial OS=Rattus norvegicus GN=Cox4i1 PE=1 SV=1 - [COX41_RAT]	746.441	0	36422027	0	6.31633e+07	0	0	0	2.95637e+06	0	5.59441e+07	4.26065e+07	3.44095e+07		41.16		41.66				43.72		44.53	37.55	44.06		0.000294755		0.0002627				0.000163479		0.000135663	0.000676801	0.000151168		2		2				2
MLDMKVNPIQGFSAK		P10888	Cytochrome c oxidase subunit 4 isoform 1, mitochondrial OS=Rattus norvegicus GN=Cox4i1 PE=1 SV=1 - [COX41_RAT]	1678.86	0	0	4.51412e+07	4.38177e+07	0	40895246	0	0	0	0	3.34898e+07	0			43.89	53.95	55.76	42.76				36.72	61.75	48.52			0.000251116	2.77875e-05	1.76531e-05	0.000365468				0.00146842	4.14373e-06	9.49082e-05			2	2	3	2
MLDMKVNPIQGFSAK	M4(Oxidation)	P10888	Cytochrome c oxidase subunit 4 isoform 1, mitochondrial OS=Rattus norvegicus GN=Cox4i1 PE=1 SV=1 - [COX41_RAT]	1694.86	0	0	0	0	46846749	0	0	0	1.78824e+07	1.74219e+07	1.06191e+07	0					76.44				63.12	60.06	47.98						1.40732e-07				3.58333e-06	6.21356e-06	0.000116231						2				2
VNPIQGFSAK		P10888	Cytochrome c oxidase subunit 4 isoform 1, mitochondrial OS=Rattus norvegicus GN=Cox4i1 PE=1 SV=1 - [COX41_RAT]	1060.58	6.13483e+07	7.52452e+07	515909192	185145580	352308705	292957148	275548552	0	583996821	0	1.82233e+08	260409922	38.55	54.34	54.41	54.42	54.25	47.63	53.11		61.04		50.2	53.7	0.000705166	1.63817e-05	1.61198e-05	1.86126e-05	1.67248e-05	8.02515e-05	2.51656e-05		4.05329e-06		3.91547e-05	1.98359e-05	2	2	2	2	2	2	2		2
WDYNKNEWKK		P10888	Cytochrome c oxidase subunit 4 isoform 1, mitochondrial OS=Rattus norvegicus GN=Cox4i1 PE=1 SV=1 - [COX41_RAT]	1410.68	0	0	6.1621e+07	0	0	0	7.98003e+07	0	0	3.61055e+07	5.4983e+07	0			36.74	30.68			43.62			32.45	36.32				0.000868528	0.00376229			0.000180322			0.00236074	0.000968385				2	3			2
AGPHKEIYPYVIQELRPTLNELGISTPEELGLDKV		P11240	Cytochrome c oxidase subunit 5A, mitochondrial OS=Rattus norvegicus GN=Cox5a PE=1 SV=1 - [COX5A_RAT]	3919.09	0	0	0	7.96457e+07	0	4.4822e+07	78074825	0	7.97284e+07	7.0514e+07	0	9.56108e+07				33.78		34.24	36.46		33.88	39.86		33.85				0.0014239		0.00129963	0.000779505		0.00145288	0.000351139		0.00135992				3		3	3		3
GMNTLVGYDLVPEPK		P11240	Cytochrome c oxidase subunit 5A, mitochondrial OS=Rattus norvegicus GN=Cox5a PE=1 SV=1 - [COX5A_RAT]	1632.83	0	0	0	0	265424314	2.08911e+08	0	0	0	0	0	1.87717e+08					35.27	33.18					31.62	33.83					0.00184243	0.00288504					0.00413191	0.0025875					2	2
IIDAALR		P11240	Cytochrome c oxidase subunit 5A, mitochondrial OS=Rattus norvegicus GN=Cox5a PE=1 SV=1 - [COX5A_RAT]	771.472	0	1.4392e+08	4.46139e+08	0	0	3.08328e+08	3.55288e+08	0	0	3.2962e+08	0	0		52.68	53.46			33.02	44.2			47.25				1.34878e-05	1.12704e-05			0.00124721	9.50473e-05			4.70912e-05				2	2			2	2
ILEVVK		P11240	Cytochrome c oxidase subunit 5A, mitochondrial OS=Rattus norvegicus GN=Cox5a PE=1 SV=1 - [COX5A_RAT]	700.46	0	8.11825e+06	36292774	0	0	0	4.20561e+07	0	2.18167e+07	1.92524e+07	1.04847e+07	1.37436e+07		45.74	45.82				38.42		32.81	34.6	31.12	32.19		9.46735e-05	9.29455e-05				0.000510773		0.00185878	0.00123092	0.00274302	0.00214402		2	2				2		2
ILEVVKDK		P11240	Cytochrome c oxidase subunit 5A, mitochondrial OS=Rattus norvegicus GN=Cox5a PE=1 SV=1 - [COX5A_RAT]	943.582	0	4.00986e+07	448328752	2.28136e+08	0	1.76734e+08	2.32954e+08	0	0	1.81258e+08	0	2.21196e+08		57.06	57.19	57.12		57.11	57.08			57.07		57.14		3.34541e-06	3.24675e-06	3.10542e-06		3.30711e-06	3.33004e-06			3.33771e-06		3.28435e-06		2	2	2		2	2
LNDFASAVR		P11240	Cytochrome c oxidase subunit 5A, mitochondrial OS=Rattus norvegicus GN=Cox5a PE=1 SV=1 - [COX5A_RAT]	992.516	0	4.44653e+07	1.8241e+08	0	0	0	0	6.05279e+06	153405623	108393760	3.66716e+07	100765003		57.18	71.19					42.98	71.18	71.32	71.29	66.23		4.97707e-06	2.88924e-07					0.000133428	2.01951e-07	1.91855e-07	1.93185e-07	6.31315e-07		2	2					2	2
RLNDFASAVR	N3(Deamidated)	P11240	Cytochrome c oxidase subunit 5A, mitochondrial OS=Rattus norvegicus GN=Cox5a PE=1 SV=1 - [COX5A_RAT]	1149.6	1.86663e+07	0	0	109236012	1.64598e+08	3.47272e+07	0	0	0	4.68768e+07	0	0	42.94			57.98	50.99	35.02				57.88			0.00019056			6.28922e-06	3.78176e-05	0.00149518				8.39087e-06			2			2	2	2
RLNDFASAVR		P11240	Cytochrome c oxidase subunit 5A, mitochondrial OS=Rattus norvegicus GN=Cox5a PE=1 SV=1 - [COX5A_RAT]	1148.62	0	0	764724754	5.37971e+08	571442234	2.37174e+08	423301982	0	4.55452e+08	3.59869e+08	392853513	4.32565e+08			61.7	57.77	58.51	64.61	48.57		58.8	48.95	62.13	58.89			2.67053e-06	6.76792e-06	5.56669e-06	1.36646e-06	4.72584e-05		5.20711e-06	5.03034e-05	2.17384e-06	3.93822e-06			2	2	2	2	2		2
WVTYFNKPDIDAWELR		P11240	Cytochrome c oxidase subunit 5A, mitochondrial OS=Rattus norvegicus GN=Cox5a PE=1 SV=1 - [COX5A_RAT]	2053.02	0	0	95365929	0	58529160	3.14059e+07	0	0	0	4.04214e+07	0	0			59.96	51.98	59.63	41.8			67.45	59.76	64.47				7.72078e-06	4.97588e-05	8.33032e-06	0.000518644			1.34915e-06	8.08465e-06	2.80459e-06				3	2	3	3			2
WVTYFNKPDIDAWELRK		P11240	Cytochrome c oxidase subunit 5A, mitochondrial OS=Rattus norvegicus GN=Cox5a PE=1 SV=1 - [COX5A_RAT]	2181.1	0	0	1.16862e+09	0	1.03805e+09	0	716445020	1.25577e+08	839996623	0	0	5.23154e+08			70.42	34.09	59.96		58.94	57.91	70.28	43.27	34.41	56			8.12499e-07	0.00329501	9.08328e-06		1.07859e-05	1.31874e-05	7.9224e-07	0.00042388	0.00302473	2.08487e-05			3	4	3		3	3	3
KKAYADFYR		P11951	Cytochrome c oxidase subunit 6C-2 OS=Rattus norvegicus GN=Cox6c2 PE=1 SV=3 - [CX6C2_RAT]	1161.6	0	0	0	0	1.98172e+07	0	0	0	19545738	2.32624e+07	1.84342e+07	2.29068e+07			54.01	50.8	39.41			46.47	46.5	48.45	37.85	47.09			2.54203e-05	5.32329e-05	0.000698763			0.000137509	0.000143278	9.14492e-05	0.00104998	0.000125078			2	2	3			2	3
NYDSMKDFEEMR		P11951	Cytochrome c oxidase subunit 6C-2 OS=Rattus norvegicus GN=Cox6c2 PE=1 SV=3 - [CX6C2_RAT]	1564.63	0	0	57152419	6.69054e+07	0	0	98149891	0	9.15026e+07	0	3.88228e+07	0			66.6	65.23			71.2	38.94	69.43		66.92	70.66			2.18258e-07	2.99206e-07			7.56781e-08	0.000127342	1.13755e-07		2.02754e-07	8.56979e-08			2	2			2	3	2
FLSDPQVHTVLVER		P38650	Cytoplasmic dynein 1 heavy chain 1 OS=Rattus norvegicus GN=Dync1h1 PE=1 SV=1 - [DYHC1_RAT]	1639.89	0	0	6.70147e+07	0	38566373	2.39457e+07	2.61719e+07	0	0	0	0	4.645e+07			74.79		57.32	61.75	52.09					63.99			1.2612e-07		7.87751e-06	2.97413e-06	2.62657e-05					1.79561e-06			2		2	2	2
FNRYPLIIDPSGQATEFIMNEYKDR		P38650	Cytoplasmic dynein 1 heavy chain 1 OS=Rattus norvegicus GN=Dync1h1 PE=1 SV=1 - [DYHC1_RAT]	3017.48	0	0	0	57193980	0	35084837	4.21676e+07	0	46297233	0	6.06163e+07	5.92509e+07				34.48		33.3	34.44		39.46		38.71	39.39				0.00317242		0.00411607	0.00321976		0.0010135		0.00121127	0.0010012				4		4	4		4
GKEIVLSAGSTPK		P38650	Cytoplasmic dynein 1 heavy chain 1 OS=Rattus norvegicus GN=Dync1h1 PE=1 SV=1 - [DYHC1_RAT]	1286.73	0	0	2.89134e+07	0	0	12342120	0	2.76986e+06	0	9.57411e+06	1.3454e+07	0			49.84			76.42		65.6		64.81	73.02				3.89073e-05			7.18308e-08		8.81353e-07		1.00763e-06	1.87082e-07				2			2		2
ILDDDTIITTLENLKR		P38650	Cytoplasmic dynein 1 heavy chain 1 OS=Rattus norvegicus GN=Dync1h1 PE=1 SV=1 - [DYHC1_RAT]	1873.03	0	0	1.10553e+08	68058270	6.71064e+07	5.56499e+07	9.42532e+07	7.1322e+06	9.15676e+07	3.9898e+07	0	3.71844e+07			51.16	47.94	40.63	54.56	50.74	44.06	33.87	30.37		45.99			3.7897e-05	6.99019e-05	0.000389236	1.59225e-05	3.66851e-05	0.000174727	0.00186643	0.00399475		0.00011959			3	3	3	3	3	3	3
KFLSDPQVHTVLVER		P38650	Cytoplasmic dynein 1 heavy chain 1 OS=Rattus norvegicus GN=Dync1h1 PE=1 SV=1 - [DYHC1_RAT]	1767.98	0	0	0	6.29415e+07	8.06439e+07	0	0	0	0	63362537	6.52074e+07	9.43484e+07				63.78	60.43					41.25	53.91	54.1				1.61236e-06	3.12478e-06					0.000251215	1.36159e-05	1.47837e-05				3	3
KLVPLLLEDGGDAPAALEAALEEK		P38650	Cytoplasmic dynein 1 heavy chain 1 OS=Rattus norvegicus GN=Dync1h1 PE=1 SV=1 - [DYHC1_RAT]	2462.34	0	0	1.21539e+08	9.2324e+07	1.15128e+08	9.14777e+07	7.00783e+07	0	1.13106e+08	6.37873e+07	0	7.90746e+07			70.78	69.92	65.44	61.17	78.89		72.92	69.71		82.57			3.38419e-07	4.1253e-07	1.11446e-06	3.09353e-06	3.55085e-08		2.04202e-07	4.16931e-07		2.2134e-08			3	3	3	3	3		3
TKPVTGNLRPEEALQALTIYEGK		P38650	Cytoplasmic dynein 1 heavy chain 1 OS=Rattus norvegicus GN=Dync1h1 PE=1 SV=1 - [DYHC1_RAT]	2528.37	0	0	1.29176e+08	0	0	0	6.21468e+07	1.68825e+07	0	0	0	0			39.68				31.42	33.83		32.5					0.000435968				0.00259599	0.0016974		0.00233372					4				4	4
TLHTTASNWLHLIPQTLSPLKR		P38650	Cytoplasmic dynein 1 heavy chain 1 OS=Rattus norvegicus GN=Dync1h1 PE=1 SV=1 - [DYHC1_RAT]	2527.41	0	0	0	1.25232e+08	77769943	0	82569310	0	0	0	1.33232e+08	1.16598e+08				35.8	34.79		30.4		31.44	39.9	32.12	30.49				0.000565508	0.000713573		0.00196082		0.00168682	0.000225124	0.00135028	0.00192061				3	3		3		4
TTDLLTDWEK		P38650	Cytoplasmic dynein 1 heavy chain 1 OS=Rattus norvegicus GN=Dync1h1 PE=1 SV=1 - [DYHC1_RAT]	1221.6	0	0	0	28851267	0	38209768	0	0	3.41331e+07	0	0	0				61.05		60.53			60.62							3.41578e-06		3.36344e-06			3.81463e-06							2		2			2
WQASSLPADDLCTENAIMLKR	C12(Methylthio)	P38650	Cytoplasmic dynein 1 heavy chain 1 OS=Rattus norvegicus GN=Dync1h1 PE=1 SV=1 - [DYHC1_RAT]	2408.14	0	0	3.48288e+07	0	2.95125e+07	0	0	0	3.4734e+07	0	0	0			50.99		51.26				59.32						4.93619e-05		4.90051e-05				7.66022e-06						3		3				3
LGGSVELVDIGKQKLPDGSEIPLPPILLGK		Q6Q0N1	Cytosolic non-specific dipeptidase OS=Rattus norvegicus GN=Cndp2 PE=1 SV=1 - [CNDP2_RAT]	3082.77	0	0	44042722	0	3.7809e+07	2.5431e+07	0	0	1.00717e+07	1.68872e+07	2.80551e+07	0			36.15		33.5	31.66			43.28	56.57	37.27				0.000242086		0.000445625	0.000680722			4.68781e-05	2.19771e-06	0.000187055				3		3	3			3
QKLPDGSEIPLPPILLGK		Q6Q0N1	Cytosolic non-specific dipeptidase OS=Rattus norvegicus GN=Cndp2 PE=1 SV=1 - [CNDP2_RAT]	1915.12	0	0	0	2.89045e+07	0	1.95836e+07	3.25034e+07	0	0	0	0	0				32.84		32.16	30.01				31.81					0.000597995		0.000638542	0.000995337				0.00075805					3		3	3
AGTGVDNVDLEAATR		O08651	D-3-phosphoglycerate dehydrogenase OS=Rattus norvegicus GN=Phgdh PE=1 SV=3 - [SERA_RAT]	1488.73	0	2.6597e+07	0	0	5.10683e+07	0	31914581	0	0	0	0	2.89621e+07		97.99			97.58		98.12		99.82			103.18		7.30732e-10			8.8164e-10		6.55223e-10		4.22139e-10			2.21186e-10		2			2		2		2
ALQSGQCAGAALDVFTEEPPRDR	C7(Methylthio)	O08651	D-3-phosphoglycerate dehydrogenase OS=Rattus norvegicus GN=Phgdh PE=1 SV=3 - [SERA_RAT]	2477.15	0	0	68651942	0	0	0	6.44253e+07	0	54586948	0	6.55689e+07	6.36946e+07			48.42				51.83		32.77		31.11	45.51			8.56085e-05				4.39617e-05		0.00340847		0.00518889	0.000181368			3				3		3
ALVDHENVISCPHLGASTK	C11(Methylthio)	O08651	D-3-phosphoglycerate dehydrogenase OS=Rattus norvegicus GN=Phgdh PE=1 SV=3 - [SERA_RAT]	2036.98	0	0	228434282	0	1.41803e+08	0	0	2.4573e+07	108229544	0	1.04288e+08	125210895			53.7	43.41	58.09	54.74	69.69	57.37	71.38		51.82	34.84			2.81542e-05	0.000266782	9.85766e-06	2.21587e-05	6.92723e-07	1.18184e-05	4.58501e-07		4.43919e-05	0.00213262			3	2	3	3	3	3	3
CGEEIAVQFVDMVK	C1(Methylthio)	O08651	D-3-phosphoglycerate dehydrogenase OS=Rattus norvegicus GN=Phgdh PE=1 SV=3 - [SERA_RAT]	1613.74	0	0	0	0	3.63224e+07	0	40540549	4.32456e+07	3.55687e+07	0	24237798	2.88471e+07					41.23		46.09	46.76	49.09		49.09	37.38					0.000282508		8.48827e-05	8.11822e-05	4.62414e-05		4.62414e-05	0.000584992					2		2	2	2
GGIVDEGALLR		O08651	D-3-phosphoglycerate dehydrogenase OS=Rattus norvegicus GN=Phgdh PE=1 SV=3 - [SERA_RAT]	1099.61	0	0	0	6.05624e+07	0	8.30949e+07	7.94668e+07	0	7.97005e+07	0	2.96843e+07	3.67853e+07				64.01		64.84	74.93		68.96		66.55	69.4				1.21143e-06		8.36643e-07	8.19483e-08		3.43055e-07		5.64339e-07	4.59261e-07				2		2	2		2
GQPLLLFR		O08651	D-3-phosphoglycerate dehydrogenase OS=Rattus norvegicus GN=Phgdh PE=1 SV=3 - [SERA_RAT]	943.573	0	0	0	3.53745e+07	0	26003092	0	0	43259906	0	0	0				35.45		37.69			36.36							0.000983601		0.000587245			0.000797662							2		2			2
VVNCAR	C4(Methylthio)	O08651	D-3-phosphoglycerate dehydrogenase OS=Rattus norvegicus GN=Phgdh PE=1 SV=3 - [SERA_RAT]	707.333	0	5.23905e+06	0	0	0	0	1.96377e+07	0	0	1.02652e+07	0	0		34.17					30.05			30.2				0.000727367					0.00182882			0.00176674				2					2
FGVEAFSDCLR	C9(Methylthio)	P29147	D-beta-hydroxybutyrate dehydrogenase, mitochondrial OS=Rattus norvegicus GN=Bdh1 PE=1 SV=2 - [BDH_RAT]	1289.56	0	0	3.16644e+07	1.85227e+07	0	0	3.24057e+07	4.39898e+06	2.58347e+07	0	1.5328e+07	2.05095e+07			73.98	61.73			61.05	57.11	69.69		63.4	70.88			5.7992e-08	9.4e-07			1.09933e-06	2.62624e-06	1.50359e-07		6.62778e-07	1.18404e-07			2	2			2	2	2
SFLPLLR		P29147	D-beta-hydroxybutyrate dehydrogenase, mitochondrial OS=Rattus norvegicus GN=Bdh1 PE=1 SV=2 - [BDH_RAT]	845.524	0	0	9.31585e+06	0	0	0	1.328e+07	0	1.42124e+07	0	0	0			33.26				33.38		33.36						0.000991332				0.000964316		0.000968767						2				2		2
TIQLNVCNSEEVEKAVETVR	C7(Methylthio)	P29147	D-beta-hydroxybutyrate dehydrogenase, mitochondrial OS=Rattus norvegicus GN=Bdh1 PE=1 SV=2 - [BDH_RAT]	2307.13	0	0	0	0	0	9.67816e+07	0	2.16164e+08	8.35691e+07	0	0	0						99.95		82.28	80.68									8.29495e-10		5.08743e-08	7.0543e-08									2		2	2
VSVVEPGNFIAATSLYSPER		P29147	D-beta-hydroxybutyrate dehydrogenase, mitochondrial OS=Rattus norvegicus GN=Bdh1 PE=1 SV=2 - [BDH_RAT]	2136.1	0	0	6.80174e+07	3.68789e+07	0	2.4715e+07	45567183	0	4.78868e+07	0	3.80067e+07	15912740			82.78	86.21		82.58	77.29		84.32		64.31	74.28			4.40237e-08	1.99842e-08		4.60985e-08	1.53043e-07		3.03259e-08		2.96545e-06	2.8367e-07			2	2		2	2		2
VVNISSMLGR		P29147	D-beta-hydroxybutyrate dehydrogenase, mitochondrial OS=Rattus norvegicus GN=Bdh1 PE=1 SV=2 - [BDH_RAT]	1075.59	0	0	69808924	6.43805e+07	3.31993e+07	33701545	63323478	0	46447827	34838054	6.16247e+07	4.79385e+07			73.14	74.69	83.17	81.81	78.98		78.8	75.09	75.47	75.81			1.86836e-07	1.32454e-07	1.8073e-08	3.19699e-08	4.74276e-08		5.1412e-08	1.50225e-07	1.06422e-07	1.02345e-07			2	2	2	2	2		2
LLEEHSR		P0C2X9	Delta-1-pyrroline-5-carboxylate dehydrogenase, mitochondrial OS=Rattus norvegicus GN=Aldh4a1 PE=1 SV=1 - [AL4A1_RAT]	883.463	0	9.04807e+06	0	1.56781e+07	0	0	0	0	0	2.27687e+07	1.75649e+07	0		43.71		48.25						47.99	45.29			0.000134064		4.71314e-05						5.00392e-05	9.31774e-05			2		2
STGSVVGQQPFGGAR		P0C2X9	Delta-1-pyrroline-5-carboxylate dehydrogenase, mitochondrial OS=Rattus norvegicus GN=Aldh4a1 PE=1 SV=1 - [AL4A1_RAT]	1447.73	0	18035733	0	5.21241e+07	0	49015129	0	0	8.17736e+07	48277480	5.30461e+07	0		73.55		52.18		69.49			63.68	82.91	95.34			2.40656e-07		3.75311e-05		6.24156e-07			2.31416e-06	3.42827e-08	1.75449e-09			2		2		2			2
VANEPILAFTQGSPERDALQK		P0C2X9	Delta-1-pyrroline-5-carboxylate dehydrogenase, mitochondrial OS=Rattus norvegicus GN=Aldh4a1 PE=1 SV=1 - [AL4A1_RAT]	2284.19	0	0	0	0	1.39147e+08	3.85707e+07	1.57388e+08	0	0	86128484	117151051	0			59.54		59.12	47.94	50.17		32.19	47.62	63.44				6.2257e-06		7.40893e-06	9.48095e-05	5.72159e-05		0.00359349	0.000105519	2.64945e-06				3		2	2	2		3
AKTNADTDGMVK		Q6P6R2	Dihydrolipoyl dehydrogenase, mitochondrial OS=Rattus norvegicus GN=Dld PE=1 SV=1 - [DLDH_RAT]	1250.6	0	5.80545e+06	0	0	0	0	0	0	0	3.30649e+07	0	1.8267e+07		69.11								58.02		72.39		5.4621e-07								6.94149e-06		2.56661e-07		2
GIEIPEVR		Q6P6R2	Dihydrolipoyl dehydrogenase, mitochondrial OS=Rattus norvegicus GN=Dld PE=1 SV=1 - [DLDH_RAT]	912.517	0	2.41277e+06	0	1.58473e+07	0	2.87473e+07	0	0	30132913	0	0	0		44.93		40.78		50.8			45.75					6.26664e-05		0.000142053		1.66353e-05			4.78931e-05					2		2		2			2
VCHAHPTLSEAFR	C2(Methylthio)	Q6P6R2	Dihydrolipoyl dehydrogenase, mitochondrial OS=Rattus norvegicus GN=Dld PE=1 SV=1 - [DLDH_RAT]	1513.7	0	0	0	1.23305e+08	149866060	6.78213e+07	0	0	1.374e+08	8.93159e+07	1.619e+08	1.25094e+08				45.87	52.49	50.04			53.87	50.93	52.15	48.26				8.5411e-05	1.86e-05	3.26975e-05			1.33316e-05	2.62351e-05	1.98099e-05	4.85158e-05				3	3	3			3
AAPAAAAAAPPGPR		P08461	Dihydrolipoyllysine-residue acetyltransferase component of pyruvate dehydrogenase complex, mitochondrial OS=Rattus norvegicus GN=Dlat PE=1 SV=3 - [ODP2_RAT]	1188.65	1.54509e+07	2.28335e+08	1.13767e+09	1082951158	1.63423e+09	1432901610	1630779518	3.82632e+07	1553835683	7.20577e+08	7.71178e+08	8.13011e+08	31.03	76.18	76.13	59.51	67.71	69.19	69.17	78.06	83.29	69.18	69.17	71.36	0.00437817	1.42184e-07	1.42612e-07	6.54871e-06	9.99659e-07	5.54317e-07	7.14253e-07	9.22257e-08	2.766e-08	7.1261e-07	7.14253e-07	3.36324e-07	2	2	2	2	2	2	2	2	2
DIDSFVPTK		P08461	Dihydrolipoyllysine-residue acetyltransferase component of pyruvate dehydrogenase complex, mitochondrial OS=Rattus norvegicus GN=Dlat PE=1 SV=3 - [ODP2_RAT]	1021.52	0	3.24981e+07	0	111899527	0	1.4775e+08	2.25125e+08	0	1.76008e+08	0	75295511	0		34.82		37.39		34.48	49.3		41.77		37.33			0.00159861		0.000884589		0.00172879	5.757e-05		0.000322657		0.000896895			2		2		2	2		2
GIDLTQVK		P08461	Dihydrolipoyllysine-residue acetyltransferase component of pyruvate dehydrogenase complex, mitochondrial OS=Rattus norvegicus GN=Dlat PE=1 SV=3 - [ODP2_RAT]	873.504	0	0	1.98642e+08	0	0	0	0	7.861e+06	3.59354e+08	0	0	0			33.36					34.58	36.89						0.00339068					0.00250803	0.00147344						2					2	2
GIDLTQVKGTGPEGR		P08461	Dihydrolipoyllysine-residue acetyltransferase component of pyruvate dehydrogenase complex, mitochondrial OS=Rattus norvegicus GN=Dlat PE=1 SV=3 - [ODP2_RAT]	1527.81	0	1.73452e+07	0	6.72021e+07	0	9.63368e+07	0	1.00158e+07	40145045	7.76252e+07	0	0		65.97		76.77		78.09		75.33	69.3	81.66	43.34			1.12554e-06		1.02033e-07		6.90812e-08		1.52406e-07	5.46327e-07	3.27523e-08	0.000240992			2		2		2		2	2
GLETIASDVVSLASK		P08461	Dihydrolipoyllysine-residue acetyltransferase component of pyruvate dehydrogenase complex, mitochondrial OS=Rattus norvegicus GN=Dlat PE=1 SV=3 - [ODP2_RAT]	1489.81	0	0	1.52088e+08	74705108	5.61506e+07	66232300	1.70767e+08	5.24916e+07	135419227	6.23005e+07	9.0321e+07	7.80807e+07			67	54.52	55.26	68.78	67.13	55.18	60.85	55.08	43.47	51.27			1.15725e-06	1.92485e-05	1.77222e-05	7.87983e-07	1.15217e-06	1.69898e-05	4.89234e-06	1.53676e-05	0.000251877	4.06815e-05			2	2	2	2	2	2	2
IIKKDIDSFVPTK		P08461	Dihydrolipoyllysine-residue acetyltransferase component of pyruvate dehydrogenase complex, mitochondrial OS=Rattus norvegicus GN=Dlat PE=1 SV=3 - [ODP2_RAT]	1503.88	9.66346e+07	0	601493816	0	0	67764614	1.02965e+08	0	193089823	2.30417e+08	0	0	49.52		66.21			64.39	53.11		60.8	57.55			2.0662e-05		5.02596e-07			7.2783e-07	9.77305e-06		2.24576e-06	3.25216e-06			3		3			3	3		3
ILVPEGTR		P08461	Dihydrolipoyllysine-residue acetyltransferase component of pyruvate dehydrogenase complex, mitochondrial OS=Rattus norvegicus GN=Dlat PE=1 SV=3 - [ODP2_RAT]	884.521	0	7.2541e+07	339088724	2.30768e+08	2.68919e+08	2.32219e+08	4.38537e+08	0	5.3202e+08	131875351	2.09536e+08	0		60.21	60.1	60.16	60.07	60.24	60.22		60.15	59.89	60.27			1.42919e-06	1.46586e-06	1.44574e-06	1.47602e-06	1.41936e-06	1.42591e-06		1.44908e-06	1.53848e-06	1.40958e-06			2	2	2	2	2	2		2
ILVPEGTRDVPLGTPLCIIVEK	C17(Methylthio)	P08461	Dihydrolipoyllysine-residue acetyltransferase component of pyruvate dehydrogenase complex, mitochondrial OS=Rattus norvegicus GN=Dlat PE=1 SV=3 - [ODP2_RAT]	2408.32	0	0	0	1.18419e+08	0	0	0	0	1.08679e+08	0	1.25153e+08	0				31.04					30.82		33.47					0.0026366					0.00277361		0.00166419					3					3
KDIDSFVPTK		P08461	Dihydrolipoyllysine-residue acetyltransferase component of pyruvate dehydrogenase complex, mitochondrial OS=Rattus norvegicus GN=Dlat PE=1 SV=3 - [ODP2_RAT]	1149.61	0	1.09457e+07	0	0	0	0	0	0	1.74249e+08	7.61762e+07	6.90695e+07	0		66.3							58.78	58.52	63.52			8.55644e-07							4.83385e-06	5.48359e-06	1.6896e-06			2							2
KLAAEKGIDLTQVK		P08461	Dihydrolipoyllysine-residue acetyltransferase component of pyruvate dehydrogenase complex, mitochondrial OS=Rattus norvegicus GN=Dlat PE=1 SV=3 - [ODP2_RAT]	1513.9	0	0	2.63601e+07	1.61517e+07	4.86524e+07	1.95649e+07	0	0	0	2.56908e+07	0	0			60.78	44.49	75.34	75.99				47.44					1.92189e-06	8.17952e-05	6.72555e-08	5.53889e-08				3.96664e-05					3	3	3	3
VAPTPAGVFIDIPISNIR		P08461	Dihydrolipoyllysine-residue acetyltransferase component of pyruvate dehydrogenase complex, mitochondrial OS=Rattus norvegicus GN=Dlat PE=1 SV=3 - [ODP2_RAT]	1880.07	0	0	4.36061e+08	3.38432e+08	0	1.63002e+08	4.95249e+08	0	3.9921e+08	1.88796e+08	3.246e+08	2.52958e+08			63.87	63.22		63.19	48.81		63.45	63.47	63.79	55.67			8.81939e-07	1.16726e-06		1.03143e-06	2.76197e-05		9.48897e-07	9.44538e-07	8.77444e-07	7.72405e-06			2	2		2	2		2
VAPTPAGVFIDIPISNIRR		P08461	Dihydrolipoyllysine-residue acetyltransferase component of pyruvate dehydrogenase complex, mitochondrial OS=Rattus norvegicus GN=Dlat PE=1 SV=3 - [ODP2_RAT]	2036.16	0	0	4.76002e+08	4.46412e+08	2.84265e+08	2.44325e+08	0	0	440745225	0	479178256	0			61.11	62.29	62.34	59.75			56.91		52.54				1.47148e-06	8.85302e-07	9.91857e-07	1.80073e-06			3.46297e-06		9.47216e-06				3	3	3	3			3
VFVSPLAK		P08461	Dihydrolipoyllysine-residue acetyltransferase component of pyruvate dehydrogenase complex, mitochondrial OS=Rattus norvegicus GN=Dlat PE=1 SV=3 - [ODP2_RAT]	860.523	0	1.95285e+08	943077920	8.37151e+08	872927341	6.97187e+08	422710135	2.96271e+07	7.7577e+08	4.67627e+08	492992727	5.26508e+08		43.61	45.76	41.9	45.77	45.78	45.66	45.02	45.01	45.61	45.78	43.49		9.79902e-05	3.45099e-05	0.000145272	6.3564e-05	6.34178e-05	6.38363e-05	7.08243e-05	4.10151e-05	6.18276e-05	5.94542e-05	0.000107451		2	2	2	2	2	2	2	2
VFVSPLAKK		P08461	Dihydrolipoyllysine-residue acetyltransferase component of pyruvate dehydrogenase complex, mitochondrial OS=Rattus norvegicus GN=Dlat PE=1 SV=3 - [ODP2_RAT]	988.619	0	6.20483e+06	29280125	2.2033e+07	45800344	4.71633e+06	0	0	0	0	1.62199e+07	11704883		42.5	35.09	34.4	45.54	46.71					52.34	34.33		5.61009e-05	0.000309008	0.000362218	2.78593e-05	2.12799e-05					5.82063e-06	0.000368104		2	2	2	2	2
VPLPSLSPTMQAGTIAR		P08461	Dihydrolipoyllysine-residue acetyltransferase component of pyruvate dehydrogenase complex, mitochondrial OS=Rattus norvegicus GN=Dlat PE=1 SV=3 - [ODP2_RAT]	1738.95	0	0	170097155	1.49981e+08	8.29682e+07	7.54452e+07	2.01846e+08	0	183954164	1.04662e+08	1.4945e+08	1.04868e+08			107.12	107.11	106.95	75.68	107.25		61.69	107.41	86.21	84.42			7.08423e-11	6.80876e-11	7.36704e-11	1.08158e-07	6.59277e-11		2.47339e-06	6.3543e-11	8.7356e-09	1.44564e-08			2	2	2	2	2		2
GLVVPVIR		Q01205	Dihydrolipoyllysine-residue succinyltransferase component of 2-oxoglutarate dehydrogenase complex, mitochondrial OS=Rattus norvegicus GN=Dlst PE=1 SV=2 - [ODO2_RAT]	852.567	0	8.35691e+06	261429526	0	0	0	3.1329e+08	6.07144e+06	2.74368e+08	153382332	2.07807e+08	0		47.18	46.18				48.1	64.28	57.46	50.7	50.98			1.90972e-05	2.4042e-05				1.54515e-05	3.72366e-07	1.79048e-06	8.49122e-06	7.96104e-06			2	2				2	2	2
LGFMSAFVK		Q01205	Dihydrolipoyllysine-residue succinyltransferase component of 2-oxoglutarate dehydrogenase complex, mitochondrial OS=Rattus norvegicus GN=Dlst PE=1 SV=2 - [ODO2_RAT]	999.532	0	0	6.96978e+07	4.56226e+07	2.24218e+07	2.07815e+07	5.17829e+07	0	4.36382e+07	3.45642e+07	2.15184e+07	41807178			66.4	54.75	69.23	57.73	57.98		63.43	58.31	69.15	33.13			6.18534e-07	1.05514e-05	3.76106e-07	4.30071e-06	4.29896e-06		1.15755e-06	4.05819e-06	3.83099e-07	0.0013133			2	2	2	2	2		2
LKEAQNTCAMLTTFNEVDMSNIQEMR	C8(Methylthio)	Q01205	Dihydrolipoyllysine-residue succinyltransferase component of 2-oxoglutarate dehydrogenase complex, mitochondrial OS=Rattus norvegicus GN=Dlst PE=1 SV=2 - [ODO2_RAT]	3063.37	0	0	0	0	7.56284e+07	0	9.81267e+07	2.53662e+08	0	5.18061e+07	0	1.18361e+08					36.36		71.64	87.8		42.33		51.87					0.000878585		2.60486e-07	6.38941e-09		0.000216372		2.53551e-05					3		3	3
NVETMNYADIER		Q01205	Dihydrolipoyllysine-residue succinyltransferase component of 2-oxoglutarate dehydrogenase complex, mitochondrial OS=Rattus norvegicus GN=Dlst PE=1 SV=2 - [ODO2_RAT]	1454.66	0	2.56451e+07	1.40332e+08	46290224	71167397	1.3775e+08	1.45806e+08	93780738	1.61902e+08	116800214	7.59906e+07	119797932		69.44	88.31	83.07	92.63	92.82	96.18	92.63	96.29	56.92	43.75	83.57		2.67342e-07	3.5417e-09	1.18362e-08	1.36439e-09	1.22763e-09	5.78377e-10	1.28253e-09	5.7566e-10	4.77604e-06	0.000107533	1.27467e-08		2	2	2	2	2	2	2	2
TINELGEKAR		Q01205	Dihydrolipoyllysine-residue succinyltransferase component of 2-oxoglutarate dehydrogenase complex, mitochondrial OS=Rattus norvegicus GN=Dlst PE=1 SV=2 - [ODO2_RAT]	1130.62	0	0	0	0	8.25535e+07	0	0	0	5.95144e+07	0	3.2459e+07	0					33.07				35.34	33.72	47.55						0.00263848				0.00168139	0.00244156	0.000101081						2				2
HQPPPIR		Q62950	Dihydropyrimidinase-related protein 1 OS=Rattus norvegicus GN=Crmp1 PE=1 SV=1 - [DPYL1_RAT]	844.479	0	0	0	1.02125e+07	0	0	0	0	0	1.11966e+07	0	6.67377e+06				36.43						36.47		36.28				0.0011603						0.00114966		0.00120108				2
IINDDQSFYADVYLEDGLIK		Q62950	Dihydropyrimidinase-related protein 1 OS=Rattus norvegicus GN=Crmp1 PE=1 SV=1 - [DPYL1_RAT]	2331.14	0	0	0	0	0	1.23155e+07	2.35587e+07	23276206	1.8976e+07	0	0	0						33.38	35.96	38.78	53.21									0.00321439	0.00163516	0.000867444	3.10394e-05									2	2	2	2
ILEMGITGPEGHALSRPEELEAEAVFR		Q62950	Dihydropyrimidinase-related protein 1 OS=Rattus norvegicus GN=Crmp1 PE=1 SV=1 - [DPYL1_RAT]	2951.48	0	0	0	0	0	2.78846e+07	34954221	6.39946e+06	0	0	0	0				47.36		42.37	34.82	34.3								0.000183654		0.000498309	0.00314777	0.00310232								3		3	3	3
KKGPLVFGEPIAASLGTDGTHYWSK		Q62950	Dihydropyrimidinase-related protein 1 OS=Rattus norvegicus GN=Crmp1 PE=1 SV=1 - [DPYL1_RAT]	2659.38	0	0	0	0	82199698	0	74337344	0	0	1.06652e+08	8.83768e+07	130064506			57.38		36.91		49.82			52.94	48.88	47.08			1.18827e-05		0.00125278		6.51448e-05			3.2014e-05	8.54169e-05	0.000121448			3		4		4
MVIPGGIDVNTYLQKPSQGMTSADDFFQGTR		Q62950	Dihydropyrimidinase-related protein 1 OS=Rattus norvegicus GN=Crmp1 PE=1 SV=1 - [DPYL1_RAT]	3373.62	0	0	0	2.88599e+08	0	1.80613e+08	0	0	2.59523e+08	0	0	3.3741e+08				31.61		41.47			34.16			34.56				0.00683337		0.000723546			0.003933			0.00344696				3		3			3
SAADIIALAR		Q62950	Dihydropyrimidinase-related protein 1 OS=Rattus norvegicus GN=Crmp1 PE=1 SV=1 - [DPYL1_RAT]	1000.58	1.75352e+07	0	0	0	0	6.69558e+07	1.24753e+08	0	0	32579005	6.08167e+07	0	57.48	31.54				58.77	61.51			64.66	60.53		1.25947e-05	0.0034722				6.5706e-06	3.49627e-06			1.7441e-06	4.38132e-06		2	2				2	2
SIPHITSDR		Q62950	Dihydropyrimidinase-related protein 1 OS=Rattus norvegicus GN=Crmp1 PE=1 SV=1 - [DPYL1_RAT]	1025.54	0	2.76698e+07	0	0	1.23797e+08	0	0	3.61608e+06	0	0	0	0		32.65			30.98			31.69						0.00179273			0.00263338			0.0022701						2			2			2
SSPSKHQPPPIR		Q62950	Dihydropyrimidinase-related protein 1 OS=Rattus norvegicus GN=Crmp1 PE=1 SV=1 - [DPYL1_RAT]	1330.72	0	0	0	4.31379e+06	1.85071e+08	6.67261e+06	0	0	4.90917e+06	1.04051e+08	0	6.40491e+07				58.34	59.54	55.99	41.48		50.89	50.31		57.72				5.34925e-06	4.05782e-06	9.44129e-06	0.000259593		3.01441e-05	3.39854e-05		6.17011e-06				2	2	2	3		2
AVGKDNFTLIPEGTNGTEER	N15(Deamidated)	P47942	Dihydropyrimidinase-related protein 2 OS=Rattus norvegicus GN=Dpysl2 PE=1 SV=1 - [DPYL2_RAT]	2149.04	0	0	6.94967e+07	67338722	4.299e+07	4.11345e+07	44320157	0	57726980	0	0	69377893			77.67	65.55	51.04	66.41	54.12		65.91	45.29		49.16			1.18846e-07	1.97815e-06	5.66673e-05	1.58849e-06	2.74953e-05		1.83361e-06	0.000211498		8.67573e-05			2	2	2	2	2		2
FQMPDQGMTSADDFFQGTK	M3(Oxidation)	P47942	Dihydropyrimidinase-related protein 2 OS=Rattus norvegicus GN=Dpysl2 PE=1 SV=1 - [DPYL2_RAT]	2166.9	0	0	9.59277e+07	3.11062e+07	9.14815e+07	9.60387e+07	0	0	3.75139e+07	3.73664e+07	3.53285e+07	3.46764e+07		62.89	85.18	81.63	73.51	60.94			40.08	60.88	68.02	39.84		8.99576e-07	5.6127e-09	1.27108e-08	8.02181e-08	1.53022e-06			0.000181623	1.51068e-06	3.15522e-07	0.000191943		2	2	2	2	2			2
FQMPDQGMTSADDFFQGTK		P47942	Dihydropyrimidinase-related protein 2 OS=Rattus norvegicus GN=Dpysl2 PE=1 SV=1 - [DPYL2_RAT]	2150.92	1.86767e+08	0	7.90573e+08	5.70215e+08	0	632305231	543544789	0	5.87825e+08	4.8096e+08	435200640	4.28572e+08	49.85	51.84	68.47	69.47	66.07	62.01	73.34		56.75	54.16	87.61	64.77	2.07028e-05	1.27654e-05	2.70242e-07	2.25959e-07	4.81986e-07	1.22754e-06	9.03721e-08		4.01563e-06	7.29044e-06	3.64099e-09	6.3351e-07	2	2	2	2	2	2	2		2
GLYDGPVCEVSVTPK	C8(Methylthio)	P47942	Dihydropyrimidinase-related protein 2 OS=Rattus norvegicus GN=Dpysl2 PE=1 SV=1 - [DPYL2_RAT]	1609.76	0	0	216509511	276550589	2.94807e+08	2.97845e+08	290928775	0	2.80493e+08	2.38874e+08	0	2.04444e+08			80.16	79.96	31.85	67.3	31.99		31.79	67.09		50.97			4.57819e-08	5.14719e-08	0.00306971	8.28629e-07	0.0032253		0.00344353	9.1854e-07		3.79921e-05			2	2	2	2	2		2
GSPLVVISQGK		P47942	Dihydropyrimidinase-related protein 2 OS=Rattus norvegicus GN=Dpysl2 PE=1 SV=1 - [DPYL2_RAT]	1084.64	0	1.95684e+07	167475062	0	6.8729e+07	0	0	0	1.58581e+08	0	0	9.0558e+07		38.92	45.39		45.84				46.85			34.75		0.000314171	7.08217e-05		7.68815e-05				5.06018e-05			0.000820665		2	2		2				2
ILDLGITGPEGHVLSRPEEVEAEAVNR		P47942	Dihydropyrimidinase-related protein 2 OS=Rattus norvegicus GN=Dpysl2 PE=1 SV=1 - [DPYL2_RAT]	2900.51	4.6065e+08	0	2709813119	1322294044	0	1.71998e+09	1204628693	95414755	1.48467e+09	1.02157e+09	865845652	1.47917e+09	46.17		39.88	32.97	47.27	35.32	48.26	40.1	48.67	42.08	44.32	43.37	0.000140097		0.00063223	0.00287657	0.000117187	0.00167446	8.80749e-05	0.000566798	7.8103e-05	0.000356179	0.000208953	0.000278455	3		3	3	2	3	3	3	3
ISVGSDADLVIWDPDSVK		P47942	Dihydropyrimidinase-related protein 2 OS=Rattus norvegicus GN=Dpysl2 PE=1 SV=1 - [DPYL2_RAT]	1915.96	0	0	3.19851e+07	0	3.8313e+07	97424486	0	100950415	6.79428e+07	0	0	4.02085e+07			30.92		32.18	38.43		38.55	46.48			35.57			0.00574458		0.00435845	0.00106944		0.000991422	0.000167555			0.00203839			2		2	2		2	2
IVLEDGTLHVTEGSGR		P47942	Dihydropyrimidinase-related protein 2 OS=Rattus norvegicus GN=Dpysl2 PE=1 SV=1 - [DPYL2_RAT]	1682.87	0	0	3.50265e+07	0	22910014	2.77466e+07	57448918	5.14611e+07	0	3.04386e+07	2.93464e+07	3.44624e+07			77.87		66.09	69.92	73.15	70.04	86.64	71.56	73.24	82.81			7.18543e-08		1.14407e-06	5.3476e-07	2.27561e-07	5.35049e-07	1.17056e-08	3.38643e-07	2.44235e-07	2.17294e-08			2		2	2	2	2	3
KGTVVYGEPITASLGTDGSHYWSK		P47942	Dihydropyrimidinase-related protein 2 OS=Rattus norvegicus GN=Dpysl2 PE=1 SV=1 - [DPYL2_RAT]	2553.26	0	0	7.56128e+07	0	0	0	3.0658e+07	0	0	3.80936e+07	5.00184e+07	45762992			47.85				78.42			84.25	108.9	104.64			0.000129607				1.22298e-07			3.2322e-08	1.10145e-10	2.6454e-10			3				3
KKGTVVYGEPITASLGTDGSHYWSK		P47942	Dihydropyrimidinase-related protein 2 OS=Rattus norvegicus GN=Dpysl2 PE=1 SV=1 - [DPYL2_RAT]	2681.36	2.07459e+07	0	802625978	4.36618e+08	4.5645e+08	5.73336e+07	439067560	0	387544600	1.42109e+08	4.70532e+08	558816413	50.22		86	82.05	73.75	56.61	87.95		66.63	78.98	80.14	79.16	8.1752e-05		2.21046e-08	5.39531e-08	3.73201e-07	1.89898e-05	1.35474e-08		1.83593e-06	1.08135e-07	8.18195e-08	1.01925e-07	3		3	3	3	3	3		3
KPFPDFVYK		P47942	Dihydropyrimidinase-related protein 2 OS=Rattus norvegicus GN=Dpysl2 PE=1 SV=1 - [DPYL2_RAT]	1140.61	0	0	4.21171e+07	0	1.97859e+07	0	0	0	4.55979e+07	0	0	0			31.25		42.04				36.02						0.00303707		0.000237566				0.000975135						2		2				2
MVIPGGIDVHTR	M1(Oxidation)	P47942	Dihydropyrimidinase-related protein 2 OS=Rattus norvegicus GN=Dpysl2 PE=1 SV=1 - [DPYL2_RAT]	1310.69	29122183	0	116620636	0	0	0	0	0	111588118	0	0	0	47.04	37.16	61.93			58.59			50.36			52.89	8.40212e-05	0.000865391	2.72514e-06			5.60344e-06			3.86589e-05			2.15898e-05	2	3	2			3			2
MVIPGGIDVHTR		P47942	Dihydropyrimidinase-related protein 2 OS=Rattus norvegicus GN=Dpysl2 PE=1 SV=1 - [DPYL2_RAT]	1294.69	3.73858e+08	0	2199504104	1683911381	0	7.93831e+08	1.59369e+09	0	2.1778e+09	8.60766e+08	1.83957e+09	1.3259e+09	61.38	61.23	79.57	70.55	66.67	74.1	74.29	62.65	74.11	72.67	73.74	73.16	3.93001e-06	4.06812e-06	5.96202e-08	5.33035e-07	1.1625e-06	2.10084e-07	2.15987e-07	2.93355e-06	2.09601e-07	2.92007e-07	1.96541e-07	2.24622e-07	2	3	2	2	3	2	2	3	2
NLHQSGFSLSGAQIDDNIPR		P47942	Dihydropyrimidinase-related protein 2 OS=Rattus norvegicus GN=Dpysl2 PE=1 SV=1 - [DPYL2_RAT]	2169.07	0	0	0	192941245	3.77402e+08	2.06531e+08	0	3.95008e+08	0	2.08372e+08	9.4811e+07	3.07231e+08			76.91	85.19	102.97	94.95	75.71	94.23	89.45	82.15	104.86	81.39			1.15093e-07	1.75561e-08	3.5074e-10	1.95133e-09	1.61121e-07	2.35983e-09	6.92357e-09	3.6877e-08	2.04117e-10	4.8286e-08			2	3	3	3	2	3	2
NLHQSGFSLSGAQIDDNIPRR		P47942	Dihydropyrimidinase-related protein 2 OS=Rattus norvegicus GN=Dpysl2 PE=1 SV=1 - [DPYL2_RAT]	2325.17	0	0	0	6.206e+07	0	0	0	96481070	7.45149e+07	0	6.86501e+07	0			57.97	32.39	61.59	36.51		45.14	49.14		46.08	52.73			1.30064e-05	0.00490251	6.24083e-06	0.00195438		0.000263329	9.63002e-05		0.000209613	4.61335e-05			4	3	4	3		3	3
SAAEVIAQAR		P47942	Dihydropyrimidinase-related protein 2 OS=Rattus norvegicus GN=Dpysl2 PE=1 SV=1 - [DPYL2_RAT]	1015.55	0	1.74062e+08	799344149	3.56486e+08	560832109	4.29601e+08	443926287	7.15389e+07	557120516	2.59036e+08	238833566	3.65399e+08		43.57	60.59	57.03	60.78	58.42	61.11	53.61	48.37	56.59	60.82	56.34		0.000186805	3.79743e-06	8.02518e-06	3.42597e-06	6.11489e-06	3.29146e-06	1.85093e-05	6.1857e-05	8.88086e-06	3.51875e-06	9.87163e-06		2	2	2	2	2	2	2	2
SITIANQTNCPLYVTK	C10(Methylthio)	P47942	Dihydropyrimidinase-related protein 2 OS=Rattus norvegicus GN=Dpysl2 PE=1 SV=1 - [DPYL2_RAT]	1811.9	0	0	6.01104e+08	0	497679643	3.07731e+08	362884300	104374147	3.40764e+08	4.12719e+08	3.74435e+08	430244191		41.43	38.29		38.44	30.84	48.65	38.33	34.76	48.59	43.71	38.37		0.000478434	0.000956224		0.000995371	0.00548052	9.07448e-05	0.000976836	0.00217227	9.20072e-05	0.000283023	0.00080778		2	2		2	2	2	2	2
THNSALEYNIFEGMECR	C16(Methylthio)	P47942	Dihydropyrimidinase-related protein 2 OS=Rattus norvegicus GN=Dpysl2 PE=1 SV=1 - [DPYL2_RAT]	2059.87	0	0	0	0	3.02817e+07	0	4.02947e+07	6.04287e+07	0	0	0	0			50.05	44.53	42.67		50.79	60.11							1.38397e-05	4.93319e-05	7.84094e-05		1.16715e-05	1.36499e-06							2	2	3		3	3
TSPAKQQAPPVR		P47942	Dihydropyrimidinase-related protein 2 OS=Rattus norvegicus GN=Dpysl2 PE=1 SV=1 - [DPYL2_RAT]	1279.71	0	3.19812e+07	0	0	2.17372e+08	1.73493e+08	1.04348e+08	0	1.69384e+08	9.79421e+07	0	0	53.98	73.65	61.17	60.99	77.55	68.18	77.45		77.74	75.06	60.51	61.02	1.07985e-05	1.1651e-07	2.06236e-06	2.14963e-06	4.74639e-08	4.10548e-07	4.85695e-08		4.54322e-08	8.421e-08	2.40084e-06	2.13483e-06	3	2	3	3	2	2	2		2
VFNLYPR		P47942	Dihydropyrimidinase-related protein 2 OS=Rattus norvegicus GN=Dpysl2 PE=1 SV=1 - [DPYL2_RAT]	908.499	1.18706e+08	1.5789e+07	5.4827e+08	6.49185e+08	4.30351e+08	4.32079e+08	7.70027e+08	2.49654e+07	636564614	4.30801e+08	602871811	4.71253e+08	35.72	39.89	39.85	41.64	38.34	41.63	41.64	38.37	41.7	39.92	41.58	39.94	0.000669792	0.000256413	0.000263961	0.000171372	0.000381042	0.000168332	0.000174799	0.000363865	0.000169021	0.000249555	0.000218933	0.000248408	2	2	2	2	2	2	2	2	2
GMYDGPVFDLTTTPK		Q62952	Dihydropyrimidinase-related protein 3 OS=Rattus norvegicus GN=Dpysl3 PE=1 SV=2 - [DPYL3_RAT]	1641.78	0	0	8.0944e+07	8.45103e+07	0	60532651	0	0	9.95788e+07	5.04238e+07	63703264	0			67.06	67.19		36.75			66.75	59.61	67.12				1.08234e-06	9.74025e-07		0.00113072			1.08845e-06	6.07146e-06	1.05778e-06				2	2		2			2
KMADLHAVPR		Q62952	Dihydropyrimidinase-related protein 3 OS=Rattus norvegicus GN=Dpysl3 PE=1 SV=2 - [DPYL3_RAT]	1137.62	0	0	0	3.12911e+07	3.74335e+07	2.30544e+07	27243390	0	4.08248e+07	0	2.25138e+07	2.43943e+07				54.51	54.57	46.31	50.06		43.73		48.44	51.28				1.73459e-05	1.76316e-05	0.000114603	4.83277e-05		0.000173694		4.86944e-05	3.72366e-05				3	3	3	3		3
LLIKGGR		Q62952	Dihydropyrimidinase-related protein 3 OS=Rattus norvegicus GN=Dpysl3 PE=1 SV=2 - [DPYL3_RAT]	756.509	0	0	0	0	0	8.27304e+06	0	0	0	8.62986e+06	1.2518e+07	0				35.86		35.97				35.23	40.08					0.000518836		0.00050586				0.000599833	0.00019635					2		2
MLEMGITGPEGHVLSRPEELEAEAVFR		Q62952	Dihydropyrimidinase-related protein 3 OS=Rattus norvegicus GN=Dpysl3 PE=1 SV=2 - [DPYL3_RAT]	2997.48	0	0	0	54813977	0	0	47661896	0	5.85688e+07	0	46759464	5.25041e+07			41.84	45.57			30.71		48.84		35.02	40.84			0.00064809	0.000273172			0.00815213		0.000129964		0.00299036	0.000832379			3	3			3		3
NLHQSGFSLSGTQVDEGVR		Q62952	Dihydropyrimidinase-related protein 3 OS=Rattus norvegicus GN=Dpysl3 PE=1 SV=2 - [DPYL3_RAT]	2030.99	0	0	0	2.69795e+07	0	0	5.72221e+07	9.66485e+07	0	0	41558969	5.24221e+07				53.6			51.27	78.89		67.69	32.41	60.55				2.55362e-05			4.29208e-05	7.61819e-08		1.0213e-06	0.0034734	5.06603e-06				3			3	3
GLYDGPVHEVMLPAKPGSGTQAR		Q62951	Dihydropyrimidinase-related protein 4 (Fragment) OS=Rattus norvegicus GN=Dpysl4 PE=1 SV=1 - [DPYL4_RAT]	2380.21	0	0	0	9.43846e+07	0	0	7.84551e+07	0	108824611	0	0	0				31.99			32.92		37.89							0.00531226			0.00416062		0.00134108							3			3		3
IFNFYPR		Q62951	Dihydropyrimidinase-related protein 4 (Fragment) OS=Rattus norvegicus GN=Dpysl4 PE=1 SV=1 - [DPYL4_RAT]	956.497	0	0	0	0	0	0	1.53186e+07	0	1.92992e+07	0	8729616	0							32.49		31.12		34.31								0.00124		0.0016999		0.000630157								2		2
IMAPPGGR		Q62951	Dihydropyrimidinase-related protein 4 (Fragment) OS=Rattus norvegicus GN=Dpysl4 PE=1 SV=1 - [DPYL4_RAT]	798.429	0	0	0	0	0	4.26547e+07	3.94642e+07	0	4.27997e+07	23417808	3.07109e+07	2.80156e+07						37.17	34.22		38.89	41.54	30.75	37.62						0.000249427	0.000491975		0.000167859	9.11892e-05	0.00109381	0.000224876						2	2		2
KTFPDFVYKR		Q62951	Dihydropyrimidinase-related protein 4 (Fragment) OS=Rattus norvegicus GN=Dpysl4 PE=1 SV=1 - [DPYL4_RAT]	1300.7	0	0	0	2.44344e+07	0	0	1.62526e+07	0	3.20109e+07	1.73527e+07	0	0				44.94			43.57		47.05	42.61						0.000190773			0.000195596		0.000117359	0.000271397						3			3		3
LLEQGITGPEGHVLSHPEEVEAEAVYR		Q62951	Dihydropyrimidinase-related protein 4 (Fragment) OS=Rattus norvegicus GN=Dpysl4 PE=1 SV=1 - [DPYL4_RAT]	2959.5	0	0	57615910	0	29970945	4.07467e+07	0	0	0	0	0	0			61.94		58.09	54.16				52.71					4.92596e-06		1.25743e-05	3.08884e-05				4.98291e-05					3		3	3
LQMPVLGMTPADDFCQGTK	C15(Methylthio)	Q62951	Dihydropyrimidinase-related protein 4 (Fragment) OS=Rattus norvegicus GN=Dpysl4 PE=1 SV=1 - [DPYL4_RAT]	2097.95	0	0	35688432	0	3.45907e+07	3.08497e+07	4.07115e+07	0	45937702	2.55401e+07	4.18486e+07	2.93938e+07			60.35		65.03	54.08	30.21		53.35	32.15	67.21	50.44			3.92093e-06		1.30331e-06	1.70016e-05	0.00414466		1.87264e-05	0.00262101	8.93507e-07	3.84051e-05			2		2	2	2		2
NLHQSGFSLSGSQADDHIAR		Q62951	Dihydropyrimidinase-related protein 4 (Fragment) OS=Rattus norvegicus GN=Dpysl4 PE=1 SV=1 - [DPYL4_RAT]	2140.01	0	0	0	2.76605e+07	0	0	0	43877311	33684174	0	0	0				75.14				86.71	42.25							2.37302e-07				1.48247e-08	0.000333571							3				3	3
TIDAHGLMVLPGGVDVHTR		Q62951	Dihydropyrimidinase-related protein 4 (Fragment) OS=Rattus norvegicus GN=Dpysl4 PE=1 SV=1 - [DPYL4_RAT]	1988.04	0	0	190841297	0	0	0	1.24125e+08	1.82884e+07	0	1.03419e+08	1.31487e+08	9.86909e+07			70.53				64.73	61.46		39.74	70.09	72.94			6.77113e-07				2.38923e-06	5.0372e-06		0.000753804	6.9054e-07	3.76038e-07			3				3	3
LLGPDAAINLADPDGALAK		Q6AYH5	Dynactin subunit 2 OS=Rattus norvegicus GN=Dctn2 PE=1 SV=1 - [DCTN2_RAT]	1834.99	0	0	54086360	41887168	32343562	0	5.95378e+07	0	6.62451e+07	2.70669e+07	1.70287e+07	0			47.94	47.73	39.25		50.1		43.92	44.92	44.03				8.51679e-05	8.09545e-05	0.000570481		5.1305e-05		0.000210864	0.00015139	0.000191753				2	2	2		2		2
LLGPDAAINLADPDGALAKR		Q6AYH5	Dynactin subunit 2 OS=Rattus norvegicus GN=Dctn2 PE=1 SV=1 - [DCTN2_RAT]	1991.09	0	0	1.28998e+08	0	1.55322e+08	1.09172e+08	139585974	0	0	0	0	0			56.28		64.3	61.38	41.44								1.01267e-05		1.50472e-06	3.02029e-06	0.000297885								3		3	3	3
LLHEVQELTTEVEKIK		Q6AYH5	Dynactin subunit 2 OS=Rattus norvegicus GN=Dctn2 PE=1 SV=1 - [DCTN2_RAT]	1909.06	0	0	4.27519e+07	27227672	4.66277e+07	2.72827e+07	3.71897e+07	5.10398e+07	0	22853901	24637469	1.07358e+07			57.35	50.76	54.37	55.07	63	61		45.55	56.78	39.95			6.81086e-06	2.35049e-05	1.00539e-05	7.77929e-06	1.67898e-06	2.54185e-06		7.66183e-05	4.72261e-06	0.000207374			3	3	3	3	3	3
LLLQLEATK		Q6AYH5	Dynactin subunit 2 OS=Rattus norvegicus GN=Dctn2 PE=1 SV=1 - [DCTN2_RAT]	1028.63	8.36744e+06	0	0	0	0	0	0	4.15956e+06	0	2.55792e+07	0	0	41.04							46.71		41			0.000220373							5.97253e-05		0.000222412			2							2
VNALDLAVLDQVEAR		Q6AYH5	Dynactin subunit 2 OS=Rattus norvegicus GN=Dctn2 PE=1 SV=1 - [DCTN2_RAT]	1625.89	0	0	0	3.52835e+07	0	38071881	0	0	4.97497e+07	0	0	0				79.88		80.81			92.23							3.75226e-08		3.07045e-08			2.63301e-09							2		2			2
WSPVASTLPELVQR		Q6AYH5	Dynactin subunit 2 OS=Rattus norvegicus GN=Dctn2 PE=1 SV=1 - [DCTN2_RAT]	1582.86	0	0	5.91731e+07	5.38505e+07	3.56743e+07	4.62191e+07	6.00884e+07	0	5.18928e+07	34654505	29494594	0			54.06	64.82	59.47	77.86	50.67		58.25	64.85	71.77				1.60984e-05	1.38436e-06	5.08408e-06	7.69304e-08	3.81382e-05		6.80787e-06	1.4894e-06	2.99373e-07				2	2	2	2	2		2
YADLPGIAR		Q6AYH5	Dynactin subunit 2 OS=Rattus norvegicus GN=Dctn2 PE=1 SV=1 - [DCTN2_RAT]	975.525	0	7.87583e+06	0	6.03086e+07	61127260	0	64301494	0	79526388	3.73826e+07	4.78163e+07	0		41.26		61.61	57.73		41.85		51.76	61.06	42.89			0.000314231		2.89901e-06	6.91487e-06		0.000365753		2.80059e-05	3.79963e-06	0.000249311			2		2	2		2		2
CVDMVVSELTSTIR	C1(Methylthio)	P21575	Dynamin-1 OS=Rattus norvegicus GN=Dnm1 PE=1 SV=2 - [DYN1_RAT]	1598.76	0	0	0	19153737	1.55084e+07	1.1184e+07	31505608	4.01126e+07	0	0	0	0				66.28	47.06	84.17	76.19	95.85								9.18469e-07	7.67476e-05	1.81842e-08	1.06994e-07	1.01406e-09								2	2	2	2	2
EVDPQGQR		P21575	Dynamin-1 OS=Rattus norvegicus GN=Dnm1 PE=1 SV=2 - [DYN1_RAT]	928.448	0	0	0	3.78426e+06	0	0	0	0	0	4.30449e+06	6.2862e+06	1.17029e+06				31.39						30.99	34.77	32.91				0.00112546						0.00123405	0.000516811	0.000793107				2
GISPVPINLR		P21575	Dynamin-1 OS=Rattus norvegicus GN=Dnm1 PE=1 SV=2 - [DYN1_RAT]	1065.64	0	0	0	1.86417e+08	95953499	1.48221e+08	0	0	0	0	207036007	0				56.81	56.75	55.66			60.16		60.66					2.39716e-06	2.53619e-06	2.98808e-06			1.1084e-06		9.87866e-07					2	2	2			2
GMEDLIPLVNR		P21575	Dynamin-1 OS=Rattus norvegicus GN=Dnm1 PE=1 SV=2 - [DYN1_RAT]	1256.67	0	0	97332988	241905170	9.8051e+07	167795340	4.05248e+08	0	4.41581e+08	0	1.87752e+08	107183142			43.43	39.12	41.57	41.04	45.77		36.99		42.63	42.76			0.000167958	0.00049597	0.000282134	0.000318754	0.000107264		0.000669954		0.000221032	0.000214514			2	2	2	2	2		2
GYIGVVNR		P21575	Dynamin-1 OS=Rattus norvegicus GN=Dnm1 PE=1 SV=2 - [DYN1_RAT]	877.489	0	5.50445e+07	3.41343e+08	0	126458750	158890560	1.22001e+08	1.08845e+07	1.28815e+08	0	1.3274e+08	0		51.01	44.16		42.54	38.81	34.82	30.23	33.83		33.43			2.536e-05	0.000122786		0.000178299	0.000420872	0.00105475	0.00303494	0.0013248		0.00145261			2	2		2	2	2	2	2
HIFALFNTEQR		P21575	Dynamin-1 OS=Rattus norvegicus GN=Dnm1 PE=1 SV=2 - [DYN1_RAT]	1375.71	0	0	153828508	3.90959e+07	0	0	0	3.79953e+07	5.91575e+07	6.23464e+07	0	0			42.49	32.42				44.5	47.68	57.54					0.000335364	0.00326494				0.000202244	0.00011772	9.95516e-06					2	2				2	2
IAKEVDPQGQR		P21575	Dynamin-1 OS=Rattus norvegicus GN=Dnm1 PE=1 SV=2 - [DYN1_RAT]	1240.66	0	2.04635e+07	0	0	8.45052e+07	1.29711e+08	6.50032e+07	0	1.79659e+08	7.5096e+07	5.89679e+07	0		55.57			40.1	39.78	45.47		59.17	56.08	55.74			7.90396e-06			0.000288285	0.000310329	8.08807e-05		3.4502e-06	7.02821e-06	7.60055e-06			2			2	2	2		2
IVTTHIR		P21575	Dynamin-1 OS=Rattus norvegicus GN=Dnm1 PE=1 SV=2 - [DYN1_RAT]	839.51	0	0	6.11529e+07	67995416	0	0	8.51796e+07	1.61733e+06	0	3.86103e+07	7.98801e+07	0			31.46	46.17			46.43	51.75		46.62	47.82				0.000857396	2.89855e-05			2.73012e-05	8.02013e-06		2.61325e-05	1.98235e-05				2	2			2	2
KFFLSHPSYR		P21575	Dynamin-1 OS=Rattus norvegicus GN=Dnm1 PE=1 SV=2 - [DYN1_RAT]	1281.67	0	0	1.97508e+08	0	0	35665474	2.8712e+08	0	0	4.76136e+07	2.91164e+08	2.65987e+08			55.16	55.78	50.35	68.42	62.94		47.85	67.95	57.33	67.91			1.18868e-05	9.24843e-06	3.64416e-05	5.61131e-07	1.85478e-06		6.48033e-05	6.25266e-07	7.21215e-06	6.31051e-07			2	3	3	2	2		3
LKEPSIK		P21575	Dynamin-1 OS=Rattus norvegicus GN=Dnm1 PE=1 SV=2 - [DYN1_RAT]	814.503	0	3.23612e+06	0	0	0	9.09691e+06	31748837	0	0	0	0	6.31559e+06		46.26				39.79	46.27					39.56		5.55991e-05				0.000246642	5.54712e-05					0.000260057		2				2	2
MGTPYLQK		P21575	Dynamin-1 OS=Rattus norvegicus GN=Dnm1 PE=1 SV=2 - [DYN1_RAT]	937.481	0	0	0	96874218	6.85054e+07	0	1.89467e+08	0	143455894	0	0	0				35.04	36.22		30.78		31.53							0.000783321	0.000608892		0.00208901		0.00175768							2	2		2		2
RGYIGVVNR		P21575	Dynamin-1 OS=Rattus norvegicus GN=Dnm1 PE=1 SV=2 - [DYN1_RAT]	1033.59	3.81174e+07	0	219368326	0	0	0	0	0	6.86684e+07	0	0	0	38.62		34.06						31.21				0.000425953		0.00100124						0.0022705				2		2						2
RPLVLQLVNSTTEYAEFLHCK	C20(Methylthio)	P21575	Dynamin-1 OS=Rattus norvegicus GN=Dnm1 PE=1 SV=2 - [DYN1_RAT]	2507.28	0	0	2.3381e+07	3.67771e+07	3.00194e+07	0	4.90651e+07	0	4.0297e+07	0	8.65937e+07	1.08386e+08			33.34	81.12	70.85		78.56		59.47		68.04	83.98			0.00363806	6.18144e-08	6.04348e-07		1.03094e-07		8.64294e-06		1.15422e-06	2.93959e-08			3	3	3		3		3
RSPTSSPTPQR		P21575	Dynamin-1 OS=Rattus norvegicus GN=Dnm1 PE=1 SV=2 - [DYN1_RAT]	1213.63	2.24199e+06	731554	5.67791e+06	0	2.72789e+06	9.66231e+07	9.62114e+07	0	3.99305e+06	9.57891e+07	0	2.24728e+06	41.52	67.6	68.24		67.8	69.55	69.59		67.92	69.86		53.85	0.00026426	6.51675e-07	5.62382e-07		6.22345e-07	4.15941e-07	4.12127e-07		6.05384e-07	3.87286e-07		1.54537e-05	2	2	2		2	2	2		2
SPTSSPTPQR		P21575	Dynamin-1 OS=Rattus norvegicus GN=Dnm1 PE=1 SV=2 - [DYN1_RAT]	1057.53	0	0	0	8.90874e+06	0	0	2.0498e+07	0	0	1.20408e+07	8.3234e+06	5.98726e+06				47.68			43.98			43.95	55.7	46.73				3.75338e-05			9.59867e-05			8.85977e-05	5.92138e-06	4.67114e-05				2			2
SQKDIDGKKDITAALAAER		P21575	Dynamin-1 OS=Rattus norvegicus GN=Dnm1 PE=1 SV=2 - [DYN1_RAT]	2030.08	0	0	0	2.22909e+07	2.36316e+08	0	0	0	2.40272e+08	1.78628e+07	142569772	144204212	32.3			69.53	96.58				83.6	89.48	89	115.43	0.00347418			5.90576e-07	1.1319e-09				2.40084e-08	6.65046e-09	7.04998e-09	1.56098e-11	4			2	2				2
TGLFTPDLAFEATVK		P21575	Dynamin-1 OS=Rattus norvegicus GN=Dnm1 PE=1 SV=2 - [DYN1_RAT]	1609.85	0	0	0	5.44527e+07	0	3.82402e+07	8.47529e+07	0	7.00953e+07	0	2.36081e+07	0				49.61		43.11	49.91		37.48		55.1					5.57918e-05		0.00021745	5.0026e-05		0.000794987		1.45244e-05					2		2	2		2
TGLFTPDLAFEATVKK		P21575	Dynamin-1 OS=Rattus norvegicus GN=Dnm1 PE=1 SV=2 - [DYN1_RAT]	1737.94	0	0	0	0	12266531	0	0	0	3.62248e+07	0	0	1.74013e+07			49.77		40.34				48.54	49.7		57.02			4.21755e-05		0.000406867				5.45839e-05	4.76826e-05		7.94438e-06			3		2				2
VLNQQLTNHIRDTLPGLR		P21575	Dynamin-1 OS=Rattus norvegicus GN=Dnm1 PE=1 SV=2 - [DYN1_RAT]	2088.16	0	0	0	7.06556e+08	409524252	0	640241191	3.44226e+07	0	4.26142e+08	372759536	5.60658e+08			45.14	46.01	54.88		47.51	37.35	42.63	47.61	43.3	46.89			0.000114824	7.01711e-05	1.1053e-05		4.79031e-05	0.000607455	0.000177371	5.72155e-05	0.000128627	5.5254e-05			2	3	3		3	3	2
VYSPHVLNLTLVDLPGMTK		P21575	Dynamin-1 OS=Rattus norvegicus GN=Dnm1 PE=1 SV=2 - [DYN1_RAT]	2097.14	0	0	0	0	0	0	70739148	0	50831783	2.4572e+07	0	0							62.07		51.44	56.35									3.13539e-06		3.91198e-05	1.17028e-05									3		3
YMLSVDNLK		P21575	Dynamin-1 OS=Rattus norvegicus GN=Dnm1 PE=1 SV=2 - [DYN1_RAT]	1082.56	0	0	1.92079e+07	2.02541e+07	0	0	2.06486e+07	0	0	0	0	0			36.62	44.22			39.96								0.000816641	0.000115425			0.000358285								2	2			2
AKNEILDEVISLSQVTPK		Q2TA68	Dynamin-like 120 kDa protein, mitochondrial OS=Rattus norvegicus GN=Opa1 PE=1 SV=1 - [OPA1_RAT]	1984.09	0	0	1.1158e+08	0	55060325	3.81872e+07	1.34435e+08	0	1.03876e+08	2.90023e+07	3.89127e+07	5.29551e+07			53.37	33.95	71.08	32.33	53.92	41.44	45.93	51.72	61.56	50.69			1.91006e-05	0.00193304	3.00235e-07	0.00254384	1.98699e-05	0.000319418	0.000107213	3.29759e-05	2.68819e-06	4.18019e-05			2	3	2	2	2	3	2
AYMQNPNAIILCIQDGSVDAER	C12(Methylthio)	Q2TA68	Dynamin-like 120 kDa protein, mitochondrial OS=Rattus norvegicus GN=Opa1 PE=1 SV=1 - [OPA1_RAT]	2467.15	0	0	0	1.19579e+07	0	0	17753350	1.34314e+07	1.8737e+07	0	0	1.11844e+07				72.97			46.31	79.44	67.93			63.92				2.85134e-07			0.000130975	6.48448e-08	9.18068e-07			2.12892e-06				2			2	2	2
FNLETEWKNNYPR		Q2TA68	Dynamin-like 120 kDa protein, mitochondrial OS=Rattus norvegicus GN=Opa1 PE=1 SV=1 - [OPA1_RAT]	1710.82	0	0	4.65947e+07	0	3.34895e+07	0	0	0	28112629	2.24143e+07	0	0			56.88		48.41				52.58	54.3	72.94	74.51			9.74302e-06		7.28268e-05				2.98122e-05	2.00629e-05	2.74406e-07	1.68149e-07			3		3				3
GVEVDPSLIKDTWHQVYRR		Q2TA68	Dynamin-like 120 kDa protein, mitochondrial OS=Rattus norvegicus GN=Opa1 PE=1 SV=1 - [OPA1_RAT]	2298.19	0	0	0	3.67227e+07	0	0	0	0	2.50943e+07	0	3.07417e+07	2.68279e+07				39.19					31.21		31.86	39.27				0.000855576					0.00533567		0.00462656	0.000875451				3					3
HKWNDFAEDSLR		Q2TA68	Dynamin-like 120 kDa protein, mitochondrial OS=Rattus norvegicus GN=Opa1 PE=1 SV=1 - [OPA1_RAT]	1517.71	0	0	8.99333e+07	5.11559e+07	0	0	0	0	0	5.85525e+07	0	0			65.63	76.13			38.48			62.32					1.10778e-06	9.0199e-08			0.000525051			2.1394e-06					2	2			3
HWEEILQQSLWER		Q2TA68	Dynamin-like 120 kDa protein, mitochondrial OS=Rattus norvegicus GN=Opa1 PE=1 SV=1 - [OPA1_RAT]	1753.86	0	0	20912954	1.79475e+07	0	0	2.8121e+07	0	3.11264e+07	0	0	4.34997e+07			59.69	51.3			42.7	62.71	39.14			66.82			7.35683e-06	4.96678e-05			0.000394718	3.93811e-06	0.000889862			1.50778e-06			2	2			2	3	2
IDQLQEELLHTQLK		Q2TA68	Dynamin-like 120 kDa protein, mitochondrial OS=Rattus norvegicus GN=Opa1 PE=1 SV=1 - [OPA1_RAT]	1707.93	0	0	0	0	0	0	4.64438e+07	0	3.34679e+07	0	12919057	0							73.81		56.63		43.39								1.55966e-07		9.66852e-06		0.000171803								3		3
KLVLQKDDKGIHHR		Q2TA68	Dynamin-like 120 kDa protein, mitochondrial OS=Rattus norvegicus GN=Opa1 PE=1 SV=1 - [OPA1_RAT]	1686.98	0	0	0	2.45115e+07	0	0	2.1826e+07	0	0	0	5.37486e+07	3.53922e+07				69.89			52.12				79.73	65.9				2.25643e-07			1.38096e-05				2.44753e-08	5.78339e-07				3			3
KVSDKEKIDQLQEELLHTQLK		Q2TA68	Dynamin-like 120 kDa protein, mitochondrial OS=Rattus norvegicus GN=Opa1 PE=1 SV=1 - [OPA1_RAT]	2522.38	0	0	86421918	0	0	2.96914e+07	0	0	0	5.27585e+07	7.1663e+07	0			45.26			50.06				66.43	40.64				0.000107227			3.20541e-05				6.93905e-07	0.000293413				3			3
LDAFIEALHQEK		Q2TA68	Dynamin-like 120 kDa protein, mitochondrial OS=Rattus norvegicus GN=Opa1 PE=1 SV=1 - [OPA1_RAT]	1413.74	0	0	52468411	7.32105e+07	44864471	4.72937e+07	0	0	3.1775e+07	4.97789e+07	6.63415e+07	0			36.06	33.03	37.04	36.5			32.96	40.43	32.29				0.00109007	0.00186651	0.000771018	0.000873101			0.00197272	0.000398522	0.00227227				2	2	2	2			2
LKDTENAIENMIGPDWK		Q2TA68	Dynamin-like 120 kDa protein, mitochondrial OS=Rattus norvegicus GN=Opa1 PE=1 SV=1 - [OPA1_RAT]	1973.96	0	0	0	0	5.03821e+07	0	0	0	0	0	35993789	42016314			36.2		32.21					43.95	52.51	60.43			0.00146329		0.00375734					0.00026378	3.4785e-05	5.47968e-06			3		2
MLKVNDEHPAYLASDEITTVRK		Q2TA68	Dynamin-like 120 kDa protein, mitochondrial OS=Rattus norvegicus GN=Opa1 PE=1 SV=1 - [OPA1_RAT]	2530.28	0	0	0	2.68125e+07	4.69881e+07	12227261	0	8.30798e+07	0	0	0	4.09773e+07				37.36	42.52	51.34	39.02	50.33				39.17				0.00155187	0.000470196	6.35354e-05	0.00106517	7.87805e-05				0.00102901				3	3	3	4	3
NLSLAVSDCFWK	C9(Methylthio)	Q2TA68	Dynamin-like 120 kDa protein, mitochondrial OS=Rattus norvegicus GN=Opa1 PE=1 SV=1 - [OPA1_RAT]	1428.67	0	0	0	0	0	0	0	0	1.03832e+07	0	8216932	1.64294e+07									34.11		37.39	34.14									0.0010286		0.00051981	0.00102152									2
NRTQEQCVHNETKNELEK	C7(Methylthio)	Q2TA68	Dynamin-like 120 kDa protein, mitochondrial OS=Rattus norvegicus GN=Opa1 PE=1 SV=1 - [OPA1_RAT]	2246.03	0	0	3.32595e+07	6.78094e+07	2.60499e+07	1.74684e+07	0	3.85816e+07	76037988	6.27402e+07	0	2.6465e+07			35.53	53.35	33.96	40.7		45.57	44.39	54.21		46.15			0.0016514	2.65869e-05	0.00214958	0.00043408		0.000148373	0.000209251	2.12416e-05		0.000123757			3	3	3	3		3	3
SIVTDLVSQMDPHGRR		Q2TA68	Dynamin-like 120 kDa protein, mitochondrial OS=Rattus norvegicus GN=Opa1 PE=1 SV=1 - [OPA1_RAT]	1810.92	0	0	0	4.38605e+07	0	1.63771e+07	0	0	5.6689e+07	0	0	3.10815e+07				33.32		38.08			31.25			31.43				0.00302631		0.000964699			0.00464934			0.00428072				3		3			3
SPVKVTLSEGPHHVALFK		Q2TA68	Dynamin-like 120 kDa protein, mitochondrial OS=Rattus norvegicus GN=Opa1 PE=1 SV=1 - [OPA1_RAT]	1946.08	0	0	0	8.83056e+07	63500474	0	0	0	0	0	0	9.8491e+07			39.77	49.31	51.96							72.16			0.000289956	4.39573e-05	2.45166e-05							2.76701e-07			4	3	3
TSVLEMIAQAR		Q2TA68	Dynamin-like 120 kDa protein, mitochondrial OS=Rattus norvegicus GN=Opa1 PE=1 SV=1 - [OPA1_RAT]	1218.65	0	0	138529438	1.06314e+08	77115133	5.85795e+07	123912635	31378935	1.30284e+08	7.63833e+07	1.07651e+08	9.50528e+07			81.61	71.58	63.81	64.05	66.02	70.75	86.07	74.98	71.61	71.64			3.58925e-08	3.78788e-07	2.26671e-06	2.14485e-06	1.36269e-06	4.5856e-07	1.35945e-08	1.7314e-07	3.58925e-07	3.73591e-07			2	2	2	2	2	2	2
VIQHNALEDR		Q2TA68	Dynamin-like 120 kDa protein, mitochondrial OS=Rattus norvegicus GN=Opa1 PE=1 SV=1 - [OPA1_RAT]	1194.62	0	0	1.86737e+08	9.74937e+07	118914625	1.4259e+08	9.64674e+07	3.2405e+06	1.60924e+08	102785448	8.91989e+07	0	47.04	50.88	53.08	53.9	45.62	50.81	50.49	52.04	39.16	54.6	50.7	38.33	8.40212e-05	3.38882e-05	1.89435e-05	1.69063e-05	0.000116517	3.44388e-05	3.70722e-05	2.59447e-05	0.000467155	1.47363e-05	3.53222e-05	0.000609604	3	3	2	2	2	2	2	2	2
VNDEHPAYLASDEITTVRK		Q2TA68	Dynamin-like 120 kDa protein, mitochondrial OS=Rattus norvegicus GN=Opa1 PE=1 SV=1 - [OPA1_RAT]	2158.08	0	0	0	0	0	0	0	2.63067e+07	0	34153333	3.83635e+07	46764008								42.12		45.83	50.26	71.03								0.000429633		0.000177627	6.07519e-05	5.24592e-07								3
VQLAEDLKK		Q2TA68	Dynamin-like 120 kDa protein, mitochondrial OS=Rattus norvegicus GN=Opa1 PE=1 SV=1 - [OPA1_RAT]	1043.61	3.65409e+06	1.55845e+07	1.0526e+08	6.06351e+07	6.0452e+07	7.8298e+07	7.61742e+07	0	1.20629e+08	6.40854e+07	0	6.88917e+07	36.19	41.53	37.96	34.08	34.18	34.77	46.4		43.95	41.77		39.1	0.000853549	0.000249591	0.000567843	0.00138749	0.0013941	0.00118366	8.13258e-05		0.000142965	0.000242825		0.000436745	2	2	2	2	2	2	2		2
VREIQEKLDAFIEALHQEK		Q2TA68	Dynamin-like 120 kDa protein, mitochondrial OS=Rattus norvegicus GN=Opa1 PE=1 SV=1 - [OPA1_RAT]	2296.23	0	0	2.19491e+08	1.71357e+08	0	7.83197e+07	0	1.0246e+08	0	0	0	1.5172e+08			50.73	56.93	47.63	62.36	54.72	66.66	47.34		59.07	48.19			5.02941e-05	1.15578e-05	9.92357e-05	3.22324e-06	1.92254e-05	1.22991e-06	0.000104243		7.12308e-06	9.02645e-05			3	3	4	3	4	3	4
VVVVGDQSAGKTSVLEMIAQAR		Q2TA68	Dynamin-like 120 kDa protein, mitochondrial OS=Rattus norvegicus GN=Opa1 PE=1 SV=1 - [OPA1_RAT]	2258.22	0	0	0	0	8.91405e+07	0	0	1.06289e+08	0	48942637	4.20843e+07	0					75.37			75.69		60.58	47.6						1.46653e-07			1.36236e-07		4.41867e-06	8.25455e-05						3			3
FQALKPK		Q641Z6	EH domain-containing protein 1 OS=Rattus norvegicus GN=Ehd1 PE=1 SV=1 - [EHD1_RAT]	831.509	0	0	0	0	0	1.771e+07	4.61012e+07	0	0	0	22012508	0						32.8	39.06				37.76							0.00146946	0.000347663				0.000468984							2	2
LADVDKDGLLDDEEFALANHLIK		Q641Z6	EH domain-containing protein 1 OS=Rattus norvegicus GN=Ehd1 PE=1 SV=1 - [EHD1_RAT]	2554.3	0	0	141856899	157635441	1.51325e+08	1.74768e+08	170079146	0	201352839	8.98505e+07	1.02423e+08	0			44.48	78.26	90.81	76.93	88.26		91.76	77.77	71.88				0.000278032	1.2017e-07	6.38985e-09	1.60187e-07	1.17184e-08		5.26777e-09	1.30345e-07	5.4161e-07				3	3	3	3	3		3
LLPLEEHYR		Q641Z6	EH domain-containing protein 1 OS=Rattus norvegicus GN=Ehd1 PE=1 SV=1 - [EHD1_RAT]	1169.63	0	0	0	2.0223e+07	0	0	0	0	0	0	1.31548e+07	1.26258e+07				43.98							53	43.65				0.000135981							1.70404e-05	0.000138086				2
SKLPNTVLGK		Q641Z6	EH domain-containing protein 1 OS=Rattus norvegicus GN=Ehd1 PE=1 SV=1 - [EHD1_RAT]	1056.64	0	1.71814e+07	157187874	0	0	0	1.12626e+08	0	1.48533e+08	5.67224e+07	0	59900177		51.96	44.61				41.31		62.57	46.32		45.21		1.43279e-05	7.78364e-05				0.000166411		1.24504e-06	5.25028e-05		6.77926e-05		2	2				2		2
DKPMYDEIFYTLSPVDGK		Q8R491	EH domain-containing protein 3 OS=Rattus norvegicus GN=Ehd3 PE=1 SV=2 - [EHD3_RAT]	2118	0	0	36370678	2.87579e+07	26514583	0	3.04016e+07	0	2.42787e+07	0	0	0			44.41	41.94	39.18		32.97		33.9		32.22				0.00020829	0.000396636	0.000766962		0.00330553		0.00264797		0.00377868				2	2	2		2		2
EHQISPGDFPNLKR		Q8R491	EH domain-containing protein 3 OS=Rattus norvegicus GN=Ehd3 PE=1 SV=2 - [EHD3_RAT]	1637.84	0	0	0	0	0	2.28758e+07	5.11418e+07	0	53099298	0	2.67819e+07	34054188						40.43	49.61		53.85		57.03	41.55						0.000588726	7.16541e-05		2.32835e-05		1.35735e-05	0.000454897						3	3		3
LLEVVDDMLAHDIAQLMVLVR		Q8R491	EH domain-containing protein 3 OS=Rattus norvegicus GN=Ehd3 PE=1 SV=2 - [EHD3_RAT]	2393.29	0	0	0	0	1.36744e+07	0	8.17549e+06	0	6.01606e+06	0	0	1.72093e+07					51.31		59.32		37.72			80.69					3.10634e-05		5.49665e-06		0.000786055			3.88161e-08					2		2		2
SKLPNSVLGK		Q8R491	EH domain-containing protein 3 OS=Rattus norvegicus GN=Ehd3 PE=1 SV=2 - [EHD3_RAT]	1042.62	0	15434960	102571176	6.87118e+07	87828972	3.61066e+07	8.15648e+07	0	102608017	0	0	0		44.56	38.93	38.96	44.73	38.77	48.67		44.64					6.64896e-05	0.000243082	0.000241409	6.39372e-05	0.000252205	2.5808e-05		6.5276e-05					2	2	2	2	2	2		2
AIATLMSDEVFHDIAYK		Q9JI66	Electrogenic sodium bicarbonate cotransporter 1 OS=Rattus norvegicus GN=Slc4a4 PE=1 SV=1 - [S4A4_RAT]	1923.95	0	0	4.07736e+07	0	4.55732e+07	0	93283537	6.3897e+07	45751922	0	2.64299e+07	4.73772e+07			82.79		81.28		75.53	89.17	74.77		59.97	55.34			3.52432e-08		5.17589e-08		2.15522e-07	9.32161e-09	2.40067e-07		6.44436e-06	2.10539e-05			3		3		3	3	3
HVCDEEEVEGHHTIYIGVHVPK	C3(Methylthio)	Q9JI66	Electrogenic sodium bicarbonate cotransporter 1 OS=Rattus norvegicus GN=Slc4a4 PE=1 SV=1 - [S4A4_RAT]	2573.19	0	0	0	0	0	0	0	3.61977e+08	0	1.12596e+08	207227891	0							34.77	35.39	31.4	33.48	32.08	34.85							0.00206724	0.00176331	0.0044915	0.00280466	0.0047697	0.00250416							5	4	5
ISENYSDKSDVENADESSSSILKPLISPAAER		Q9JI66	Electrogenic sodium bicarbonate cotransporter 1 OS=Rattus norvegicus GN=Slc4a4 PE=1 SV=1 - [S4A4_RAT]	3451.67	0	0	8.39873e+07	0	121218938	7.29472e+07	0	4.66531e+07	0	5.47263e+07	0	0			35.26		31.11	34.49	34.31	39.33		30.58					0.00282959		0.00739611	0.00339628	0.00366974	0.00112014		0.00839984					3		3	3	4	3
MFSNPDNGSPAMTHR	M1(Oxidation); N7(Deamidated)	Q9JI66	Electrogenic sodium bicarbonate cotransporter 1 OS=Rattus norvegicus GN=Slc4a4 PE=1 SV=1 - [S4A4_RAT]	1678.69	0	0	0	3.99614e+07	76995088	2.5916e+07	25455451	0	3.65322e+07	0	0	0		34.47		42.67	52.87	63.34	45.82		41.81	56.96	57.06			0.000482318		7.30018e-05	7.22983e-06	5.79309e-07	3.66546e-05		9.22843e-05	2.71853e-06	2.75504e-06			2		3	3	3	3		3
MFSNPDNGSPAMTHR	N7(Deamidated)	Q9JI66	Electrogenic sodium bicarbonate cotransporter 1 OS=Rattus norvegicus GN=Slc4a4 PE=1 SV=1 - [S4A4_RAT]	1662.7	0	0	89200395	0	68258745	1.74497e+07	6.45087e+07	0	5.35569e+07	1.38085e+07	0	2.1009e+07		43.87	93.63		72.77	67.65	88.42		72.54	52.54		63.17		4.51225e-05	4.76862e-10		6.07712e-08	1.8897e-07	1.58268e-09		5.85045e-08	6.12904e-06		5.5424e-07		3	2		2	2	2		2
NLTSSSLNDISDKPEKDQLK		Q9JI66	Electrogenic sodium bicarbonate cotransporter 1 OS=Rattus norvegicus GN=Slc4a4 PE=1 SV=1 - [S4A4_RAT]	2232.14	0	0	0	0	5.97656e+07	0	1.11847e+08	1.30434e+07	1.37457e+08	74178862	0	8.18906e+07					39.56		48.32	45.13	72.02	33.15		72.36					0.000979362		0.000131036	0.000256263	5.55832e-07	0.00406705		4.84938e-07					3		3	3	3
NLTSSSLNDISDKPEKDQLKNK		Q9JI66	Electrogenic sodium bicarbonate cotransporter 1 OS=Rattus norvegicus GN=Slc4a4 PE=1 SV=1 - [S4A4_RAT]	2474.27	0	0	0	0	0	3.80406e+07	2.06844e+07	0	2.76761e+07	0	23389986	7.01309e+07				32.68		49.57	33.26		41.41		59.97	40.1				0.00439701		8.55661e-05	0.00391812		0.000603513		8.35753e-06	0.000737814				4		3	3		3
SLADIGKTVSSASR		Q9JI66	Electrogenic sodium bicarbonate cotransporter 1 OS=Rattus norvegicus GN=Slc4a4 PE=1 SV=1 - [S4A4_RAT]	1391.75	0	0	121569843	7.7335e+07	0	9.25829e+07	0	2.51267e+07	0	0	0	0			85.82	43.01		76.89		58.24							1.55782e-08	0.000267518		9.51597e-08		8.84814e-06							2	2		2		2
WIKFEEKVEQGGER		Q9JI66	Electrogenic sodium bicarbonate cotransporter 1 OS=Rattus norvegicus GN=Slc4a4 PE=1 SV=1 - [S4A4_RAT]	1734.88	0	0	45314773	0	0	3.32205e+07	6.18744e+07	0	6.5402e+07	0	0	0			41.43			48.31	50.43	76.45	52.63						0.000532392			0.000116581	7.29115e-05	1.82304e-07	3.95674e-05						3			3	3	2	3
WSKPHVATLSLHSLFELR		Q9JI66	Electrogenic sodium bicarbonate cotransporter 1 OS=Rattus norvegicus GN=Slc4a4 PE=1 SV=1 - [S4A4_RAT]	2121.16	0	0	4.20208e+07	3.02715e+07	2.93008e+07	0	0	0	0	31488545	0	0			41.4	62.86	58.48					71.59					0.000322374	2.38099e-06	6.38576e-06					3.18976e-07					3	3	3
GLKSGENFKLLYDLADQLHAAVGASR		P13803	Electron transfer flavoprotein subunit alpha, mitochondrial OS=Rattus norvegicus GN=Etfa PE=1 SV=4 - [ETFA_RAT]	2773.47	0	0	0	1.1207e+07	0	0	0	0	0	3.02306e+07	0	2.70634e+07				35.2						63.82	77.3	37.58				0.00172137						2.17851e-06	9.77596e-08	0.00097766				4
IVAPELYIAVGISGAIQHLAGMKDSK		P13803	Electron transfer flavoprotein subunit alpha, mitochondrial OS=Rattus norvegicus GN=Etfa PE=1 SV=4 - [ETFA_RAT]	2681.47	0	0	0	1.29245e+07	0	0	0	0	0	5.45435e+06	1.7605e+07	1.9665e+07				42.74						66.99	61.67	49.31				0.000186238						6.69954e-07	2.24654e-06	3.92685e-05				3
LLYDLADQLHAAVGASR		P13803	Electron transfer flavoprotein subunit alpha, mitochondrial OS=Rattus norvegicus GN=Etfa PE=1 SV=4 - [ETFA_RAT]	1812.96	0	0	9.73795e+07	0	0	0	0	0	0	7.49732e+07	0	5.15451e+07			78.62		60.22		71.46	67.8		73.6	49.53	91.46			7.48853e-08		5.75116e-06		4.35843e-07	1.01235e-06		2.66275e-07	6.57434e-05	4.35843e-09			2		3		3	3
LNVAPVSDIIEIKSPDTFVR		P13803	Electron transfer flavoprotein subunit alpha, mitochondrial OS=Rattus norvegicus GN=Etfa PE=1 SV=4 - [ETFA_RAT]	2213.23	0	0	3.86125e+07	3.6886e+07	0	0	0	0	0	2.49804e+07	13473808	0			59.9	45.09						30.85	52.75				3.83735e-06	0.000128543						0.00394676	2.54825e-05				3	3
SGENFKLLYDLADQLHAAVGASR		P13803	Electron transfer flavoprotein subunit alpha, mitochondrial OS=Rattus norvegicus GN=Etfa PE=1 SV=4 - [ETFA_RAT]	2475.26	0	0	1.15073e+08	1.015e+08	1.97889e+08	4.998e+07	4.25678e+07	0	0	8.34461e+07	1.84535e+08	1.39676e+07			93.08	44.08	91.62	85.42	77.45			89.35	99.35	100.21			4.67438e-09	0.000357619	6.4389e-09	2.62676e-08	1.69993e-07			1.14403e-08	1.08015e-09	8.90864e-10			3	3	3	3	3
VVPEMTEILK		P13803	Electron transfer flavoprotein subunit alpha, mitochondrial OS=Rattus norvegicus GN=Etfa PE=1 SV=4 - [ETFA_RAT]	1158.64	0	0	0	107736947	8.64847e+07	8.33207e+07	1.31691e+08	0	1.44937e+08	5.83047e+07	7.90963e+07	65072890				36.84	46.07	40.37	36.02		37.89	35.92	37.9	39.28				0.00130419	0.000163134	0.000454575	0.00140019		0.00112976	0.00159912	0.00103796	0.0007377				2	2	2	2		2
EIDGGLETIR		Q68FU3	Electron transfer flavoprotein subunit beta OS=Rattus norvegicus GN=Etfb PE=2 SV=3 - [ETFB_RAT]	1102.57	0	1.55075e+07	35541101	0	0	32600401	0	0	0	0	0	0		64.42	63.02			60.02								1.87933e-06	2.49442e-06			5.32542e-06								2	2			2
GIHVEVPGAEAENLGPLQVAR		Q68FU3	Electron transfer flavoprotein subunit beta OS=Rattus norvegicus GN=Etfb PE=2 SV=3 - [ETFB_RAT]	2156.14	1.57339e+07	0	78860786	0	0	5.11987e+07	0	0	0	0	0	0	65.35		64.24			55.98				44.74			1.94009e-06		2.50508e-06			1.62765e-05				0.000224944			3		3			3
LAEKEKVDLLFLGK		Q68FU3	Electron transfer flavoprotein subunit beta OS=Rattus norvegicus GN=Etfb PE=2 SV=3 - [ETFB_RAT]	1602.94	0	0	1.58068e+08	1.09249e+08	113338177	0	139581794	0	0	116142450	1.13455e+08	1.28252e+08			67.61	70.59	46.86		49.62	55.81		43.82	37.22	59.59			1.7297e-07	8.72971e-08	3.09094e-05		1.30973e-05	2.618e-06		4.13971e-05	0.000189221	1.0964e-06			3	3	3		3	2
LKLPAVVTADLR		Q68FU3	Electron transfer flavoprotein subunit beta OS=Rattus norvegicus GN=Etfb PE=2 SV=3 - [ETFB_RAT]	1295.8	0	0	285153955	2.62929e+08	2.44147e+08	1.51727e+08	2.51707e+08	0	257599445	1.76189e+08	186530209	172969653			67.31	80.6	81.06	81.05	67.51		67.41	63.3	81.04	70.26			1.8534e-07	8.689e-09	7.81574e-09	7.83376e-09	1.76999e-07		1.81121e-07	4.66627e-07	7.85181e-09	9.39658e-08			2	2	2	2	2		2
TALAMGADR		Q68FU3	Electron transfer flavoprotein subunit beta OS=Rattus norvegicus GN=Etfb PE=2 SV=3 - [ETFB_RAT]	905.45	0	0	0	2.04268e+07	0	0	4.10612e+07	0	0	2.2559e+07	0	15903770				38.61			49.83			33.33		36.2				0.000399391			3.06776e-05			0.00134709		0.00111546				2			2
VDLLFLGK		Q68FU3	Electron transfer flavoprotein subunit beta OS=Rattus norvegicus GN=Etfb PE=2 SV=3 - [ETFB_RAT]	904.55	0	0	0	0	0	0	12591061	0	10637878	4.35784e+06	0	0							58.46		58.32	58.16									1.99585e-06		2.06124e-06	2.06221e-06									2		2
GITINAAHVEYSTAAR		P85834	Elongation factor Tu, mitochondrial OS=Rattus norvegicus GN=Tufm PE=1 SV=1 - [EFTU_RAT]	1673.86	0	0	0	0	3.84085e+07	0	0	7.26529e+07	3.75635e+07	0	0	0					75.9			56.68	61.32								1.64505e-07			1.26722e-05	4.16916e-06								2			2	2
GTVVTGTLER		P85834	Elongation factor Tu, mitochondrial OS=Rattus norvegicus GN=Tufm PE=1 SV=1 - [EFTU_RAT]	1032.57	0	8.0644e+06	42032055	0	0	1.8685e+07	4.11799e+07	0	4.47939e+07	0	0	0		37.58	32.99			36.64	37.91		37.63					0.000811807	0.00258706			0.00100798	0.000833311		0.000802515					2	2			2	2		2
ILAEGGGAK		P85834	Elongation factor Tu, mitochondrial OS=Rattus norvegicus GN=Tufm PE=1 SV=1 - [EFTU_RAT]	815.462	0	1.33184e+07	0	0	0	0	0	836663	0	4.12246e+07	0	0		58.05						78.09		63.07				7.67708e-06						7.6067e-08		2.41655e-06				2						2
LLDAVDTYIPVPTR		P85834	Elongation factor Tu, mitochondrial OS=Rattus norvegicus GN=Tufm PE=1 SV=1 - [EFTU_RAT]	1572.86	0	0	0	3.93097e+07	0	0	85925387	0	69158712	2.38998e+07	5.59788e+07	3.63027e+07				75.49			85.77		85.97	79.47	79.77	78.08				1.46894e-07			1.33749e-08		1.31523e-08	5.81845e-08	5.32465e-08	7.70203e-08				2			2		2
SLERAEAGDNLGALVR		P85834	Elongation factor Tu, mitochondrial OS=Rattus norvegicus GN=Tufm PE=1 SV=1 - [EFTU_RAT]	1670.88	0	0	0	4.6341e+07	0	45415081	0	0	4.01312e+07	3.16839e+07	0	0				57.71	54.04	77.47			62.66	36.12						1.22839e-05	2.54425e-05	1.22657e-07			3.68561e-06	0.00175927						2	3	2			2
TTLTAAITK		P85834	Elongation factor Tu, mitochondrial OS=Rattus norvegicus GN=Tufm PE=1 SV=1 - [EFTU_RAT]	919.547	0	1.04229e+07	0	0	0	1.66567e+07	0	0	0	19980884	0	0		44.1				34.57				41.14				5.83568e-05				0.000680824				0.00014998				2				2
TVVTGIEMFHK		P85834	Elongation factor Tu, mitochondrial OS=Rattus norvegicus GN=Tufm PE=1 SV=1 - [EFTU_RAT]	1261.65	0	0	0	2.48665e+07	3.22591e+07	5.16743e+07	0	0	0	1.02343e+08	70031099	75728484				37.2	40.47	58.39		51.52		65.21	58.78	77.28				0.00107659	0.00047115	6.59191e-06		3.84058e-05		1.56676e-06	6.88658e-06	8.79221e-08				2	2	2		3
AKLSMINTMSK		O35179	Endophilin-A1 OS=Rattus norvegicus GN=Sh3gl2 PE=1 SV=2 - [SH3G2_RAT]	1223.65	0	0	0	0	0	3.55175e+07	0	1.21776e+07	0	4.25131e+07	0	0						47.6		62.67		47.84								5.38718e-05		1.81153e-06		5.7553e-05								2		2
AVMEIMTK		O35179	Endophilin-A1 OS=Rattus norvegicus GN=Sh3gl2 PE=1 SV=2 - [SH3G2_RAT]	922.474	0	1.62827e+07	6.28273e+07	3.79134e+07	3.57436e+07	3.21555e+07	30239649	3.76697e+06	0	0	0	40039045		43.78	38.42	36.46	33.42	40.55	38.15	35.12				35.76		0.000113074	0.00039567	0.000655236	0.00191095	0.000255504	0.000413394	0.000892068				0.000716744		2	2	2	2	2	2	2
GPGYPQAEALLAEAMLK		O35179	Endophilin-A1 OS=Rattus norvegicus GN=Sh3gl2 PE=1 SV=2 - [SH3G2_RAT]	1758.91	0	0	1.48257e+08	84244716	60891650	7.17121e+07	102239318	0	1.13434e+08	4.51606e+07	9.34858e+07	47424733			60.08	53.23	57.75	59.86	62.07		64.7	70.65	61.06	49.31			7.21585e-06	3.30358e-05	1.16677e-05	7.22933e-06	4.284e-06		2.27026e-06	5.94086e-07	5.01395e-06	8.14676e-05			2	2	2	2	2		2
IRGQEKGPGYPQAEALLAEAMLK		O35179	Endophilin-A1 OS=Rattus norvegicus GN=Sh3gl2 PE=1 SV=2 - [SH3G2_RAT]	2470.31	0	0	1.3388e+08	1.19198e+08	167768849	1.07669e+08	71651037	0	85838974	7.2839e+07	1.04313e+08	101007518			36.83	72.58	60.06	81.79	53.65	56.37	73.18	67.83	64.28	62.5			0.00137982	2.92601e-07	5.62179e-06	3.44353e-08	2.2439e-05	1.28024e-05	2.50036e-07	8.73526e-07	2.10886e-06	2.95229e-06			4	4	4	4	4	4	4
QNFIDPLQNLHDKDLR		O35179	Endophilin-A1 OS=Rattus norvegicus GN=Sh3gl2 PE=1 SV=2 - [SH3G2_RAT]	1966.01	0	0	151801055	1.47907e+08	0	87575965	250822142	0	189217700	8.31348e+07	129632153	0			39.94	41.26		44.94	44.21		46.69	54.54	46.86				0.000603277	0.000460124		0.000192376	0.000227589		0.000128573	2.1621e-05	0.000108183				3	3		3	3		3
VGGAEGTKLDDDFKEMER		O35179	Endophilin-A1 OS=Rattus norvegicus GN=Sh3gl2 PE=1 SV=2 - [SH3G2_RAT]	1996.93	0	0	0	0	0	0	74191806	0	0	68127360	4.68845e+07	6.70928e+07						62.75	64.54			60.12	62.6	48.93						2.36244e-06	1.65233e-06			4.23145e-06	2.69275e-06	6.01309e-05						3	3
QAVQILEELADKLK		O35964	Endophilin-A2 OS=Rattus norvegicus GN=Sh3gl1 PE=1 SV=1 - [SH3G1_RAT]	1597.92	0	0	92776894	0	0	3.92873e+07	0	0	44617904	0	4.64904e+07	0			74.87		67.05	56.86	63.08		56.61		57.63	63.73			8.96051e-08		4.43795e-07	5.66673e-06	1.35311e-06		6.00251e-06		4.83235e-06	1.1862e-06			2		3	2	3		2
QAVQILEELADKLKR		O35964	Endophilin-A2 OS=Rattus norvegicus GN=Sh3gl1 PE=1 SV=1 - [SH3G1_RAT]	1754.02	0	0	60336557	0	47144698	2.27906e+07	0	0	0	2.34039e+07	0	0			54.8		66.53	61.2				58.74					4.47027e-06		4.11312e-07	1.36544e-06				2.4727e-06					3		3	3
QNFIDPLQNLCDKDLK	C11(Methylthio)	O35964	Endophilin-A2 OS=Rattus norvegicus GN=Sh3gl1 PE=1 SV=1 - [SH3G1_RAT]	1949.94	0	0	0	0	0	0	2.93508e+07	0	1.77632e+07	0	9.18883e+06	0							34.12		59.17		43.99								0.00253654		8.05048e-06		0.000243405								3		3
VGGAEGTKLDDDFREMEK		O35964	Endophilin-A2 OS=Rattus norvegicus GN=Sh3gl1 PE=1 SV=1 - [SH3G1_RAT]	1996.93	0	0	0	0	0	0	74191806	0	0	68127360	4.68845e+07	0						37.79	54.83			40.67	38.2							0.000740219	1.5456e-05			0.000372811	0.000741645							3	3
GKVPVTYLELLS		Q5PPJ9	Endophilin-B2 OS=Rattus norvegicus GN=Sh3glb2 PE=2 SV=2 - [SHLB2_RAT]	1318.76	0	0	2.04838e+07	0	0	1.17745e+07	0	0	0	9.5731e+06	12097211	0			30.01			30.45				40.16	37.5				0.00304299			0.00229901				0.000245776	0.000533484				2			2
KGKVPVTYLELLS		Q5PPJ9	Endophilin-B2 OS=Rattus norvegicus GN=Sh3glb2 PE=2 SV=2 - [SHLB2_RAT]	1446.85	0	0	0	0	0	17834147	0	0	3.1407e+07	2.10876e+07	0	0						58.24			55.28	38.52								1.49613e-06			4.15076e-06	0.000140605								2			2
KVPSRVTNGELLAQYMAEAASELGPNTPYGK	N8(Deamidated)	Q5PPJ9	Endophilin-B2 OS=Rattus norvegicus GN=Sh3glb2 PE=2 SV=2 - [SHLB2_RAT]	3292.65	0	0	9.64859e+07	0	5.34608e+07	0	0	0	0	42219716	0	0			40.17		43.21					32.06					0.000908724		0.000422613					0.00553847					4		4
LGAAERDFIHTASLSFLTPLR		Q5PPJ9	Endophilin-B2 OS=Rattus norvegicus GN=Sh3glb2 PE=2 SV=2 - [SHLB2_RAT]	2315.25	0	0	0	0	0	3.51729e+07	0	1.29296e+08	0	5.12741e+07	0	0						43.38		62.07		67.22	78.65	64.76						0.000225007		3.04226e-06		1.01474e-06	6.89114e-08	1.90491e-06						3		3
EATEKEFEPLLNWMKDK		Q66HD0	Endoplasmin OS=Rattus norvegicus GN=Hsp90b1 PE=1 SV=2 - [ENPL_RAT]	2108.03	0	0	2.33809e+08	0	0	1.16588e+08	0	0	186234857	8.86262e+07	1.42721e+08	0			64.84			60.3			52.68	64.39	58.12				2.32948e-06			6.39279e-06			3.77657e-05	2.54741e-06	1.18711e-05				3			3			3
FQSSHHSTDITSLDQYVER		Q66HD0	Endoplasmin OS=Rattus norvegicus GN=Hsp90b1 PE=1 SV=2 - [ENPL_RAT]	2250.04	1.09242e+07	0	0	0	4.09588e+07	0	7.90518e+07	9.44027e+07	53275046	0	0	5.11118e+07	42.15				33.24		73.45	66.33	37.79			69.15	0.00036877				0.00237121		2.66595e-07	1.28045e-06	0.000914877			7.1755e-07	3				3		3	3	3
LTESPCALVASQYGWSGNMER	C6(Methylthio)	Q66HD0	Endoplasmin OS=Rattus norvegicus GN=Hsp90b1 PE=1 SV=2 - [ENPL_RAT]	2345.04	0	0	1.02535e+08	0	0	0	0	5.44709e+07	4.27091e+07	46439436	58010881	6.99192e+07			48.2					59.58	47.59	85.93	67.23	63.9			5.14611e-05					4.02062e-06	6.3576e-05	9.06209e-09	6.0555e-07	1.48694e-06			2					2	2
TFEINPR		Q66HD0	Endoplasmin OS=Rattus norvegicus GN=Hsp90b1 PE=1 SV=2 - [ENPL_RAT]	876.457	0	9135097	0	0	3.88417e+07	2.19519e+07	0	0	8.64493e+07	3.38714e+07	26263506	0		43.36			41.28	40.44			40.56	41.41	37.6			0.000235272			0.000383537	0.000497007			0.000448301	0.000368613	0.000886278			2			2	2			2
AFAAGADIKEMQNR	M11(Oxidation)	P14604	Enoyl-CoA hydratase, mitochondrial OS=Rattus norvegicus GN=Echs1 PE=1 SV=1 - [ECHM_RAT]	1537.74	0	0	0	0	1.08224e+07	0	0	2.43317e+06	0	0	6036268	0					30.69			62.5			55.89						0.00563046			3.73957e-06			1.4041e-05						2			2
AFAAGADIKEMQNR		P14604	Enoyl-CoA hydratase, mitochondrial OS=Rattus norvegicus GN=Echs1 PE=1 SV=1 - [ECHM_RAT]	1521.74	0	0	1.20047e+08	0	0	0	5.7422e+07	0	0	5.86197e+07	0	6.66123e+07			73.49				87.38			91.84		83.75			2.37288e-07				9.50612e-09			3.6005e-09		2.71994e-08			2				2
IFPVETLVEEAIQCAEK	C14(Methylthio)	P14604	Enoyl-CoA hydratase, mitochondrial OS=Rattus norvegicus GN=Echs1 PE=1 SV=1 - [ECHM_RAT]	1964.97	0	0	3.32669e+07	6.09725e+07	0	6.9964e+07	1.16438e+08	15510710	9.34376e+07	2.9275e+07	0	41653493			70.06	54.01		42.65	47.15	45.49	54.12	42.53		48.57			7.00258e-07	2.48245e-05		0.000334099	0.000118543	0.00017373	2.36227e-05	0.000343459		9.24318e-05			2	2		2	2	2	2
NSSVGLIQLNRPK		P14604	Enoyl-CoA hydratase, mitochondrial OS=Rattus norvegicus GN=Echs1 PE=1 SV=1 - [ECHM_RAT]	1425.82	1.65344e+07	0	158178634	117008834	0	0	0	0	0	7.30008e+07	9.36363e+07	8.33453e+07	91.36		61	53.37						78.94	77.04	92.82	1.46228e-09		2.06525e-06	8.975e-06						2.68052e-08	4.25048e-08	1.09703e-09	2		2	2
SLAMEMVLTGDRISAQDAK		P14604	Enoyl-CoA hydratase, mitochondrial OS=Rattus norvegicus GN=Echs1 PE=1 SV=1 - [ECHM_RAT]	2036.01	0	0	0	0	0	0	0	0	3.21648e+07	1.72505e+07	1.94644e+07	0			36.54					30.9	64.47	58.37	56.75				0.00154165					0.00613687	2.41159e-06	1.08432e-05	1.56398e-05				3					3	2
GKITNLAQLSAANHDAAIFPGGFGAAK		P56571	ES1 protein homolog, mitochondrial OS=Rattus norvegicus PE=1 SV=2 - [ES1_RAT]	2640.38	2.12644e+08	0	9.59361e+08	0	0	587876986	4.29727e+08	1.01328e+08	305361340	0	699334460	597320711	55.49		52.23		39.25	77.98	54.37	77.86	50.05		73.16	70.66	1.58193e-05		3.79991e-05		0.000736871	8.99598e-08	2.04733e-05	9.16617e-08	5.48647e-05		2.68098e-07	4.81048e-07	3		3		2	3	3	3	3
GVEVTVGHEQEEGGKWPYAGTAEAVK		P56571	ES1 protein homolog, mitochondrial OS=Rattus norvegicus PE=1 SV=2 - [ES1_RAT]	2728.32	0	0	0	0	58288639	0	85028384	4.8033e+07	0	0	0	0					77.59		78.15	49.04									1.41957e-07		1.30908e-07	0.000104157									3		3	3
GVTEAHVDQK		P56571	ES1 protein homolog, mitochondrial OS=Rattus norvegicus PE=1 SV=2 - [ES1_RAT]	1083.54	0	1.59318e+07	0	0	0	6.99315e+07	2.63064e+07	0	0	0	2.4926e+07	0		43.05				43.7	32.81				33.43			0.000138726				0.000119442	0.00146608				0.00127104			2				2	2
HCVKGVTEAHVDQK	C2(Methylthio)	P56571	ES1 protein homolog, mitochondrial OS=Rattus norvegicus PE=1 SV=2 - [ES1_RAT]	1596.76	2.87445e+07	0	0	0	45236365	3.25903e+07	0	4.75683e+06	0	1.0736e+07	0	0	45.05				55.48	51.81		43.16		31.6			0.000154741				1.33075e-05	3.19699e-05		0.000239114		0.00335538			3				3	3		3
ITNLAQLSAANHDAAIFPGGFGAAK		P56571	ES1 protein homolog, mitochondrial OS=Rattus norvegicus PE=1 SV=2 - [ES1_RAT]	2455.27	8.3603e+07	0	153606390	2.34652e+08	3.43709e+08	0	0	0	2.39285e+08	0	0	2.22531e+08	30.83		48.22	52.29	40.51				62.05	31.23		61.32	0.00532794		0.000113749	3.8068e-05	0.000600211				4.08546e-06	0.00512282		5.27602e-06	3		3	3	3				3
KPIGLCCIAPVLAAK	C6(Methylthio); C7(Methylthio)	P56571	ES1 protein homolog, mitochondrial OS=Rattus norvegicus PE=1 SV=2 - [ES1_RAT]	1588.84	0	0	215781367	1.62097e+08	0	86569698	0	0	0	1.60367e+08	2.26019e+08	1.45253e+08			40.16	49.97	51.65	37.5	48.16		53.7	49.39	52.99	47.32			0.000573478	6.49471e-05	4.41123e-05	0.00107586	0.000103111		2.60214e-05	7.42266e-05	3.06429e-05	0.000117699			2	2	3	2	3		3
KVLELTGK		P56571	ES1 protein homolog, mitochondrial OS=Rattus norvegicus PE=1 SV=2 - [ES1_RAT]	887.555	0	3.94731e+07	0	0	0	0	0	0	0	0	0	0		53.33		40		39.72	38.07		43.62	56.37	42.41			1.06839e-05		0.000265		0.000282648	0.000413281		9.99374e-05	6.11288e-06	0.000152141			2		2		2	2		2
NKVVTTPAFMCETELHHIHDGIGAMVK	C11(Methylthio)	P56571	ES1 protein homolog, mitochondrial OS=Rattus norvegicus PE=1 SV=2 - [ES1_RAT]	3024.46	0	0	9.11013e+08	337860066	4.98755e+08	2.4408e+08	3.05009e+08	1.98936e+08	0	1.91218e+08	3.56429e+08	4.08836e+08			52.06	38.48	59.95	50.29	45.49	48.25		45.05	53.8	44.2			5.44513e-05	0.00123458	8.649e-06	7.99772e-05	0.00024294	0.000128676		0.000265717	3.3558e-05	0.000323161			4	4	4	4	4	4
NLSTFAVDGKDCK	C12(Methylthio)	P56571	ES1 protein homolog, mitochondrial OS=Rattus norvegicus PE=1 SV=2 - [ES1_RAT]	1443.66	1.04729e+08	0	1.18841e+08	8.84734e+07	1.62458e+08	0	3.63353e+07	2.11618e+07	9.53808e+07	73708038	1.0141e+08	100829451	53.97		67.91	43.6	75.47		64.78	84.49	65.79	79.01	52.27	52.5	1.02221e-05		3.80249e-07	0.000109129	7.23669e-08		8.48282e-07	9.0686e-09	6.72265e-07	3.14007e-08	1.51196e-05	1.43397e-05	2		2	2	2		2	2	2
NVLAESAR		P56571	ES1 protein homolog, mitochondrial OS=Rattus norvegicus PE=1 SV=2 - [ES1_RAT]	859.463	0	3.24369e+07	0	4.56143e+07	0	1.48104e+08	0	0	0	0	5.22925e+07	4.9282e+07		36.08		36.55		52.08					36.15	36.38		0.00136865		0.00122827		3.4379e-05					0.0013225	0.00125429		2		2		2
VLKEFHGAK		P56571	ES1 protein homolog, mitochondrial OS=Rattus norvegicus PE=1 SV=2 - [ES1_RAT]	1028.59	1.16919e+07	0	0	0	0	0	3.5125e+07	996609	33444020	3.73499e+07	0	0	34.65						38.89	30.48	37.48	35.57			0.00104544						0.000393822	0.00268609	0.000544879	0.000831996			2						2	2	2
VVTTPAFMCETELHHIHDGIGAMVK	C9(Methylthio)	P56571	ES1 protein homolog, mitochondrial OS=Rattus norvegicus PE=1 SV=2 - [ES1_RAT]	2782.31	0	0	73650942	0	56497510	3.43916e+07	5.36418e+07	0	5.39196e+07	0	7.55087e+07	0			41.31		48.32	58.8	44.56		40.14	33.36	33.75				0.000454857		9.49642e-05	8.17319e-06	0.000215216		0.000610015	0.0029063	0.00259343				3		3	3	3		3
CLEENNGVDKR	C1(Methylthio)	P24942	Excitatory amino acid transporter 1 OS=Rattus norvegicus GN=Slc1a3 PE=1 SV=2 - [EAA1_RAT]	1322.58	0	1.35905e+07	8.69267e+07	5.35335e+07	5.82764e+07	9.57483e+07	1.3161e+08	3.06142e+06	1.18227e+08	6.42397e+07	16148308	3.41737e+07		66.01	66.03	67.31	69.68	64.3	67.18	61.69	70.26	63.99	61.05	60.36		5.88936e-07	5.8623e-07	4.36584e-07	2.63734e-07	9.10261e-07	4.4985e-07	1.62634e-06	2.21344e-07	9.37709e-07	1.92383e-06	2.16306e-06		2	2	2	2	2	2	2	2
CLEENNGVDKR	C1(Methylthio); N6(Deamidated)	P24942	Excitatory amino acid transporter 1 OS=Rattus norvegicus GN=Slc1a3 PE=1 SV=2 - [EAA1_RAT]	1323.57	5.1016e+07	7.6189e+07	8.37014e+07	2.4065e+08	1.36914e+08	4.51073e+08	2.46219e+08	1.16846e+07	1.31021e+08	291687714	8.48617e+07	2.50721e+08	60.79	66.68	66.49	61.51	70.16	64.42	64.34	62.08	66.83	67.5	77.55	67.51	1.20884e-06	3.11435e-07	3.36582e-07	1.13011e-06	1.39755e-07	5.78256e-07	5.33787e-07	8.9819e-07	3.00862e-07	2.57851e-07	2.54899e-08	2.57257e-07	2	2	2	2	2	2	2	2	2
EGKIVQVTAADAFLDLIR		P24942	Excitatory amino acid transporter 1 OS=Rattus norvegicus GN=Slc1a3 PE=1 SV=2 - [EAA1_RAT]	1959.09	0	0	0	1.07305e+07	0	9.93147e+06	0	0	0	9.13543e+06	1.40451e+07	1.55932e+07				74.05		72.46	101.76			59.93	91.68	74.69				1.29872e-07		2.07154e-07	2.4005e-10			3.6585e-06	2.27533e-09	1.17171e-07				3		3	2
IVQVTAADAFLDLIR		P24942	Excitatory amino acid transporter 1 OS=Rattus norvegicus GN=Slc1a3 PE=1 SV=2 - [EAA1_RAT]	1644.94	0	0	0	0	0	0	0	0	0	0	4.59224e+07	2.04183e+07								53.13			74.61	79.88								2.21315e-05			1.27998e-07	3.70086e-08								2
KPYQLIAQDNEPEKPVADSETKM		P24942	Excitatory amino acid transporter 1 OS=Rattus norvegicus GN=Slc1a3 PE=1 SV=2 - [EAA1_RAT]	2631.3	0	0	74774828	73916444	0	0	0	3.59118e+06	0	0	5.5685e+07	78483884			53.88	52.78				49.01			43.35	67.7			3.49918e-05	4.61326e-05				0.000106763			0.000420767	1.61333e-06			3	3				3
KPYQLIAQDNEPEKPVADSETKM	M23(Oxidation)	P24942	Excitatory amino acid transporter 1 OS=Rattus norvegicus GN=Slc1a3 PE=1 SV=2 - [EAA1_RAT]	2647.29	0	0	3.26972e+07	2.47807e+07	0	22168060	0	0	0	2.312e+07	28583116	3.27438e+07			45.89	41.7		72.4				42.43	71.25	56.2			0.000218987	0.000520584		4.57475e-07				0.000511473	6.44909e-07	1.77514e-05			3	3		3
NMFPPNLVEACFK	C11(Methylthio)	P24942	Excitatory amino acid transporter 1 OS=Rattus norvegicus GN=Slc1a3 PE=1 SV=2 - [EAA1_RAT]	1555.71	0	0	2.14661e+07	3.24192e+07	0	0	3.71941e+07	0	48715208	0	2.12171e+07	16608900			48.6	40.29			54.52		45.35		39.68	43.22			4.90036e-05	0.000341423			1.32444e-05		0.000105027		0.00039291	0.000176279			2	2			2		2
TTTNVLGDSLGAGIVEHLSR		P24942	Excitatory amino acid transporter 1 OS=Rattus norvegicus GN=Slc1a3 PE=1 SV=2 - [EAA1_RAT]	2040.07	0	0	0	96405608	0	0	0	2.88865e+07	0	41551054	6.00661e+07	0				107.05	100.68	115.43		32.46	110.74	48.02	81.92					1.09469e-10	4.74562e-10	1.58962e-11		0.00314987	4.68051e-11	8.75574e-05	3.47051e-08					3	2	2		3	2
CLEDNLGIDKR	C1(Methylthio)	P31596	Excitatory amino acid transporter 2 OS=Rattus norvegicus GN=Slc1a2 PE=1 SV=2 - [EAA2_RAT]	1321.61	0	1.28008e+07	1.9106e+09	0	1317215216	0	0	8.35947e+07	0	0	0	1.04707e+09		59.37	58.12	51.35	65.48			60.51				67.68		4.79787e-06	6.47514e-06	2.45496e-05	1.17503e-06			3.69018e-06				5.37416e-07		2	2	3	2			2
MHDSHLSSEEPK	M1(Oxidation)	P31596	Excitatory amino acid transporter 2 OS=Rattus norvegicus GN=Slc1a2 PE=1 SV=2 - [EAA2_RAT]	1412.61	0	1.58244e+06	0	0	0	5.39272e+07	0	0	2.97789e+07	0	2.92033e+07	2.70067e+07		40.91				51.5			37.41		44.23	51.2		0.000125699				1.09732e-05			0.000281405		5.85237e-05	1.1758e-05		2				2			2
MHDSHLSSEEPKHR		P31596	Excitatory amino acid transporter 2 OS=Rattus norvegicus GN=Slc1a2 PE=1 SV=2 - [EAA2_RAT]	1689.77	1.25446e+06	0	0	2.21828e+06	0	2.54785e+08	0	0	0	0	0	3.97701e+06	35.72	52.72	60.71	46.97	47.89	77.58	68.67		43.2	66.87	50	75.75	0.000736771	1.52351e-05	2.20787e-06	5.12319e-05	4.63281e-05	4.45185e-08	3.39578e-07		0.000131623	5.5509e-07	2.85e-05	6.91789e-08	2	3	3	2	4	2	3		4
MHDSHLSSEEPKHR	M1(Oxidation)	P31596	Excitatory amino acid transporter 2 OS=Rattus norvegicus GN=Slc1a2 PE=1 SV=2 - [EAA2_RAT]	1705.77	1.04501e+07	2.23528e+06	3.60192e+06	2.34547e+07	3.8871e+07	0	2.29003e+07	0	4.03459e+07	2.74155e+07	5.40976e+06	4.33369e+07	86.3	57.5	42.38	63.14	70.12	77.2	71.88		53.13	71.33	68.27	76.84	6.68105e-09	5.15701e-06	0.000167648	1.35881e-06	2.82097e-07	5.14474e-08	1.88104e-07		1.33762e-05	2.135e-07	4.31915e-07	6.00341e-08	3	3	3	3	3	2	3		3
MHEDIEMTK	M1(Oxidation)	P31596	Excitatory amino acid transporter 2 OS=Rattus norvegicus GN=Slc1a2 PE=1 SV=2 - [EAA2_RAT]	1149.49	4.97159e+06	3.03989e+07	0	0	5.44073e+07	1.1371e+08	1.45212e+08	2.81421e+06	0	7.35087e+07	1.17363e+08	1.19985e+08	43.11	46.21		43.65	45.81	36.14	43.06	43.09		44.08	40.44	46.77	4.88652e-05	2.51298e-05		4.31519e-05	2.62422e-05	0.000267542	4.94311e-05	4.90908e-05		3.90841e-05	9.48832e-05	2.10378e-05	2	2		2	2	2	2	2
MHEDIEMTK		P31596	Excitatory amino acid transporter 2 OS=Rattus norvegicus GN=Slc1a2 PE=1 SV=2 - [EAA2_RAT]	1133.5	8.57424e+07	1.53668e+08	862170305	546341272	3.9135e+08	5.23023e+08	8.61618e+08	5.18408e+07	890125996	5.40698e+08	505200109	752755101	30.51	44.37	44.42	40.94	42.77	43.37	38.25	41.28	39.05	42.98	34.16	42.61	0.000978121	4.02154e-05	4.33692e-05	8.85916e-05	5.8129e-05	5.06282e-05	0.000179548	8.19205e-05	0.000149342	5.53851e-05	0.000422078	6.57932e-05	2	2	2	2	2	2	2	2	2
NLFPENLVQACFQQIQTVTKK	C11(Methylthio)	P31596	Excitatory amino acid transporter 2 OS=Rattus norvegicus GN=Slc1a2 PE=1 SV=2 - [EAA2_RAT]	2495.28	0	0	0	0	0	0	8.79894e+07	1.25707e+07	0	2.73141e+07	0	0							53.3	42.28		58.79									3.27415e-05	0.000428882		9.24907e-06									3	3
QLGPGKKNDEVSSLDAFLDLIR		P31596	Excitatory amino acid transporter 2 OS=Rattus norvegicus GN=Slc1a2 PE=1 SV=2 - [EAA2_RAT]	2415.29	0	0	5.71877e+07	0	0	2.49257e+07	0	0	2.89636e+07	5.44525e+06	3.95061e+07	2.85398e+07			86.47			86.38			85.99	73.23	70.68	75.01			1.03695e-08			1.08168e-08			1.18331e-08	2.32914e-07	4.06157e-07	1.48285e-07			3			3			3
SADCSVEEEPWKR	C4(Methylthio)	P31596	Excitatory amino acid transporter 2 OS=Rattus norvegicus GN=Slc1a2 PE=1 SV=2 - [EAA2_RAT]	1581.67	574919279	1.15556e+07	0	1.22364e+09	1303317392	3.75726e+08	659288247	1.15905e+08	1.59388e+09	1.13117e+09	9.19928e+08	1228618968	60.89	79		89.38	71.5	70.88	70.67	84.27	70.62	89.29	76.36	76.35	9.3691e-07	1.51071e-08		1.49949e-09	8.84932e-08	8.14648e-08	1.2427e-07	4.48933e-09	1.0837e-07	1.47201e-09	3.23689e-08	2.54913e-08	2	2		2	2	2	2	2	2
SELDTIDSQHR		P31596	Excitatory amino acid transporter 2 OS=Rattus norvegicus GN=Slc1a2 PE=1 SV=2 - [EAA2_RAT]	1300.61	0	0	228482157	159843779	0	2.66438e+08	2.42899e+08	0	3.57147e+08	1.68361e+08	1.26486e+08	1.47754e+08		53.6	84.68	78.77		64.2	75.11		85.35	85.47	71.49	81.72		9.16683e-06	6.80816e-09	2.78753e-08		7.60379e-07	6.47469e-08		6.1266e-09	5.95963e-09	1.49011e-07	1.41325e-08		3	2	2		2	2		2
TQSVYDDTK		P31596	Excitatory amino acid transporter 2 OS=Rattus norvegicus GN=Slc1a2 PE=1 SV=2 - [EAA2_RAT]	1056.48	0	0	0	9.5886e+06	0	1.55189e+07	2.79475e+07	0	1.77419e+07	1.62154e+07	16261127	1.25629e+07				41.72		44.22	42.15		31.4	32.37	49.68	45.66				0.000127866		7.00119e-05	0.000112764		0.00134021	0.00107194	1.99146e-05	5.02541e-05				2		2	2		2
TQSVYDDTKNHR		P31596	Excitatory amino acid transporter 2 OS=Rattus norvegicus GN=Slc1a2 PE=1 SV=2 - [EAA2_RAT]	1463.69	0	0	0	2.35714e+07	3.74657e+07	0	5.70663e+07	0	0	0	0	2.14096e+07				40.44	38.95		45.97					41.68				0.000343387	0.000490299		9.61133e-05					0.000264889				3	3		3
TSVNVVGDSFGAGIVYHLSK		P31596	Excitatory amino acid transporter 2 OS=Rattus norvegicus GN=Slc1a2 PE=1 SV=2 - [EAA2_RAT]	2050.06	0	0	0	6.32683e+07	0	0	1.22817e+08	1.08351e+08	0	0	0	0			59.7	80.54			95.77	69.18			51.72				7.17918e-06	5.29848e-08			1.66856e-09	7.06571e-07			3.93691e-05				3	3			3	3
VTLAANGK	N6(Deamidated)	P31596	Excitatory amino acid transporter 2 OS=Rattus norvegicus GN=Slc1a2 PE=1 SV=2 - [EAA2_RAT]	774.434	0	8.85076e+06	0	0	0	0	1.72823e+08	0	0	5.27632e+07	6.23928e+07	3.49005e+07	43.34	43.18					40.93			42.08	42.07	42.03	0.000333682	0.0003438					0.000573137			0.000439803	0.000443921	0.000448029	2	2					2
VTLAANGKSADCSVEEEPWKR	N6(Deamidated); C12(Methylthio)	P31596	Excitatory amino acid transporter 2 OS=Rattus norvegicus GN=Slc1a2 PE=1 SV=2 - [EAA2_RAT]	2337.08	6.89859e+07	0	0	5.17256e+07	70032791	0	4.10386e+07	6.59955e+07	4.97899e+07	76054805	4.70973e+07	45177059	41.55			46.66	37.29		33.39	79.05	73.63	81.6	35.91	57.02	0.000391912			0.000120834	0.000979849		0.0019471	6.96928e-08	2.42766e-07	3.90884e-08	0.00142329	1.142e-05	3			3	3		3	3	3
LVEDMENKIR		Q5XI32	F-actin-capping protein subunit beta OS=Rattus norvegicus GN=Capzb PE=1 SV=1 - [CAPZB_RAT]	1246.65	0	5.56799e+06	0	109549760	8.81422e+07	1.05718e+08	68115216	0	0	0	7.6116e+07	0	47.36	57.18		63.73	61.85	72.77	80.58		47.41		63.88	67.18	0.000123966	1.15812e-05		2.77486e-06	4.31066e-06	3.46132e-07	5.29365e-08		0.000102577		2.72158e-06	1.27298e-06	3	2		2	2	2	2		3
RLPPQQIEK		Q5XI32	F-actin-capping protein subunit beta OS=Rattus norvegicus GN=Capzb PE=1 SV=1 - [CAPZB_RAT]	1108.65	0	0	0	0	44752182	4.72395e+07	0	0	0	0	0	0					31.43	30.1			33.78								0.00115112	0.00161244			0.000711949								2	2			2
SKQEALKNDLVEALKR		Q5XI32	F-actin-capping protein subunit beta OS=Rattus norvegicus GN=Capzb PE=1 SV=1 - [CAPZB_RAT]	1842.04	0	0	0	0	2.95032e+07	0	0	0	34933096	0	2.30505e+07	20127322			38.53	40.73	38.5				45.32		45.53	40.19			0.000287577	0.000253584	0.000487325				8.81295e-05		8.25699e-05	0.000335018			3	3	4				4
STLNEIYFGK		Q5XI32	F-actin-capping protein subunit beta OS=Rattus norvegicus GN=Capzb PE=1 SV=1 - [CAPZB_RAT]	1171.6	0	0	69577778	0	0	0	68377841	0	5.7801e+07	0	0	0			49.21				49.27		49.31						3.3586e-05				4.79132e-05		4.74739e-05						2				2		2
TKDIVNGLR	N6(Deamidated)	Q5XI32	F-actin-capping protein subunit beta OS=Rattus norvegicus GN=Capzb PE=1 SV=1 - [CAPZB_RAT]	1016.57	0	5.58476e+06	33831457	2.84786e+07	29837993	3.95996e+07	3.5866e+07	0	5.49483e+07	2.73397e+07	0	2.06419e+07		43.97	39.55	39.33	34.4	43.93	40.79		39.77	40.33		38.61		0.000204442	0.000565679	0.000595073	0.0018517	0.000206334	0.000425177		0.000537737	0.000472683		0.000702377		2	2	2	2	2	2		2
SLYQPGGVAPESLEYIEAHGTGTK		P12785	Fatty acid synthase OS=Rattus norvegicus GN=Fasn PE=1 SV=3 - [FAS_RAT]	2504.21	0	0	4.47379e+07	0	0	22902136	50080347	0	0	2.42358e+07	0	0			55.69			31.99	46.02			52.14					2.30657e-05			0.00588143	0.000221281			5.40684e-05					3			3	3
WLSTSIPEAQWQSSLAR		P12785	Fatty acid synthase OS=Rattus norvegicus GN=Fasn PE=1 SV=3 - [FAS_RAT]	1959.99	0	0	71375320	5.31581e+07	0	3.78305e+07	0	0	0	5.037e+07	2.25792e+07	3.95518e+07			84.25	43.72		60.82				86.34	48.31	68.87			2.79999e-08	0.000299357		5.87839e-06				1.64914e-08	0.000104775	9.20997e-07			2	2		2
AAQEEYIKR		P05065	Fructose-bisphosphate aldolase A OS=Rattus norvegicus GN=Aldoa PE=1 SV=2 - [ALDOA_RAT]	1107.58	8.50023e+06	0	0	0	0	68144915	0	2.19057e+06	0	0	0	0	43.11					37.3		71.48					0.000185688					0.000819318		3.20046e-07					2					2		2
ALANSLACQGK	C8(Methylthio)	P05065	Fructose-bisphosphate aldolase A OS=Rattus norvegicus GN=Aldoa PE=1 SV=2 - [ALDOA_RAT]	1121.54	0	1.32373e+08	7.13557e+08	0	0	3.53261e+08	483177858	0	0	3.6097e+08	3.84068e+08	3.58278e+08		70.01	69.87			67	67.02			66.93	66.94	66.97		5.13816e-07	4.22458e-07			1.01758e-06	1.01291e-06			1.04426e-06	1.04185e-06	1.02464e-06		2	2			2	2
ALQASALK		P05065	Fructose-bisphosphate aldolase A OS=Rattus norvegicus GN=Aldoa PE=1 SV=2 - [ALDOA_RAT]	801.482	0	1.25932e+07	0	4.55458e+07	0	0	75933221	1.37232e+06	0	3.47036e+07	4.3991e+07	3.42554e+07		47.6		36.79			39.84	33.69		35.99	35.55	40.84		7.12498e-05		0.000858586			0.000425387	0.00175301		0.00103225	0.00114231	0.000337897		2		2			2	2
ELADIAHR		P05065	Fructose-bisphosphate aldolase A OS=Rattus norvegicus GN=Aldoa PE=1 SV=2 - [ALDOA_RAT]	924.489	0	6.30733e+07	5.56542e+08	382619633	3.36519e+08	421240146	5.73357e+08	1.09219e+07	7.69781e+08	3.53693e+08	2.74392e+08	3.06689e+08		75.76	70.96	71	70.94	71.34	65.82	70.98	67.11	75.75	75.8	67.2		6.50378e-08	1.96411e-07	1.9461e-07	1.97318e-07	1.79956e-07	6.41455e-07	1.95509e-07	4.76613e-07	6.78485e-08	6.44416e-08	4.66838e-07		2	2	2	2	2	2	2	2
FSNEEIAMATVTALRR	M8(Oxidation)	P05065	Fructose-bisphosphate aldolase A OS=Rattus norvegicus GN=Aldoa PE=1 SV=2 - [ALDOA_RAT]	1824.93	0	0	59794680	0	34810910	0	0	0	0	0	50448310	0			34.12		33.58						32.25				0.00234291		0.00241192						0.00366332				3		3
FSNEEIAMATVTALRR		P05065	Fructose-bisphosphate aldolase A OS=Rattus norvegicus GN=Aldoa PE=1 SV=2 - [ALDOA_RAT]	1808.93	0	0	4.18177e+08	3.22036e+08	1.9735e+08	0	5.96849e+08	3.59562e+08	3.36386e+08	2.61577e+08	2.97465e+08	262704352			51.32	48.94	48.05		51.78	51.82	44.44	58.51	51.36	41.58			4.87017e-05	8.10539e-05	0.000100272		4.24796e-05	4.20901e-05	0.00023024	8.5262e-06	4.60618e-05	0.000455241			3	3	3		3	3	3
GILAADESTGSIAK		P05065	Fructose-bisphosphate aldolase A OS=Rattus norvegicus GN=Aldoa PE=1 SV=2 - [ALDOA_RAT]	1332.7	0	18835550	0	8.11409e+07	5.35893e+07	9.18671e+07	0	5.00078e+07	0	9.46943e+07	7.86405e+07	97100676		76.29		42.34	90.37	82.68		81.87		95.49	100.38	105.81		1.10433e-07		0.000280054	4.31616e-09	2.5357e-08		3.05561e-08		1.35594e-09	4.39786e-10	1.23338e-10		2		2	2	2		2
GILAADESTGSIAKR		P05065	Fructose-bisphosphate aldolase A OS=Rattus norvegicus GN=Aldoa PE=1 SV=2 - [ALDOA_RAT]	1488.8	0	3345927	176260485	9.98104e+07	9.48829e+07	1.15057e+08	144152316	6.81783e+07	1.83774e+08	95325664	1.0185e+08	136141253		61.94	121.63	105.11	104.94	105.13	101.77	105.19	105.09	103.96	95.38	107.16		3.96636e-06	3.77888e-12	1.49535e-10	1.53901e-10	1.59589e-10	3.62574e-10	1.64967e-10	1.76553e-10	2.18976e-10	1.40521e-09	1.01924e-10		2	2	2	2	2	2	2	2
IGEHTPSSLAIMENANVLAR		P05065	Fructose-bisphosphate aldolase A OS=Rattus norvegicus GN=Aldoa PE=1 SV=2 - [ALDOA_RAT]	2123.09	0	0	0	0	0	1.72386e+08	0	0	1.34413e+08	1.52584e+08	1.73338e+08	0					33.19	75.7			88.32	83.18	46.08	31.55					0.00393381	2.22052e-07			1.21466e-08	3.94288e-08	0.00019605	0.00601864					2	3			3
IVAPGKGILAADESTGSIAK		P05065	Fructose-bisphosphate aldolase A OS=Rattus norvegicus GN=Aldoa PE=1 SV=2 - [ALDOA_RAT]	1898.06	0	0	0	0	9.04697e+08	0	4.74109e+08	3.37476e+07	0	0	457915572	702268193		61.33		71.9	73.95	79.1	87.45	88.86	70.15	67.51	89.97	90.24		2.46629e-06		2.22751e-07	1.24842e-07	4.24443e-08	6.11616e-09	4.48559e-09	3.28457e-07	5.94353e-07	3.27253e-09	3.16989e-09		3		3	2	3	2	2	3
IVAPGKGILAADESTGSIAKR		P05065	Fructose-bisphosphate aldolase A OS=Rattus norvegicus GN=Aldoa PE=1 SV=2 - [ALDOA_RAT]	2054.15	0	0	0	5.49158e+08	0	448635731	0	0	3.73289e+08	455388063	3.84391e+08	5.57674e+08				72.75		63.22		46.68	66.18	66.05	59.62	77.24				1.19449e-07		1.09579e-06		4.83262e-05	5.30179e-07	5.58705e-07	1.69173e-06	4.43678e-08				3		3		4	3
KELADIAHR		P05065	Fructose-bisphosphate aldolase A OS=Rattus norvegicus GN=Aldoa PE=1 SV=2 - [ALDOA_RAT]	1052.58	6.95288e+06	0	98410759	24409455	4.67033e+07	46551322	4.16635e+07	0	9.65442e+07	4.36039e+07	0	3.75642e+07	66.4		69.73	70.16	79.97	72.89	67.46		70.56	69.94	50.68	67.72	5.269e-07		2.34111e-07	2.12042e-07	2.21525e-08	1.1309e-07	3.94841e-07		2.24151e-07	2.23061e-07	1.9239e-05	3.71897e-07	2		2	2	2	2	2		2
LQSIGTENTEENRR		P05065	Fructose-bisphosphate aldolase A OS=Rattus norvegicus GN=Aldoa PE=1 SV=2 - [ALDOA_RAT]	1646.81	0	4.27204e+07	1.05243e+08	6.88361e+07	0	0	0	0	0	9.88194e+07	65708452	0		31.31	47.2	32.79					37.3	38.94	34.34			0.00454857	0.000117186	0.00341911					0.00112656	0.000772245	0.00226399			3	3	3					2
PHPYPALTPEQK		P05065	Fructose-bisphosphate aldolase A OS=Rattus norvegicus GN=Aldoa PE=1 SV=2 - [ALDOA_RAT]	1377.72	0	1.25114e+07	0	218476282	1.89493e+07	1.51639e+08	3.36067e+08	0	4.33568e+08	9.37831e+07	133709048	0		49.32	42.53	47.52	43.26	33.86	47.8		42.03	41.28	44.18			5.32122e-05	0.000265273	8.40802e-05	0.000228951	0.00195296	7.96602e-05		0.000285109	0.000338853	0.00020434			2	2	2	2	2	2		2
PHPYPALTPEQKK		P05065	Fructose-bisphosphate aldolase A OS=Rattus norvegicus GN=Aldoa PE=1 SV=2 - [ALDOA_RAT]	1505.81	0	16914127	1027224344	0	0	0	148583448	2.71484e+07	0	471242413	0	6.36464e+08		30.82	39.77	46.51	51.12	51.27	42.3	39.85	55.07	37.37	54.45	42.84		0.00368434	0.000442842	9.9394e-05	3.24526e-05	3.3217e-05	0.000238482	0.000455463	1.36916e-05	0.000806218	1.5972e-05	0.000228798		3	3	2	2	2	3	3	2
SKGGVVGIKVDKGVVPLAGTNGETTTQGLDGLSER	N21(Deamidated)	P05065	Fructose-bisphosphate aldolase A OS=Rattus norvegicus GN=Aldoa PE=1 SV=2 - [ALDOA_RAT]	3440.83	0	0	0	6.32755e+07	1.30059e+08	5.61748e+07	0	1.59197e+08	0	0	0	9.60565e+07				55.7	49.22	37.7		44.62				35.05				1.13044e-05	6.22305e-05	0.000730245		0.000160492				0.00142237				4	4	4		4
ALQASALSAWR		P09117	Fructose-bisphosphate aldolase C OS=Rattus norvegicus GN=Aldoc PE=1 SV=3 - [ALDOC_RAT]	1173.64	0	0	0	6.9635e+07	0	47489411	0	3.22465e+07	0	0	0	0				81		75.06		67.92								5.87803e-08		1.71539e-07		8.87897e-07								2		2		2
CSLPRPWALTFSYGR	C1(Methylthio)	P09117	Fructose-bisphosphate aldolase C OS=Rattus norvegicus GN=Aldoc PE=1 SV=3 - [ALDOC_RAT]	1799.87	0	0	0	0	0	0	0	0	0	0	9.46184e+06	2.16104e+07										33.61	38.03	33.9										0.00230821	0.000826341	0.00217948
DNAGAATEEFIKR		P09117	Fructose-bisphosphate aldolase C OS=Rattus norvegicus GN=Aldoc PE=1 SV=3 - [ALDOC_RAT]	1421.7	0	4.28782e+06	3.05608e+07	0	0	0	0	1.42566e+07	0	0	0	0		84.05	76.21					84.93						1.79065e-08	1.08896e-07					1.46222e-08						2	2					2
ELSDIALR		P09117	Fructose-bisphosphate aldolase C OS=Rattus norvegicus GN=Aldoc PE=1 SV=3 - [ALDOC_RAT]	916.51	0	3.57605e+07	1.06069e+08	1.28017e+08	9.19642e+07	1.63083e+08	1.70085e+08	0	0	141100388	7.55191e+07	9.18508e+07		58.86	53.88	59.21	45.32	58.74	45.55			45.41	47.76	58.86		8.77614e-06	2.70112e-05	7.9167e-06	0.000210042	8.35372e-06	0.000224283			0.000189908	0.000105521	8.77614e-06		2	2	2	2	2	2
GILAADESVGSMAKR		P09117	Fructose-bisphosphate aldolase C OS=Rattus norvegicus GN=Aldoc PE=1 SV=3 - [ALDOC_RAT]	1504.79	0	0	0	1.09046e+07	0	1.30027e+07	0	5.546e+06	0	0	0	0				93.23		79.5		46.38								2.70941e-09		6.67601e-08		0.000139237								2		2		2
ISDRTPSALAILENANVLAR		P09117	Fructose-bisphosphate aldolase C OS=Rattus norvegicus GN=Aldoc PE=1 SV=3 - [ALDOC_RAT]	2124.18	0	0	2.9217e+08	2.3546e+08	0	139248870	252957380	0	2.24202e+08	1.24674e+08	144427642	1.17053e+08			116.22	104.9	70.32	103.06	76.8		80.02	114.54	111.72	98.42			6.3277e-12	8.73703e-11	2.50821e-07	1.33464e-10	5.32771e-08		2.98622e-08	9.49213e-12	2.18717e-11	4.3164e-10			2	2	3	2	2		2
IVAPGKGILAADESVGSMAK		P09117	Fructose-bisphosphate aldolase C OS=Rattus norvegicus GN=Aldoc PE=1 SV=3 - [ALDOC_RAT]	1914.04	8.77753e+06	0	0	4.20249e+08	6.00273e+08	0	281198102	0	0	3.41786e+08	379979068	0	70.53		87.21	85.57	110.35	92.09	96.56	75.31	96.07	83.74	86.43	103.92	4.11579e-07		7.98453e-09	1.37279e-08	4.10544e-11	2.96648e-09	9.27362e-10	1.31027e-07	1.26058e-09	1.88088e-08	1.01242e-08	1.92617e-10	2		3	2	2	3	2	3	3
IVAPGKGILAADESVGSMAKR		P09117	Fructose-bisphosphate aldolase C OS=Rattus norvegicus GN=Aldoc PE=1 SV=3 - [ALDOC_RAT]	2070.13	0	0	1.0237e+08	0	149248338	0	0	0	0	4.01073e+07	0	0			72.63		76.56					55.15					2.21032e-07		9.60482e-08					1.23724e-05					3		3
KELSDIALR		P09117	Fructose-bisphosphate aldolase C OS=Rattus norvegicus GN=Aldoc PE=1 SV=3 - [ALDOC_RAT]	1044.61	0	0	0	0	0	0	2.53482e+07	0	0	2.72524e+07	0	2.67894e+07							42.82			59.42		51.41							0.00028993			6.40012e-06		4.01137e-05							2
LSQIGVENTEENRR		P09117	Fructose-bisphosphate aldolase C OS=Rattus norvegicus GN=Aldoc PE=1 SV=3 - [ALDOC_RAT]	1644.83	0	6.10835e+06	34717124	0	0	3.01076e+07	0	1.06729e+07	0	3.48786e+07	0	3.62841e+07		47.38	31.52			43.75		47.22		35.16		34.69		9.32331e-05	0.00359393			0.000215065		9.6732e-05		0.00156967		0.00173209		3	3			3		3
PHSYPALSAEQK		P09117	Fructose-bisphosphate aldolase C OS=Rattus norvegicus GN=Aldoc PE=1 SV=3 - [ALDOC_RAT]	1327.67	0	0	0	0	0	1.17183e+07	2.78931e+07	0	2.9628e+07	0	0	0						44.55	34.66		33.38									0.000128024	0.00121403		0.00167607									2	2		2
PHSYPALSAEQKK		P09117	Fructose-bisphosphate aldolase C OS=Rattus norvegicus GN=Aldoc PE=1 SV=3 - [ALDOC_RAT]	1455.76	3.26985e+07	1.64513e+07	3.84981e+08	0	0	0	1.39289e+08	5.68121e+06	1.39845e+08	0	0	0	69.82	68.96	41.72				52.69	61.59	62.09				4.53408e-07	6.35287e-07	0.00028938				2.28765e-05	2.87772e-06	2.75017e-06				3	3	3				3	3	3
PHSYPALSAEQKKELSDIALR		P09117	Fructose-bisphosphate aldolase C OS=Rattus norvegicus GN=Aldoc PE=1 SV=3 - [ALDOC_RAT]	2353.25	0	0	355043053	207305157	584978060	0	0	0	8.72009e+07	1.87524e+08	2.33877e+08	1.95005e+08			46.56	58.29	58.28	42.86			67.49	62.6	81.25	33.6			0.000138	9.26574e-06	8.76702e-06	0.000318328			1.11399e-06	3.37968e-06	4.61185e-08	0.00272822			3	3	3	4			3
RAEMNGLAAQGK	N5(Deamidated)	P09117	Fructose-bisphosphate aldolase C OS=Rattus norvegicus GN=Aldoc PE=1 SV=3 - [ALDOC_RAT]	1246.62	0	0	0	0	0	0	1.99274e+07	0	2.14981e+07	0	5.38044e+06	1.00341e+07				32.97			54.24		36.96		39.75	35.16				0.00239714			1.78934e-05		0.000956519		0.000476664	0.00144775				2			2		2
AAAEVNQEYGLDPK		P14408	Fumarate hydratase, mitochondrial OS=Rattus norvegicus GN=Fh PE=1 SV=1 - [FUMH_RAT]	1504.73	0	0	0	56804471	0	6.8172e+07	0	1.48299e+07	0	0	4.09598e+07	6.03747e+07				35.99		31.46		35.15			32.63	39.15				0.00100707		0.00267936		0.00120669			0.00207388	0.000474313				2		2		2
AFGILKR		P14408	Fumarate hydratase, mitochondrial OS=Rattus norvegicus GN=Fh PE=1 SV=1 - [FUMH_RAT]	804.508	0	0	3.46432e+08	2.38797e+08	205719126	189755154	170518367	5.94436e+06	2.27737e+08	1.19139e+08	1.79233e+08	1.6237e+08			47.09	42.43	50.13	47.19	45.22	36.79	47.26	47.24	47.17	47.74			2.73608e-05	8.0007e-05	1.35871e-05	2.67379e-05	4.20851e-05	0.000293176	2.63104e-05	2.07679e-05	2.68614e-05	2.35574e-05			2	2	2	2	2	2	2
FLGSGPR		P14408	Fumarate hydratase, mitochondrial OS=Rattus norvegicus GN=Fh PE=1 SV=1 - [FUMH_RAT]	733.399	0	0	0	9.49114e+07	0	8.84267e+07	0	2.62151e+06	4.59595e+07	0	0	0				30.98		46.81		39.41	35.22							0.00343138		8.96331e-05		0.000492571	0.00129261							2		2		2	2
IANDIRFLGSGPR		P14408	Fumarate hydratase, mitochondrial OS=Rattus norvegicus GN=Fh PE=1 SV=1 - [FUMH_RAT]	1415.78	0	0	0	0	0	1.89236e+07	0	0	19057946	16576651	0	0						33.71			39.19	30.51								0.00206415			0.000530216	0.00475723								3			3
IASAIMK		P14408	Fumarate hydratase, mitochondrial OS=Rattus norvegicus GN=Fh PE=1 SV=1 - [FUMH_RAT]	733.427	6.08541e+06	0	9.86137e+07	0	0	0	0	0	146447798	112600298	1.72351e+08	1.34256e+08	44.57		45.83						45.12	38.67	43.92	42.3	7.85566e-05		5.87736e-05						6.92122e-05	0.000305621	9.52945e-05	0.000138378	2		2						2
INKLMNESLMLVTALNPHIGYDK		P14408	Fumarate hydratase, mitochondrial OS=Rattus norvegicus GN=Fh PE=1 SV=1 - [FUMH_RAT]	2614.37	0	0	1.99456e+08	1.35725e+08	7.56253e+07	4.90357e+07	126904573	4.68583e+07	0	9.81153e+07	1.22764e+08	125833874			73.96	67.65	103.85	87.98	61.82	81.86		87.79	81.49	77.44			2.27012e-07	1.03075e-06	2.32835e-10	8.91637e-09	3.97883e-06	3.64912e-08		9.89731e-09	4.11555e-08	1.08181e-07			3	3	3	3	3	3
INKLMNESLMLVTALNPHIGYDKAAK		P14408	Fumarate hydratase, mitochondrial OS=Rattus norvegicus GN=Fh PE=1 SV=1 - [FUMH_RAT]	2884.55	0	0	0	0	4.34887e+07	0	0	2.07372e+07	0	0	0	3.02692e+07					40.88			49.58				55.25					0.000375628			5.12216e-05				1.3285e-05					4			4
IYELAAGGTAVGTGLNTR		P14408	Fumarate hydratase, mitochondrial OS=Rattus norvegicus GN=Fh PE=1 SV=1 - [FUMH_RAT]	1763.93	0	0	0	4.39796e+07	0	2.74913e+07	62459326	3.85526e+07	5.60111e+07	2.83385e+07	4.20351e+07	5.04245e+07				77.79		70.43	65.96	98.76	94.3	39.55	68.87	112.65				9.48145e-08		5.0721e-07	1.53375e-06	7.51707e-10	2.00629e-09	0.000621138	7.39392e-07	3.09653e-11				2		2	2	2	2
KTAIELGYLTAEQFDEWVKPK		P14408	Fumarate hydratase, mitochondrial OS=Rattus norvegicus GN=Fh PE=1 SV=1 - [FUMH_RAT]	2466.29	0	0	1.11021e+08	9.2854e+07	1.24434e+08	4.40291e+07	1.2549e+08	165228597	1.00613e+08	0	1.08461e+08	141517941			94.5	85.11	98.68	94.8	90.21	88.25	88.26	50.75	90.33	91.21			2.46595e-09	2.05032e-08	8.74097e-10	2.31792e-09	6.33609e-09	9.94997e-09	1.00017e-08	5.51114e-05	6.11708e-09	5.07078e-09			3	3	3	3	3	3	3
LHDALSAK		P14408	Fumarate hydratase, mitochondrial OS=Rattus norvegicus GN=Fh PE=1 SV=1 - [FUMH_RAT]	854.473	0	1.84048e+07	0	0	0	2.9217e+07	0	0	0	0	4.94506e+07	0		33.01				42.94					41.24			0.000775054				7.87647e-05					0.000116502			2				2
LMNESLMLVTALNPHIGYDK		P14408	Fumarate hydratase, mitochondrial OS=Rattus norvegicus GN=Fh PE=1 SV=1 - [FUMH_RAT]	2259.15	0	0	7.60988e+07	0	0	0	1.06433e+08	2.90013e+07	0	3.09213e+07	0	5.26759e+07			77.76				82	55.26	42.99	75		75.52			1.53257e-07				5.96255e-08	2.8147e-05	0.000447085	2.60888e-07		2.49684e-07			3				3	3	2
MPIPVIK		P14408	Fumarate hydratase, mitochondrial OS=Rattus norvegicus GN=Fh PE=1 SV=1 - [FUMH_RAT]	797.495	0	2.10207e+07	2.63576e+08	1.90572e+08	160973386	0	2.83962e+08	0	265371646	1.4141e+08	2.41017e+08	1.5264e+08		33.6	32.99	33.65	33.54		33.03		33.67	32.91	33.59	34.34		0.000436516	0.000502343	0.000430497	0.000442588		0.000497737		0.000428519	0.000511682	0.000436486	0.000368129		2	2	2	2		2		2
SKEFAQVIK		P14408	Fumarate hydratase, mitochondrial OS=Rattus norvegicus GN=Fh PE=1 SV=1 - [FUMH_RAT]	1049.6	0	3.01001e+07	0	0	0	98667939	0	1.45814e+07	0	0	0	0		31.53				30.48		37.7						0.00203891				0.00259656		0.000492491						2				2		2
TAIELGYLTAEQFDEWVKPK		P14408	Fumarate hydratase, mitochondrial OS=Rattus norvegicus GN=Fh PE=1 SV=1 - [FUMH_RAT]	2338.19	0	0	1.44872e+08	159853475	1.94081e+08	100126496	175439015	1.05333e+08	1.98375e+08	0	1.37896e+08	2.83841e+08			80.24	76.57	75.72	70.99	76.68	45.62	84.57		59.86	69.36			7.71183e-08	1.83944e-07	2.12994e-07	6.4887e-07	1.8364e-07	0.00022618	2.75821e-08		8.41701e-06	9.90755e-07			3	3	3	3	3	3	3
TAIELGYLTAEQFDEWVKPKDMLGPK		P14408	Fumarate hydratase, mitochondrial OS=Rattus norvegicus GN=Fh PE=1 SV=1 - [FUMH_RAT]	2979.51	0	0	0	0	1.02997e+08	0	0	0	0	0	2.80173e+07	3.35418e+07					77.86						78.88	41.39					1.45677e-07						1.06771e-07	0.000631712					3
TAIELGYLTAEQFDEWVKPKDMLGPK	M22(Oxidation)	P14408	Fumarate hydratase, mitochondrial OS=Rattus norvegicus GN=Fh PE=1 SV=1 - [FUMH_RAT]	2995.51	0	0	0	0	126308062	6.08319e+07	0	0	0	0	7.3703e+07	0			34.39		33.91	32.91					33.43				0.0034208		0.0037596	0.00478423					0.00438054				3		3	3
ALAAQLPLIPR		B2RYW9	Fumarylacetoacetate hydrolase domain-containing protein 2 OS=Rattus norvegicus GN=Fahd2 PE=1 SV=1 - [FAHD2_RAT]	1162.73	0	0	66456141	1.06788e+08	8.2179e+07	9.67798e+07	1.26942e+08	0	0	5.42081e+07	1.05928e+08	23413067			54.81	56.53	56.31	54.73	68.15			56.84	62.53	75.78			3.29587e-06	2.21804e-06	2.3333e-06	3.35714e-06	1.52746e-07			2.06524e-06	5.57147e-07	2.63615e-08			2	2	2	2	2
RALAAQLPLIPR		B2RYW9	Fumarylacetoacetate hydrolase domain-containing protein 2 OS=Rattus norvegicus GN=Fahd2 PE=1 SV=1 - [FAHD2_RAT]	1318.83	0	0	0	9.58232e+07	0	0	44686712	0	84441548	54233609	0	6.43292e+07			64.16	49.76	65.71		41.49		51.81	44.42		44.33			3.82798e-07	1.05431e-05	2.67898e-07		7.07897e-05		6.57612e-06	3.60554e-05		3.68104e-05			2	3	2		3		3
TFDTFCPLGPALVTK	C6(Methylthio)	B2RYW9	Fumarylacetoacetate hydrolase domain-containing protein 2 OS=Rattus norvegicus GN=Fahd2 PE=1 SV=1 - [FAHD2_RAT]	1655.82	0	0	3.22281e+07	0	0	0	5.48197e+07	0	3.94727e+07	11955154	0	0			36.24				41.44		34.98	37.99					0.00122407				0.000412732		0.00154078	0.000818102					2				2		2
TMVQFLER		B2RYW9	Fumarylacetoacetate hydrolase domain-containing protein 2 OS=Rattus norvegicus GN=Fahd2 PE=1 SV=1 - [FAHD2_RAT]	1023.53	0	0	6.82554e+07	30609706	37395036	30003609	4.93125e+07	0	41197563	21425189	37629045	3.752e+07			45.75	46.83	46.66	43.72	43.89		44.98	45.15	45.2	51.75			8.11521e-05	7.67718e-05	8.4152e-05	0.000165602	0.00015312		0.000123898	0.000106922	0.000117778	2.3392e-05			2	2	2	2	2		2
TMVQFLERGETALSVAR		B2RYW9	Fumarylacetoacetate hydrolase domain-containing protein 2 OS=Rattus norvegicus GN=Fahd2 PE=1 SV=1 - [FAHD2_RAT]	1908	0	0	0	0	0	0	1.90335e+07	6.36058e+07	0	0	0	0							35.94	58.97			45.68								0.0014899	8.17635e-06			0.000178461								3	3
AAVPSGASTGIYEALELRDGDKQR		P07323	Gamma-enolase OS=Rattus norvegicus GN=Eno2 PE=1 SV=2 - [ENOG_RAT]	2504.27	0	0	9.45199e+07	1.35491e+08	169206497	1.45506e+08	8.64891e+07	0	0	1.09499e+08	6.76159e+07	9.00584e+07			46.23	52.92	52.07	56.92	53.01		46.47	53.93	51.52	55.31			0.000197733	4.39034e-05	5.4326e-05	1.68686e-05	4.3503e-05		0.000193865	3.47935e-05	5.77848e-05	2.44387e-05			4	4	4	4	4		3
AGAAEKDLPLYR		P07323	Gamma-enolase OS=Rattus norvegicus GN=Eno2 PE=1 SV=2 - [ENOG_RAT]	1303.7	0	0	50262388	0	4.8311e+07	0	26504006	0	0	0	0	0			55.49		48.01		53.23		56.66						1.38419e-05		8.22249e-05		2.32914e-05		1.07887e-05						2		2		2		3
CITGDQLGALYQDFVR	C1(Methylthio)	P07323	Gamma-enolase OS=Rattus norvegicus GN=Eno2 PE=1 SV=2 - [ENOG_RAT]	1844.87	0	0	122821146	1.26908e+08	1.16004e+08	1.01215e+08	6.6834e+07	0	0	6.39557e+07	6.26211e+07	136745234			80.59	79.86	88.07	89.5	92.91			37.74	79.58	101.06			3.49189e-08	4.13105e-08	6.23821e-09	4.31977e-09	2.04673e-09			0.00067307	4.40616e-08	3.0162e-10			2	2	2	2	2
GNPTVEVDLHTAK		P07323	Gamma-enolase OS=Rattus norvegicus GN=Eno2 PE=1 SV=2 - [ENOG_RAT]	1380.71	0	0	0	0	0	1.14179e+08	1.59819e+08	0	0	9.77196e+07	8.38875e+07	8.38886e+07						70.47	38.17			49.84	32.34	53.71						3.58972e-07	0.000609621			4.25387e-05	0.00233378	1.78751e-05						2	2
IEEELGEEAR		P07323	Gamma-enolase OS=Rattus norvegicus GN=Eno2 PE=1 SV=2 - [ENOG_RAT]	1174.56	0	9.97171e+06	0	11570091	0	5.14126e+07	0	0	0	0	11866324	0		80.34		32.53		40.44					57.39			2.72786e-08		0.00170333		0.000271095					5.47169e-06			2		2		2
LGAEVYHTLK		P07323	Gamma-enolase OS=Rattus norvegicus GN=Eno2 PE=1 SV=2 - [ENOG_RAT]	1130.62	0	0	1.13793e+08	51781175	0	0	6.19694e+07	0	6.46612e+07	0	0	0			55.39	49.02	38.31	40.74	49.2		49.18						1.47425e-05	7.83213e-05	0.000922317	0.000527084	7.51415e-05		7.54884e-05						2	2	3	3	2		2
YLGKGVLK		P07323	Gamma-enolase OS=Rattus norvegicus GN=Eno2 PE=1 SV=2 - [ENOG_RAT]	877.551	0	0	0	0	9.33905e+07	5.5854e+07	2.71332e+07	0	0	26724165	3.8622e+07	3.21338e+07					34.28	31.62	33.88			32.33	35.55	35.49					0.000372366	0.000687021	0.000408291			0.000583405	0.000277952	0.000281819					2	2	2
YNQLMR		P07323	Gamma-enolase OS=Rattus norvegicus GN=Eno2 PE=1 SV=2 - [ENOG_RAT]	824.408	4.02691e+06	11662754	0	0	23141569	3.06601e+07	0	0	3.71155e+07	2.90193e+07	0	2.81087e+07	33.56	33.09			34.17	34.79			36.7	37.47		37.48	0.000528666	0.000589089			0.00045939	0.000398273			0.000256555	0.000214873		0.000214379	2	2			2	2			2
YNQLMRIEEELGEEAR		P07323	Gamma-enolase OS=Rattus norvegicus GN=Eno2 PE=1 SV=2 - [ENOG_RAT]	1979.95	0	0	22286751	0	0	0	0	0	0	1.32432e+07	9855044	1.13797e+07			54.8							64	37.73	30.12			1.904e-05							2.34883e-06	0.00102036	0.0055933			3
CAVVDVPFGGAK	C1(Methylthio)	P10860	Glutamate dehydrogenase 1, mitochondrial OS=Rattus norvegicus GN=Glud1 PE=1 SV=2 - [DHE3_RAT]	1208.58	0	0	63608580	6.33523e+07	5.06769e+07	0	7.59197e+07	0	6.78689e+07	3.98222e+07	0	4.27647e+07			50.17	49.82	54.86		54.82		50.38	49.66		49.48			4.03877e-05	4.48196e-05	1.37167e-05		1.41732e-05		3.93975e-05	4.65017e-05		4.50879e-05			2	2	2		2		2
FTMELAK		P10860	Glutamate dehydrogenase 1, mitochondrial OS=Rattus norvegicus GN=Glud1 PE=1 SV=2 - [DHE3_RAT]	839.431	0	4091916	0	0	0	0	0	0	0	14695908	1.09159e+07	0		31.41								39.96	30.93			0.00191534								0.000156434	0.00181628			2
GASIVEDKLVEDLKTR		P10860	Glutamate dehydrogenase 1, mitochondrial OS=Rattus norvegicus GN=Glud1 PE=1 SV=2 - [DHE3_RAT]	1772.98	0	0	0	1.90886e+07	0	0	5.75473e+07	0	4.71723e+07	0	0	0				54.32			70.43		71.43							1.59026e-05			3.62293e-07		2.94974e-07							3			3		3
IIAEGANGPTTPEADKIFLER	N7(Deamidated)	P10860	Glutamate dehydrogenase 1, mitochondrial OS=Rattus norvegicus GN=Glud1 PE=1 SV=2 - [DHE3_RAT]	2243.16	3.20806e+07	0	0	0	0	9.31779e+07	2.49058e+07	0	0	62985585	0	6.75236e+07	84.82					62.44	32.22			45.27		58.44	2.88408e-08					4.93192e-06	0.00518819			0.000242191		1.21736e-05	3					3	3
ISGASEKDIVHSGLAYTMER		P10860	Glutamate dehydrogenase 1, mitochondrial OS=Rattus norvegicus GN=Glud1 PE=1 SV=2 - [DHE3_RAT]	2164.07	0	0	0	0	3.96147e+07	0	0	53783930	0	0	3.70088e+07	0					38.28			76.12			69.67						0.00109216			1.83257e-07			7.82236e-07						3			3
MVEGFFDR		P10860	Glutamate dehydrogenase 1, mitochondrial OS=Rattus norvegicus GN=Glud1 PE=1 SV=2 - [DHE3_RAT]	1000.45	0	0	5.98256e+07	2.99693e+07	0	25457387	53840695	0	5.12602e+07	26971505	5.7007e+07	4.64503e+07			53.44	49.91		48.89	46.17		50.73	46.4	43.21	45.34			8.60505e-06	1.93979e-05		2.25963e-05	3.98551e-05		1.22565e-05	4.46719e-05	9.31182e-05	5.55589e-05			2	2		2	2		2
NYTDNELEKITR		P10860	Glutamate dehydrogenase 1, mitochondrial OS=Rattus norvegicus GN=Glud1 PE=1 SV=2 - [DHE3_RAT]	1495.74	0	0	22808460	0	3.11665e+07	0	0	0	0	0	0	0			49.83		68.26							40.85			5.09561e-05		6.94149e-07							0.000402899			2		2
FLIEACK	C6(Methylthio)	P13264	Glutaminase kidney isoform, mitochondrial OS=Rattus norvegicus GN=Gls PE=1 SV=2 - [GLSK_RAT]	869.423	0	0	0	0	0	0	2.23956e+07	0	1.58521e+07	5.74418e+06	1.00056e+07	0							45.73		45.77	45.88	45.39								4.81141e-05		4.7673e-05	4.77718e-05	5.63683e-05								2		2
FSPDLWGVSVCTVDGQR	C11(Methylthio)	P13264	Glutaminase kidney isoform, mitochondrial OS=Rattus norvegicus GN=Gls PE=1 SV=2 - [GLSK_RAT]	1911.87	0	0	7.51926e+07	3.4749e+07	3.18576e+07	3.67158e+07	51776968	5.98035e+07	4.90652e+07	2.85485e+07	60783675	0			95.51	74.19	50.37	67.89	65.08	77.35	81.18	65.03	95.73				8.99808e-10	1.12414e-07	3.07641e-05	5.28303e-07	9.31368e-07	5.52232e-08	2.59107e-08	9.42153e-07	8.68727e-10				2	2	2	2	2	2	2
HSIGDTKVPFCLQSCVKPLK	C11(Methylthio); C15(Methylthio)	P13264	Glutaminase kidney isoform, mitochondrial OS=Rattus norvegicus GN=Gls PE=1 SV=2 - [GLSK_RAT]	2292.13	0	0	20735258	0	0	0	39135638	0	0	3.98428e+07	0	0			50.74				38.33			31.9					7.54785e-05				0.00121921			0.00558491					4				4
QGLLPSLEDLLFYTIAEGQEKIPVHK		P13264	Glutaminase kidney isoform, mitochondrial OS=Rattus norvegicus GN=Gls PE=1 SV=2 - [GLSK_RAT]	2938.59	0	0	0	57012281	1.01032e+08	0	0	0	9.20231e+07	0	6.99383e+07	2.43578e+07			31.23	32.01	50.11				34.02		47.58	43.47			0.00267441	0.00201442	3.55871e-05				0.00152567		5.58663e-05	0.00014393			3	4	4				4
TALHVAAAEGHVEVVK		P13264	Glutaminase kidney isoform, mitochondrial OS=Rattus norvegicus GN=Gls PE=1 SV=2 - [GLSK_RAT]	1630.89	0	0	0	0	12155290	0	3.0458e+07	4.44579e+07	0	1.95611e+07	0	0					46.18		46.85	79.14		36							0.00012411		0.000106367	6.2778e-08		0.00129362							3		3	3
VLSPEAVR		P13264	Glutaminase kidney isoform, mitochondrial OS=Rattus norvegicus GN=Gls PE=1 SV=2 - [GLSK_RAT]	870.505	0	7.01087e+06	0	0	0	3.28752e+07	0	0	54949850	0	0	0		49.21				42.58			49.33					1.6793e-05				7.72908e-05			1.63353e-05					2				2			2
YAIAVNDLGTEYVHR		P13264	Glutaminase kidney isoform, mitochondrial OS=Rattus norvegicus GN=Gls PE=1 SV=2 - [GLSK_RAT]	1720.87	0	0	0	1.85041e+07	0	1.78504e+07	3.80301e+07	0	3.71188e+07	0	2.32749e+07	0				84.71		58.14	47.08		94.03		59.13					2.16361e-08		9.43789e-06	0.000112634		2.29313e-09		7.02535e-06					2		2	2		2
YVGKEPSGLR		P13264	Glutaminase kidney isoform, mitochondrial OS=Rattus norvegicus GN=Gls PE=1 SV=2 - [GLSK_RAT]	1105.6	0	0	5.61857e+07	3.16491e+07	0	2.91761e+07	0	0	0	0	0	1.99274e+07		43.74	50.5	48.98		39.43				36.17	50.81	50.39		0.000173294	3.25307e-05	4.74276e-05		0.000427594				0.000905798	3.3609e-05	3.42792e-05		2	3	3		3
AMREENGLR	N6(Deamidated)	P09606	Glutamine synthetase OS=Rattus norvegicus GN=Glul PE=1 SV=3 - [GLNA_RAT]	1076.52	0	3.43801e+07	0	5.29712e+07	0	0	0	0	0	9.95153e+07	0	0		37.35		39.78		40.38				44.86	36.9			0.000984813		0.000610138		0.000531408				0.000174724	0.000826904			3		3		2
AYDPKGGLDNAR	N10(Deamidated)	P09606	Glutamine synthetase OS=Rattus norvegicus GN=Glul PE=1 SV=3 - [GLNA_RAT]	1277.61	0	0	0	0	1.92762e+07	1.74664e+07	0	0	0	0	0	7760704					40.26	43.16						44.35					0.000367337	0.000185978						0.000148749					2	2
AYDPKGGLDNAR		P09606	Glutamine synthetase OS=Rattus norvegicus GN=Glul PE=1 SV=3 - [GLNA_RAT]	1276.63	6.41464e+07	0	275892923	0	5.6117e+08	4.07806e+08	1.40459e+08	1.08425e+07	2.03253e+08	2.14178e+08	0	1.63372e+08	58.48	61.16	75.52	58.67	82.66	63.14	69.06	61.53	82.59	61.55	52.28	74.56	7.09529e-06	3.82798e-06	1.40272e-07	6.79157e-06	2.71e-08	2.42644e-06	6.20826e-07	3.51536e-06	2.75404e-08	3.49921e-06	2.95781e-05	1.74973e-07	2	3	2	3	2	2	2	2	2
AYDPKGGLDNARR		P09606	Glutamine synthetase OS=Rattus norvegicus GN=Glul PE=1 SV=3 - [GLNA_RAT]	1432.73	0	0	0	0	1.68654e+08	0	0	2.76478e+06	0	7.60566e+07	0	5.46655e+07					39.36			35.23		31.89		32.45					0.000608358			0.00157456		0.0033975		0.00298648					3			3
CIEEAIDKLSK	C1(Methylthio)	P09606	Glutamine synthetase OS=Rattus norvegicus GN=Glul PE=1 SV=3 - [GLNA_RAT]	1294.63	0	0	1692635690	0	9.80681e+08	657138418	0	2.46697e+08	9.22618e+08	7.23601e+08	2.8881e+08	8.59359e+08			52.06		54.73	52.34		51.66	45.09	42.83	50.93	46.05			2.73812e-05		1.5816e-05	2.56716e-05		3.03641e-05	0.000137835	0.000237144	3.5922e-05	0.000116707			2		2	2		2	2
CIEEAIDKLSKR	C1(Methylthio)	P09606	Glutamine synthetase OS=Rattus norvegicus GN=Glul PE=1 SV=3 - [GLNA_RAT]	1450.74	0	0	0	6.1842e+08	7.54117e+08	4.60612e+08	0	248717564	5.35973e+08	0	244973740	6.00006e+08	63.25		57.74	90.16	90.07	71.38		90.15	90.03		66.74	84.8	2.20015e-06		9.08644e-06	5.20468e-09	5.60886e-09	3.74807e-07		4.58874e-09	4.7173e-09		1.04859e-06	1.70533e-08	3		3	2	2	2		2	2
DPFRRDPNKLVFCEVFK	C13(Methylthio)	P09606	Glutamine synthetase OS=Rattus norvegicus GN=Glul PE=1 SV=3 - [GLNA_RAT]	2156.07	0	0	4.39508e+07	0	0	0	0	0	0	0	4.47265e+07	5.61712e+07			32.91								37.71	37.39			0.0040167								0.00143172	0.0013588			4
GYFEDRRPSANCDPYAVTEAIVR	C12(Methylthio)	P09606	Glutamine synthetase OS=Rattus norvegicus GN=Glul PE=1 SV=3 - [GLNA_RAT]	2675.23	0	0	0	147475617	157195203	1.37938e+08	0	0	0	0	0	0				33.52	36.55	40.82		30.55								0.00200084	0.00104015	0.000364295		0.00405282								4	4	4		3
IQLMYIWVDGTGEGLR		P09606	Glutamine synthetase OS=Rattus norvegicus GN=Glul PE=1 SV=3 - [GLNA_RAT]	1850.94	0	0	0	6218913	0	0	1.92376e+07	2.02015e+07	0	0	0	0				32.61			101.83	47.55								0.0033719			4.00249e-10	0.000108112								2			2	2
KGYFEDR		P09606	Glutamine synthetase OS=Rattus norvegicus GN=Glul PE=1 SV=3 - [GLNA_RAT]	914.437	0	0	2.26799e+07	0	3.00876e+07	0	6.17633e+07	0	7.60804e+07	5.71236e+07	3.3086e+07	0			44.21		39.75		53.42		47.78	50.41	44.72				3.98281e-05		0.000142999		5.91484e-06		2.16742e-05	1.22838e-05	4.38474e-05				2		2		2		2
KGYFEDRRPSANCDPYAVTEAIVR	C13(Methylthio)	P09606	Glutamine synthetase OS=Rattus norvegicus GN=Glul PE=1 SV=3 - [GLNA_RAT]	2803.33	0	0	0	6.48808e+08	8.54465e+08	4.7229e+08	4.5581e+08	0	0	6.41952e+08	0	805391642				32.23	30.54	32.97	32.32			32.25		32.65				0.00433848	0.00635818	0.00388589	0.00427881			0.00428877		0.00415587				4	4	4	4
LTGFHETSNINDFSAGVANR		P09606	Glutamine synthetase OS=Rattus norvegicus GN=Glul PE=1 SV=3 - [GLNA_RAT]	2150.03	0	0	2.54948e+08	0	0	0	0	1.00002e+09	1.58704e+08	101183572	5.22252e+08	0	81.83		57.01	52.89	56.04		65.98	85.3	84.4	79.26	83.46		4.33056e-08		1.35366e-05	3.4955e-05	1.6302e-05		1.69073e-06	2.02158e-08	2.43262e-08	7.94465e-08	3.02047e-08		3		2	3	3		3	2	2
LTGFHETSNINDFSAGVANR	N11(Deamidated)	P09606	Glutamine synthetase OS=Rattus norvegicus GN=Glul PE=1 SV=3 - [GLNA_RAT]	2151.01	0	0	0	4.46139e+07	4.49442e+07	0	6.29122e+07	91115738	4.60414e+07	0	0	46157940	69.13			69.47	66.44	79.83	68.45	76.54	74.89	64.19		71.78	6.84208e-07			6.21388e-07	1.22573e-06	5.61557e-08	7.71603e-07	1.24219e-07	1.70278e-07	1.86722e-06		3.78334e-07	3			3	3	2	3	3	3
MGDHLWVAR		P09606	Glutamine synthetase OS=Rattus norvegicus GN=Glul PE=1 SV=3 - [GLNA_RAT]	1084.54	0	0	2.03431e+07	0	0	0	1.09354e+07	0	0	0	1.02842e+07	0			39				40.42				40.21				0.00042174				0.000267807				0.000281075				3				3
QMYMNLPQGEK		P09606	Glutamine synthetase OS=Rattus norvegicus GN=Glul PE=1 SV=3 - [GLNA_RAT]	1338.61	0	0	1.48804e+08	173557102	0	0	0	0	0	1.018e+08	8.30201e+07	87690029			30.27	34.71		34.54				40.69	38.09	31.42			0.003383	0.00120013		0.00126562				0.00034124	0.000636479	0.00270415			2	2		2
RDPNKLVFCEVFK	C9(Methylthio)	P09606	Glutamine synthetase OS=Rattus norvegicus GN=Glul PE=1 SV=3 - [GLNA_RAT]	1640.83	0	0	0	6.26716e+07	0	0	8.78866e+07	0	0	1.996e+07	0	6.41091e+07				34.97			34.08			36.33		33.73				0.00171947			0.00211054			0.00130373		0.00222413				3			3
RLTGFHETSNINDFSAGVANR		P09606	Glutamine synthetase OS=Rattus norvegicus GN=Glul PE=1 SV=3 - [GLNA_RAT]	2306.12	6.88032e+07	0	0	2.39802e+08	0	0	409923748	0	308485294	0	0	4.69448e+08	61.36			50.38		78.39	61.79	64.99	50.18			58.08	5.776e-06			7.60463e-05		1.04312e-07	5.23151e-06	2.47226e-06	7.57926e-05			1.22143e-05	4			4		3	4	3	4
RLTGFHETSNINDFSAGVANR	N12(Deamidated)	P09606	Glutamine synthetase OS=Rattus norvegicus GN=Glul PE=1 SV=3 - [GLNA_RAT]	2307.11	0	0	8.42435e+07	9.37767e+07	0	5.2331e+07	1.14791e+08	1.40506e+08	119946751	7.50464e+07	0	1.46249e+08			69.55	54.14	85.87	50.07	68.45	74.29	43.91	69.71	68.67	68.46			9.09523e-07	2.91036e-05	2.03175e-08	6.15007e-05	9.78792e-07	2.81156e-07	0.00026622	8.17827e-07	9.30445e-07	9.76541e-07			3	3	2	3	3	3	3
RPSANCDPYAVTEAIVR	C6(Methylthio)	P09606	Glutamine synthetase OS=Rattus norvegicus GN=Glul PE=1 SV=3 - [GLNA_RAT]	1907.9	0	0	3.69129e+08	2.52277e+08	201052996	154920843	3.16481e+08	0	2.82575e+08	0	1.98111e+08	0			70.11	74.66	74.71	57.47	74.76		65.06	50.81	74.86	61.01			5.06995e-07	2.44515e-07	2.41716e-07	1.21761e-05	2.03859e-07		2.18322e-06	5.93343e-05	1.63294e-07	5.46826e-06			3	3	3	3	3		3
TLDCDPK	C4(Methylthio)	P09606	Glutamine synthetase OS=Rattus norvegicus GN=Glul PE=1 SV=3 - [GLNA_RAT]	837.348	0	9.51144e+07	0	0	0	3.30094e+08	194045474	0	0	0	0	8.8077e+07		34.94				30.93	40.05					42.78		0.000319867				0.000805323	9.86211e-05					5.25981e-05		2				2	2
YNRKPAETNLR		P09606	Glutamine synthetase OS=Rattus norvegicus GN=Glul PE=1 SV=3 - [GLNA_RAT]	1361.73	6.25599e+06	1.27862e+06	1.18768e+08	0	50551429	0	6.91356e+07	0	0	0	2.67381e+07	0	42.47	31.73	40.54		42.2		51.87				32.37		0.000288782	0.00342429	0.000450371		0.000319357		3.31566e-05				0.00295509		3	3	3		3		3
FLQPGSQR		P04904	Glutathione S-transferase alpha-3 OS=Rattus norvegicus GN=Gsta3 PE=1 SV=3 - [GSTA3_RAT]	932.495	0	0	5.60487e+07	5.42932e+07	5.71887e+07	0	76756226	0	6.81961e+07	0	0	0			46.59	45.39	42.76		46.84		44.51						8.66158e-05	0.000112737	0.000209217		8.07355e-05		0.000139829						2	2	2		2		2
KFLQPGSQR		P04904	Glutathione S-transferase alpha-3 OS=Rattus norvegicus GN=Gsta3 PE=1 SV=3 - [GSTA3_RAT]	1060.59	0	0	0	5.45224e+07	54411603	0	5.54979e+07	0	79598745	0	3.16504e+07	0				36.89	35.89		39.55		41.6		41.24					0.00117671	0.00148138		0.000560133		0.000349375		0.00037957					2	2		2		2
KPLEDEKCVESAVK	C8(Methylthio)	P04904	Glutathione S-transferase alpha-3 OS=Rattus norvegicus GN=Gsta3 PE=1 SV=3 - [GSTA3_RAT]	1620.79	0	0	94665379	0	0	3.92939e+07	0	5.14453e+06	0	0	1.79106e+07	6.69859e+07			81.19	32.92		60.96	42.88	50.48	34.32	54.45	77.84	70.85			4.52394e-08	0.00285883		4.7299e-06	0.000288528	5.01404e-05	0.00229293	2.00996e-05	9.37292e-08	4.64567e-07			2	3		2	3	2	2
VSNLPTVKK		P04904	Glutathione S-transferase alpha-3 OS=Rattus norvegicus GN=Gsta3 PE=1 SV=3 - [GSTA3_RAT]	985.603	0	0	31898985	0	0	1.15611e+07	2.33171e+07	0	0	0	0	0			39.39			32.16	42.08								0.0002877			0.00152034	0.00015486								2			2	2
FKLGLDFPNLPYLIDGSRK		P04905	Glutathione S-transferase Mu 1 OS=Rattus norvegicus GN=Gstm1 PE=1 SV=2 - [GSTM1_RAT]	2193.21	0	0	2.3476e+07	1.42315e+07	0	0	1.54286e+07	0	1.50585e+07	0	0	1.09591e+07			46.44	49.82			39.59		33.29			60.32			6.80959e-05	2.81426e-05			0.000335197		0.00140644			2.83335e-06			3	3			3		3
LGLDFPNLPYLIDGSRK		P04905	Glutathione S-transferase Mu 1 OS=Rattus norvegicus GN=Gstm1 PE=1 SV=2 - [GSTM1_RAT]	1918.04	0	0	0	8.22446e+06	0	0	12348018	0	1.10201e+07	0	5.51883e+06	0				66.27			67.16		66.3		61.34					1.07402e-06			1.11539e-06		1.13695e-06		3.37876e-06					3			3		3
DGRGAAQNIIPASTGAAK		P04797	Glyceraldehyde-3-phosphate dehydrogenase OS=Rattus norvegicus GN=Gapdh PE=1 SV=3 - [G3P_RAT]	1697.89	1.07897e+08	1.68576e+08	1.38075e+09	8.85173e+08	1295153006	9.1412e+08	7.27419e+08	5.62267e+07	896885402	5.13907e+08	545351713	6.06658e+08	46.35	54.26	51.95	49.34	64.3	47.59	44.99	52.6	39.39	49.52	48.89	52.43	0.000111235	1.70613e-05	2.96793e-05	5.35498e-05	1.80195e-06	7.92522e-05	0.000144215	2.52789e-05	0.000523614	4.69083e-05	5.42312e-05	2.7431e-05	2	2	2	2	2	2	2	2	2
GAAQNIIPASTGAAK		P04797	Glyceraldehyde-3-phosphate dehydrogenase OS=Rattus norvegicus GN=Gapdh PE=1 SV=3 - [G3P_RAT]	1369.74	0	4.67459e+08	3015160183	2449161880	2.39779e+09	2.53392e+09	3051557374	0	3.85169e+09	1.52031e+09	1.96755e+09	1601037023		45.46	40.96	42.97	53.2	39.33	42.72		36.58	58.29	58.02	42.94		8.53338e-05	0.000292612	0.000209434	1.41196e-05	0.000361711	0.000157696		0.000637379	4.37343e-06	4.57507e-06	0.000147366		2	2	2	2	2	2		2
LEKPAKYDDIK		P04797	Glyceraldehyde-3-phosphate dehydrogenase OS=Rattus norvegicus GN=Gapdh PE=1 SV=3 - [G3P_RAT]	1319.72	0	0	0	53791696	2.36825e+07	27157612	9.12467e+07	0	1.32675e+08	0	4.34421e+07	0			47.84	53.19	44.74	43.44	61.31		48.92	48.89	65.55	56.55			6.65971e-05	1.99089e-05	0.000135974	0.000183424	2.9954e-06		5.19344e-05	5.22944e-05	1.12838e-06	8.96303e-06			3	2	2	2	2		2
LEKPAKYDDIKK		P04797	Glyceraldehyde-3-phosphate dehydrogenase OS=Rattus norvegicus GN=Gapdh PE=1 SV=3 - [G3P_RAT]	1447.81	1.76772e+07	0	397665679	0	8.13223e+07	0	2.74717e+08	0	4.58232e+08	0	165569977	1.24775e+08	42.46		54.34		43.9		53.02		47.58		52.58	48.05	0.000158912		1.1412e-05		0.000126288		1.39688e-05		4.45185e-05		1.62863e-05	4.62192e-05	3		3		3		3		3
LEKPAKYDDIKKVVK		P04797	Glyceraldehyde-3-phosphate dehydrogenase OS=Rattus norvegicus GN=Gapdh PE=1 SV=3 - [G3P_RAT]	1774.05	0	0	3.90898e+08	1.76092e+08	274912043	1.45008e+08	64922995	9.58432e+06	1.40294e+08	1.47641e+08	1.38303e+08	205834684			36.95	50.03	66.59	56.03	60.87	48.6	53.45	52.94	59.74	58.11			0.00022202	1.09243e-05	2.18761e-07	2.74405e-06	8.16526e-07	1.51842e-05	4.50786e-06	5.58975e-06	1.05918e-06	1.69978e-06			3	3	3	3	3	3	3
LISWYDNEYGYSNR		P04797	Glyceraldehyde-3-phosphate dehydrogenase OS=Rattus norvegicus GN=Gapdh PE=1 SV=3 - [G3P_RAT]	1779.8	9.99575e+07	0	2.88966e+08	245606886	295443084	1.89292e+08	3.21099e+08	0	3.08477e+08	2.23157e+08	2.99726e+08	419956552	57.22		59.04	85.89	85	67.88	78.6		82.12	78.48	83.39	71.85	6.4488e-06		3.11846e-06	8.50186e-09	9.80306e-09	5.37668e-07	4.55527e-08		2.02541e-08	4.68289e-08	1.39733e-08	2.15533e-07	2		2	2	2	2	2		2
LTGMAFR	M4(Oxidation)	P04797	Glyceraldehyde-3-phosphate dehydrogenase OS=Rattus norvegicus GN=Gapdh PE=1 SV=3 - [G3P_RAT]	811.413	0	0	0	8.89036e+06	0	0	3.49888e+07	0	0	8.09898e+06	2.28888e+07	0				42.48			51.87			41.66	44.26					7.62665e-05			7.15143e-06			7.50573e-05	4.1247e-05					2			2
LTGMAFRVPTPNVSVVDLTCR	C20(Methylthio)	P04797	Glyceraldehyde-3-phosphate dehydrogenase OS=Rattus norvegicus GN=Gapdh PE=1 SV=3 - [G3P_RAT]	2322.17	0	0	0	0	0	0	112436444	31554290	7.18336e+07	6.71168e+07	0	1.04705e+08			40.33				69.71	68.78	43.7	37.62		78.67			0.000722927				7.8041e-07	9.66769e-07	0.000302871	0.00128871		1.07986e-07			2				3	3	3
RVIISAPSADAPMFVMGVNHEK		P04797	Glyceraldehyde-3-phosphate dehydrogenase OS=Rattus norvegicus GN=Gapdh PE=1 SV=3 - [G3P_RAT]	2369.21	0	0	119673931	43441246	0	0	68824595	0	7.25214e+07	3.42775e+07	0	0			43.82	51.24	38.85		45.42		47.34	65.08					0.00035686	6.46396e-05	0.00106208		0.000251193		0.000160516	2.71649e-06					3	3	3		3		3
RVIISAPSADAPMFVMGVNHEKYDNSLK		P04797	Glyceraldehyde-3-phosphate dehydrogenase OS=Rattus norvegicus GN=Gapdh PE=1 SV=3 - [G3P_RAT]	3089.55	0	0	0	2.2416e+08	4.2015e+07	0	265231362	0	0	0	0	6.21114e+07			31.08	55.4	32.62	37.12	61.61	32.83	35.56		39.22	58.27			0.00662856	2.85519e-05	0.00519665	0.00192148	6.83337e-06	0.00508165	0.00276581		0.00116682	1.30319e-05			4	3	3	3	3	4	4
TVDGPSGKLWR		P04797	Glyceraldehyde-3-phosphate dehydrogenase OS=Rattus norvegicus GN=Gapdh PE=1 SV=3 - [G3P_RAT]	1215.65	0	0	0	179085338	3.28903e+08	1.75898e+08	0	7.933e+06	0	145391709	204901286	1.09862e+08			62.13	63.41	67.38	67.55		63.75		68.7	64.01	63.31			2.93928e-06	2.18898e-06	8.77488e-07	7.73486e-07		1.98197e-06		6.47502e-07	1.90652e-06	2.0533e-06			3	2	2	2		2
VGVNGFGR	N4(Deamidated)	P04797	Glyceraldehyde-3-phosphate dehydrogenase OS=Rattus norvegicus GN=Gapdh PE=1 SV=3 - [G3P_RAT]	806.416	0	1.19965e+07	0	3.37436e+07	2.73565e+07	44276038	8.40668e+07	0	4.56326e+07	3.06265e+07	20929134	18753983		56.52		54.92	53.66	51.48	54.81		60.05	45.6	51.19	54.03		5.90535e-06		8.53583e-06	1.1409e-05	1.88472e-05	8.75479e-06		2.61967e-06	7.29871e-05	2.01486e-05	1.04772e-05		2		2	2	2	2		2
VIHDNFGIVEGLMTTVHAITATQK		P04797	Glyceraldehyde-3-phosphate dehydrogenase OS=Rattus norvegicus GN=Gapdh PE=1 SV=3 - [G3P_RAT]	2595.36	0	0	0	4.15995e+08	0	3.16634e+08	5.35027e+08	0	0	0	408048203	0				74.29	31.13	99.69	88.71				86.94	30.3				2.36469e-07	0.0052036	7.03463e-10	8.41163e-09				1.36554e-08	0.00592616				3	2	3	3
VIHDNFGIVEGLMTTVHAITATQK	M13(Oxidation)	P04797	Glyceraldehyde-3-phosphate dehydrogenase OS=Rattus norvegicus GN=Gapdh PE=1 SV=3 - [G3P_RAT]	2611.35	0	0	8.13368e+07	5.1181e+07	6.18048e+07	0	81232511	1.83126e+08	6.00336e+07	9.67854e+07	5.45171e+07	5.66701e+07			112.89	115.88	104.56	108.67	97.51	103.38	99.43	94.44	100.98	114.21			3.72682e-11	2.00125e-11	2.69458e-10	1.03911e-10	1.39274e-09	3.44399e-10	9.23602e-10	2.77007e-09	5.78546e-10	2.90176e-11			3	3	3	3	3	3	3
VIISAPSADAPMFVMGVNHEK		P04797	Glyceraldehyde-3-phosphate dehydrogenase OS=Rattus norvegicus GN=Gapdh PE=1 SV=3 - [G3P_RAT]	2213.11	0	0	116810545	9.31045e+07	5.19695e+07	4.57606e+07	0	0	0	0	0	0			36.53	33.44	38.4	30.93									0.00152297	0.0033288	0.000997353	0.00565065									3	3	3	3
VIPELNGKLTGMAFR	N6(Deamidated); M12(Oxidation)	P04797	Glyceraldehyde-3-phosphate dehydrogenase OS=Rattus norvegicus GN=Gapdh PE=1 SV=3 - [G3P_RAT]	1662.89	0	0	0	8.92436e+07	0	67219386	0	0	130895977	0	0	0				59.67	33.84	61.35			72.88	30.95						5.77236e-06	0.00254024	4.21374e-06			2.91104e-07	0.00530327						2	3	2			2
VIPELNGKLTGMAFR	N6(Deamidated)	P04797	Glyceraldehyde-3-phosphate dehydrogenase OS=Rattus norvegicus GN=Gapdh PE=1 SV=3 - [G3P_RAT]	1646.89	1.32013e+08	0	7.72739e+08	661827400	4.1235e+08	4.12876e+08	8.21273e+08	0	936838560	2.54171e+08	900022590	624873475	78.75		88.01	93.59	80.32	92.34	93.61	58.85	92.8	87.5	92.25	88.31	7.33437e-08		9.80374e-09	2.73451e-09	5.4809e-08	3.38398e-09	2.52597e-09	7.55837e-06	2.91268e-09	9.86945e-09	3.33571e-09	8.26396e-09	2		2	2	2	2	2	3	2
VKVGVNGFGR		P04797	Glyceraldehyde-3-phosphate dehydrogenase OS=Rattus norvegicus GN=Gapdh PE=1 SV=3 - [G3P_RAT]	1032.59	0	0	0	2.8044e+07	0	2.53504e+07	0	0	2.27084e+07	0	0	0				45		44.16			41.62							0.00011068		0.000134298			0.000172163							2		2			2
VKVGVNGFGR	N6(Deamidated)	P04797	Glyceraldehyde-3-phosphate dehydrogenase OS=Rattus norvegicus GN=Gapdh PE=1 SV=3 - [G3P_RAT]	1033.58	0	5.09825e+07	1.03907e+09	6.8423e+08	7.08965e+08	6.73701e+08	5.60363e+08	2.06979e+07	8.03588e+08	4.22718e+08	536700587	441887269		58.47	55.97	46.72	47.06	54.6	45.09	41.94	50.06	36.37	55.58	52.77		4.90703e-06	6.44971e-06	7.34208e-05	6.78921e-05	9.36189e-06	7.89842e-05	0.000163132	2.51501e-05	0.000588221	7.88578e-06	1.82314e-05		2	2	2	2	2	2	2	2
VPTPNVSVVDLTCR	C13(Methylthio)	P04797	Glyceraldehyde-3-phosphate dehydrogenase OS=Rattus norvegicus GN=Gapdh PE=1 SV=3 - [G3P_RAT]	1545.78	0	0	6.09256e+08	484557269	215119104	0	998432325	8.86977e+07	8.15326e+08	3.17424e+08	5.42695e+08	501178404		82.25	80.36	80.04	99.56		99.7	93.78	94.19	99.63	99.52	99.52		3.93137e-08	5.66076e-08	6.39087e-08	6.63974e-10		7.50064e-10	2.44994e-09	2.66746e-09	7.18694e-10	6.75702e-10	6.64534e-10		2	2	2	2		2	2	2
VPTPNVSVVDLTCRLEKPAK	C13(Methylthio)	P04797	Glyceraldehyde-3-phosphate dehydrogenase OS=Rattus norvegicus GN=Gapdh PE=1 SV=3 - [G3P_RAT]	2212.18	0	0	2.96733e+07	0	0	0	0	21324361	0	0	0	3.05725e+07			41.17				41.73	38.8				34.43			0.00046594				0.000339072	0.000685494				0.0021815			3				4	3
VPTPNVSVVDLTCRLEKPAKYDDIK	C13(Methylthio)	P04797	Glyceraldehyde-3-phosphate dehydrogenase OS=Rattus norvegicus GN=Gapdh PE=1 SV=3 - [G3P_RAT]	2846.48	0	0	0	2.82196e+07	0	0	0	0	4.54473e+07	0	43330466	5.13625e+07				33.53					31.53		33.21	32.47				0.00319398					0.00527304		0.00355759	0.00424679				3					3
VVKQAAEGPLK		P04797	Glyceraldehyde-3-phosphate dehydrogenase OS=Rattus norvegicus GN=Gapdh PE=1 SV=3 - [G3P_RAT]	1139.68	0	3.7115e+06	1.7803e+07	7621465	0	19686547	0	0	14577216	9.57434e+06	1.73256e+07	0		57.43	44.72	36.43		57.37			49.39	41.51	47.09			1.80717e-06	3.37287e-05	0.00022751		1.83231e-06			1.1508e-05	7.06318e-05	1.95434e-05			2	2	2		2			2
AITNLDVEQYR		P35571	Glycerol-3-phosphate dehydrogenase, mitochondrial OS=Rattus norvegicus GN=Gpd2 PE=1 SV=1 - [GPDM_RAT]	1321.68	0	0	3.63564e+07	0	0	0	0	0	0	1.65518e+07	0	2.58039e+07			74.73							66.54		45.67			1.46383e-07							1.04255e-06		0.00014635			2
CKDVLTGHEFNVR	C1(Methylthio)	P35571	Glycerol-3-phosphate dehydrogenase, mitochondrial OS=Rattus norvegicus GN=Gpd2 PE=1 SV=1 - [GPDM_RAT]	1563.74	0	0	214727733	1.22265e+08	1.51795e+08	13085034	0	0	0	0	0	0			83.11	70.71	89.18	75.69		51.62		51.52	39.24	37.88			1.97904e-08	3.3118e-07	4.71047e-09	1.20049e-07		3.30553e-05		3.38253e-05	0.000536059	0.00060284			2	2	2	2		3
CVINATGPFTDSVR	C1(Methylthio)	P35571	Glycerol-3-phosphate dehydrogenase, mitochondrial OS=Rattus norvegicus GN=Gpd2 PE=1 SV=1 - [GPDM_RAT]	1525.71	29880169	0	1.16125e+08	1.03323e+08	0	6.76329e+07	7.92827e+07	0	7.74529e+07	7.69795e+07	4.78312e+07	69981235	66.23	65.18	93.2	89.2		83.95	84.74		87.62	88.44	95.05	107.8	9.29105e-07	1.10737e-06	1.55555e-09	3.66691e-09		1.3491e-08	1.19187e-08		5.88138e-09	4.51139e-09	1.15665e-09	5.89153e-11	2	2	2	2		2	2		2
LHNLNAGPSR		P35571	Glycerol-3-phosphate dehydrogenase, mitochondrial OS=Rattus norvegicus GN=Gpd2 PE=1 SV=1 - [GPDM_RAT]	1078.57	0	1.48598e+07	1.24268e+08	6.12899e+07	7.10732e+07	8.07753e+07	90720905	1.33288e+06	0	0	5.42765e+07	4.85017e+07		33.93	43.08	31.49	39.87	41.81	33.56	33.78			31.26	35.32		0.00184082	0.000209117	0.00322858	0.000443066	0.000299924	0.00200452	0.00190551			0.00340417	0.00133663		2	2	2	2	2	2	2
LVQDYGLESEVAQHLAK		P35571	Glycerol-3-phosphate dehydrogenase, mitochondrial OS=Rattus norvegicus GN=Gpd2 PE=1 SV=1 - [GPDM_RAT]	1899.98	0	0	0	0	0	0	150077980	2.378e+07	1.45071e+08	91914027	0	0			82.6			35.64	35.49	41.03	43.15	39.82					4.23146e-08			0.00204673	0.00197742	0.000567979	0.0003365	0.000719199					3			3	2	2	2
RVPIPVDR		P35571	Glycerol-3-phosphate dehydrogenase, mitochondrial OS=Rattus norvegicus GN=Gpd2 PE=1 SV=1 - [GPDM_RAT]	951.573	0	0	2.19526e+08	134714547	1.3708e+08	143887152	1.80334e+08	3.29753e+06	247034926	7.72237e+07	9.61487e+07	8.30584e+07			48.34	32.88	30.18	33.33	40.64	30.56	34.64	30.67	33.72	30.85			1.46208e-05	0.000514008	0.000957128	0.000463415	8.60934e-05	0.00087694	0.000342744	0.000855008	0.000423614	0.000820295			2	2	2	2	2	2	2
SMAEDTVNKAVK		P35571	Glycerol-3-phosphate dehydrogenase, mitochondrial OS=Rattus norvegicus GN=Gpd2 PE=1 SV=1 - [GPDM_RAT]	1292.65	0	9.29e+06	7.30158e+07	0	0	0	0	0	8.62007e+07	4.30658e+07	0	3.61267e+07		39.2	46.31						34.09	38.78		46.71		0.000763438	0.000149686						0.00255412	0.000840957		0.000139714		2	2						2
TVGLFLQGGKDWSPTLYIR		P35571	Glycerol-3-phosphate dehydrogenase, mitochondrial OS=Rattus norvegicus GN=Gpd2 PE=1 SV=1 - [GPDM_RAT]	2151.16	0	0	1.26447e+08	6.52557e+07	0	2.88304e+07	5.13476e+07	0	4.68301e+07	7.21427e+07	8.68149e+07	0			55.92	88.56	66.03	48.19	76.51	70.26	61.51	76.63	72.94				1.21533e-05	7.5927e-09	1.22235e-06	9.40571e-05	1.13912e-07	4.47398e-07	3.95538e-06	1.06462e-07	2.79488e-07				2	2	3	2	2	3	2
TYGDKAFDVAK		P35571	Glycerol-3-phosphate dehydrogenase, mitochondrial OS=Rattus norvegicus GN=Gpd2 PE=1 SV=1 - [GPDM_RAT]	1214.61	0	0	1.34412e+08	9.60739e+07	9.58047e+07	1.0416e+08	1.00912e+08	6.05091e+06	75647951	0	3.58857e+07	5.83781e+07			51.89	51.91	43.63	46.33	41.83	44.82	46.08		54.95	35.53			2.32971e-05	1.77147e-05	0.000156064	8.73034e-05	0.000236212	0.000125252	8.87774e-05		1.21558e-05	0.00104962			2	2	2	2	2	2	2
VIFFLPWEK		P35571	Glycerol-3-phosphate dehydrogenase, mitochondrial OS=Rattus norvegicus GN=Gpd2 PE=1 SV=1 - [GPDM_RAT]	1178.66	0	0	6.56908e+07	4.57946e+07	0	0	0	0	0	3.226e+07	8.20719e+07	8.84397e+07			39.14	39.42						30.83	34.49	32.05			0.000414456	0.000382864						0.00256072	0.00119136	0.0021207			2	2
ARPEYMLPVHFYGR		P53534	Glycogen phosphorylase, brain form (Fragment) OS=Rattus norvegicus GN=Pygb PE=1 SV=3 - [PYGB_RAT]	1735.87	0	0	7.94682e+07	9.03188e+07	0	0	0	0	0	6.35749e+07	1.01364e+08	81901892			34.32	37						39.84	42.49	30.43			0.00308807	0.00167602						0.000840398	0.000411455	0.00747229			3	3
GIAGLGDVAEVR		P53534	Glycogen phosphorylase, brain form (Fragment) OS=Rattus norvegicus GN=Pygb PE=1 SV=3 - [PYGB_RAT]	1156.63	0	0	0	0	0	0	0	0	0	0	24123283	1.86926e+07										80.66	49.61	49.45										2.27639e-08	3.11778e-05	3.97254e-05
LLSLVDDEAFIRDVAK		P53534	Glycogen phosphorylase, brain form (Fragment) OS=Rattus norvegicus GN=Pygb PE=1 SV=3 - [PYGB_RAT]	1803.99	0	0	0	1.18684e+07	0	0	1.53896e+07	0	1.85514e+07	0	0	0				71.53			60.82		60.56							3.16383e-07			3.76714e-06		3.99955e-06							3			3		3
TCFETFPDKVAIQLNDTHPALSIPELMR	C2(Methylthio)	P53534	Glycogen phosphorylase, brain form (Fragment) OS=Rattus norvegicus GN=Pygb PE=1 SV=3 - [PYGB_RAT]	3232.57	0	0	66494991	0	0	0	0	0	24424885	0	26600680	0			51.48						47.06		35.46				6.79209e-05						0.000184981		0.00275913				3						3
IAQSDYIPTQQDVLR		P04897	Guanine nucleotide-binding protein G(i) subunit alpha-2 OS=Rattus norvegicus GN=Gnai2 PE=1 SV=3 - [GNAI2_RAT]	1746.91	0	0	6.1848e+07	4.85329e+07	47443731	0	3.11014e+07	0	4.92364e+07	3.58158e+07	34549957	0		58.33	36.86	50.9	55.96		70.3		54.35	61.18	70.75			9.76836e-06	0.00148365	5.73046e-05	1.81262e-05		6.76609e-07		2.47916e-05	5.37266e-06	5.427e-07			2	2	2	2		2		2
LWADHGVQACFGR	C10(Methylthio)	P04897	Guanine nucleotide-binding protein G(i) subunit alpha-2 OS=Rattus norvegicus GN=Gnai2 PE=1 SV=3 - [GNAI2_RAT]	1505.67	0	0	0	0	0	0	0	6.3942e+06	0	1.0321e+07	0	1.32518e+07								60.85		34.36		55.27								2.09672e-06		0.000897772		8.17208e-06								3
RLWADHGVQACFGR	C11(Methylthio)	P04897	Guanine nucleotide-binding protein G(i) subunit alpha-2 OS=Rattus norvegicus GN=Gnai2 PE=1 SV=3 - [GNAI2_RAT]	1661.77	0	0	70217722	0	0	20708093	0	4.00849e+07	26544354	33642831	22713106	0			38.04		35.93	37.23		33.4	31.4	43.18	32.51				0.000541775		0.000880682	0.000709629		0.00166837	0.00264419	0.00016589	0.00190756				3		3	3		3	3
ACADATLSQITNNIDPVGR	C2(Methylthio)	P54311	Guanine nucleotide-binding protein G(I)/G(S)/G(T) subunit beta-1 OS=Rattus norvegicus GN=Gnb1 PE=1 SV=4 - [GBB1_RAT]	2004.95	0	0	0	6.80458e+07	6.63697e+07	76081096	8.59996e+07	4.338e+07	79302609	5.84273e+07	4.7095e+07	4.91417e+07				32.28	43.75	53.58	65.59	43.47	37.83	44.04	52.69	93.39				0.00325359	0.000227716	2.43385e-05	1.53212e-06	0.000242881	0.000890008	0.000214979	2.90666e-05	2.49687e-09				2	2	2	2	2	2
ELAGHTGYLSCCR	C11(Methylthio); C12(Methylthio)	P54311	Guanine nucleotide-binding protein G(I)/G(S)/G(T) subunit beta-1 OS=Rattus norvegicus GN=Gnb1 PE=1 SV=4 - [GBB1_RAT]	1501.6	0	0	317986503	1.39946e+08	1.1413e+08	1.58465e+08	1.38132e+08	1.85696e+08	1.14336e+08	2.12937e+08	0	1.43834e+08			71.91	75.08	59.96	72.93	46.68	78.44	51.3	60.42	80.03	77.12			6.42643e-08	3.09721e-08	1.00686e-06	5.08124e-08	2.14274e-05	1.4288e-08	7.39554e-06	9.0567e-07	9.90764e-09	1.93629e-08			2	2	2	2	2	2	2
KACADATLSQITNNIDPVGR	C3(Methylthio); N13(Deamidated)	P54311	Guanine nucleotide-binding protein G(I)/G(S)/G(T) subunit beta-1 OS=Rattus norvegicus GN=Gnb1 PE=1 SV=4 - [GBB1_RAT]	2134.02	0	0	0	0	37284870	1.66881e+07	0	1.96305e+07	0	0	1.48509e+07	0					53.84	35.74		50.79		37.32	59.84						2.85003e-05	0.00176013		5.79408e-05		0.00126967	7.41833e-06						2	2		2
KACADATLSQITNNIDPVGR	C3(Methylthio)	P54311	Guanine nucleotide-binding protein G(I)/G(S)/G(T) subunit beta-1 OS=Rattus norvegicus GN=Gnb1 PE=1 SV=4 - [GBB1_RAT]	2133.04	0	0	1.50367e+08	76419667	0	153125372	2.04517e+08	0	1.67285e+08	1.5632e+08	1.63324e+08	0	51.39		68.44	86.21	79.53	108.92	99.45		105.59	99.87	107.52	46.58	5.26427e-05		9.02278e-07	1.73515e-08	8.02292e-08	9.2969e-11	8.34233e-10		1.98762e-10	7.4703e-10	1.16827e-10	0.000159345	3		2	2	3	2	2		2
LFVSGACDASAK	C7(Methylthio)	P54311	Guanine nucleotide-binding protein G(I)/G(S)/G(T) subunit beta-1 OS=Rattus norvegicus GN=Gnb1 PE=1 SV=4 - [GBB1_RAT]	1214.55	67493402	0	0	1.23797e+08	0	0	5.53158e+07	137418748	83498643	1.6145e+08	79838727	0	58.62		49.51	60.9			38.09	58.85	54.67	63.69	38.54		3.229e-06		2.63068e-05	1.86951e-06			0.000349287	3.06244e-06	7.67684e-06	1.00477e-06	0.000321905		2		2	2			2	2	2
QTFTGHESDINAICFFPNGNAFATGSDDATCR	C14(Methylthio); N18(Deamidated); C31(Methylthio)	P54311	Guanine nucleotide-binding protein G(I)/G(S)/G(T) subunit beta-1 OS=Rattus norvegicus GN=Gnb1 PE=1 SV=4 - [GBB1_RAT]	3500.42	0	0	0	0	0	2.74375e+07	0	7.58164e+07	0	0	3.88581e+07	0						48.58		52.94			58.5							1.38676e-05		5.58975e-06			1.55379e-06							3		3
QTFTGHESDINAICFFPNGNAFATGSDDATCR	C14(Methylthio); N18(Deamidated); N20(Deamidated); C31(Methylthio)	P54311	Guanine nucleotide-binding protein G(I)/G(S)/G(T) subunit beta-1 OS=Rattus norvegicus GN=Gnb1 PE=1 SV=4 - [GBB1_RAT]	3501.43	0	0	0	0	0	0	3.5248e+07	0	3.43189e+07	1.70695e+07	0	0							32.54		35.61	41.47									0.000555866		0.000274138	7.11164e-05									3		3
ACGDSTLTQITAGLDPVGR	C2(Methylthio)	P54313	Guanine nucleotide-binding protein G(I)/G(S)/G(T) subunit beta-2 OS=Rattus norvegicus GN=Gnb2 PE=1 SV=4 - [GBB2_RAT]	1920.92	0	0	70674422	4.26633e+07	0	48753499	0	0	0	0	4.86653e+07	0			94.5	67.11		74.85					93.43				2.0047e-09	1.15749e-06		1.86584e-07					2.58747e-09				2	2		2
ELPGHTGYLSCCR	C11(Methylthio); C12(Methylthio)	P54313	Guanine nucleotide-binding protein G(I)/G(S)/G(T) subunit beta-2 OS=Rattus norvegicus GN=Gnb2 PE=1 SV=4 - [GBB2_RAT]	1527.62	0	0	1.54263e+08	177114864	92131082	1.20721e+08	143940830	0	1.44037e+08	1.39585e+08	1.18609e+08	99109257			58.33	81.92	70.44	68.71	69.57	53.56	63.64	76.46	81.3	53.83			1.46545e-06	6.41165e-09	9.01509e-08	1.34267e-07	1.10146e-07	4.39511e-06	4.31489e-07	2.25408e-08	7.39554e-09	4.13019e-06			2	2	2	2	2	3	2
KACGDSTLTQITAGLDPVGR	C3(Methylthio)	P54313	Guanine nucleotide-binding protein G(I)/G(S)/G(T) subunit beta-2 OS=Rattus norvegicus GN=Gnb2 PE=1 SV=4 - [GBB2_RAT]	2049	0	0	1.31997e+08	0	1.24977e+08	0	1.23139e+08	0	78917536	118584736	0	123170959			109.25	50.15	101.48		84.06	45.8	65.3	77.78	62.04	96.56			7.72526e-11	6.66575e-05	4.90737e-10		2.68962e-08	0.000173598	2.05109e-06	1.15874e-07	4.21992e-06	1.58976e-09			2	3	2		2	3	2
AMDTLGVEYGDKER		P59215	Guanine nucleotide-binding protein G(o) subunit alpha OS=Rattus norvegicus GN=Gnao1 PE=1 SV=2 - [GNAO_RAT]	1583.74	0	1.91862e+07	0	0	0	0	101319428	1.10635e+08	0	0	0	2.92359e+08		102.9	57.87				110.26	110.16				102.93		2.12837e-10	7.02212e-06				3.72046e-11	3.99989e-11				2.06279e-10		2	3				2	2
AMDTLGVEYGDKER	M2(Oxidation)	P59215	Guanine nucleotide-binding protein G(o) subunit alpha OS=Rattus norvegicus GN=Gnao1 PE=1 SV=2 - [GNAO_RAT]	1599.73	0	0	0	0	0	2.27864e+07	0	3.77041e+06	0	1.10615e+07	1.17107e+07	0						53.4		91.14		59.41	88.34							1.5541e-05		2.61504e-09		4.0093e-06	5.12942e-09							2		2
IGAADYQPTEQDILR		P59215	Guanine nucleotide-binding protein G(o) subunit alpha OS=Rattus norvegicus GN=Gnao1 PE=1 SV=2 - [GNAO_RAT]	1689.84	0	6.04655e+06	2.36171e+08	2.77004e+08	0	252164746	3.76404e+08	0	453056294	1.77421e+08	2.46967e+08	174110944		64.14	65.71	69.65		76.48	82.38		68.67	75.88	70.03	70.17		2.04304e-06	1.54407e-06	6.23258e-07		1.36068e-07	3.32405e-08		7.8103e-07	1.39442e-07	5.80973e-07	5.09655e-07		2	2	2		2	2		2
IIHEDGFSGEDVKQYKPVVYSNTIQSLAAIVR		P59215	Guanine nucleotide-binding protein G(o) subunit alpha OS=Rattus norvegicus GN=Gnao1 PE=1 SV=2 - [GNAO_RAT]	3576.87	0	0	2.77183e+08	1.89634e+08	2.52464e+08	1.99298e+08	0	0	181494387	2.26384e+08	254919709	2.61195e+08			38.31	37.81	47.85	43.02	37.19	37.58	44.86	38.99	33.22	43.41			0.000914938	0.000993462	9.84354e-05	0.000309308	0.00105042	0.00109114	0.000197586	0.000782333	0.00302534	0.000282743			4	4	4	4	3	4	4
LWGDSGIQECFNR	C10(Methylthio)	P59215	Guanine nucleotide-binding protein G(o) subunit alpha OS=Rattus norvegicus GN=Gnao1 PE=1 SV=2 - [GNAO_RAT]	1570.68	0	0	1.06114e+09	6.29991e+08	5.14874e+08	548712486	595455572	133007238	5.58119e+08	0	6.298e+08	5.64902e+08	39.91	31.18	56.62	53.22	65.28	65.29	75.36	79.79	57.92		73.15	76.63	0.00017356	0.00125743	3.15768e-06	7.6229e-06	4.44725e-07	4.73282e-07	4.075e-08	1.62679e-08	2.42154e-06		7.74676e-08	3.36769e-08	2	2	2	2	2	2	2	2	2
MEDTEPFSAELLSAMMR		P59215	Guanine nucleotide-binding protein G(o) subunit alpha OS=Rattus norvegicus GN=Gnao1 PE=1 SV=2 - [GNAO_RAT]	1957.87	0	0	2.75647e+08	1.83844e+08	8.26884e+07	171024027	2.42319e+08	0	197312259	0	1.1807e+08	0			73.79	76.68	79.5	72.41	71.29		77.43		70.89				1.2326e-07	5.69175e-08	3.30995e-08	1.69364e-07	1.969e-07		4.96973e-08		2.15897e-07				2	2	2	2	2		2
MEDTEPFSAELLSAMMR	M16(Oxidation)	P59215	Guanine nucleotide-binding protein G(o) subunit alpha OS=Rattus norvegicus GN=Gnao1 PE=1 SV=2 - [GNAO_RAT]	1973.86	0	0	5.90813e+07	24554237	2.1534e+07	3.20255e+07	32044790	0	2.26462e+07	2.30503e+07	4.46496e+07	0	41.82		64.94	63.14	93.94	66.81	64.4		74.31	63.12	91.03		0.000151261		6.89348e-07	1.04337e-06	8.67838e-10	4.48166e-07	7.80618e-07		7.96964e-08	1.04819e-06	1.77494e-09		2		2	2	2	2	2		2
MVCDVVSR	C3(Methylthio)	P59215	Guanine nucleotide-binding protein G(o) subunit alpha OS=Rattus norvegicus GN=Gnao1 PE=1 SV=2 - [GNAO_RAT]	954.421	54029458	1.89341e+07	420636647	2.34928e+08	0	141066544	2.93968e+08	3.72627e+07	2.48015e+08	2.0128e+08	2.71002e+08	2.41164e+08	30.13	52.91	52.5	55.11		57.21	52.8	52.95	51.26	53.34	53.94	50.66	0.00135871	6.14018e-06	6.18575e-06	3.69983e-06		2.85162e-06	7.87211e-06	6.08389e-06	1.12225e-05	5.56136e-06	6.05468e-06	1.15967e-05	2	2	2	2		2	2	2	2
NLKEDGISAAK		P59215	Guanine nucleotide-binding protein G(o) subunit alpha OS=Rattus norvegicus GN=Gnao1 PE=1 SV=2 - [GNAO_RAT]	1145.62	0	1.03705e+07	99056288	0	0	9.21726e+07	1.17984e+08	2.56445e+06	1.7525e+08	0	4.18667e+07	4.52776e+07		49.42	56.96			50.63	48.86	50.18	47.63		49.95	54.29		5.54296e-05	1.08741e-05			4.58433e-05	6.8909e-05	5.08482e-05	9.31952e-05		4.90616e-05	1.97368e-05		2	2			2	2	2	2
NLKEDGISAAKDVK		P59215	Guanine nucleotide-binding protein G(o) subunit alpha OS=Rattus norvegicus GN=Gnao1 PE=1 SV=2 - [GNAO_RAT]	1487.81	0	0	4.26666e+08	0	0	0	29584804	4.66426e+07	0	2.32879e+08	0	2.24391e+08	38.15		49.74	37.71	52.58	39.81	54.86	76.07	41.31	54.14		77.85	0.000811476		5.36156e-05	0.000847169	2.76039e-05	0.000459677	1.73092e-05	1.31001e-07	0.000369803	1.92739e-05		8.20295e-08	3		2	3	3	3	2	2	3
QYKPVVYSNTIQSLAAIVR		P59215	Guanine nucleotide-binding protein G(o) subunit alpha OS=Rattus norvegicus GN=Gnao1 PE=1 SV=2 - [GNAO_RAT]	2150.2	0	0	0	0	0	29305130	183859295	0	6.31789e+07	5.58449e+07	6.64024e+07	0						53.63	84.28		50.79	76.76	43.07							1.56064e-05	1.32504e-08		3.04294e-05	7.59106e-08	0.000202201							2	2		2
SKAIEKNLKEDGISAAK		P59215	Guanine nucleotide-binding protein G(o) subunit alpha OS=Rattus norvegicus GN=Gnao1 PE=1 SV=2 - [GNAO_RAT]	1802	0	0	3.88248e+07	1.05537e+07	0	1.82609e+07	0	6.41492e+06	0	1.47439e+07	0	0			39.05	31.06		46.31		37.03		42.87					0.000472916	0.00309455		8.88758e-05		0.00075298		0.000203984					3	3		3		3
SREYQLNDSAK		P59215	Guanine nucleotide-binding protein G(o) subunit alpha OS=Rattus norvegicus GN=Gnao1 PE=1 SV=2 - [GNAO_RAT]	1310.63	0	2.00879e+07	1.06593e+08	0	0	0	0	0	0	0	0	4.47742e+07		35.78	43.94									30.81		0.0010966	0.000173568									0.00340239		2	2
YYLDSLDR		P59215	Guanine nucleotide-binding protein G(o) subunit alpha OS=Rattus norvegicus GN=Gnao1 PE=1 SV=2 - [GNAO_RAT]	1044.5	0	8.54947e+06	0	126624199	27153751	9.80311e+07	0	0	197087297	70802484	0	1.53628e+07		38.15		41.4	46.64	40.59			30.97	36.03		39.63		0.000275596		0.000130398	3.90187e-05	0.000174594			0.00135972	0.000449027		0.000179673		2		2	2	2			2
YYLDSLDRIGAADYQPTEQDILR		P59215	Guanine nucleotide-binding protein G(o) subunit alpha OS=Rattus norvegicus GN=Gnao1 PE=1 SV=2 - [GNAO_RAT]	2715.32	0	0	0	1.16411e+08	8.89538e+07	1.18574e+08	0	6.16122e+07	7.97314e+07	8.23055e+07	4.88496e+07	0				43.71	53.89	46.67		41.52	45.41	49.33	44.01					0.000346863	3.24614e-05	0.000174375		0.000574325	0.00022156	9.68452e-05	0.000331655					3	3	3		3	3
SLWNDPGIQECYDR	C11(Methylthio)	P82471	Guanine nucleotide-binding protein G(q) subunit alpha OS=Rattus norvegicus GN=Gnaq PE=1 SV=2 - [GNAQ_RAT]	1741.73	0	0	7.55515e+07	56555633	3.6196e+07	0	4.73537e+07	0	0	4.13383e+07	0	3.75653e+07			51.47	47.96	36.67		47.09			41.75		63.74			1.28314e-05	2.39934e-05	0.000279862		2.93151e-05			9.35681e-05		5.91736e-07			2	2	2		2
VRVPTTGIIEYPFDLQSVIFR		P82471	Guanine nucleotide-binding protein G(q) subunit alpha OS=Rattus norvegicus GN=Gnaq PE=1 SV=2 - [GNAQ_RAT]	2450.34	0	0	6.32785e+07	0	0	3.19615e+07	0	0	0	0	0	3.84645e+07			71.44			37.48						43.61			2.00982e-07			0.000482352						0.000117588			3			3
ARFEELNADLFR		P63018	Heat shock cognate 71 kDa protein OS=Rattus norvegicus GN=Hspa8 PE=1 SV=1 - [HSP7C_RAT]	1480.75	0	0	66642709	5.07834e+07	3.55316e+07	0	8.55751e+07	0	6.88253e+07	3.71829e+07	0	0			66.82	78.37	75.14		78.15		78.71	71.69					9.87856e-07	6.91343e-08	1.33195e-07		7.34922e-08		5.85449e-08	2.94774e-07					2	2	2		2		2
DAGTIAGLNVLR		P63018	Heat shock cognate 71 kDa protein OS=Rattus norvegicus GN=Hspa8 PE=1 SV=1 - [HSP7C_RAT]	1199.68	0	0	0	1.08609e+08	60314617	79798550	0	0	8.03297e+07	0	83764526	7.37381e+07				73.7	61.87	72.69			68.33		74.22	61.58				1.3224e-07	2.73054e-06	1.66864e-07			4.55367e-07		1.11641e-07	2.15458e-06				2	2	2			2
FDDAVVQSDMKHWPFMVVNDAGRPK		P63018	Heat shock cognate 71 kDa protein OS=Rattus norvegicus GN=Hspa8 PE=1 SV=1 - [HSP7C_RAT]	2889.38	0	0	0	92143401	115739854	0	48305038	0	0	0	1.31366e+08	108921120				38.9	32.51		38.03		48.74		31.48	32.1				0.00102416	0.00448838		0.0012828		0.000106928		0.00579639	0.00499442				4	4		4		3
HWPFMVVNDAGRPK		P63018	Heat shock cognate 71 kDa protein OS=Rattus norvegicus GN=Hspa8 PE=1 SV=1 - [HSP7C_RAT]	1653.83	0	0	191563294	176791467	99408756	0	1.7634e+08	0	1.69943e+08	0	1.39315e+08	0			49.88	58.13	40.89	38.58	43.73		43.2	45.85	45.77	46.13			7.40172e-05	1.10747e-05	0.000586587	0.000887524	0.000266895		0.000344614	0.000187211	0.000190692	0.000163333			3	3	3	3	3		3
IINEPTAAAIAYGLDKK		P63018	Heat shock cognate 71 kDa protein OS=Rattus norvegicus GN=Hspa8 PE=1 SV=1 - [HSP7C_RAT]	1787.99	0	0	0	0	74448532	1.95614e+08	354004482	31473175	3.87039e+08	132253418	3.32177e+08	0			77.02	77.16	69.1	76.74	76.7	60.77	61.01	76.09	80.11	78.91			8.73882e-08	7.98083e-08	4.55199e-07	8.7912e-08	8.87254e-08	3.22449e-06	3.17001e-06	1.02105e-07	4.04621e-08	4.94835e-08			2	2	3	3	3	3	3
ITITNDKGR		P63018	Heat shock cognate 71 kDa protein OS=Rattus norvegicus GN=Hspa8 PE=1 SV=1 - [HSP7C_RAT]	1017.57	0	4.11337e+06	0	0	0	2.65783e+07	2.98502e+07	0	0	0	2.01097e+07	0		46.01				48.31	57.88				44.98			0.000130318				7.67367e-05	8.47234e-06				0.000165197			2				2	2
LDKSQIHDIVLVGGSTR		P63018	Heat shock cognate 71 kDa protein OS=Rattus norvegicus GN=Hspa8 PE=1 SV=1 - [HSP7C_RAT]	1838.01	0	0	3.38642e+07	8.1491e+07	0	0	3.87636e+07	0	9.32938e+07	1.50986e+07	2.317e+07	0			63.45	73.15		47.1	56.04		73.71	88.08	59.86				1.51372e-06	1.47673e-07		6.2395e-05	6.84436e-06		1.36191e-07	5.52368e-09	2.84009e-06				2	2		3	2		2
LLQDFFNGKELNK	N7(Deamidated)	P63018	Heat shock cognate 71 kDa protein OS=Rattus norvegicus GN=Hspa8 PE=1 SV=1 - [HSP7C_RAT]	1566.82	0	0	9.18045e+07	21791859	0	4.60969e+07	0	0	1.14442e+08	4.05724e+07	0	0			35.22	50.48		42.39	43.99		48.81	30.04					0.0015331	4.43206e-05		0.000288383	0.000223454		6.51036e-05	0.00495416					2	2		2	3		2
LSKEDIER		P63018	Heat shock cognate 71 kDa protein OS=Rattus norvegicus GN=Hspa8 PE=1 SV=1 - [HSP7C_RAT]	989.526	0	1.83985e+07	9.483e+07	0	57736724	1.09577e+08	7.67589e+07	0	1.12886e+08	7.70602e+07	4.81509e+07	4.45474e+07		49.95	52.62	45.2	40	52.04	52.42		54.93	42.32	50.81	40.73		5.81658e-05	3.14534e-05	0.000173647	0.000565	3.59474e-05	3.29358e-05		1.84785e-05	0.000337029	4.77164e-05	0.000486035		2	2	2	2	2	2		2
MKEIAEAYLGK		P63018	Heat shock cognate 71 kDa protein OS=Rattus norvegicus GN=Hspa8 PE=1 SV=1 - [HSP7C_RAT]	1252.66	6.39342e+07	0	0	1.27101e+08	0	9.51041e+07	0	4.48628e+07	151495321	1.03908e+08	1.19585e+08	0	55.7			59.38		49.85		56.88	60.56	47.82	59.63		1.26502e-05			5.36356e-06		4.86517e-05		9.64046e-06	4.08745e-06	7.10344e-05	4.79129e-06		2			2		2		2	2
NQVAMNPTNTVFDAK		P63018	Heat shock cognate 71 kDa protein OS=Rattus norvegicus GN=Hspa8 PE=1 SV=1 - [HSP7C_RAT]	1649.8	0	1.55505e+07	1.22874e+08	0	9.10429e+07	84727944	0	0	0	6.50636e+07	0	0		69.44	59.94		41.48	71.28				52.47				6.42759e-07	5.82999e-06		0.000401836	4.13326e-07				3.14263e-05				2	2		2	2
NQVAMNPTNTVFDAK	M5(Oxidation)	P63018	Heat shock cognate 71 kDa protein OS=Rattus norvegicus GN=Hspa8 PE=1 SV=1 - [HSP7C_RAT]	1665.79	0	1.48065e+07	0	0	0	4.59696e+07	52998422	0	5.56887e+07	3.1144e+07	0	30666138		80.96				57.36	57.04		54.88	89.52		41.3		3.56747e-08				8.1726e-06	9.19291e-06		1.46289e-05	5.19341e-09		0.000329883		2				2	2		2
NQVAMNPTNTVFDAKR		P63018	Heat shock cognate 71 kDa protein OS=Rattus norvegicus GN=Hspa8 PE=1 SV=1 - [HSP7C_RAT]	1805.89	0	0	240825097	0	1.54484e+08	0	0	0	1.6894e+08	0	0	4.67108e+07		63.43	107.19		105.2				112.68			120.46		3.40456e-06	1.54698e-10		2.40086e-10				4.10028e-11			6.74623e-12		3	2		2				2
NQVAMNPTNTVFDAKR	M5(Oxidation)	P63018	Heat shock cognate 71 kDa protein OS=Rattus norvegicus GN=Hspa8 PE=1 SV=1 - [HSP7C_RAT]	1821.89	0	1.19257e+07	108443122	62218590	0	7.34475e+07	54096659	0	0	4.91368e+07	7.65002e+07	6.45386e+07		85.73	53.35	65.37	83.56	79.05	76.21			73.22	79.19	77.71		1.99139e-08	3.65281e-05	2.14898e-06	3.37024e-08	9.52054e-08	1.72319e-07			3.4303e-07	8.67626e-08	1.26228e-07		3	3	3	2	3	3
QATKDAGTIAGLNVLR		P63018	Heat shock cognate 71 kDa protein OS=Rattus norvegicus GN=Hspa8 PE=1 SV=1 - [HSP7C_RAT]	1627.9	4.86316e+06	0	134044315	1.02787e+08	104955210	8.67428e+07	18010791	0	66405290	59984201	8.7412e+07	0	57.75		76.94	73.38	42.48	82.39	87.37	62.33	82.52	54.43	63.19	87.86	5.70793e-06		6.97942e-08	1.79087e-07	0.000192079	1.93217e-08	7.51249e-09	1.95905e-06	2.40696e-08	1.22597e-05	1.60711e-06	6.71095e-09	2		2	2	2	2	2	3	2
RFDDAVVQSDMK		P63018	Heat shock cognate 71 kDa protein OS=Rattus norvegicus GN=Hspa8 PE=1 SV=1 - [HSP7C_RAT]	1410.67	0	0	0	4.2021e+07	2.47306e+07	1.48694e+07	7.14681e+07	0	0	0	2.17534e+07	40109155				45.28	45.03	47.23	54.49				30.91	30.16				0.000121558	0.000128761	7.85323e-05	1.49365e-05				0.00364932	0.00404808				2	2	2	2
SFYPEEVSSMVLTK		P63018	Heat shock cognate 71 kDa protein OS=Rattus norvegicus GN=Hspa8 PE=1 SV=1 - [HSP7C_RAT]	1616.79	0	0	0	1.31516e+08	0	1.31335e+08	0	36117926	0	1.08711e+08	1.36758e+08	1.43578e+08				55.4		51.5		55.89		53.59	50.74	52.21				1.08151e-05		2.6548e-05		9.6612e-06		1.72821e-05	3.07817e-05	2.2544e-05				2		2		2
TTPSYVAFTDTER		P63018	Heat shock cognate 71 kDa protein OS=Rattus norvegicus GN=Hspa8 PE=1 SV=1 - [HSP7C_RAT]	1487.7	0	1.48392e+07	6.59041e+07	5.89653e+07	0	5.80498e+07	79284530	0	81075479	50048665	0	64720653		63.7	80.54	99.36		67.2	62.48		80.51	65.52		47.64		1.45037e-06	3.22324e-08	3.65015e-10		6.19275e-07	1.77955e-06		3.02328e-08	8.83712e-07		5.85435e-05		2	2	2		2	2		2
TVTNAVVTVPAYFNDSQR		P63018	Heat shock cognate 71 kDa protein OS=Rattus norvegicus GN=Hspa8 PE=1 SV=1 - [HSP7C_RAT]	1982	0	0	2.93568e+07	78883634	0	5.45984e+07	0	0	0	5.73176e+07	67512853	70818822			45.08	40.76		34.06				37.4	33	47.08			0.000194035	0.000549846		0.00231661				0.00113731	0.00328278	0.000128304			2	2		2
VQVEYKGETK		P63018	Heat shock cognate 71 kDa protein OS=Rattus norvegicus GN=Hspa8 PE=1 SV=1 - [HSP7C_RAT]	1180.62	0	2.37288e+07	1.53017e+08	3.97082e+07	0	7.74192e+07	7.55386e+07	6.15573e+06	0	6.25307e+07	5.5801e+07	0		36.74	41.18	44.07		44	39.64	37.93		45.83	40.83			0.000794385	0.000281969	0.000146903		0.000159243	0.000401977	0.000603992		9.79561e-05	0.000309764			2	2	2		2	2	2
IKVVNVELPVEANLVWQLGR		Q66HA8	Heat shock protein 105 kDa OS=Rattus norvegicus GN=Hsph1 PE=1 SV=1 - [HS105_RAT]	2276.31	0	0	1.10258e+08	0	0	0	0	0	0	59748499	5.75187e+07	2.36193e+07			65.6							60.11	62.62	89.58			2.7477e-07							9.7268e-07	5.4572e-07	1.21169e-09			3
NQQITHANNTVSSFKR		Q66HA8	Heat shock protein 105 kDa OS=Rattus norvegicus GN=Hsph1 PE=1 SV=1 - [HS105_RAT]	1844.94	0	0	74494006	2.19335e+07	3.287e+07	2.5995e+07	0	0	0	0	2.12979e+07	2.6947e+07			60.55	42.46	59.56	84.98					55.88	70.08			5.81492e-06	0.000402957	7.91236e-06	2.27146e-08					1.76885e-05	6.97041e-07			3	3	3	3
SVNEVMEWMNNVMNAQAKR		Q66HA8	Heat shock protein 105 kDa OS=Rattus norvegicus GN=Hsph1 PE=1 SV=1 - [HS105_RAT]	2251.04	0	0	1.92399e+07	0	1.90221e+07	0	0	0	0	1.39199e+07	1.13863e+07	0			67.36		70.91					87.03	30.13				1.02846e-06		4.74412e-07					1.15919e-08	0.00611421				3		3
VLEELGQR		Q66HA8	Heat shock protein 105 kDa OS=Rattus norvegicus GN=Hsph1 PE=1 SV=1 - [HS105_RAT]	943.52	0	1.24492e+07	0	0	0	3.79099e+07	2.56573e+07	0	24702574	2.36333e+07	0	0		36.17				36.18	33.61		38.34	30.19				0.000857489				0.000855516	0.00145896		0.000520269	0.00339804				2				2	2		2
AQLLQPTLEINPR		Q5XHZ0	Heat shock protein 75 kDa, mitochondrial OS=Rattus norvegicus GN=Trap1 PE=1 SV=1 - [TRAP1_RAT]	1492.85	0	0	0	1.58556e+08	1.11479e+08	1.02098e+08	1.91805e+08	0	1.94909e+08	7.13803e+07	104162096	0		85.07		98.71	98.47	94.75	87.83		95.07	61.84	93.64			4.97875e-09		3.16277e-10	3.34247e-10	5.35945e-10	2.63706e-09		4.97875e-10	1.14561e-06	1.01641e-09			2		2	2	2	2		2
ELISNASDALEKLR		Q5XHZ0	Heat shock protein 75 kDa, mitochondrial OS=Rattus norvegicus GN=Trap1 PE=1 SV=1 - [TRAP1_RAT]	1558.84	0	0	4.15546e+07	27720843	0	30448469	1.90957e+07	0	2.82974e+07	0	2.12935e+07	2.46342e+07			76.87	91.09		75.76	32.77		79.61		69.84	78.38			1.37745e-07	5.21284e-09		1.64586e-07	0.0028536		7.11072e-08		6.43268e-07	8.34964e-08			2	2		2	2		2
EREPELAQLLVDQIYENAMIAAGLVDDPR		Q5XHZ0	Heat shock protein 75 kDa, mitochondrial OS=Rattus norvegicus GN=Trap1 PE=1 SV=1 - [TRAP1_RAT]	3268.65	0	0	7.87354e+06	0	9.81821e+06	0	2.73844e+07	0	0	0	0	2.62888e+07			74.89		42.55		50.89					72.14			2.98392e-07		0.000505873		7.61749e-05					5.55957e-07			3		3		3
FILHYKTDAPLNIR		Q5XHZ0	Heat shock protein 75 kDa, mitochondrial OS=Rattus norvegicus GN=Trap1 PE=1 SV=1 - [TRAP1_RAT]	1700.95	0	0	2.0684e+07	0	0	0	0	0	0	0	1.232e+07	2.15664e+07			39.44							45.81	44.6	42.9			0.000403858							8.79113e-05	0.000126559	0.000200016			3
KLLDIVAR		Q5XHZ0	Heat shock protein 75 kDa, mitochondrial OS=Rattus norvegicus GN=Trap1 PE=1 SV=1 - [TRAP1_RAT]	927.597	0	0	0	6.39904e+07	5.987e+07	0	4.02004e+07	0	0	0	0	0				49.27	56.09	51.78	51.05									1.71541e-05	3.56753e-06	9.62427e-06	1.13859e-05									2	2	2	2
LNDLLVK		Q5XHZ0	Heat shock protein 75 kDa, mitochondrial OS=Rattus norvegicus GN=Trap1 PE=1 SV=1 - [TRAP1_RAT]	814.501	0	5.35442e+06	3.25413e+07	0	0	0	4.62529e+07	0	0	0	2.18578e+07	2.0283e+07		49.33	59.95				52.3				49.04	54.97		2.742e-05	2.37721e-06				1.38378e-05				2.93135e-05	7.48286e-06		2	2				2
SLYSEKEVFIR		Q5XHZ0	Heat shock protein 75 kDa, mitochondrial OS=Rattus norvegicus GN=Trap1 PE=1 SV=1 - [TRAP1_RAT]	1370.73	0	0	7.45821e+07	0	55183171	0	0	46155166	0	0	5.55652e+07	0			55.64		34.62		53.51	40.36			50.13				1.0643e-05		0.00160492		1.73806e-05	0.000358975			3.78499e-05				2		2		3	2
YESSALPAGQLTSLSDYASR		Q5XHZ0	Heat shock protein 75 kDa, mitochondrial OS=Rattus norvegicus GN=Trap1 PE=1 SV=1 - [TRAP1_RAT]	2116.02	0	0	0	3.44695e+07	2.89515e+07	3.11681e+07	32841673	0	3.82116e+07	2.58572e+07	39794312	0				40.22	61.39	89.06	55.66		59.52	61.86	67.62					0.000560857	4.7923e-06	7.63616e-09	1.6027e-05		6.36612e-06	3.90977e-06	9.85995e-07					2	2	2	2		2
HLEINPDHPIVETLR		P34058	Heat shock protein HSP 90-beta OS=Rattus norvegicus GN=Hsp90ab1 PE=1 SV=4 - [HS90B_RAT]	1782.95	0	0	2.64849e+08	2.11601e+07	1.63819e+08	0	1.98082e+08	0	209390732	1.16237e+08	180837551	0			71.26	45.97	99.79	53.91	49.11		57.38	61.72	92.36	63.53			4.33938e-07	0.000145435	5.82496e-10	2.33705e-05	6.81229e-05		1.05116e-05	3.83597e-06	3.31036e-09	2.37331e-06			2	2	2	3	2		2
HSQFIGYPITLYLEKER		P34058	Heat shock protein HSP 90-beta OS=Rattus norvegicus GN=Hsp90ab1 PE=1 SV=4 - [HS90B_RAT]	2094.1	0	0	0	30794645	0	0	3.3364e+07	0	0	1.95467e+07	0	0				54.98			58.32			61.58						2.22381e-05			1.10423e-05			4.96942e-06						3			3
AADHVEDLPGALSTLSDLHAHK		P01946	Hemoglobin subunit alpha-1/2 OS=Rattus norvegicus GN=Hba1 PE=1 SV=3 - [HBA_RAT]	2297.15	0	0	48721247	0	0	0	0	0	64310376	5.73784e+07	56247526	0			45.04			44.77			30.68	68.8	66.7	37.87			0.000202097			0.000211726			0.00551518	9.16188e-07	1.4645e-06	0.00106148			3			4			3
IGGHGGEYGEEALQR		P01946	Hemoglobin subunit alpha-1/2 OS=Rattus norvegicus GN=Hba1 PE=1 SV=3 - [HBA_RAT]	1572.74	0	0	294916861	1.47448e+08	0	2.0911e+08	0	0	1.79719e+08	1.42528e+08	0	1.84779e+08			39.36	35.64	42.68	52.59	60.08		70.35	53.17		54.5			0.000365015	0.000832338	0.000169946	1.76258e-05	3.09251e-06		2.9061e-07	1.54223e-05		1.11766e-05			2	2	3	2	3		2
KVADALAK		P01946	Hemoglobin subunit alpha-1/2 OS=Rattus norvegicus GN=Hba1 PE=1 SV=3 - [HBA_RAT]	815.498	0	2.71786e+07	0	3.37386e+07	0	0	0	1.36142e+06	0	4.34419e+07	0	1.82702e+07		51.09		54.66				48.01		59.98		51.83		3.50116e-05		1.53891e-05				7.11562e-05		4.52077e-06		2.95265e-05		2		2				2
MFAAFPTTK		P01946	Hemoglobin subunit alpha-1/2 OS=Rattus norvegicus GN=Hba1 PE=1 SV=3 - [HBA_RAT]	1013.51	9.88425e+07	5.00793e+07	4.97322e+08	520460466	4.72178e+08	4.15177e+08	5.92717e+08	2.15096e+07	539876186	345532632	392315007	3.67199e+08	45.46	61.37	48.94	62.1	46.2	49.05	49.01	48.79	48.96	49.02	46	56.07	6.25781e-05	1.60481e-06	2.80817e-05	1.81896e-06	5.15749e-05	3.67132e-05	3.14007e-05	3.89782e-05	2.73173e-05	3.19551e-05	5.52615e-05	7.29159e-06	2	2	2	2	2	2	2	2	2
TYFSHIDVSPGSAQVK		P01946	Hemoglobin subunit alpha-1/2 OS=Rattus norvegicus GN=Hba1 PE=1 SV=3 - [HBA_RAT]	1735.87	0	0	432996284	0	0	140212798	2.31084e+08	0	0	0	2.52266e+08	0		36.81	36.86	32.7	42.83	37.34	46.45		44.17	52.18	36.9	40.96		0.00169886	0.00171032	0.00429625	0.000416956	0.00154981	0.000181172		0.000317745	4.99406e-05	0.00149047	0.000645351		3	2	2	3	2	2		3
VLSADDKTNIK		P01946	Hemoglobin subunit alpha-1/2 OS=Rattus norvegicus GN=Hba1 PE=1 SV=3 - [HBA_RAT]	1203.66	0	4.54788e+07	3.25814e+08	0	0	1.59773e+08	0	0	2.72901e+08	1.41553e+08	1.36648e+08	131668675		48.77	54.26	54.16		54.34	62.46		41.99	54.18	53.89	54.42		5.30958e-05	1.57489e-05	1.53483e-05		1.4357e-05	2.27018e-06		0.000265613	1.54687e-05	1.63328e-05	1.46371e-05		2	2	3		2	3		2
AAVNGLWGKVNPDDVGGEALGR	N4(Deamidated)	P02091	Hemoglobin subunit beta-1 OS=Rattus norvegicus GN=Hbb PE=1 SV=3 - [HBB1_RAT]	2196.1	0	0	63154108	1.01181e+08	0	8.61318e+07	0	0	7.68303e+07	7.05744e+07	0	0			35.96	59.6	94.02	58.86			69.46	42.96	66				0.0020281	8.88147e-06	3.1306e-09	1.02713e-05			9.51216e-07	0.000422364	2.03463e-06				3	3	2	3			3
LLVVYPWTQR		P02091	Hemoglobin subunit beta-1 OS=Rattus norvegicus GN=Hbb PE=1 SV=3 - [HBB1_RAT]	1274.73	4.6089e+07	0	0	612050950	0	2.95485e+08	4.67932e+08	0	533752214	4.2238e+08	506954110	4.78475e+08	42.02			44.45		43.4	57.53		47.26	55.64	54.73	47.16	0.000197838			0.00011306		0.000143983	5.56302e-06		5.91985e-05	8.59628e-06	1.21144e-05	5.19235e-05	2			2		2	2		2
VHLTDAEK		P02091	Hemoglobin subunit beta-1 OS=Rattus norvegicus GN=Hbb PE=1 SV=3 - [HBB1_RAT]	912.478	0	1.8711e+07	0	0	0	7.03141e+07	0	0	0	7.45481e+07	0	0		31.06				32.52				31.43				0.00184106				0.00131543				0.00169071				2				2
YFDSFGDLSSASAIMGNPK		P02091	Hemoglobin subunit beta-1 OS=Rattus norvegicus GN=Hbb PE=1 SV=3 - [HBB1_RAT]	2006.92	0	0	0	7.88562e+07	66888638	0	1.0248e+08	9.07046e+07	9.05963e+07	7.03637e+07	7.30084e+07	0				35.21	71.13		35.72	31.7	57	51.86	53.09					0.00112988	2.89089e-07		0.00100469	0.00250151	6.98342e-06	2.37844e-05	1.76727e-05					2	2		2	2	2
DYNPTASVK		P05708	Hexokinase-1 OS=Rattus norvegicus GN=Hk1 PE=1 SV=4 - [HXK1_RAT]	994.484	0	0	6.65424e+07	0	0	101306620	1.67343e+08	0	0	5.75455e+07	3.96416e+07	45391253			37.99			41.65	35.66			40.36	37.55	30.63			0.000555991			0.000239369	0.000950754			0.000308351	0.000571325	0.00302739			2			2	2
EGLLFEGR		P05708	Hexokinase-1 OS=Rattus norvegicus GN=Hk1 PE=1 SV=4 - [HXK1_RAT]	920.484	0	0	0	0	0	1.5024e+07	2.23353e+07	0	3.5228e+07	0	0	0						65.96	65.91		68.73									1.06475e-06	1.10273e-06		5.62664e-07									2	2		2
FKASGVEGADVVK		P05708	Hexokinase-1 OS=Rattus norvegicus GN=Hk1 PE=1 SV=4 - [HXK1_RAT]	1306.7	0	5.85852e+06	0	0	0	3.56028e+07	74166269	0	91489485	0	34371692	0		57.85				43.52	58.32		52.39		37.15			7.05454e-06				0.000197861	6.55179e-06		2.56661e-05		0.000828836			2				2	2		2
FLSQIESDRLALLQVR		P05708	Hexokinase-1 OS=Rattus norvegicus GN=Hk1 PE=1 SV=4 - [HXK1_RAT]	1888.06	0	0	0	38456807	0	0	0	0	0	2.19478e+07	3.95955e+07	0				43.25			41.01			36.25	32.09	36.96				0.000144311			0.000245675			0.000652128	0.00176135	0.000553774				3			2
GAAMVTAVAYR		P05708	Hexokinase-1 OS=Rattus norvegicus GN=Hk1 PE=1 SV=4 - [HXK1_RAT]	1109.58	0	0	0	42672908	0	0	9.77022e+07	0	63498944	3.77677e+07	65356352	0				52.39			75.33		72.84	52.77	75.1					2.68196e-05			1.36287e-07		1.68999e-07	1.71745e-05	1.42154e-07					2			2		2
GKFNTSDVSAIEKDKEGIQNAK		P05708	Hexokinase-1 OS=Rattus norvegicus GN=Hk1 PE=1 SV=4 - [HXK1_RAT]	2379.21	6.03657e+07	0	0	197925950	0	179302818	0	3.74998e+07	4.99781e+08	0	0	0	44.07			88		67.43		78.66	49.5				0.000297724			1.20452e-08		1.51803e-06		1.13e-07	8.41514e-05				3			3		3		3	3
GLDHLNVTVGVDGTLYK		P05708	Hexokinase-1 OS=Rattus norvegicus GN=Hk1 PE=1 SV=4 - [HXK1_RAT]	1800.95	0	0	0	4.05263e+07	0	0	2.76403e+07	2.6362e+07	4.63888e+07	2.81453e+07	1.90211e+07	0				41.18			55.34	58.13	39.53	43.92	61.73					0.000415333			1.50594e-05	8.38294e-06	0.000607291	0.000202754	3.69286e-06					2			2	2	2
GQISEPLKTR		P05708	Hexokinase-1 OS=Rattus norvegicus GN=Hk1 PE=1 SV=4 - [HXK1_RAT]	1128.64	0	0	0	2.62905e+07	1.58296e+07	3.15076e+07	43458710	0	72111645	1.80385e+07	1.78924e+07	1.66173e+07				61.76	44.87	55.44	55.2		60.38	56.39	54.64	58.04				2.60055e-06	0.000133593	1.1859e-05	1.23818e-05		3.71069e-06	8.95498e-06	1.33988e-05	6.12441e-06				2	2	2	2		2
HIDLVEGDEGR		P05708	Hexokinase-1 OS=Rattus norvegicus GN=Hk1 PE=1 SV=4 - [HXK1_RAT]	1239.6	0	0	0	0	5.80563e+07	165309974	145740709	0	201509168	1.16573e+08	0	1.01964e+08					67.54	71.75	71.68	56.42	55.17	74.31		66.93					5.19783e-07	2.53971e-07	2.54701e-07	8.6653e-06	1.15554e-05	1.40859e-07		5.98166e-07					2	2	2	2	2
IDEAVLITWTKR		P05708	Hexokinase-1 OS=Rattus norvegicus GN=Hk1 PE=1 SV=4 - [HXK1_RAT]	1444.82	0	0	2.37162e+07	0	0	1.31032e+07	36225556	3.08995e+07	0	0	3.09062e+07	0			55.02			39.34	77.44	77.48			90.67				9.91541e-06			0.000314314	4.9583e-08	4.91284e-08			2.35685e-09				2			2	2	2
IMHQTVKELSPK		P05708	Hexokinase-1 OS=Rattus norvegicus GN=Hk1 PE=1 SV=4 - [HXK1_RAT]	1410.78	2.94578e+07	0	0	4.82263e+07	72334558	0	2.26339e+07	0	43115038	3.58108e+07	4.53929e+07	4.97937e+07	47.09		58.19	38.37	62.39	58.33	41.73	54.48	56.64	64.57	53.17	42.93	8.11051e-05		5.15797e-06	0.000604016	2.59545e-06	6.09604e-06	0.000275286	1.49709e-05	9.10436e-06	1.46639e-06	2.00008e-05	0.000208826	2		3	2	2	3	2	3	2
ITPELLTR		P05708	Hexokinase-1 OS=Rattus norvegicus GN=Hk1 PE=1 SV=4 - [HXK1_RAT]	942.558	59479844	7.21976e+07	6.42388e+08	5.3404e+08	408916168	5.24995e+08	0	1.64246e+07	839800512	344752535	421794565	321491604	44.36	55.33	57.12	57.92	60.16	55.96		46.02	51.33	56.56	59.42	50.51	7.51197e-05	6.00833e-06	3.97882e-06	3.148e-06	2.265e-06	5.95755e-06		5.12571e-05	1.50922e-05	5.18881e-06	2.8572e-06	1.82286e-05	2	2	2	2	2	2		2	2
KGFLFR		P05708	Hexokinase-1 OS=Rattus norvegicus GN=Hk1 PE=1 SV=4 - [HXK1_RAT]	767.456	0	0	0	1.32723e+07	0	0	32502747	0	3.02305e+07	0	1.6379e+07	0				38.97			31.44		42.07		37.49					0.000234516			0.00132792		0.000114861		0.00032974					2			2		2
KLPVGFTFSFPCR	C12(Methylthio)	P05708	Hexokinase-1 OS=Rattus norvegicus GN=Hk1 PE=1 SV=4 - [HXK1_RAT]	1544.77	0	0	0	7.69285e+07	0	1.73059e+07	0	0	0	47924805	6.31321e+07	4.42477e+07			77.19	49.94		39.72	90.8		84.88	42.57	38.27	51.99			1.01222e-07	5.17095e-05		0.000543964	4.44994e-09		1.73922e-08	0.000290509	0.000804255	3.2253e-05			2	3		3	2		2
LAEQHRQIEETLAHFR		P05708	Hexokinase-1 OS=Rattus norvegicus GN=Hk1 PE=1 SV=4 - [HXK1_RAT]	1978.02	0	0	142136056	1.36475e+08	0	0	0	0	113136893	0	0	0			67.87	45.83			32.49	53.96	63.7						1.31461e-06	0.00019983			0.00431183	3.0737e-05	3.26333e-06						3	3			4	4	3
LPVGFTFSFPCR	C11(Methylthio)	P05708	Hexokinase-1 OS=Rattus norvegicus GN=Hk1 PE=1 SV=4 - [HXK1_RAT]	1416.68	0	0	0	0	0	0	0	0	9.0568e+06	0	1.60452e+07	1.3402e+07									65.48		73.58	73.36									9.7683e-07		1.46908e-07	1.59155e-07									2
LRTTVGVDGSLYK		P05708	Hexokinase-1 OS=Rattus norvegicus GN=Hk1 PE=1 SV=4 - [HXK1_RAT]	1408.78	7.41029e+07	0	184472396	0	0	0	0	4.52564e+07	0	0	0	0	39.31	40.9	44.48					46.4					0.000246161	0.000170694	0.000115847					5.72717e-05					2	2	2					2
LSDEILIDILTR		P05708	Hexokinase-1 OS=Rattus norvegicus GN=Hk1 PE=1 SV=4 - [HXK1_RAT]	1400.8	0	0	1.09988e+07	0	0	0	30031033	0	13289289	0	0	0			92.27				88.18		47.65						2.01595e-09				5.16986e-09		6.18447e-05						2				2		2
LSKQTLMEVK		P05708	Hexokinase-1 OS=Rattus norvegicus GN=Hk1 PE=1 SV=4 - [HXK1_RAT]	1176.67	0	2810709	0	3.40277e+07	0	0	0	0	4.70903e+07	0	3.61312e+07	0		43.42	51.52	47.12					40.43		47.05	48.02		0.000138771	3.06541e-05	8.34581e-05					0.000276248		6.01589e-05	6.78373e-05		2	3	2					2
LVPDSDVR		P05708	Hexokinase-1 OS=Rattus norvegicus GN=Hk1 PE=1 SV=4 - [HXK1_RAT]	900.478	0	3.69407e+07	1.66747e+08	1.59436e+08	135574605	2.66287e+08	352025797	0	387947675	1.3746e+08	0	0		46.73	44.72	41.73	43.22	45.26	45.14		46.73	53.8				5.6266e-05	8.0949e-05	0.000177929	0.000114343	6.99951e-05	7.34871e-05		5.09579e-05	1.1047e-05				2	2	2	2	2	2		2
MLPSFVR	M1(Oxidation)	P05708	Hexokinase-1 OS=Rattus norvegicus GN=Hk1 PE=1 SV=4 - [HXK1_RAT]	865.465	0	1.60027e+07	3.01817e+07	0	0	6.0052e+07	6.55295e+07	0	0	42948093	61108573	4.15397e+07		38.01	38.19			38	31.06			30.16	35.76	30.88		0.000411124	0.000477871			0.000427921	0.00203692			0.00303606	0.000862747	0.00220477		2	2			2	2
MLPSFVR		P05708	Hexokinase-1 OS=Rattus norvegicus GN=Hk1 PE=1 SV=4 - [HXK1_RAT]	849.465	1.28908e+08	5.88051e+07	0	8.69806e+08	8.90074e+08	0	1134644982	3.98887e+07	1015467127	6.63468e+08	9.2899e+08	722188700	34.06	38.41		38.36	38.26		38.23	36.68	38.27	36.03	38.15	38.24	0.00107977	0.000396582		0.000401174	0.000515014		0.000413364	0.000590653	0.000409574	0.000686014	0.000421049	0.000412413	2	2		2	2		2	2	2
MLPTFVR	M1(Oxidation)	P05708	Hexokinase-1 OS=Rattus norvegicus GN=Hk1 PE=1 SV=4 - [HXK1_RAT]	879.476	0	2.0121e+07	0	0	58470942	6.56206e+07	0	0	6.32816e+07	0	0	0		30.79			30.51	33.77			37.19					0.00229262			0.00306774	0.00115434			0.00052521					2			2	2			2
MLPTFVR		P05708	Hexokinase-1 OS=Rattus norvegicus GN=Hk1 PE=1 SV=4 - [HXK1_RAT]	863.48	0	9.12872e+07	1.50567e+09	1194212252	1063324704	0	1.53685e+09	4.31256e+07	1255654358	9.10695e+08	1227323516	974223602		38.69	37.37	36.39	38.58	34.49	36.51	33.55	33.7	38.78	35.94	36.29		0.00037182	0.000632148	0.000631441	0.000409093	0.00138696	0.000569561	0.00121432	0.00117309	0.000364194	0.000700378	0.000646149		2	2	2	2	2	2	2	2
MVSGMYMGELVR		P05708	Hexokinase-1 OS=Rattus norvegicus GN=Hk1 PE=1 SV=4 - [HXK1_RAT]	1372.64	0	0	0	0	2.38754e+07	0	4.03134e+07	0	61392815	2.5338e+07	0	5.6817e+07					72.21		49.77		63.99	59.85		81.63					1.80352e-07		2.95228e-05		1.15717e-06	2.8984e-06		1.9925e-08					2		2		2
QIEETLAHFR		P05708	Hexokinase-1 OS=Rattus norvegicus GN=Hk1 PE=1 SV=4 - [HXK1_RAT]	1243.64	0	0	178094075	8.72361e+07	0	0	0	0	147547361	0	0	0			55.31	66			32.33		66.14			32.22			1.16305e-05	7.15888e-07			0.00192981		6.68856e-07			0.0017094			2	2			3		2
RLVPDSDVR		P05708	Hexokinase-1 OS=Rattus norvegicus GN=Hk1 PE=1 SV=4 - [HXK1_RAT]	1056.58	0	0	2.99958e+08	2.25753e+08	0	268808500	0	0	4.03991e+08	0	0	146192547			45.04	40.84		39.01			35.86			42.62			0.000108098	0.000267845		0.00040821			0.000894992			0.000188721			2	2		2			2
SIPDGSEKGDFIALDLGGSSFR		P05708	Hexokinase-1 OS=Rattus norvegicus GN=Hk1 PE=1 SV=4 - [HXK1_RAT]	2268.12	4.6795e+07	0	2.5304e+08	127995759	82574548	194695049	2.13303e+08	1.45621e+08	52235456	1.02999e+08	1.73638e+08	2.14046e+08	35.13		78.85	65.64	59.56	77.36	73.74	73.81	71	52.03	58.79	73.32	0.0022097		9.77375e-08	2.0058e-06	8.46567e-06	1.34067e-07	3.23341e-07	2.99456e-07	5.44115e-07	4.2923e-05	9.84365e-06	3.42206e-07	2		2	2	2	2	2	2	2
SIPDGTEHGDFLALDLGGTNFR		P05708	Hexokinase-1 OS=Rattus norvegicus GN=Hk1 PE=1 SV=4 - [HXK1_RAT]	2332.12	0	0	3.00074e+07	0	0	0	0	0	3.52297e+07	0	0	2.1305e+07			61.84						60.02			52.08			4.25514e-06						6.37059e-06			4.08831e-05			2						2
TTVGVDGSLYK		P05708	Hexokinase-1 OS=Rattus norvegicus GN=Hk1 PE=1 SV=4 - [HXK1_RAT]	1139.59	0	1.45129e+08	413243803	0	0	0	0	3.09795e+07	0	0	0	101187053		67.99	68.27					68.14				67.98		5.40106e-07	5.06383e-07					5.2177e-07				5.41351e-07		2	2					2
[truncated: 1,081 more rows]
[truncated: 15 more columns]
