# Supplementary material for: Synthesis and protein binding studies of a peptide fragment of clathrin assembly protein AP180 bearing an O-linked β-N-acetylglucosaminyl-6-phosphate modification
Source: Royal Society of Chemistry journal article supplement (doi:10.1039/c2ob07139h), 2012-01-01
Supplement: c2ob07139h_2.xlsx [file c2ob07139h_2.xlsx]

## Sheet: Sheet1
		Sum of all Peptide Areas													Average Area					Significance Tests
Accession	Protein	Ba: Area	Bb: Area	Bc: Area	1a: Area	1b: Area	1c: Area	2a: Area	2b: Area	2c: Area	3a: Area	3b: Area	3c: Area		Beads alone	Unmodified, 1	O-GlcNAc, 2	O-GlcNAc-P, 3		TTEST B vs 1	TTEST B vs 2	TTEST B vs 3	TTEST 1 vs 2	TTEST 2 vs 3	TTEST 1 vs 3
B0BNF1	Septin-8 OS=Rattus norvegicus GN=Sept8 PE=1 SV=1 - [SEPT8_RAT]	0	1.83576e+07	6.66625e+07	4.11948e+08	2.32472e+08	1.61344e+08	4.96676e+08	2.80972e+08	7.07779e+08	3.12116e+08	5.83808e+08	0		2.834e+07	2.68588e+08	4.95142e+08	2.98641e+08		0.0178784	0.0100582	1	0.0953994	0.200047	0.439223
B0K020	CDGSH iron-sulfur domain-containing protein 1 OS=Rattus norvegicus GN=Cisd1 PE=3 SV=1 - [CISD1_RAT]	0	1.06996e+07	3.25079e+08	1.78299e+08	1.03443e+08	7.24494e+07	122148018	3.21162e+08	2.58076e+08	1.47796e+08	3.27054e+08	5.18018e+08		1.11926e+08	1.18064e+08	2.33796e+08	3.30956e+08		0.479306	0.186689	0.110233	0.0786201	0.235127	0.0643116
B2GV06	Succinyl-CoA:3-ketoacid-coenzyme A transferase 1, mitochondrial OS=Rattus norvegicus GN=Oxct1 PE=1 SV=1 - [SCOT1_RAT]	4.20437e+06	4.79898e+07	3.68399e+08	1.52624e+08	2.17535e+08	2.5535e+08	2.43262e+08	4.17419e+07	3.33286e+08	2.09931e+08	198420649	1.5495e+08		1.40198e+08	2.08503e+08	2.06097e+08	1.87767e+08		0.297835	0.335014	0.351393	0.490113	0.422417	0.289327
B2RYW9	Fumarylacetoacetate hydrolase domain-containing protein 2 OS=Rattus norvegicus GN=Fahd2 PE=1 SV=1 - [FAHD2_RAT]	0	0	166939616	2.33221e+08	1.19574e+08	1.26783e+08	2.94794e+08	6.36058e+07	1.65112e+08	1.41822e+08	1.43557e+08	125262300		5.56465e+07	1.59859e+08	1.74504e+08	1.36881e+08		0.096561	0.121871	0.110087	0.428597	0.302606	0.285096
B3GNI6	Septin-11 OS=Rattus norvegicus GN=Sept11 PE=1 SV=1 - [SEP11_RAT]	0	1.84197e+07	3.6916e+08	3.40677e+08	1.06958e+08	8.59422e+07	1.29819e+08	9.26351e+07	3.29964e+08	9.06197e+07	1.20535e+08	3.15898e+08		1.29193e+08	1.77859e+08	1.84139e+08	1.75684e+08		0.377186	0.358227	0.377694	0.4786	0.468984	0.492446
O08651	D-3-phosphoglycerate dehydrogenase OS=Rattus norvegicus GN=Phgdh PE=1 SV=3 - [SERA_RAT]	0	3.1836e+07	297086224	9.5937e+07	2.29194e+08	1.09098e+08	235984919	6.78186e+07	3.21346e+08	1.02652e+07	2.23779e+08	2.835e+08		1.09641e+08	1.44743e+08	2.08383e+08	1.72515e+08		0.375519	0.228519	0.321329	0.249481	0.381867	0.390214
O08838	Amphiphysin OS=Rattus norvegicus GN=Amph PE=1 SV=1 - [AMPH_RAT]	8.95719e+06	0	77980409	1.16674e+08	1.06288e+08	1.80077e+08	1.36675e+08	0	1.63644e+08	1.43326e+08	2.04541e+07	2.41363e+07		2.89792e+07	1.34346e+08	1.00106e+08	6.26388e+07		0.0177226	0.137643	0.257931	0.285853	0.296967	0.0988854
O08839	Myc box-dependent-interacting protein 1 OS=Rattus norvegicus GN=Bin1 PE=1 SV=1 - [BIN1_RAT]	0	0	0	9.55362e+07	8.2603e+07	2.15436e+07	8.86912e+07	3.01496e+07	2.54527e+07	6.46018e+07	8.4769e+07	1.41743e+08		0	6.65609e+07	4.80978e+07	9.70381e+07		0.0216809	0.0386427	0.00684194	0.28921	0.0935124	0.200514
O35094	Mitochondrial import inner membrane translocase subunit TIM44 OS=Rattus norvegicus GN=Timm44 PE=2 SV=1 - [TIM44_RAT]	0	0	6.84011e+07	5.73751e+07	3.20547e+07	15905491	3.94092e+07	0	4.8265e+07	1.67199e+07		4.43653e+07		2.28004e+07	3.51118e+07	2.92247e+07	3.05426e+07		0.32905	0.412448	0.409979	0.386782	0.477744	0.411265
O35179	Endophilin-A1 OS=Rattus norvegicus GN=Sh3gl2 PE=1 SV=2 - [SH3G2_RAT]	0	1.62827e+07	4.96766e+08	3.89264e+08	2.64404e+08	3.3463e+08	529143952	1.59446e+07	3.88491e+08	311774825	3.74315e+08	2.55564e+08		1.71016e+08	3.29433e+08	3.11193e+08	3.13885e+08		0.198143	0.282351	0.21963	0.456643	0.493567	0.385289
O35244	Peroxiredoxin-6 OS=Rattus norvegicus GN=Prdx6 PE=1 SV=3 - [PRDX6_RAT]	1.67476e+07	0	1.75342e+08	7.82635e+07	2.3058e+08	1.49458e+08	1.20847e+08	7.34643e+07	1.09086e+08	7.79376e+07	1.50205e+08	139952424		6.40299e+07	1.52767e+08	1.01132e+08	1.22698e+08		0.140077	0.277455	0.192676	0.163385	0.232225	0.288005
O35964	Endophilin-A2 OS=Rattus norvegicus GN=Sh3gl1 PE=1 SV=1 - [SH3G1_RAT]	0	0	153113451	0	47144698	6.20779e+07	1.03543e+08	0	6.23811e+07	9.15313e+07	1.02564e+08	0		51037817	3.64075e+07	5.53079e+07	6.46983e+07		0.400565	0.473004	0.416229	0.311031	0.421247	0.246312
O55171	Acyl-coenzyme A thioesterase 2, mitochondrial OS=Rattus norvegicus GN=Acot2 PE=1 SV=1 - [ACOT2_RAT]	0	0	2.90295e+08	1.31393e+08	8.22592e+07	1.73722e+08	1.3253e+08	0	1.78984e+08	7.127e+07	8.59106e+07	6.58777e+07		9.67652e+07	1.29125e+08	1.03838e+08	7.43528e+07		0.381578	0.476045	0.414261	0.347028	0.306897	0.056661
O70351	3-hydroxyacyl-CoA dehydrogenase type-2 OS=Rattus norvegicus GN=Hsd17b10 PE=1 SV=3 - [HCD2_RAT]	0	0	7.92072e+07	5.39394e+07	4.42735e+07	0	8.1217e+07	0	81357403	6.53538e+07	4.7501e+07	2.94203e+07		2.64024e+07	3.27376e+07	5.41915e+07	4.7425e+07		0.424479	0.25168	0.249892	0.268314	0.413521	0.247433
O88588	Phosphofurin acidic cluster sorting protein 1 OS=Rattus norvegicus GN=Pacs1 PE=2 SV=1 - [PACS1_RAT]	0	0	6.66551e+07	5.87956e+07	4.67824e+07	4.80029e+07	5.39173e+07	0	5.88365e+07	2.43219e+07	2.11251e+07	2.67317e+07		2.22184e+07	5.11937e+07	37584591	2.40596e+07		0.134032	0.3129	0.469051	0.259079	0.257057	0.00141164
O88778	Protein bassoon OS=Rattus norvegicus GN=Bsn PE=1 SV=3 - [BSN_RAT]	0	0	7.04798e+07	5.5192e+07	5.24434e+07	3.44201e+07	3.70868e+07	0	3.50231e+07	0	3.89107e+07	37585669		2.34933e+07	4.73518e+07	2.40367e+07	2.54988e+07		0.191588	0.492281	0.4719	0.081801	0.468777	0.100879
O88917	Latrophilin-1 OS=Rattus norvegicus GN=Lphn1 PE=1 SV=1 - [LPHN1_RAT]	0	0	3.50782e+07	55594088	1.03356e+07	5.76496e+07	6.35706e+07	0	6.50596e+07	3.82521e+07	4.13383e+07	2.63636e+07		1.16927e+07	4.11931e+07	4.28767e+07	3.5318e+07		0.101195	0.135378	0.066475	0.476126	0.373812	0.366833
P00406	Cytochrome c oxidase subunit 2 OS=Rattus norvegicus GN=Mtco2 PE=2 SV=2 - [COX2_RAT]	5.93181e+06	8.19505e+06	1.04298e+09	940825062	4.82538e+08	6.1769e+08	1.10012e+09	0	1.0993e+09	5.94836e+08	1.53736e+08	5.4787e+08		3.52368e+08	6.80351e+08	7.3314e+08	4.32147e+08		0.213363	0.245836	0.420455	0.449559	0.242881	0.136068
P00507	Aspartate aminotransferase, mitochondrial OS=Rattus norvegicus GN=Got2 PE=1 SV=2 - [AATM_RAT]	0	0	7.13934e+08	313358375	2.28331e+08	112370550	2.10978e+08	4.47982e+07	4.56001e+08	1.96519e+08	2.2796e+08	2.56789e+08		2.37978e+08	2.1802e+08	2.37259e+08	2.2709e+08		0.469495	0.498987	0.482895	0.44594	0.468449	0.444314
P01830	Thy-1 membrane glycoprotein OS=Rattus norvegicus GN=Thy1 PE=1 SV=1 - [THY1_RAT]	0	0	1.00339e+08	1.27438e+08	3.93493e+07	0	32235068	0	0	0	1.78687e+07	6.74499e+07		3.34464e+07	5.55958e+07	1.0745e+07	2.84395e+07		0.341448	0.276675	0.452095	0.158062	0.241044	0.27984
P01946	Hemoglobin subunit alpha-1/2 OS=Rattus norvegicus GN=Hba1 PE=1 SV=3 - [HBA_RAT]	9.88425e+07	1.22737e+08	1.59977e+09	701646750	4.72178e+08	9.24273e+08	823801541	2.2871e+07	1.05681e+09	7.30433e+08	8.37476e+08	7.01917e+08		6.07116e+08	6.99366e+08	634493056	7.56609e+08		0.433048	0.482515	0.389514	0.428828	0.359351	0.348641
P02091	Hemoglobin subunit beta-1 OS=Rattus norvegicus GN=Hbb PE=1 SV=3 - [HBB1_RAT]	4.6089e+07	1.8711e+07	63154108	7.92088e+08	66888638	4.51931e+08	570412774	9.07046e+07	7.01179e+08	6.37867e+08	5.79963e+08	4.78475e+08		4.26514e+07	4.36969e+08	4.54099e+08	5.65435e+08		0.066735	0.0457238	0.000207471	0.477065	0.295929	0.290834
P02688	Myelin basic protein S OS=Rattus norvegicus GN=Mbp PE=1 SV=3 - [MBP_RAT]	1.74076e+09	2.96165e+09	2.64328e+10	1.32881e+10	3.44984e+10	20852687356	2.2752e+10	2.15848e+09	3.00805e+10	1.94457e+10	1.62804e+10	29111923339		1.03784e+10	2.28797e+10	1.83303e+10	2.16127e+10		0.142822	0.265241	0.13803	0.342331	0.369723	0.43539
P04636	Malate dehydrogenase, mitochondrial OS=Rattus norvegicus GN=Mdh2 PE=1 SV=2 - [MDHM_RAT]	3.39296e+07	0	364019784	1.27813e+08	6.22397e+08	1.96808e+08	1.22217e+08	0	5.41708e+08	3.4136e+08	1.21469e+08	586511767		1.3265e+08	3.15672e+08	2.21308e+08	3.4978e+08		0.198757	0.340947	0.144223	0.348514	0.28862	0.437915
P04797	Glyceraldehyde-3-phosphate dehydrogenase OS=Rattus norvegicus GN=Gapdh PE=1 SV=3 - [G3P_RAT]	3.57545e+08	7.02726e+08	8.25979e+09	6843170071	6.21678e+09	5.5909e+09	8.09284e+09	4.19144e+08	8.80766e+09	3.7912e+09	5.9113e+09	4.96024e+09		3.10669e+09	6.21695e+09	5.77321e+09	4.88758e+09		0.149125	0.256698	0.269218	0.43892	0.38194	0.0675891
P04897	Guanine nucleotide-binding protein G(i) subunit alpha-2 OS=Rattus norvegicus GN=Gnai2 PE=1 SV=3 - [GNAI2_RAT]	0	0	1.32066e+08	4.85329e+07	47443731	20708093	3.11014e+07	4.64791e+07	7.57807e+07	7.97796e+07	57263063	1.32518e+07		4.40219e+07	3.88949e+07	5.11204e+07	5.00982e+07		0.457345	0.442331	0.452845	0.24311	0.483711	0.315308
P04904	Glutathione S-transferase alpha-3 OS=Rattus norvegicus GN=Gsta3 PE=1 SV=3 - [GSTA3_RAT]	0	0	1.82613e+08	1.08816e+08	1.116e+08	5.0855e+07	1.55571e+08	5.14453e+06	1.47795e+08	0	4.9561e+07	6.69859e+07		6.0871e+07	9.04236e+07	1.02837e+08	3.8849e+07		0.33415	0.309721	0.374225	0.412765	0.146336	0.0706519
P04905	Glutathione S-transferase Mu 1 OS=Rattus norvegicus GN=Gstm1 PE=1 SV=2 - [GSTM1_RAT]	0	0	2.3476e+07	2.24559e+07	0	0	2.77766e+07	0	2.60787e+07	0	5.51883e+06	1.09591e+07		7.82533e+06	7.48531e+06	1.79518e+07	5.49264e+06		0.488228	0.221688	0.39798	0.210749	0.130581	0.409181
P05065	Fructose-bisphosphate aldolase A OS=Rattus norvegicus GN=Aldoa PE=1 SV=2 - [ALDOA_RAT]	1.54531e+07	3.02367e+08	3.15521e+09	1.85531e+09	1.81756e+09	1.92496e+09	2.87389e+09	7.12326e+08	2327754937	2.51638e+09	2445916772	3.2252e+09		1.15768e+09	1865941510	1.97132e+09	2.72917e+09		0.259466	0.266491	0.101352	0.439505	0.168413	0.0131289
P05696	Protein kinase C alpha type OS=Rattus norvegicus GN=Prkca PE=1 SV=3 - [KPCA_RAT]	0	0	0	5.77096e+07	0	5.19502e+07	0	0	4.68491e+07	5.83508e+07	4.68188e+06	2.26674e+06		0	3.65533e+07	1.56164e+07	2.17665e+07		0.0586063	0.18695	0.150087	0.216976	0.405433	0.299441
P05708	Hexokinase-1 OS=Rattus norvegicus GN=Hk1 PE=1 SV=4 - [HXK1_RAT]	3.99109e+08	4.49152e+08	3.94719e+09	3.85328e+09	2.80903e+09	1.93892e+09	4.04245e+09	4.16057e+08	5.52847e+09	2.59141e+09	3.23672e+09	2.87041e+09		1.59848e+09	2.86708e+09	3.32899e+09	2.89951e+09		0.191917	0.209143	0.167703	0.394599	0.396414	0.479188
P06685	Sodium/potassium-transporting ATPase subunit alpha-1 OS=Rattus norvegicus GN=Atp1a1 PE=1 SV=1 - [AT1A1_RAT]	7.525e+07	3.62802e+08	4.46654e+09	4.02238e+09	3.04505e+09	4.02302e+09	4.45421e+09	9.35255e+08	3.86844e+09	1.78618e+09	3.00365e+09	2.72642e+09		1.63486e+09	3.69682e+09	3.08597e+09	2.50542e+09		0.114731	0.231267	0.292209	0.30969	0.320002	0.0362941
P06686	Sodium/potassium-transporting ATPase subunit alpha-2 OS=Rattus norvegicus GN=Atp1a2 PE=1 SV=1 - [AT1A2_RAT]	2.3492e+08	5.123e+08	3.91605e+09	3.21992e+09	3.12461e+09	3.21668e+09	4582612424	9.64724e+08	4.79202e+09	2.72665e+09	2.92239e+09	2.51802e+09		1.55442e+09	3.18707e+09	3.44645e+09	2.72235e+09		0.119993	0.166024	0.190837	0.422433	0.296418	0.00918983
P06687	Sodium/potassium-transporting ATPase subunit alpha-3 OS=Rattus norvegicus GN=Atp1a3 PE=1 SV=2 - [AT1A3_RAT]	8.26836e+08	6.5981e+08	6.53922e+09	3.80583e+09	5.88474e+09	5.87407e+09	6.46757e+09	4.94455e+09	8.13032e+09	3.09216e+09	5.67449e+09	7.19711e+09		2.67529e+09	5.18821e+09	6.51414e+09	5.32125e+09		1	0.0736694	0.15462	0.156688	0.236937	0.464
P06761	78 kDa glucose-regulated protein OS=Rattus norvegicus GN=Hspa5 PE=1 SV=1 - [GRP78_RAT]	0	0	2.88897e+08	3.37847e+08	2.91328e+08	8.44937e+07	1.07982e+08	1.0926e+08	2.27196e+08	9.10533e+07	87018896	2.04863e+08		9.62991e+07	2.37889e+08	1.48146e+08	1.27645e+08		0.15834	0.322288	0.388813	0.181081	0.364745	0.136732
P07323	Gamma-enolase OS=Rattus norvegicus GN=Eno2 PE=1 SV=2 - [ENOG_RAT]	4.02691e+06	2.16345e+07	4.03683e+08	3.2575e+08	4.50053e+08	4.98826e+08	4.28749e+08	0	1.01777e+08	3.40161e+08	2.74468e+08	3.82314e+08		1.43115e+08	4.24877e+08	1.76842e+08	3.32314e+08		0.0574132	0.431611	0.115562	0.0747028	0.153802	0.0998668
P07335	Creatine kinase B-type OS=Rattus norvegicus GN=Ckb PE=1 SV=2 - [KCRB_RAT]	4.55307e+08	8.89426e+06	6.41941e+09	4.90256e+09	6.07603e+09	4.70426e+09	4.56336e+09	5.15572e+08	4.75924e+09	3.46051e+09	5.04607e+09	3.32265e+09		2.29454e+09	5.22762e+09	3.27939e+09	3.94308e+09		0.118461	0.356138	0.241954	0.124815	0.339477	0.0700426
P07340	Sodium/potassium-transporting ATPase subunit beta-1 OS=Rattus norvegicus GN=Atp1b1 PE=1 SV=1 - [AT1B1_RAT]	0	3.17134e+07	3.11836e+09	1.27255e+09	5.18248e+08	8.30895e+08	2.33843e+09	4.32819e+08	3.60163e+09	7.43363e+08	1.03807e+09	7.42795e+08		1.05002e+09	8.73896e+08	2.1243e+09	8.41409e+08		0.437879	0.24061	0.425323	0.128519	0.119137	0.449408
P07633	Propionyl-CoA carboxylase beta chain, mitochondrial OS=Rattus norvegicus GN=Pccb PE=2 SV=1 - [PCCB_RAT]	1.09759e+07	0	5.26833e+07	5.16353e+07	7.0113e+07	8.28291e+07	33145855	1242615	68477417	33195883	6.91284e+07	44854015		2.12197e+07	6.81925e+07	34288629	4.90594e+07		0.03168	0.31564	0.110565	0.0943596	0.270373	0.120764
P07936	Neuromodulin OS=Rattus norvegicus GN=Gap43 PE=1 SV=1 - [NEUM_RAT]	0	2.37223e+07	5.02217e+07	0	7.08367e+07	113757615	0	0	1.56855e+08	1.36759e+08	9.64103e+07	8.71793e+07		2.4648e+07	6.15314e+07	5.2285e+07	1.06783e+08		0.182936	0.318661	0.00872529	0.444258	0.186786	0.141377
P08081	Clathrin light chain A OS=Rattus norvegicus GN=Clta PE=1 SV=1 - [CLCA_RAT]	0	5.81164e+07	323673723	1.02763e+08	3.79731e+08	3.64737e+08	5.26381e+08	84190250	4.31448e+08	354513603	1.20346e+08	5.23593e+08		1.27263e+08	2.82411e+08	3.47339e+08	3.32818e+08		0.156015	0.129343	0.125917	0.354284	0.469471	0.37487
P08082	Clathrin light chain B OS=Rattus norvegicus GN=Cltb PE=1 SV=1 - [CLCB_RAT]	5.16296e+06	3.89243e+07	6.54851e+08	5.49984e+08	6.41869e+08	6.08061e+08	7.02413e+08	1.1851e+08	6.34446e+08	6.91481e+08	4.19958e+08	5.46202e+08		2.32979e+08	5.99972e+08	4.85123e+08	5.52547e+08		0.0798898	0.209619	0.114498	0.285466	0.376693	0.298961
P08413	Calcium/calmodulin-dependent protein kinase type II subunit beta OS=Rattus norvegicus GN=Camk2b PE=1 SV=1 - [KCC2B_RAT]	1.13218e+07	0	9.72275e+07	1.24293e+08	1.32076e+08	9.60873e+07	0	0	1.83701e+08	0	1.19421e+08	6.21531e+07		3.61831e+07	1.17486e+08	6.12337e+07	6.05247e+07		0.03356	0.366548	0.312954	0.208478	0.496217	0.0952337
P08461	Dihydrolipoyllysine-residue acetyltransferase component of pyruvate dehydrogenase complex, mitochondrial OS=Rattus norvegicus GN=Dlat PE=1 SV=3 - [ODP2_RAT]	1.12085e+08	5.63154e+08	4509860479	3.4961e+09	3.29391e+09	3.24744e+09	3.68798e+09	1.38259e+08	5.07248e+09	2.08575e+09	2.80299e+09	1.78713e+09		1.72837e+09	3.34582e+09	2.96624e+09	2.22529e+09		0.155973	0.287234	0.372779	0.404577	0.323612	0.0113435
P09117	Fructose-bisphosphate aldolase C OS=Rattus norvegicus GN=Aldoc PE=1 SV=3 - [ALDOC_RAT]	4.1476e+07	6.2608e+07	1.30591e+09	1.07157e+09	1.42646e+09	4.0465e+08	9.16698e+08	68403247	502373933	8.97323e+08	8.48645e+08	4.98626e+08		4.69998e+08	9.67562e+08	4.95825e+08	7.48198e+08		1	0.48002	0.279259	0.14486	0.205519	0.26822
P09606	Glutamine synthetase OS=Rattus norvegicus GN=Glul PE=1 SV=3 - [GLNA_RAT]	1.39206e+08	1.30773e+08	3.03139e+09	2.34059e+09	3.82219e+09	2.6906e+09	1.94338e+09	1.76087e+09	2.65368e+09	2.11042e+09	1.452e+09	3.44846e+09		1.10046e+09	2.95113e+09	2119308479	2.33696e+09		0.0784741	0.183616	0.167678	0.0936377	0.376814	0.226091
P09951	Synapsin-1 OS=Rattus norvegicus GN=Syn1 PE=1 SV=3 - [SYN1_RAT]	6.50692e+07	1.16137e+08	1.56137e+09	8.71409e+08	1.08007e+09	9.30897e+08	1.11466e+09	3.08044e+08	1.40053e+09	7.12395e+08	1.44202e+09	6.63846e+08		5.8086e+08	9.60791e+08	9.41077e+08	9.3942e+08		0.242529	0.287105	0.275449	0.477811	0.498494	0.469128
P0C1X8	AP2-associated protein kinase 1 OS=Rattus norvegicus GN=Aak1 PE=1 SV=1 - [AAK1_RAT]	0	0	2.93302e+08	1.08098e+08	2.59105e+08	1.73747e+08	139476884	3.67982e+07	158306851	8.40742e+07	7.59703e+07	1.00624e+08		9.77673e+07	1.80317e+08	1.11527e+08	8.68896e+07		0.241914	0.450942	0.458498	0.149771	0.278261	0.0513418
P0C2X9	Delta-1-pyrroline-5-carboxylate dehydrogenase, mitochondrial OS=Rattus norvegicus GN=Aldh4a1 PE=1 SV=1 - [AL4A1_RAT]	0	2.70838e+07	0	6.78021e+07	1.39147e+08	8.75859e+07	1.57388e+08	0	8.17736e+07	1.57175e+08	1.87762e+08	0		9.02794e+06	9.81782e+07	7.97204e+07	1.14979e+08		0.00908204	0.100887	0.0731151	0.365805	0.328906	0.399797
P10111	Peptidyl-prolyl cis-trans isomerase A OS=Rattus norvegicus GN=Ppia PE=1 SV=2 - [PPIA_RAT]	3.22038e+08	6.6834e+06	1.72852e+09	8.49469e+08	9.30449e+08	8.06605e+08	9.08695e+08	2.53701e+08	6.80039e+08	8.57914e+08	8.37457e+08	9.26397e+08		6.85746e+08	8.62175e+08	6.14145e+08	873922575		0.378083	0.452468	0.370231	0.136505	0.12559	0.403851
P10687	1-phosphatidylinositol-4,5-bisphosphate phosphodiesterase beta-1 OS=Rattus norvegicus GN=Plcb1 PE=1 SV=1 - [PLCB1_RAT]	0	0	6.08781e+07	6.20985e+07	3.91459e+07	3.18559e+07	5.65495e+07	1.62971e+07	4.8842e+07	3.25675e+07	12109374	0		2.02927e+07	4.43668e+07	4.05629e+07	1.48923e+07		0.170014	0.220724	0.410701	0.408158	0.0872944	0.0443796
P10719	ATP synthase subunit beta, mitochondrial OS=Rattus norvegicus GN=Atp5b PE=1 SV=2 - [ATPB_RAT]	2.0094e+09	7.31715e+08	9.20057e+09	5.27724e+09	2.55608e+10	2.06573e+10	4.45045e+09	1.27623e+09	6715675324	4.27008e+09	5.06748e+09	4.54614e+09		3.98056e+09	1.71651e+10	4.14745e+09	4627904250		0.0593124	0.47964	0.409392	0.0540512	0.38911	0.0548226
P10860	Glutamate dehydrogenase 1, mitochondrial OS=Rattus norvegicus GN=Glud1 PE=1 SV=2 - [DHE3_RAT]	3.20806e+07	4091916	1.46243e+08	112410196	1.21458e+08	1.18635e+08	212213446	53783930	1.66301e+08	1.44475e+08	1.04932e+08	1.56739e+08		6.0805e+07	1.17501e+08	1.441e+08	1.35382e+08		0.131475	0.13172	0.0908931	0.301357	0.434498	0.161285
P10888	Cytochrome c oxidase subunit 4 isoform 1, mitochondrial OS=Rattus norvegicus GN=Cox4i1 PE=1 SV=1 - [COX41_RAT]	1.73103e+08	1.57612e+08	1.45131e+09	1.12479e+09	399155454	1.15557e+09	1.62205e+09	3.75961e+07	1.89206e+09	7.62188e+08	9.55211e+08	3.48131e+08		5.9401e+08	8.93172e+08	1.1839e+09	6.8851e+08		0.289038	0.229301	0.424371	0.333983	0.229608	0.269622
P11240	Cytochrome c oxidase subunit 5A, mitochondrial OS=Rattus norvegicus GN=Cox5a PE=1 SV=1 - [COX5A_RAT]	1.86663e+07	2.36602e+08	3141879633	9.54989e+08	2.09804e+09	1.0421e+09	1.84812e+09	1.3163e+08	1.5504e+09	1.15621e+09	440009790	1.57475e+09		1.13238e+09	1.36504e+09	1.17672e+09	1.05699e+09		0.419375	0.485389	0.473352	0.39233	0.42867	0.283605
P11275	Calcium/calmodulin-dependent protein kinase type II subunit alpha OS=Rattus norvegicus GN=Camk2a PE=1 SV=1 - [KCC2A_RAT]	2.98521e+07	1.75961e+07	749118348	3.01069e+08	2.45463e+08	2.65219e+08	6.01699e+08	2.30393e+07	5.8469e+08	1.85001e+08	3.20408e+08	1.34667e+08		2.65522e+08	2.70584e+08	4.03143e+08	2.13358e+08		0.492169	0.338876	0.421873	0.262738	0.196086	0.189095
P11442	Clathrin heavy chain 1 OS=Rattus norvegicus GN=Cltc PE=1 SV=3 - [CLH_RAT]	5.11706e+08	1.53688e+08	6.81507e+09	4.44593e+09	3.48642e+09	3.08337e+09	4.95942e+09	1.15013e+09	5.92468e+09	3.36862e+09	4.28327e+09	3.82318e+09		2.49349e+09	3.67191e+09	4.01141e+09	3.82502e+09		0.310353	0.29592	0.287111	0.416699	0.452969	0.383486
P11505	Plasma membrane calcium-transporting ATPase 1 OS=Rattus norvegicus GN=Atp2b1 PE=2 SV=2 - [AT2B1_RAT]	0	5.83667e+07	549331170	246015010	326662396	4.74408e+08	7.24225e+08	2.83271e+08	4.02451e+08	3.89601e+08	278281648	5.15349e+08		2.02566e+08	3.49028e+08	4.69982e+08	3.9441e+08		0.23819	0.143964	0.181662	0.22941	0.318731	0.330061
P11506	Plasma membrane calcium-transporting ATPase 2 OS=Rattus norvegicus GN=Atp2b2 PE=2 SV=2 - [AT2B2_RAT]	1.21334e+08	6.16396e+07	1.27264e+09	9.81351e+08	8.34432e+08	6.93797e+08	8.41045e+08	2.00466e+08	1.63592e+09	4.47721e+08	8.082e+08	5.59527e+08		4.85205e+08	8.36526e+08	8.92478e+08	6.0515e+08		0.216134	0.258042	0.39176	0.450623	0.269676	0.0809207
P11507	Sarcoplasmic/endoplasmic reticulum calcium ATPase 2 OS=Rattus norvegicus GN=Atp2a2 PE=1 SV=1 - [AT2A2_RAT]	0	0	4.64579e+08	4.24656e+08	5.08145e+08	4.15027e+08	7.08262e+08	2.4668e+08	7.91226e+08	2.41045e+08	429713730	4.16149e+08		1.5486e+08	4.49276e+08	5.82056e+08	3.62303e+08		0.0676147	0.0680938	0.140211	0.241543	0.144541	0.133726
P11598	Protein disulfide-isomerase A3 OS=Rattus norvegicus GN=Pdia3 PE=1 SV=2 - [PDIA3_RAT]	0	2.95813e+06	7.23779e+07	4.62342e+07	6.68076e+07	3.0961e+07	2.30994e+07	0	7.0643e+07	24351481	3.61754e+07	3.18204e+07		2.5112e+07	4.80009e+07	3.12475e+07	3.07824e+07		0.21279	0.427511	0.412054	0.255473	0.491728	0.0953838
P11884	Aldehyde dehydrogenase, mitochondrial OS=Rattus norvegicus GN=Aldh2 PE=1 SV=1 - [ALDH2_RAT]	0	0	3.80071e+08	3.02177e+08	7.29433e+07	210629815	241829792	5.84302e+07	2.66455e+08	2.48166e+08	2.66337e+08	2.48104e+08		1.2669e+08	1.9525e+08	1.88905e+08	2.54202e+08		0.328482	0.34265	0.185808	0.47458	0.188934	0.213972
P11951	Cytochrome c oxidase subunit 6C-2 OS=Rattus norvegicus GN=Cox6c2 PE=1 SV=3 - [CX6C2_RAT]	0	0	57152419	6.69054e+07	1.98172e+07	0	98149891	0	1.11048e+08	2.32624e+07	5.7257e+07	2.29068e+07		1.90508e+07	2.89075e+07	6.97327e+07	3.44754e+07		0.369101	0.136461	0.262684	0.184113	0.196538	0.409848
P11960	2-oxoisovalerate dehydrogenase subunit alpha, mitochondrial (Fragment) OS=Rattus norvegicus GN=Bckdha PE=1 SV=1 - [ODBA_RAT]	0	0	1.23429e+08	0	5.77845e+07	0	3.8078e+07	0	2.94779e+07	7.40349e+07	8.58749e+07	78192419		4.1143e+07	1.92615e+07	22518626	7.93674e+07		0.327604	0.342707	0.203479	0.445828	0.00458023	0.0186258
P11980	Pyruvate kinase isozymes M1/M2 OS=Rattus norvegicus GN=Pkm2 PE=1 SV=3 - [KPYM_RAT]	9.91043e+07	1.05218e+08	2.10556e+09	1.72636e+09	1.37385e+09	1.53468e+09	2.60967e+09	1.5941e+08	2.33977e+09	7.03038e+08	1.47203e+09	2.14126e+09		7.69959e+08	1.54496e+09	1.70295e+09	1.43878e+09		0.157616	0.206792	0.221517	0.424911	0.389487	0.408098
P12369	cAMP-dependent protein kinase type II-beta regulatory subunit OS=Rattus norvegicus GN=Prkar2b PE=1 SV=3 - [KAP3_RAT]	0	0	2.49273e+08	1.97055e+08	1.00303e+08	9.05043e+07	2.096e+08	4.08941e+07	1.21768e+08	1.0978e+08	1.99574e+08	2.3249e+08		8.30911e+07	1.29287e+08	1.24087e+08	1.80615e+08		0.316994	0.346139	0.171691	0.467228	0.20318	0.181361
P12785	Fatty acid synthase OS=Rattus norvegicus GN=Fasn PE=1 SV=3 - [FAS_RAT]	0	0	1.16113e+08	5.31581e+07	0	6.07326e+07	50080347	0	0	7.46058e+07	2.25792e+07	3.95518e+07		3.87044e+07	3.79636e+07	16693449	4.55789e+07		0.493564	0.31456	0.438417	0.224513	0.135677	0.385679
P13086	Succinyl-CoA ligase [GDP-forming] subunit alpha, mitochondrial OS=Rattus norvegicus GN=Suclg1 PE=2 SV=2 - [SUCA_RAT]	3.17142e+08	1.07258e+08	3.17547e+09	2.09665e+09	2.14364e+09	1.59083e+09	1.45411e+09	1.53987e+08	1.88535e+09	8.73154e+08	1.2073e+09	2.18097e+09		1.19996e+09	1.94371e+09	1.16448e+09	1.42047e+09		0.250237	0.488105	0.423005	0.11462	0.357241	0.14545
P13233	2',3'-cyclic-nucleotide 3'-phosphodiesterase OS=Rattus norvegicus GN=Cnp PE=1 SV=2 - [CN37_RAT]	7.14467e+07	1.02148e+08	2.83049e+09	2.14453e+09	1.46038e+09	1.63525e+09	2.30266e+09	5.82276e+08	2.41547e+09	1.34127e+09	1.36144e+09	1.36058e+09		1.00136e+09	1.74672e+09	1.7668e+09	1.35443e+09		0.235513	0.260641	0.359566	0.488004	0.262609	0.0643235
P13264	Glutaminase kidney isoform, mitochondrial OS=Rattus norvegicus GN=Gls PE=1 SV=2 - [GLSK_RAT]	0	7.01087e+06	1.52114e+08	1.41915e+08	1.45045e+08	1.16617e+08	1.81796e+08	1.04261e+08	2.49009e+08	9.36966e+07	1.64003e+08	4.42852e+07		5.30415e+07	1.34526e+08	1.78356e+08	1.00661e+08		0.0905769	0.0627589	0.237735	0.181736	0.113085	0.199359
P13437	3-ketoacyl-CoA thiolase, mitochondrial OS=Rattus norvegicus GN=Acaa2 PE=1 SV=1 - [THIM_RAT]	0	7.94727e+06	305613375	1.48202e+08	2.67177e+08	1.00388e+08	9.08594e+07	1.48225e+07	2.3582e+08	1.06811e+08	2.14238e+08	1.65479e+08		1.0452e+08	1.71923e+08	1.13834e+08	1.62176e+08		0.29009	0.470846	0.306495	0.257965	0.269041	0.437891
P13596	Neural cell adhesion molecule 1 OS=Rattus norvegicus GN=Ncam1 PE=1 SV=1 - [NCAM1_RAT]	0	7.81134e+06	2.10832e+08	8.87482e+07	6.3345e+07	1.17684e+07	1.63825e+08	3.77574e+07	164257440	1.30928e+08	1.04798e+08	8.35451e+07		7.28811e+07	5.46205e+07	1.21947e+08	106423834		0.406943	0.288319	0.329214	0.11588	0.371769	0.0609779
P13638	Sodium/potassium-transporting ATPase subunit beta-2 OS=Rattus norvegicus GN=Atp1b2 PE=2 SV=1 - [AT1B2_RAT]	2.33467e+08	3.44932e+07	422212649	450679303	339401756	435097277	4.58238e+08	18522574	9.71535e+08	2.68146e+08	4.78414e+08	846272861		2.30058e+08	4.08393e+08	4.82765e+08	5.30944e+08		0.101406	0.221578	0.105902	0.400998	0.444335	0.258316
P13803	Electron transfer flavoprotein subunit alpha, mitochondrial OS=Rattus norvegicus GN=Etfa PE=1 SV=4 - [ETFA_RAT]	0	0	2.51065e+08	2.70255e+08	2.84374e+08	1.33301e+08	1.74258e+08	0	1.44937e+08	2.77389e+08	2.9471e+08	1.77314e+08		8.36883e+07	2.2931e+08	1.06398e+08	2.49804e+08		0.10302	0.415348	0.0715453	0.082106	0.0462126	0.375907
P14408	Fumarate hydratase, mitochondrial OS=Rattus norvegicus GN=Fh PE=1 SV=1 - [FUMH_RAT]	6.08541e+06	6.95256e+07	1.24007e+09	1.0135e+09	1.03363e+09	7.74677e+08	1.05121e+09	4.43688e+08	1.05957e+09	5.47101e+08	1.19589e+09	1.22774e+09		4.3856e+08	9.406e+08	8.51489e+08	9.90245e+08		0.143825	0.205381	0.147562	0.353222	0.334514	0.422108
P14604	Enoyl-CoA hydratase, mitochondrial OS=Rattus norvegicus GN=Echs1 PE=1 SV=1 - [ECHM_RAT]	1.65344e+07	0	311492689	1.77981e+08	1.08224e+07	6.9964e+07	1.7386e+08	1.79439e+07	1.25602e+08	1.78146e+08	1.19137e+08	1.91611e+08		1.09342e+08	8.62559e+07	1.05802e+08	1.62965e+08		0.423647	0.488063	0.316036	0.392838	0.16329	0.113392
P14882	Propionyl-CoA carboxylase alpha chain, mitochondrial OS=Rattus norvegicus GN=Pcca PE=1 SV=3 - [PCCA_RAT]	0	1.36626e+07	1.75594e+08	1.3758e+08	2.48973e+08	1.0188e+08	4.64301e+07	98045222	1.89266e+08	7.29617e+07	50949556	2.76583e+07		6.30856e+07	1.62811e+08	1.11247e+08	5.05232e+07		0.118347	0.265104	0.419411	0.222342	0.118765	0.0359461
P15205	Microtubule-associated protein 1B OS=Rattus norvegicus GN=Map1b PE=1 SV=2 - [MAP1B_RAT]	0	0	2.96257e+07	4.31621e+07	2.04144e+07	4.1404e+07	32991768	116443331	1.54551e+07	19167863	2.06894e+07	1.41945e+07		9.87522e+06	3.49935e+07	5.49634e+07	1.80173e+07		0.0551781	0.119905	0.232021	0.283205	0.151057	0.0441241
P15650	Long-chain specific acyl-CoA dehydrogenase, mitochondrial OS=Rattus norvegicus GN=Acadl PE=1 SV=1 - [ACADL_RAT]	0	0	1.93365e+08	9.55866e+07	0	5.00667e+07	1.42238e+08	0	7.20654e+07	53509561	1.15253e+08	62236097		6.4455e+07	4.85511e+07	7.14344e+07	7.69995e+07		0.415843	0.465812	0.430582	0.333882	0.454144	0.222911
P15791	Calcium/calmodulin-dependent protein kinase type II subunit delta OS=Rattus norvegicus GN=Camk2d PE=1 SV=1 - [KCC2D_RAT]	0	0	50155561	4.79531e+07	4.62029e+07	0	0	0	2.85831e+07	28114774	59803716	4.0814e+07		1.67185e+07	3.13854e+07	9.5277e+06	4.29108e+07		0.278646	0.3638	0.120946	0.149898	0.0326954	0.280495
P15999	ATP synthase subunit alpha, mitochondrial OS=Rattus norvegicus GN=Atp5a1 PE=1 SV=2 - [ATPA_RAT]	5.80778e+09	1.99422e+09	2.85558e+10	2.15236e+10	3.36928e+10	2.07941e+10	2.46464e+10	5.11877e+09	3.14665e+10	1.45951e+10	1.35236e+10	1.55985e+10		1.21193e+10	2.53368e+10	2.04105e+10	1.45724e+10		0.113883	0.254525	0.391307	0.305373	0.250918	0.0317458
P16036	Phosphate carrier protein, mitochondrial OS=Rattus norvegicus GN=Slc25a3 PE=1 SV=1 - [MPCP_RAT]	0	1.93568e+08	2.88572e+08	1486890346	6.73019e+08	1.12548e+09	1.39507e+09	5.98315e+06	1.71354e+09	7.31023e+08	1.24927e+09	8.90555e+08		1.60713e+08	1.09513e+09	1.0382e+09	9.56949e+08		0.0101173	0.086907	0.00522909	0.462925	0.444471	0.324283
P16086	Spectrin alpha chain, brain OS=Rattus norvegicus GN=Sptan1 PE=1 SV=2 - [SPTA2_RAT]	4.95446e+07	2.30127e+07	1.75193e+09	1.04806e+09	1.01841e+09	851670613	1.39684e+09	4.989e+08	1.34929e+09	9.11672e+08	9.78428e+08	2.03057e+09		6.08162e+08	9.72714e+08	1.08168e+09	1.30689e+09		0.280324	0.250864	0.18019	0.366594	0.326799	0.207292
P16617	Phosphoglycerate kinase 1 OS=Rattus norvegicus GN=Pgk1 PE=1 SV=2 - [PGK1_RAT]	0	6.20076e+06	1.85497e+08	1.73973e+08	141999468	1.1165e+08	1.89119e+08	2.22534e+07	2.25126e+08	1.57845e+07	1.64879e+08	1.12083e+08		6.38994e+07	1.42541e+08	1.455e+08	9.75821e+07		0.141407	0.201201	0.338039	0.482947	0.281854	0.197431
P17764	Acetyl-CoA acetyltransferase, mitochondrial OS=Rattus norvegicus GN=Acat1 PE=1 SV=1 - [THIL_RAT]	4.54491e+08	1.72303e+08	5.11353e+09	4.3629e+09	4799588949	4.18381e+09	3.45823e+09	1.15221e+09	4.02962e+09	1.43774e+09	3.97587e+09	3.92091e+09		1.91344e+09	4.44877e+09	2880017855	3.11151e+09		0.0954944	0.312443	0.271851	0.0778429	0.429038	0.0967958
P18484	AP-2 complex subunit alpha-2 OS=Rattus norvegicus GN=Ap2a2 PE=1 SV=3 - [AP2A2_RAT]	0	1.26133e+07	5.61399e+08	3.65606e+08	2.2057e+08	3.03057e+08	1.8085e+08	1.1123e+08	380736595	5.18404e+07	2.61926e+08	1.32002e+08		1.91337e+08	2.96411e+08	2.24272e+08	1.48589e+08		0.304644	0.439173	0.418575	0.236239	0.24835	0.05864
P19234	NADH dehydrogenase [ubiquinone] flavoprotein 2, mitochondrial OS=Rattus norvegicus GN=Ndufv2 PE=1 SV=2 - [NDUV2_RAT]	0	1.35146e+07	1.66583e+08	153375303	0	9.90262e+07	1.65174e+08	0	2.54373e+08	91377411	104506804	5.86272e+07		6.00325e+07	8.41338e+07	1.39849e+08	8.48371e+07		0.3736	0.216561	0.33804	0.278367	0.253966	0.49438
P19332	Microtubule-associated protein tau OS=Rattus norvegicus GN=Mapt PE=1 SV=3 - [TAU_RAT]	1.19814e+08	7.00681e+07	2.39612e+09	1.28609e+09	1.09096e+09	7.67834e+08	7.50181e+08	1.07496e+08	9.39719e+08	7.46486e+08	8.92398e+08	1.15594e+09		8.62002e+08	1.04829e+09	5.99132e+08	9.31606e+08		0.411699	0.380542	0.466441	0.100458	0.149543	0.288894
P19511	ATP synthase subunit b, mitochondrial OS=Rattus norvegicus GN=Atp5f1 PE=1 SV=1 - [AT5F1_RAT]	9.28776e+07	7.09254e+07	7.11866e+08	5.29136e+08	2.18706e+08	4.57767e+08	7.84799e+08	1.72589e+08	6.52671e+08	4.30438e+08	245189301	4.71744e+08		2.9189e+08	4.01869e+08	5.36686e+08	3.82457e+08		0.328812	0.216107	0.35168	0.27642	0.240403	0.43808
P20069	Mitochondrial-processing peptidase subunit alpha OS=Rattus norvegicus GN=Pmpca PE=1 SV=1 - [MPPA_RAT]	0	0	0	8.6912e+07	5.00385e+07	5.27906e+07	6.7969e+07	0	2.54583e+07	6.08658e+07	6.04911e+07	7.07518e+07		0	6.3247e+07	3.11424e+07	6.40362e+07		0.00297623	0.0956599	2.23148e-05	0.118485	0.088608	0.476009
P20651	Serine/threonine-protein phosphatase 2B catalytic subunit beta isoform OS=Rattus norvegicus GN=Ppp3cb PE=2 SV=1 - [PP2BB_RAT]	0	1.29197e+06	7.77983e+07	6.29875e+07	2.60188e+07	1.71908e+07	4.82621e+07	0	4.80883e+07	18621499	0	2.84799e+07		2.63634e+07	3.5399e+07	3.21168e+07	1.57005e+07		0.38658	0.429374	0.356734	0.442559	0.207854	0.147022
P20788	Cytochrome b-c1 complex subunit Rieske, mitochondrial OS=Rattus norvegicus GN=Uqcrfs1 PE=1 SV=2 - [UCRI_RAT]	0	3.43498e+07	351440253	4.91471e+08	1.03405e+09	7.48587e+08	4.57829e+08	8.53759e+07	645444123	2.55131e+08	5.65666e+08	244325549		1.28597e+08	7.58035e+08	3.96216e+08	3.55041e+08		0.0154048	0.124939	0.107296	0.0932837	0.421709	0.0498673
P21396	Amine oxidase [flavin-containing] A OS=Rattus norvegicus GN=Maoa PE=1 SV=1 - [AOFA_RAT]	2.81925e+06	0	1.79539e+08	49854219	1.17889e+08	147107615	1.81015e+08	4.64178e+07	2.05919e+08	2.9718e+07	1.46488e+08	0		6.07862e+07	1.0495e+08	1.4445e+08	5.87353e+07		0.270025	0.170089	0.489655	0.264282	0.134157	0.216958
P21571	ATP synthase-coupling factor 6, mitochondrial OS=Rattus norvegicus GN=Atp5j PE=1 SV=1 - [ATP5J_RAT]	0	911278	2.19664e+09	2.22788e+09	2.46631e+09	2078694842	1.78598e+09	6.94787e+07	2.08599e+09	1706000608	1.78178e+09	1.66741e+09		7.32517e+08	2.25763e+09	1.31382e+09	1.7184e+09		0.0542892	0.28963	0.124866	0.10664	0.277573	0.005097
P21575	Dynamin-1 OS=Rattus norvegicus GN=Dnm1 PE=1 SV=2 - [DYN1_RAT]	4.03594e+07	7.94757e+07	1.1188e+09	1.50446e+09	1.17984e+09	7.95428e+08	2.19943e+09	1.25032e+08	1.46305e+09	8.04378e+08	1.59768e+09	1.21954e+09		4.12879e+08	1.15991e+09	1.2625e+09	1.2072e+09		0.0706427	0.146513	0.0661029	0.440281	0.46809	0.442588
P21707	Synaptotagmin-1 OS=Rattus norvegicus GN=Syt1 PE=1 SV=3 - [SYT1_RAT]	0	0	250012325	2.53564e+08	4.11629e+07	118133787	3.6277e+08	3.89429e+08	1.95562e+08	1.2025e+08	2.15546e+08	2.60978e+08		8.33374e+07	1.3762e+08	3.15921e+08	1.98925e+08		0.314511	0.0435183	0.141082	0.0545955	0.0932903	0.228846
P21775	3-ketoacyl-CoA thiolase A, peroxisomal OS=Rattus norvegicus GN=Acaa1a PE=2 SV=2 - [THIKA_RAT]	0	0	3.86714e+07	1.5724e+07	5.99039e+07	39069748	0	0	1.58791e+07	4.22795e+07	4.73337e+07	2.96069e+07		1.28905e+07	3.82325e+07	5.29302e+06	3.97401e+07		0.117443	0.307292	0.0630621	0.037814	0.00497479	0.459157
P21913	Succinate dehydrogenase [ubiquinone] iron-sulfur subunit, mitochondrial OS=Rattus norvegicus GN=Sdhb PE=2 SV=2 - [DHSB_RAT]	1.78182e+07	0	3.93926e+08	1.01266e+08	1.17823e+08	1.35249e+08	3.35686e+08	1.97369e+06	1.05469e+08	1.01128e+08	193147246	2.18186e+08		1.37248e+08	1.18113e+08	1.47709e+08	1.70821e+08		0.444549	0.475796	0.406769	0.390049	0.418166	0.113267
P24942	Excitatory amino acid transporter 1 OS=Rattus norvegicus GN=Slc1a3 PE=1 SV=2 - [EAA1_RAT]	5.1016e+07	89779477	2.99566e+08	5.32436e+08	1.9519e+08	578920970	4.15023e+08	4.72237e+07	2.97963e+08	4.29734e+08	3.26529e+08	4.48743e+08		1.46787e+08	4.35516e+08	2.53403e+08	4.01668e+08		0.0572258	0.234083	0.0207257	0.162506	0.133297	0.401306
P25286	V-type proton ATPase 116 kDa subunit a isoform 1 OS=Rattus norvegicus GN=Atp6v0a1 PE=2 SV=1 - [VPP1_RAT]	2.6259e+07	3.34143e+07	4.54869e+08	4.02161e+08	4.04549e+08	7.01682e+08	5.09238e+08	0	3.92162e+08	2.55114e+08	4.11526e+08	3.13391e+08		1.71514e+08	5.02797e+08	3.00467e+08	3.26677e+08		0.0640957	0.28554	0.178055	0.165811	0.439139	0.0913833
P25809	Creatine kinase U-type, mitochondrial OS=Rattus norvegicus GN=Ckmt1 PE=1 SV=1 - [KCRU_RAT]	1.32776e+08	6.05829e+07	2.78869e+09	1.61404e+09	2.12095e+09	1.09333e+09	1.66709e+09	3.21627e+08	2.42212e+09	1.57136e+09	1.67657e+09	1.52734e+09		9.94018e+08	1.60944e+09	1.47028e+09	1.59176e+09		0.275273	0.342041	0.271176	0.424157	0.426629	0.477906
P26284	Pyruvate dehydrogenase E1 component subunit alpha, somatic form, mitochondrial OS=Rattus norvegicus GN=Pdha1 PE=1 SV=2 - [ODPA_RAT]	1.3872e+08	1.4388e+08	6.54115e+08	1.41457e+09	4.60094e+08	1.08414e+09	7.16674e+08	1.16159e+08	1156498671	7.96683e+08	9.35711e+08	6.15207e+08		3.12238e+08	9.86268e+08	6.63111e+08	7.82534e+08		0.0545082	0.184321	0.0364642	0.238021	0.362125	0.26378
P26772	10 kDa heat shock protein, mitochondrial OS=Rattus norvegicus GN=Hspe1 PE=1 SV=3 - [CH10_RAT]	0	0	1.00972e+08	7.79562e+07	1.00654e+08	6.54108e+07	1.15051e+08	0	2.66383e+07	7.15715e+07	3.26565e+07	3.71498e+07		3.36574e+07	8.13403e+07	4.72296e+07	4.71259e+07		0.12351	0.396516	0.363044	0.200106	0.498945	0.0499705
P28480	T-complex protein 1 subunit alpha OS=Rattus norvegicus GN=Tcp1 PE=1 SV=1 - [TCPA_RAT]	0	0	9.88364e+07	7.08574e+07	51848959	0	47498357	0	1.14789e+08	0	20833253	25350725		3.29455e+07	4.09021e+07	5.40957e+07	1.53947e+07		0.424461	0.337511	0.315778	0.377461	0.160542	0.160774
P29147	D-beta-hydroxybutyrate dehydrogenase, mitochondrial OS=Rattus norvegicus GN=Bdh1 PE=1 SV=2 - [BDH_RAT]	0	0	1.78807e+08	1.19782e+08	3.31993e+07	1.55198e+08	1.54576e+08	2.20563e+08	2.17951e+08	34838054	1.14959e+08	8.43608e+07		5.96022e+07	1.02726e+08	1.97697e+08	7.80528e+07		0.28494	0.0474455	0.39374	0.0437258	0.00985225	0.298835
P29266	3-hydroxyisobutyrate dehydrogenase, mitochondrial OS=Rattus norvegicus GN=Hibadh PE=1 SV=3 - [3HIDH_RAT]	8.30856e+07	0	2.04881e+08	1.39889e+08	1.02339e+08	85822795	124118162	0	2.15085e+08	1.3014e+08	6.1131e+07	23442797		9.5989e+07	1.0935e+08	1.13068e+08	7.15713e+07		0.419459	0.426278	0.36736	0.478353	0.291892	0.17117
P29419	ATP synthase subunit e, mitochondrial OS=Rattus norvegicus GN=Atp5i PE=1 SV=3 - [ATP5I_RAT]	921688	0	5.87223e+07	4.77086e+07	9.89703e+07	0	8.87835e+07	1.96321e+08	1.3613e+08	7.92095e+07	1.40213e+08	2.56016e+08		1.98813e+07	4.8893e+07	1.40412e+08	1.58479e+08		0.224179	0.0151661	0.0332698	0.0481077	0.389993	0.0689142
P29994	Inositol 1,4,5-trisphosphate receptor type 1 OS=Rattus norvegicus GN=Itpr1 PE=1 SV=2 - [ITPR1_RAT]	0	0	2.79929e+08	3.67662e+08	3.30714e+08	2.3433e+08	158299800	6.26413e+07	3.13096e+08	7.98147e+07	1.57499e+08	54356386		9.33098e+07	3.10902e+08	1.78012e+08	9.72234e+07		0.0492427	0.257041	0.48508	0.0924961	0.182928	0.00664117
P30009	Myristoylated alanine-rich C-kinase substrate OS=Rattus norvegicus GN=Marcks PE=1 SV=2 - [MARCS_RAT]	0	5.81929e+06	5.0052e+07	47669604	1.58775e+08	30943330	1.76134e+08	0	1.68985e+08	117980847	5.17227e+07	1.46706e+08		1.86238e+07	7.91294e+07	1.1504e+08	1.0547e+08		0.116589	0.0907683	0.0272704	0.317858	0.44424	0.309666
P30904	Macrophage migration inhibitory factor OS=Rattus norvegicus GN=Mif PE=1 SV=4 - [MIF_RAT]	1.18121e+08	0	1496315641	5.79467e+08	18744606	5.11159e+07	9.12847e+08	4.44292e+07	473791803	5.36132e+08	3.35828e+08	7.81747e+08		5.38145e+08	2.16443e+08	4.77023e+08	5.51236e+08		0.282498	0.457806	0.490131	0.223709	0.402683	0.103713
P31399	ATP synthase subunit d, mitochondrial OS=Rattus norvegicus GN=Atp5h PE=1 SV=3 - [ATP5H_RAT]	1.8932e+08	5.01178e+07	6232751502	2.03577e+09	1.70596e+09	2.86658e+09	2.74861e+09	1.78654e+08	2.91792e+09	1.84175e+09	3.36178e+09	1.8266e+09		2.1574e+09	2.20277e+09	1.94839e+09	2.34338e+09		0.49177	0.464799	0.466855	0.401174	0.359422	0.415216
P31596	Excitatory amino acid transporter 2 OS=Rattus norvegicus GN=Slc1a2 PE=1 SV=2 - [EAA2_RAT]	7.46324e+08	2.21092e+08	3.06204e+09	2.10366e+09	3.21266e+09	1.62805e+09	2.4416e+09	4.41072e+08	3.00778e+09	2.11895e+09	1.86885e+09	3.51309e+09		1.34315e+09	2.31479e+09	1.96348e+09	2.5003e+09		0.19118	0.311952	0.158234	0.359432	0.297658	0.401268
P31647	Sodium- and chloride-dependent GABA transporter 3 OS=Rattus norvegicus GN=Slc6a11 PE=2 SV=1 - [S6A11_RAT]	3.16014e+06	1.17237e+08	7.98439e+08	7.44822e+08	5.49159e+08	5.39722e+08	6.51178e+08	1.0106e+07	6.07847e+08	4.20835e+08	3.3324e+08	1.57276e+08		3.06279e+08	6.11234e+08	4.23044e+08	3.03784e+08		0.150618	0.368064	0.496402	0.217741	0.308956	0.0198909
P32551	Cytochrome b-c1 complex subunit 2, mitochondrial OS=Rattus norvegicus GN=Uqcrc2 PE=1 SV=2 - [QCR2_RAT]	0	1.07071e+08	4.90849e+08	2.70317e+08	3.41462e+08	2.36559e+08	4.99151e+08	8.4189e+07	3.50735e+08	1.27169e+08	1.77491e+08	1.72269e+08		1.99307e+08	2.82779e+08	3.11358e+08	1.58977e+08		0.306265	0.295594	0.400578	0.415364	0.140625	0.0118194
P32851	Syntaxin-1A OS=Rattus norvegicus GN=Stx1a PE=1 SV=1 - [STX1A_RAT]	0	0	87887673	73761042	6.29725e+07	4.33928e+07	1.57444e+08	1.34577e+08	1.49838e+08	3.03806e+07	1.29641e+08	1.65849e+07		29295891	6.00421e+07	1.47286e+08	5.88689e+07		0.186029	0.008584	0.278104	0.00071878	0.0356095	0.488016
P34058	Heat shock protein HSP 90-beta OS=Rattus norvegicus GN=Hsp90ab1 PE=1 SV=4 - [HS90B_RAT]	0	0	2.64849e+08	5.19547e+07	1.63819e+08	0	2.31446e+08	0	209390732	1.35783e+08	180837551	0		8.8283e+07	71924590	1.46946e+08	1.0554e+08		0.439384	0.318464	0.437935	0.221402	0.337358	0.333984
P34926	Microtubule-associated protein 1A OS=Rattus norvegicus GN=Map1a PE=1 SV=1 - [MAP1A_RAT]	0	0	0	5.71678e+07	0	5.66674e+07	5.78332e+07	0	0	8.27999e+06	0	0		0	3.79451e+07	1.92777e+07	2.76e+06		0.0580621	0.18695	0.18695	0.264028	0.222056	0.0701924
P35435	ATP synthase subunit gamma, mitochondrial OS=Rattus norvegicus GN=Atp5c1 PE=1 SV=2 - [ATPG_RAT]	14984328	6.85401e+07	1.21544e+09	5.97531e+08	675338632	5.89214e+08	798568805	1.70744e+08	1.06921e+09	4.26201e+08	5.9641e+08	6.06423e+08		4.32987e+08	6.20695e+08	6.79508e+08	5.43011e+08		0.328719	0.315022	0.397421	0.418377	0.321349	0.147702
P35565	Calnexin OS=Rattus norvegicus GN=Canx PE=1 SV=1 - [CALX_RAT]	0	0	0	2.26788e+08	1.26703e+07	45322961	0	0	1.70814e+08	0	29093647	0		0	9.49269e+07	5.69379e+07	9.69788e+06		0.113599	0.18695	0.18695	0.343484	0.229668	0.137056
P35571	Glycerol-3-phosphate dehydrogenase, mitochondrial OS=Rattus norvegicus GN=Gpd2 PE=1 SV=1 - [GPDM_RAT]	29880169	2.41498e+07	1.11057e+09	6.28718e+08	4.55753e+08	4.38371e+08	6.52675e+08	3.44613e+07	6.78238e+08	4.10138e+08	4.03029e+08	4.1029e+08		3.882e+08	5.07614e+08	4.55125e+08	4.07819e+08		0.380372	0.440283	0.479644	0.411203	0.416591	0.0880517
P37377	Alpha-synuclein OS=Rattus norvegicus GN=Snca PE=1 SV=1 - [SYUA_RAT]	4.18768e+07	0	101693550	0	0	0	4.95893e+07	4.52845e+07	46783964	3.4466e+07	0	2.24316e+07		4.78568e+07	0	4.72192e+07	1.89659e+07		0.0900815	0.491906	0.203353	1.52149e-06	0.0250116	0.0667989
P38650	Cytoplasmic dynein 1 heavy chain 1 OS=Rattus norvegicus GN=Dync1h1 PE=1 SV=1 - [DYHC1_RAT]	0	0	4.92024e+08	434601479	4.08727e+08	2.5671e+08	3.77387e+08	2.67846e+07	3.19838e+08	1.76622e+08	2.7251e+08	432905902		1.64008e+08	3.66679e+08	2.41337e+08	2.94013e+08		0.153378	0.357124	0.255324	0.180999	0.354919	0.239352
P41565	Isocitrate dehydrogenase [NAD] subunit gamma 1, mitochondrial OS=Rattus norvegicus GN=Idh3g PE=2 SV=2 - [IDHG1_RAT]	0	0	9.13749e+08	5.73161e+08	607364485	384514475	404636847	21563558	4.61029e+08	3.92587e+08	71712797	5.60098e+08		3.04583e+08	5.2168e+08	2.95743e+08	3.41466e+08		0.262654	0.490088	0.459012	0.108687	0.41476	0.160392
P42123	L-lactate dehydrogenase B chain OS=Rattus norvegicus GN=Ldhb PE=1 SV=2 - [LDHB_RAT]	5.61927e+07	8.39073e+07	1.01283e+09	7.5164e+08	1.12334e+09	8.18023e+08	9.46487e+08	49312361	3.91977e+08	6.74202e+08	4.99035e+08	4.45645e+08		3.84311e+08	8.97668e+08	4.62592e+08	5.39627e+08		0.0998504	0.42874	0.327311	0.101006	0.394915	0.0276492
P45592	Cofilin-1 OS=Rattus norvegicus GN=Cfl1 PE=1 SV=3 - [COF1_RAT]	4.15362e+07	9.13013e+07	9.14321e+08	6.74495e+08	8.97936e+08	8.34538e+08	697991189	5.9446e+08	9.29906e+08	4.90277e+08	5.54382e+08	5.3728e+08		3.49053e+08	8.02323e+08	7.40786e+08	5.27313e+08		0.0969762	0.130745	0.281902	0.316718	0.0510448	0.00823676
P45953	Very long-chain specific acyl-CoA dehydrogenase, mitochondrial OS=Rattus norvegicus GN=Acadvl PE=1 SV=1 - [ACADV_RAT]	0	0	6.43377e+07	8.38803e+07	1.1176e+08	1.06238e+08	1.09501e+08	0	1.2419e+08	1.3889e+07	0	1.07374e+07		2.14459e+07	1.00626e+08	7.78967e+07	8.20878e+06		0.0132551	0.137453	0.288699	0.300542	0.0758457	0.000313095
P46462	Transitional endoplasmic reticulum ATPase OS=Rattus norvegicus GN=Vcp PE=1 SV=3 - [TERA_RAT]	0	0	6.03315e+07	0	7.23768e+07	7.25312e+07	2.96669e+07	3.87136e+07	5.77972e+07	19603386	1.45038e+08	72160847		2.01105e+07	4.83027e+07	4.20592e+07	7.8934e+07		0.210204	0.185023	0.11493	0.409434	0.189417	0.26079
P47709	Rabphilin-3A OS=Rattus norvegicus GN=Rph3a PE=1 SV=1 - [RP3A_RAT]	6.49622e+06	6.92869e+06	1.3874e+08	1.10321e+08	1.61642e+08	1.34901e+08	106387968	0	1.42478e+08	4.25668e+07	1.18542e+08	72590076		5.07217e+07	1.35621e+08	8.29552e+07	7.78996e+07		0.0707571	0.313583	0.305196	0.15463	0.460704	0.0479158
P47860	6-phosphofructokinase type C OS=Rattus norvegicus GN=Pfkp PE=1 SV=2 - [K6PP_RAT]	0	1.24788e+07	3.91374e+08	2.94055e+08	2.74187e+08	2.99587e+08	4.8757e+08	2.1075e+07	5.10517e+08	2.29283e+08	2.23953e+08	2.26583e+08		1.34618e+08	2.89277e+08	3.3972e+08	2.26606e+08		0.147815	0.186578	0.256725	0.383912	0.258641	0.000671616
P47875	Cysteine and glycine-rich protein 1 OS=Rattus norvegicus GN=Csrp1 PE=2 SV=2 - [CSRP1_RAT]	0	9.25732e+06	4.74318e+07	8.44792e+06	2.41013e+07	1.89952e+07	4.66086e+07	0	23375338	4.26384e+07	0	35283813		1.88964e+07	1.71815e+07	2.3328e+07	2.59741e+07		0.457886	0.416902	0.368097	0.343946	0.447492	0.281267
P47942	Dihydropyrimidinase-related protein 2 OS=Rattus norvegicus GN=Dpysl2 PE=1 SV=1 - [DPYL2_RAT]	1.18985e+09	2.41401e+08	9.302e+09	5.64871e+09	3.14939e+09	5313076177	5.92577e+09	1.00062e+09	7.17563e+09	4.25905e+09	5.10544e+09	5.88607e+09		3.57775e+09	4.70372e+09	4.70067e+09	5.08352e+09		0.362369	0.380164	0.31626	0.49944	0.426685	0.349429
P48500	Triosephosphate isomerase OS=Rattus norvegicus GN=Tpi1 PE=1 SV=2 - [TPIS_RAT]	7.58611e+06	3.57894e+07	2.15628e+09	1.56955e+09	1.18227e+09	8.86646e+08	1.08604e+09	3.08301e+08	1.40881e+09	8.98024e+08	1.53431e+09	1.63607e+09		7.33218e+08	1.21282e+09	9.34382e+08	1.35614e+09		0.275744	0.404954	0.225933	0.25312	0.175595	0.330957
P48721	Stress-70 protein, mitochondrial OS=Rattus norvegicus GN=Hspa9 PE=1 SV=3 - [GRP75_RAT]	2.93444e+08	8.79381e+07	2.75428e+09	2.26392e+09	2.57589e+09	1.41677e+09	1.98084e+09	5.40533e+08	2.35673e+09	1.46277e+09	1.72997e+09	1.47306e+09		1.04522e+09	2.08553e+09	1.62604e+09	1.55527e+09		0.161584	0.299734	0.292734	0.260192	0.452798	0.105901
P48768	Sodium/calcium exchanger 2 OS=Rattus norvegicus GN=Slc8a2 PE=2 SV=1 - [NAC2_RAT]	0	0	5.58689e+07	3.71581e+07	9.36156e+07	5.98809e+06	9.61206e+07	7.59684e+07	1.25661e+08	1.37252e+07	7.03902e+07	8.56738e+07		1.8623e+07	45587260	9.925e+07	5.65964e+07		0.221409	0.0133619	0.128433	0.0711348	0.0895197	0.38019
P49432	Pyruvate dehydrogenase E1 component subunit beta, mitochondrial OS=Rattus norvegicus GN=Pdhb PE=1 SV=2 - [ODPB_RAT]	2.96335e+08	2.75855e+08	4.6341e+09	2.1584e+09	3.04725e+09	2.66921e+09	4.17728e+09	2.98856e+08	5.30772e+09	2.14819e+09	2.85072e+09	1.98307e+09		1.73543e+09	2.62495e+09	3.26129e+09	2.32733e+09		0.289131	0.253654	0.354227	0.350183	0.288456	0.233271
P50399	Rab GDP dissociation inhibitor beta OS=Rattus norvegicus GN=Gdi2 PE=1 SV=2 - [GDIB_RAT]	0	0	1.54716e+07	8.50571e+06	1.56833e+07	0	0	0	2.76813e+07	1.47617e+07	0	1.905e+07		5.1572e+06	8.06302e+06	9.22711e+06	1.12706e+07		0.346951	0.359908	0.236866	0.45765	0.430096	0.34228
P50554	4-aminobutyrate aminotransferase, mitochondrial OS=Rattus norvegicus GN=Abat PE=1 SV=3 - [GABT_RAT]	0	3.02374e+07	2.325e+09	1.12803e+09	1.4049e+08	1.0193e+09	1.27768e+09	2.2223e+08	1.0571e+09	7.67332e+08	9.10709e+08	7.84882e+08		7.8508e+08	7.62604e+08	8.52338e+08	8.20975e+08		0.48986	0.469814	0.482557	0.425574	0.463835	0.431194
P51650	Succinate-semialdehyde dehydrogenase, mitochondrial OS=Rattus norvegicus GN=Aldh5a1 PE=1 SV=2 - [SSDH_RAT]	72026304	4.22884e+07	1.65776e+09	1.95894e+09	9.83444e+08	8.11273e+08	1.94117e+09	3.88125e+06	1.81955e+09	1.13742e+09	1426794695	1.37666e+09		5.90693e+08	1.25122e+09	1.25487e+09	1.31362e+09		0.180912	0.232435	0.126212	0.498104	0.465243	0.436842
P52873	Pyruvate carboxylase, mitochondrial OS=Rattus norvegicus GN=Pc PE=1 SV=2 - [PYC_RAT]	6.43014e+07	1.02462e+08	1.30271e+09	1.45206e+09	8.82511e+08	1.28405e+09	9.64907e+08	3.29636e+07	2.22634e+09	7.98711e+08	1.41986e+09	1.18379e+09		4.89825e+08	1.20621e+09	1.07474e+09	1.13412e+09		0.0895298	0.240736	0.110641	0.425647	0.466356	0.392718
P53534	Glycogen phosphorylase, brain form (Fragment) OS=Rattus norvegicus GN=Pygb PE=1 SV=3 - [PYGB_RAT]	0	0	1.45963e+08	1.02187e+08	0	0	1.53896e+07	0	4.29763e+07	6.35749e+07	1.52088e+08	1.00594e+08		4.86544e+07	3.40624e+07	1.94553e+07	1.05419e+08		0.409008	0.296187	0.180206	0.354015	0.0198151	0.0848102
P54311	Guanine nucleotide-binding protein G(I)/G(S)/G(T) subunit beta-1 OS=Rattus norvegicus GN=Gnb1 PE=1 SV=4 - [GBB1_RAT]	67493402	0	4.68353e+08	4.08209e+08	2.17784e+08	4.31797e+08	5.19213e+08	4.61942e+08	478741462	6.06204e+08	343966777	1.92976e+08		1.78616e+08	3.52596e+08	4.86632e+08	3.81049e+08		0.170479	0.052232	0.172884	0.0637135	0.217656	0.423596
P54313	Guanine nucleotide-binding protein G(I)/G(S)/G(T) subunit beta-2 OS=Rattus norvegicus GN=Gnb2 PE=1 SV=4 - [GBB2_RAT]	0	0	3.56935e+08	2.19778e+08	2.17108e+08	1.69474e+08	2.6708e+08	0	2.22955e+08	2.58169e+08	1.67274e+08	222280216		1.18978e+08	2.0212e+08	1.63345e+08	2.15908e+08		0.263419	0.387349	0.235483	0.334642	0.288705	0.340106
P55161	Nck-associated protein 1 OS=Rattus norvegicus GN=Nckap1 PE=2 SV=1 - [NCKP1_RAT]	0	0	3.13506e+07	3.79476e+07	2.91071e+07	1.44984e+07	41881838	0	1.8471e+07	19172837	4.8642e+07	2.86999e+07		1.04502e+07	27184353	2.01176e+07	3.21716e+07		0.12565	0.28917	0.0925593	0.319128	0.232051	0.337584
P56571	ES1 protein homolog, mitochondrial OS=Rattus norvegicus PE=1 SV=2 - [ES1_RAT]	4.41412e+08	8.78418e+07	2.43225e+09	8.68697e+08	1.16494e+09	1.20354e+09	9.71172e+08	3.75213e+08	7.27391e+08	4.73379e+08	1.53592e+09	1.52405e+09		9.87169e+08	1.07906e+09	6.91258e+08	1.17778e+09		0.453416	0.356644	0.412785	0.0641782	0.141398	0.400817
P56574	Isocitrate dehydrogenase [NADP], mitochondrial OS=Rattus norvegicus GN=Idh2 PE=1 SV=2 - [IDHP_RAT]	0	0	230529500	3.28452e+08	270951148	2.7796e+08	3.99953e+08	0	4.47757e+08	63200870	5.51824e+07	7.94239e+07		7.68432e+07	2.92455e+08	2.8257e+08	6.59357e+07		0.0261938	0.13575	0.447218	0.474124	0.101077	0.000155834
P59215	Guanine nucleotide-binding protein G(o) subunit alpha OS=Rattus norvegicus GN=Gnao1 PE=1 SV=2 - [GNAO_RAT]	54029458	8.31748e+07	3.00099e+09	1.79354e+09	9.87668e+08	1.72342e+09	1.97294e+09	4.01909e+08	2.17589e+09	1.09577e+09	1.73424e+09	1.86354e+09		1.04607e+09	1.50154e+09	1.51691e+09	1.56452e+09		0.337823	0.348756	0.316722	0.49066	0.470713	0.43305
P60203	Myelin proteolipid protein OS=Rattus norvegicus GN=Plp1 PE=1 SV=2 - [MYPR_RAT]	0	5.95218e+07	4.24843e+08	472511244	140658704	4.00198e+08	2.57361e+08	5.39373e+07	374898340	3.08932e+08	3.58179e+08	1.24977e+08		1.61455e+08	3.37789e+08	2.28732e+08	2.6403e+08		0.174902	0.350108	0.266572	0.23623	0.389492	0.290866
P60711	Actin, cytoplasmic 1 OS=Rattus norvegicus GN=Actb PE=1 SV=1 - [ACTB_RAT]	2.4125e+09	7.36598e+08	1.61864e+10	1.07079e+10	6.90758e+09	1.35032e+10	5.33109e+09	1.02809e+09	1.1714e+10	8.99275e+09	1.16261e+10	9.77454e+09		6.44515e+09	1.03729e+10	6.0244e+09	1.01311e+10		0.248156	0.472807	0.249193	0.149421	0.134393	0.45621
P60881	Synaptosomal-associated protein 25 OS=Rattus norvegicus GN=Snap25 PE=1 SV=1 - [SNP25_RAT]	3.9457e+07	5.61466e+07	1.42602e+09	9.72537e+08	1.10704e+09	1.08964e+09	6.12316e+08	3.80748e+08	5.66021e+08	1.02024e+09	5.07527e+08	6.49598e+08		5.07209e+08	1.0564e+09	5.19695e+08	7.25789e+08		0.149861	0.489929	0.337534	0.0014336	0.144101	0.0527056
P61265	Syntaxin-1B OS=Rattus norvegicus GN=Stx1b PE=1 SV=1 - [STX1B_RAT]	1.79348e+07	2.06862e+07	154110543	202384476	1.10631e+08	3.01782e+08	419843282	8.36354e+07	4.40553e+08	2.01498e+08	95346632	1.86853e+08		6.42439e+07	2.04932e+08	3.14677e+08	1.61232e+08		0.0596321	0.0568771	0.0788224	0.220062	0.135667	0.267372
P61765	Syntaxin-binding protein 1 OS=Rattus norvegicus GN=Stxbp1 PE=1 SV=1 - [STXB1_RAT]	3.16287e+08	670350545	6.97542e+09	4.16708e+09	3.94917e+09	3.50335e+09	3.71294e+09	1.40319e+09	4.21271e+09	2.81158e+09	3.2474e+09	5.34436e+09		2.65402e+09	3.8732e+09	3.10961e+09	3.80111e+09		0.302263	0.427246	0.322077	0.218951	0.292557	0.46651
P61983	14-3-3 protein gamma OS=Rattus norvegicus GN=Ywhag PE=1 SV=2 - [1433G_RAT]	0	1.41133e+07	4.48557e+07	18376612	0	2.20172e+07	73172419	0	3.12382e+07	39064829	5.28237e+07	5.6967e+07		1.96563e+07	1.34646e+07	3.48035e+07	4.96185e+07		0.349458	0.288602	0.052146	0.196079	0.26772	0.00709996
P62161	Calmodulin OS=Rattus norvegicus GN=Calm1 PE=1 SV=2 - [CALM_RAT]	3.25769e+07	2.89957e+07	1.94135e+08	9.12301e+07	1.60534e+07	9.08765e+07	3.32675e+07	8.94064e+07	3.31245e+08	1.62034e+08	4.30324e+07	1.7487e+08		8.52359e+07	6.60533e+07	1.51306e+08	1.26645e+08		0.382452	0.284145	0.289735	0.209612	0.409198	0.141321
P62260	14-3-3 protein epsilon OS=Rattus norvegicus GN=Ywhae PE=1 SV=1 - [1433E_RAT]	0	0	6.73137e+07	4.40659e+08	4.30079e+08	3.58649e+08	0	2.07152e+08	60199884	250725186	3.51935e+08	4.30712e+07		2.24379e+07	4.09796e+08	8.91171e+07	2.15244e+08		0.000172375	0.183076	0.0542833	0.00429874	0.157293	0.054286
P62815	V-type proton ATPase subunit B, brain isoform OS=Rattus norvegicus GN=Atp6v1b2 PE=1 SV=1 - [VATB2_RAT]	1.49976e+08	5.34747e+07	1.20236e+09	7.20517e+08	1.27799e+09	1.01036e+09	1.04988e+09	4.32338e+07	1.62425e+09	664613155	4.25545e+08	5.54911e+08		4.68602e+08	1.00295e+09	9.05786e+08	5.48356e+08		0.127062	0.250142	0.420857	0.426134	0.243438	0.0301777
P62944	AP-2 complex subunit beta OS=Rattus norvegicus GN=Ap2b1 PE=1 SV=1 - [AP2B1_RAT]	6.23966e+06	1.47822e+07	0	2.0179e+08	3.81113e+07	2.50361e+08	3.84627e+08	1.85504e+07	4.08887e+08	2.25395e+07	160855020	1.21636e+08		7.00729e+06	1.63421e+08	2.70688e+08	1.01677e+08		0.0359605	0.052585	0.0420271	0.245523	0.136041	0.231785
P63012	Ras-related protein Rab-3A OS=Rattus norvegicus GN=Rab3a PE=1 SV=1 - [RAB3A_RAT]	0	8.83568e+07	2.00038e+08	1.66408e+08	4.63134e+08	1.15489e+08	5.85171e+08	7.87183e+08	5.60379e+08	1.45695e+08	4.26829e+08	4.57583e+08		9.61315e+07	2.48344e+08	6.44245e+08	3.43369e+08		0.141589	0.00201151	0.0488727	0.019115	0.0349923	0.276559
P63018	Heat shock cognate 71 kDa protein OS=Rattus norvegicus GN=Hspa8 PE=1 SV=1 - [HSP7C_RAT]	68797343	1.03363e+08	1333169907	1.17481e+09	8.18392e+08	1.17993e+09	1.16099e+09	1.1861e+08	1.55036e+09	8.90011e+08	1.34337e+09	6.88349e+08		5.01777e+08	1.05771e+09	9.43322e+08	9.73912e+08		0.134105	0.250061	0.180761	0.404667	0.475576	0.365736
P63039	60 kDa heat shock protein, mitochondrial OS=Rattus norvegicus GN=Hspd1 PE=1 SV=1 - [CH60_RAT]	2.25739e+08	4.59959e+08	5.74882e+09	4.71464e+09	6.09543e+09	5.92562e+09	5.94611e+09	2.86895e+09	3.8328e+09	3.75205e+09	4405550099	4.93096e+09		2.14484e+09	5.57856e+09	4.21595e+09	4.36285e+09		0.0689038	0.181512	0.14669	0.123787	0.443513	0.0463093
Q63666;P63045	Vesicle-associated membrane protein 1 OS=Rattus norvegicus GN=Vamp1 PE=1 SV=2 - [VAMP1_RAT]/Vesicle-associated membrane protein 2 OS=Rattus norvegicus GN=Vamp2 PE=1 SV=2 - [VAMP2_RAT]	118581438	6.67937e+06	1.83383e+08	9.34184e+07	2.87987e+08	2.74271e+08	598867684	3.05938e+08	5.10294e+08	3.65822e+08	135488649	261675148		1.02881e+08	2.18559e+08	4.717e+08	2.54329e+08		0.113708	0.0108451	0.0733264	0.0386071	0.0588711	0.357835
P63100	Calcineurin subunit B type 1 OS=Rattus norvegicus GN=Ppp3r1 PE=1 SV=2 - [CANB1_RAT]	0	0	0	2.89644e+07	5.32162e+07	23837703	32302771	0	0	3.89049e+07	0	7.69605e+07		0	3.53394e+07	1.07676e+07	3.86218e+07		0.00876652	0.18695	0.0785669	0.0778592	0.161159	0.448898
P63102	14-3-3 protein zeta/delta OS=Rattus norvegicus GN=Ywhaz PE=1 SV=1 - [1433Z_RAT]	3.39737e+07	3.0763e+07	3.96924e+08	1.73203e+08	6.94099e+08	8.41046e+08	2.67395e+08	5.4988e+08	1.98677e+08	5.38982e+08	1.51589e+08	2.39738e+08		1.53887e+08	5.69449e+08	3.38651e+08	3.10103e+08		0.0767067	0.159149	0.203623	0.185597	0.433133	0.165016
P63319	Protein kinase C gamma type OS=Rattus norvegicus GN=Prkcg PE=1 SV=1 - [KPCG_RAT]	0	0	0	1.41578e+08	116878851	9.14226e+07	1.12184e+08	0	1.16773e+08	0	8.22741e+07	108002787		0	1.16626e+08	7.63193e+07	6.34256e+07		0.000644987	0.0581381	0.0616689	0.189747	0.404961	0.10492
P63329	Serine/threonine-protein phosphatase 2B catalytic subunit alpha isoform OS=Rattus norvegicus GN=Ppp3ca PE=1 SV=1 - [PP2BA_RAT]	1.49221e+07	5.64104e+07	1.91091e+08	1.05305e+08	4.06648e+08	2.66327e+08	3.6212e+08	3.86551e+07	4.5622e+08	2.36835e+08	2.39932e+08	1.41536e+08		8.74743e+07	2.59426e+08	2.85665e+08	2.06101e+08		0.083578	0.111021	0.0646122	0.436297	0.287525	0.298264
P67779	Prohibitin OS=Rattus norvegicus GN=Phb PE=1 SV=1 - [PHB_RAT]	0	2.83418e+06	1.57416e+08	1.3208e+08	1.22542e+08	1.75155e+08	2.217e+08	6.12034e+07	1.92804e+08	123250893	1.52987e+08	1.7356e+08		5.34166e+07	1.43259e+08	1.58569e+08	149932578		0.0871934	0.108253	0.0742549	0.391491	0.437484	0.387382
P68255	14-3-3 protein theta OS=Rattus norvegicus GN=Ywhaq PE=1 SV=1 - [1433T_RAT]	0	8.80785e+06	2.43904e+07	1.44302e+07	7.30081e+07	63938455	9.75151e+07	1.00757e+08	33766886	9.34908e+07	19144619	2.35933e+07		1.10661e+07	5.04589e+07	7.73465e+07	4.54096e+07		0.0570777	0.0223143	0.121593	0.198753	0.190603	0.437627
P68370	Tubulin alpha-1A chain OS=Rattus norvegicus GN=Tuba1a PE=1 SV=1 - [TBA1A_RAT]	0	0	1.51225e+08	1.71765e+08	8.08474e+07	45063492	93355521	1.82459e+07	175272384	3.89684e+07	2.65786e+08	3.04252e+08		5.04084e+07	9.92253e+07	9.56246e+07	2.03002e+08		0.240686	0.270671	0.0952295	0.477123	0.159364	0.15877
P68403	Protein kinase C beta type OS=Rattus norvegicus GN=Prkcb PE=1 SV=3 - [KPCB_RAT]	477689	4.12983e+06	8.81277e+07	23186234	111836631	4.2051e+07	7.56075e+07	8.19622e+06	1.29693e+08	5.32096e+07	2.60746e+07	1.86145e+07		3.09117e+07	5.90246e+07	7.11656e+07	3.26329e+07		0.257093	0.212341	0.47885	0.398791	0.176389	0.20668
P68511	14-3-3 protein eta OS=Rattus norvegicus GN=Ywhah PE=1 SV=2 - [1433F_RAT]	0	0	278310494	2.23907e+07	6.9332e+07	2.27341e+08	0	4.90187e+06	0	0	1.18901e+08	0		9.27702e+07	1.06354e+08	1.63396e+06	3.96335e+07		0.454485	0.190798	0.313122	0.0832767	0.196166	0.207901
P69897	Tubulin beta-5 chain OS=Rattus norvegicus GN=Tubb5 PE=1 SV=1 - [TBB5_RAT]	6.67681e+07	3.67458e+07	1298333443	4.83546e+08	3.69444e+08	8.49617e+08	6.91382e+08	2.58755e+08	0	268816054	5.17104e+08	2.80488e+08		4.67282e+08	5.67536e+08	3.16712e+08	3.55469e+08		0.415493	0.380406	0.402385	0.184777	0.433554	0.135133
P70580	Membrane-associated progesterone receptor component 1 OS=Rattus norvegicus GN=Pgrmc1 PE=1 SV=3 - [PGRC1_RAT]	7.79844e+06	2.53663e+07	214427902	2.30383e+08	3.18243e+08	144437117	2.64552e+08	0	3.57848e+08	1.99377e+08	1.98168e+08	2.33878e+08		8.25309e+07	2.31021e+08	2.07466e+08	2.10474e+08		0.0740964	0.188669	0.0647652	0.425967	0.48954	0.355207
P81155	Voltage-dependent anion-selective channel protein 2 OS=Rattus norvegicus GN=Vdac2 PE=1 SV=2 - [VDAC2_RAT]	0	0	2.19306e+08	2.14403e+08	1.30536e+08	1.41203e+08	1.31605e+08	0	3.2348e+08	38743661	1.22128e+08	4.92635e+07		7.31019e+07	1.62047e+08	151694843	7.00451e+07		0.158106	0.272557	0.485244	0.460295	0.224756	0.0343004
P82471	Guanine nucleotide-binding protein G(q) subunit alpha OS=Rattus norvegicus GN=Gnaq PE=1 SV=2 - [GNAQ_RAT]	0	0	1.3883e+08	56555633	3.6196e+07	3.19615e+07	4.73537e+07	0	0	4.13383e+07	0	7.60297e+07		4.62767e+07	4.1571e+07	1.57846e+07	3.91227e+07		0.46245	0.283335	0.447845	0.107469	0.218515	0.460602
P84076	Neuron-specific calcium-binding protein hippocalcin OS=Rattus norvegicus GN=Hpca PE=1 SV=2 - [HPCA_RAT]	0	4.63157e+06	3.33205e+07	32153825	19967406	5.08459e+07	5.01326e+07	0	4.49033e+07	2.23625e+07	3.68271e+07	1.90392e+07		1.26507e+07	3.43224e+07	3.16786e+07	2.60763e+07		0.0951409	0.186861	0.158744	0.445972	0.377914	0.238264
P84092	AP-2 complex subunit mu OS=Rattus norvegicus GN=Ap2m1 PE=1 SV=1 - [AP2M1_RAT]	7.57246e+07	2.08915e+07	5.75122e+08	4.55666e+08	2.83241e+08	3.68453e+08	2.16751e+08	1.1049e+08	4.95609e+08	1.96095e+08	3.41531e+08	339007964		2.23913e+08	3.6912e+08	2.74283e+08	2.92211e+08		0.23619	0.411286	0.363787	0.245401	0.446227	0.164329
P85108	Tubulin beta-2A chain OS=Rattus norvegicus GN=Tubb2a PE=1 SV=1 - [TBB2A_RAT]	3.10497e+08	5.6047e+07	3933510332	3.05058e+09	3.38403e+09	2.14653e+09	5.03587e+09	2.48818e+09	4.67072e+09	2.02648e+09	3.38065e+09	3.64016e+09		1.43335e+09	2.86038e+09	4.06492e+09	3.01576e+09		0.167912	0.0753754	0.152853	0.1208	0.163363	0.407526
P85515	Alpha-centractin OS=Rattus norvegicus GN=Actr1a PE=1 SV=1 - [ACTZ_RAT]	0	2.45487e+07	1.94972e+07	2.25477e+08	1.651e+08	2.87124e+07	148816810	0	1.13122e+08	0	1.08427e+08	92398165		1.4682e+07	1.39763e+08	8.73129e+07	6.69418e+07		0.0500066	0.0927386	0.102774	0.257386	0.367576	0.170036
P85834	Elongation factor Tu, mitochondrial OS=Rattus norvegicus GN=Tufm PE=1 SV=1 - [EFTU_RAT]	0	3.18057e+07	42032055	1.10517e+08	70667546	1.32431e+08	1.27105e+08	7.34896e+07	191647383	2.19132e+08	1.2601e+08	1.12031e+08		2.46126e+07	1.04539e+08	1.30747e+08	1.52391e+08		0.0111605	0.0217596	0.0118184	0.267437	0.337469	0.139101
P97532	3-mercaptopyruvate sulfurtransferase OS=Rattus norvegicus GN=Mpst PE=1 SV=3 - [THTM_RAT]	7.29407e+06	1.61624e+07	5.8764e+07	4.09713e+07	5.08825e+07	2.02191e+07	7.33022e+07	3.13044e+07	63225443	4.12983e+07	1.91249e+07	5.3747e+07		2.74068e+07	3.73576e+07	5.5944e+07	3.80567e+07		0.307518	0.116376	0.301027	0.149025	0.165868	0.480691
P97546	Neuroplastin OS=Rattus norvegicus GN=Nptn PE=1 SV=2 - [NPTN_RAT]	3.62454e+07	1.3256e+07	6.49685e+08	5.20072e+08	7.12169e+08	3.61959e+08	6.54706e+08	6.11649e+08	6.12331e+08	5.47584e+08	7.13076e+08	6.37218e+08		2.33062e+08	5.314e+08	6.26229e+08	6.32626e+08		0.133676	0.0664826	0.0675275	0.203105	0.452091	0.208573
P97710	Tyrosine-protein phosphatase non-receptor type substrate 1 OS=Rattus norvegicus GN=Sirpa PE=1 SV=1 - [SHPS1_RAT]	0	8.55191e+06	0	1.45723e+08	96885864	8635701	1.65454e+08	0	1.80069e+08	1.4016e+08	1.99971e+08	180168286		2.85064e+06	8.37483e+07	1.15174e+08	173433209		0.0572976	0.0619805	0.000332747	0.339016	0.194558	0.055003
P97849	Long-chain fatty acid transport protein 1 OS=Rattus norvegicus GN=Slc27a1 PE=2 SV=1 - [S27A1_RAT]	0	0	162267899	1.50822e+07	9.57567e+07	3.98512e+07	9.66986e+07	0	85981373	0	4.80972e+07	136468447		5.40893e+07	5.02301e+07	6.08933e+07	6.15219e+07		0.475542	0.459046	0.45866	0.398544	0.495317	0.410121
Q00981	Ubiquitin carboxyl-terminal hydrolase isozyme L1 OS=Rattus norvegicus GN=Uchl1 PE=1 SV=2 - [UCHL1_RAT]	1.64416e+07	0	4.34789e+08	206062128	1.95135e+08	1.55995e+08	2.62261e+08	1.85604e+07	8.78264e+07	77366242	1.24287e+08	1.5607e+08		1.5041e+08	1.85731e+08	1.22883e+08	1.19241e+08		0.408584	0.435749	0.419664	0.221997	0.482045	0.0362977
Q01062	cGMP-dependent 3',5'-cyclic phosphodiesterase OS=Rattus norvegicus GN=Pde2a PE=1 SV=2 - [PDE2A_RAT]	0	0	9.73283e+07	119178269	1.0681e+08	0	2.94199e+07	0	0	2.03881e+07	0	1.49652e+07		3.24428e+07	7.53293e+07	9.80663e+06	1.17844e+07		0.219016	0.270385	0.282688	0.0844771	0.43616	0.0863083
Q01205	Dihydrolipoyllysine-residue succinyltransferase component of 2-oxoglutarate dehydrogenase complex, mitochondrial OS=Rattus norvegicus GN=Dlst PE=1 SV=2 - [ODO2_RAT]	0	3.4002e+07	4.71459e+08	9.19128e+07	2.51771e+08	1.58531e+08	6.09005e+08	3.53514e+08	539422294	3.56553e+08	337774611	2.79966e+08		1.68487e+08	1.67405e+08	5.00647e+08	3.24765e+08		0.497444	0.06111	0.183161	0.0101132	0.0459277	0.0192111
Q02253	Methylmalonate-semialdehyde dehydrogenase [acylating], mitochondrial OS=Rattus norvegicus GN=Aldh6a1 PE=1 SV=1 - [MMSA_RAT]	0	0	2.418e+08	64995621	4.22468e+08	234074473	1.22996e+08	3.00042e+07	1.67159e+08	9.19613e+07	172448181	1.78234e+07		8.06e+07	2.40513e+08	1.0672e+08	9.40776e+07		0.144584	0.393229	0.445391	0.147013	0.422	0.131443
Q02563	Synaptic vesicle glycoprotein 2A OS=Rattus norvegicus GN=Sv2a PE=1 SV=2 - [SV2A_RAT]	0	7.56177e+07	84371202	3.70817e+08	3.15156e+08	1.39357e+08	3.98967e+08	2.55482e+07	5.9443e+08	99334822	234143582	1.09532e+08		5.33296e+07	2.7511e+08	3.39648e+08	1.4767e+08		0.0206085	0.0827529	0.0688527	0.369626	0.163951	0.0978183
Q03344	ATPase inhibitor, mitochondrial OS=Rattus norvegicus GN=Atpif1 PE=2 SV=2 - [ATIF1_RAT]	7.32386e+06	0	20205458	3.27806e+08	3.49578e+08	6.51354e+07	3.48263e+08	4.01313e+06	5.61951e+08	1.16864e+07	0	3.95468e+08		9.17644e+06	2.47507e+08	3.04742e+08	1.35718e+08		0.0299588	0.0716567	0.192825	0.387098	0.231088	0.260201
Q04940	Neurogranin OS=Rattus norvegicus GN=Nrgn PE=1 SV=1 - [NEUG_RAT]	0	4.42412e+06	0	3.78156e+07	1.35756e+08	8.47276e+07	1.86279e+08	0	1.55529e+08	1.89475e+08	0	7.67184e+07		1.47471e+06	8.60997e+07	1.13936e+08	8.87313e+07		0.0202049	0.061483	0.0940533	0.343514	0.383814	0.484056
Q05140	Clathrin coat assembly protein AP180 OS=Rattus norvegicus GN=Snap91 PE=1 SV=1 - [AP180_RAT]	4.19919e+07	9.39382e+06	669535272	5.24275e+08	4.61292e+08	4.0372e+08	3.75704e+07	71861300	4.78797e+08	3.35063e+08	4.19358e+08	283253812		2.40307e+08	463095810	1.96076e+08	3.45891e+08		0.181915	0.435942	0.327062	0.070622	0.183101	0.0452594
Q05962	ADP/ATP translocase 1 OS=Rattus norvegicus GN=Slc25a4 PE=1 SV=3 - [ADT1_RAT]	5.09629e+06	1.4216e+07	0	1.95621e+08	1.62164e+08	2.01516e+08	3.11881e+08	1.52075e+08	3.60099e+08	1.49522e+08	1.86348e+08	1.88292e+08		6.43743e+06	1.86434e+08	2.74685e+08	1.74721e+08		7.74402e-05	0.00653864	0.000111658	0.12015	0.0969929	0.270893
Q06647	ATP synthase subunit O, mitochondrial OS=Rattus norvegicus GN=Atp5o PE=1 SV=1 - [ATPO_RAT]	9.09368e+07	1.61708e+08	2271549494	2.26401e+09	1.1733e+09	1.35227e+09	2.3903e+09	1.21987e+08	2.33497e+09	1.686e+09	2.62817e+09	1.3758e+09		8.41398e+08	1.59653e+09	1.61575e+09	1.89666e+09		0.196928	0.247843	0.1309	0.491206	0.376959	0.292433
Q09073	ADP/ATP translocase 2 OS=Rattus norvegicus GN=Slc25a5 PE=1 SV=3 - [ADT2_RAT]	4.50016e+06	6.13372e+06	3.2672e+07	1.02493e+08	1.00223e+08	18808345	44883836	1.69163e+08	4.39463e+07	5.28639e+07	1.25475e+08	1.77019e+08		1.44353e+07	7.38416e+07	8.59978e+07	1.18453e+08		0.0549361	0.0840398	0.0244103	0.409701	0.293459	0.190364
Q1WIM2	Cell adhesion molecule 2 OS=Rattus norvegicus GN=Cadm2 PE=1 SV=2 - [CADM2_RAT]	0	0	1.32646e+08	2.08706e+08	54182519	4.53355e+07	35851022	4.5269e+07	131176570	5.70346e+07	5.91801e+07	1.52787e+08		4.42155e+07	1.02742e+08	7.07655e+07	8.96673e+07		0.222219	0.32322	0.224934	0.314201	0.344071	0.421305
Q2TA68	Dynamin-like 120 kDa protein, mitochondrial OS=Rattus norvegicus GN=Opa1 PE=1 SV=1 - [OPA1_RAT]	3.65409e+06	1.55845e+07	1.09119e+09	8.78094e+08	6.65957e+08	5.19033e+08	5.45134e+08	4.04768e+08	8.27136e+08	6.01597e+08	5.95835e+08	7.87748e+08		3.70142e+08	6.87695e+08	5.92346e+08	6.61727e+08		0.222565	0.29568	0.235129	0.29403	0.322255	0.420797
Q3KR86	Mitochondrial inner membrane protein (Fragment) OS=Rattus norvegicus GN=Immt PE=1 SV=1 - [IMMT_RAT]	1.39517e+07	4.66396e+07	6.01491e+08	2.59447e+08	4.68456e+08	1.16445e+08	3.51214e+08	1.15952e+08	1.45704e+08	7.36211e+07	2.74275e+08	3.06923e+08		2.20694e+08	2.81449e+08	2.0429e+08	2.18273e+08		0.396367	0.469956	0.495552	0.286935	0.44971	0.320657
Q3ZB98	Breast carcinoma-amplified sequence 1 homolog (Fragment) OS=Rattus norvegicus GN=Bcas1 PE=1 SV=2 - [BCAS1_RAT]	1.24288e+06	5.66827e+07	2.32186e+08	1.65883e+08	3.87052e+08	2.33906e+08	1.71463e+08	3.5384e+06	2.09113e+08	2.15538e+08	2.39273e+08	1.71257e+08		9.67038e+07	2.6228e+08	1.28038e+08	2.08689e+08		0.0790111	0.377822	0.0984204	0.106979	0.145215	0.238483
Q4QRB4	Tubulin beta-3 chain OS=Rattus norvegicus GN=Tubb3 PE=1 SV=1 - [TBB3_RAT]	0	0	1.48498e+09	1.2541e+09	1269866704	5.99986e+08	1327668242	8.56853e+08	1.38399e+09	8.77362e+08	1.55665e+09	1.36687e+09		4.94994e+08	1.04132e+09	1.1895e+09	1.26696e+09		0.185233	0.127241	0.111172	0.310421	0.391287	0.246523
Q4V8F9	Hydroxysteroid dehydrogenase-like protein 2 OS=Rattus norvegicus GN=Hsdl2 PE=2 SV=1 - [HSDL2_RAT]	0	0	4.80207e+07	9.79125e+07	1.00845e+08	6.34659e+07	117887878	2.93682e+07	8.13468e+07	6.48439e+07	2.71409e+07	2.73612e+07		1.60069e+07	8.74079e+07	7.6201e+07	3.9782e+07		0.0116986	0.0587881	0.15356	0.356388	0.135757	0.0258228
Q561S0	NADH dehydrogenase [ubiquinone] 1 alpha subcomplex subunit 10, mitochondrial OS=Rattus norvegicus GN=Ndufa10 PE=1 SV=1 - [NDUAA_RAT]	3.16819e+07	0	7.09945e+08	5.31348e+08	3.31868e+08	280443467	3.77024e+08	8.52092e+07	3.8547e+08	2.4864e+08	5.54593e+08	458962843		2.47209e+08	3.8122e+08	2.82568e+08	4.20732e+08		0.30594	0.447537	0.261778	0.236893	0.180105	0.377687
Q566R0	Thioesterase superfamily member 4 OS=Rattus norvegicus GN=Them4 PE=2 SV=1 - [THEM4_RAT]	0	0	319094421	0	71831603	1.95261e+08	1.64938e+08	0	1.31454e+08	2.20047e+08	1.45551e+08	7.14983e+07		106364807	8.9031e+07	9.87972e+07	1.45699e+08		0.446369	0.475904	0.374441	0.452013	0.258652	0.235748
Q5BJU7	Wiskott-Aldrich syndrome protein family member 1 OS=Rattus norvegicus GN=Wasf1 PE=2 SV=1 - [WASF1_RAT]	0	4.5593e+06	184631746	1.93252e+08	2.88619e+08	1.29501e+08	1.50716e+08	1.28816e+07	2.88565e+08	1.03629e+08	1.58709e+08	1.14894e+08		6.30637e+07	2.03791e+08	1.50721e+08	1.25744e+08		0.0696022	0.21542	0.188304	0.297548	0.387053	0.0938987
Q5BK63	NADH dehydrogenase [ubiquinone] 1 alpha subcomplex subunit 9, mitochondrial OS=Rattus norvegicus GN=Ndufa9 PE=1 SV=2 - [NDUA9_RAT]	0	0	1.69473e+08	0	83984360	4.35117e+07	4.56424e+07	0	5.00394e+07	3.43207e+07	8.9366e+07	4.80254e+07		5.6491e+07	4.24987e+07	31893954	5.72374e+07		0.415556	0.348389	0.495245	0.366782	0.166303	0.320997
Q5EB62	Solute carrier family 25 member 46 OS=Rattus norvegicus GN=Slc25a46 PE=2 SV=2 - [S2546_RAT]	0	0	2.82168e+07	6.04075e+07	6.64936e+07	5.37021e+07	1.5718e+07	0	50858026	49457671	4.6652e+07	6.71153e+07		9.40561e+06	6.02011e+07	2.2192e+07	5.44083e+07		0.00367511	0.255394	0.00837527	0.0350272	0.0599859	0.238574
Q5FVI4	Cell cycle exit and neuronal differentiation protein 1 OS=Rattus norvegicus GN=Cend1 PE=1 SV=1 - [CEND_RAT]	0	8.0432e+07	1.59475e+09	5.35192e+08	1042298353	1.25396e+09	1.37478e+09	0	1.79812e+09	881446514	1.90115e+08	7.6502e+08		5.58394e+08	9.43817e+08	1.05764e+09	6.12194e+08		0.264852	0.271219	0.464106	0.427383	0.243818	0.166842
Q5M7W5	Microtubule-associated protein 4 OS=Rattus norvegicus GN=Map4 PE=1 SV=1 - [MAP4_RAT]	3.5108e+06	0	1.86097e+06	0	2.41484e+06	1.43459e+06	0	0	3.1632e+07	0	2.00442e+07	1.74919e+07		1.79059e+06	1.28314e+06	1.0544e+07	1.25121e+07		0.350872	0.227519	0.0840897	0.215153	0.440232	0.0755758
Q5PPJ9	Endophilin-B2 OS=Rattus norvegicus GN=Sh3glb2 PE=2 SV=2 - [SHLB2_RAT]	0	0	1.1697e+08	0	5.34608e+07	6.47815e+07	0	1.29296e+08	3.1407e+07	1.24154e+08	12097211	0		3.89899e+07	3.94141e+07	5.35675e+07	4.54172e+07		0.496369	0.40221	0.456707	0.381285	0.445156	0.44936
Q5RJQ4	NAD-dependent deacetylase sirtuin-2 OS=Rattus norvegicus GN=Sirt2 PE=1 SV=1 - [SIRT2_RAT]	0	0	1.54814e+08	1.09777e+08	117676890	6.67118e+07	1.15004e+08	0	1.35355e+08	8.30013e+07	1.3689e+08	4.0331e+07		5.16048e+07	9.80552e+07	8.34531e+07	8.67409e+07		0.219015	0.328789	0.290796	0.380954	0.475635	0.371188
Q5RKI0	WD repeat-containing protein 1 OS=Rattus norvegicus GN=Wdr1 PE=1 SV=3 - [WDR1_RAT]	0	5.48035e+06	29928168	0	0	32983106	0	5953365	73715416	3.50926e+07	40121845	5.3561e+07		1.18028e+07	1.09944e+07	2.65563e+07	4.29252e+07		0.478866	0.296032	0.0220173	0.291375	0.268549	0.0301437
Q5SGE0	Leucine-rich PPR motif-containing protein, mitochondrial OS=Rattus norvegicus GN=Lrpprc PE=1 SV=1 - [LPPRC_RAT]	0	7.46339e+06	2.14458e+08	1.6048e+08	5.35281e+07	90034420	1.73762e+08	2.25151e+06	9.31204e+07	49327395	2.63404e+07	6.68784e+07		7.39738e+07	1.01347e+08	8.97112e+07	4.75154e+07		0.370031	0.431838	0.364604	0.426199	0.226903	0.0917302
Q5XHZ0	Heat shock protein 75 kDa, mitochondrial OS=Rattus norvegicus GN=Trap1 PE=1 SV=1 - [TRAP1_RAT]	0	5.35442e+06	1.77236e+08	2.84737e+08	2.65302e+08	1.63715e+08	357580286	46155166	2.61418e+08	9.72375e+07	2.54993e+08	9.27724e+07		6.08633e+07	2.37918e+08	2.21718e+08	1.48334e+08		0.0314313	0.106894	0.165023	0.43923	0.264164	0.120767
Q5XI32	F-actin-capping protein subunit beta OS=Rattus norvegicus GN=Capzb PE=1 SV=1 - [CAPZB_RAT]	0	1.11527e+07	103409235	1.38028e+08	192235646	1.92557e+08	1.72359e+08	0	1.47682e+08	2.73397e+07	9.91664e+07	4.07692e+07		3.81873e+07	1.74274e+08	1.0668e+08	5.57584e+07		0.0110397	0.16906	0.339708	0.149859	0.215333	0.00711512
Q5XI78	2-oxoglutarate dehydrogenase, mitochondrial OS=Rattus norvegicus GN=Ogdh PE=1 SV=1 - [ODO1_RAT]	8.99866e+06	7.69675e+07	1.81814e+09	1.3631e+09	1.44285e+09	1.56684e+09	1.30136e+09	1.28079e+08	2.10383e+09	1.02712e+09	1.05933e+09	1.43046e+09		6.34703e+08	1.4576e+09	1.17776e+09	1.17231e+09		0.119426	0.27303	0.212572	0.326453	0.496524	0.0577762
Q5XIF3	NADH dehydrogenase [ubiquinone] iron-sulfur protein 4, mitochondrial OS=Rattus norvegicus GN=Ndufs4 PE=1 SV=1 - [NDUS4_RAT]	0	0	267688618	2.22076e+08	2.70989e+08	2.24233e+08	2.81757e+08	1.2826e+08	2.75263e+08	132601557	222943627	2.72122e+08		8.92295e+07	2.391e+08	2.28427e+08	2.09222e+08		0.0867993	0.122699	0.14428	0.424552	0.390627	0.26658
Q5XIH7	Prohibitin-2 OS=Rattus norvegicus GN=Phb2 PE=1 SV=1 - [PHB2_RAT]	0	1.76623e+07	42579860	66402450	5.27789e+07	4.79477e+07	8.34107e+07	1.49915e+06	1.36537e+08	4.49163e+07	5.47772e+07	9.52662e+07		2.00807e+07	5.57097e+07	7.38155e+07	6.49866e+07		0.0289955	0.130933	0.0426614	0.335862	0.422232	0.300559
Q5XII9	Protein FAM54B OS=Rattus norvegicus GN=Fam54b PE=2 SV=1 - [FA54B_RAT]	0	0	1.951e+08	1.16269e+08	4.74232e+07	1.04009e+08	2.52833e+07	11446386	2.59175e+07	6.94053e+07	1.01406e+08	1.20961e+08		6.50333e+07	8.92337e+07	2.08824e+07	9.72577e+07		0.370677	0.267736	0.32724	0.017313	0.00417315	0.386458
Q5XIM9	T-complex protein 1 subunit beta OS=Rattus norvegicus GN=Cct2 PE=1 SV=3 - [TCPB_RAT]	0	0	1.01771e+08	3.43243e+07	6.07676e+07	3.3265e+07	3.93669e+07	13377839	4.71188e+07	1.33528e+07	74089038	4.93574e+07		3.39237e+07	4.27856e+07	3.32879e+07	4.55998e+07		0.406548	0.49327	0.38765	0.261753	0.289113	0.446914
Q5XIN6	LETM1 and EF-hand domain-containing protein 1, mitochondrial OS=Rattus norvegicus GN=Letm1 PE=1 SV=1 - [LETM1_RAT]	7.42356e+07	0	4.74837e+08	5.2457e+08	6.23382e+08	6.42009e+08	5.20218e+08	3.43103e+07	4.82671e+08	2.98467e+08	4.23825e+08	201107890		1.83024e+08	5.96654e+08	3.45733e+08	3.078e+08		0.026414	0.245404	0.240731	0.0962649	0.416641	0.00876451
Q5XIT9	Methylcrotonoyl-CoA carboxylase beta chain, mitochondrial OS=Rattus norvegicus GN=Mccc2 PE=2 SV=1 - [MCCB_RAT]	1.10063e+07	0	1.0579e+08	1.18379e+08	1.15687e+08	7.11808e+07	6.44501e+07	0	6.69306e+07	6.76178e+07	6.60569e+07	22795082		3.8932e+07	1.01749e+08	4.37936e+07	52156581		0.0819614	0.454669	0.36824	0.047978	0.383527	0.039777
Q60587	Trifunctional enzyme subunit beta, mitochondrial OS=Rattus norvegicus GN=Hadhb PE=1 SV=1 - [ECHB_RAT]	0	7.31317e+06	1.36791e+08	162583279	6.74411e+07	1.5312e+08	2.06451e+08	6.51949e+06	1.759e+08	1.21966e+08	247677712	1.94188e+08		4.80347e+07	1.27715e+08	129623401	1.87944e+08		0.106199	0.172923	0.0357854	0.489652	0.231868	0.136164
Q62868	Rho-associated protein kinase 2 OS=Rattus norvegicus GN=Rock2 PE=1 SV=1 - [ROCK2_RAT]	0	0	3.51055e+07	6.75093e+06	4.78491e+07	3.71288e+07	0	0	5.01549e+07	2.33437e+07	0	6.80179e+06		1.17018e+07	3.05763e+07	1.67183e+07	1.00485e+07		0.164352	0.408958	0.454554	0.270488	0.365576	0.109911
Q62950	Dihydropyrimidinase-related protein 1 OS=Rattus norvegicus GN=Crmp1 PE=1 SV=1 - [DPYL1_RAT]	1.75352e+07	2.76698e+07	0	3.03125e+08	3.91068e+08	2.94442e+08	2.57603e+08	3.32918e+07	2.83408e+08	2.54479e+08	1.49193e+08	5.38197e+08		1.50683e+07	3.29545e+08	1.91434e+08	3.13957e+08		0.000297115	0.0458526	0.0310971	0.0901806	0.216534	0.451536
Q62951	Dihydropyrimidinase-related protein 4 (Fragment) OS=Rattus norvegicus GN=Dpysl4 PE=1 SV=1 - [DPYL4_RAT]	0	0	284145639	1.4648e+08	6.45616e+07	1.14251e+08	3.14327e+08	6.21657e+07	2.82556e+08	1.6973e+08	2.12776e+08	1.561e+08		94715213	1.08431e+08	2.19683e+08	1.79535e+08		0.447553	0.184455	0.213961	0.125098	0.323285	0.0361661
Q62952	Dihydropyrimidinase-related protein 3 OS=Rattus norvegicus GN=Dpysl3 PE=1 SV=2 - [DPYL3_RAT]	0	0	8.0944e+07	197594910	3.74335e+07	9.18601e+07	1.32127e+08	9.66485e+07	198972484	5.90537e+07	187053511	1.29321e+08		2.69813e+07	1.08963e+08	1.42583e+08	1.25143e+08		0.102501	0.0228441	0.0493642	0.289574	0.366421	0.400116
Q63028	Alpha-adducin OS=Rattus norvegicus GN=Add1 PE=1 SV=2 - [ADDA_RAT]	0	0	8.65589e+07	0	1.33972e+08	9.90707e+07	1.0964e+08	3.87003e+07	6.23198e+07	46824972	9.51113e+07	5.57874e+07		2.8853e+07	7.7681e+07	7.02201e+07	6.59079e+07		0.189548	0.154931	0.158542	0.43848	0.437181	0.398393
Q63092	CaM kinase-like vesicle-associated protein OS=Rattus norvegicus GN=Camkv PE=1 SV=1 - [CAMKV_RAT]	0	0	1.08825e+08	1.44938e+07	5.84042e+07	2.81481e+07	2.42346e+07	0	4.8457e+07	5.33929e+07	7.61309e+07	1.3844e+07		3.62749e+07	3.3682e+07	2.42305e+07	4.77893e+07		0.474785	0.386093	0.395352	0.323153	0.181358	0.281085
Q63345	Myelin-oligodendrocyte glycoprotein OS=Rattus norvegicus GN=Mog PE=1 SV=1 - [MOG_RAT]	1.39751e+07	9.23168e+06	8.72861e+07	1.65226e+08	200435574	2.00453e+08	1.6657e+08	0	0	4.58219e+07	1.23563e+08	0		3.6831e+07	1.88705e+08	5.55235e+07	5.64617e+07		0.00275049	0.387283	0.339399	0.0393966	0.494686	0.012598
Q63362	NADH dehydrogenase [ubiquinone] 1 alpha subcomplex subunit 5 OS=Rattus norvegicus GN=Ndufa5 PE=1 SV=3 - [NDUA5_RAT]	0	0	8.37456e+07	1.38776e+08	0	6.81429e+07	102596847	0	1.14956e+08	1.18101e+07	7.87057e+07	0		2.79152e+07	6.89731e+07	7.25177e+07	3.01719e+07		0.223882	0.193099	0.477235	0.475476	0.194726	0.227562
Q63537	Synapsin-2 OS=Rattus norvegicus GN=Syn2 PE=1 SV=1 - [SYN2_RAT]	0	9.37154e+07	1.91347e+08	6.29296e+08	3.30241e+08	4.23729e+08	8.51245e+08	1.39079e+08	7.37191e+08	2.19227e+08	2.58003e+08	5.70312e+08		9.50207e+07	461088554	5.75838e+08	3.49181e+08		0.0122935	0.0511254	0.0549717	0.327355	0.205566	0.237301
Q63560	Microtubule-associated protein 6 OS=Rattus norvegicus GN=Map6 PE=1 SV=1 - [MAP6_RAT]	0	4.2294e+07	2.5745e+08	4.98129e+08	4.26492e+08	1.25125e+08	2.68207e+08	8.51318e+06	2.35e+08	3.31437e+08	2.20112e+08	2.01988e+08		9.99145e+07	3.49916e+08	1.70573e+08	2.51179e+08		0.0736084	0.284579	0.0829392	0.135319	0.213075	0.230555
Q63564	Synaptic vesicle glycoprotein 2B OS=Rattus norvegicus GN=Sv2b PE=1 SV=1 - [SV2B_RAT]	1.66531e+07	0	3.63439e+08	4.45844e+07	66793340	0	0	2.43236e+07	5.14349e+07	1.40541e+07	0	1.03241e+08		1.26697e+08	3.71259e+07	2.52528e+07	3.90984e+07		0.248588	0.221692	0.25752	0.327442	0.358489	0.480456
Q63617	Hypoxia up-regulated protein 1 OS=Rattus norvegicus GN=Hyou1 PE=1 SV=1 - [HYOU1_RAT]	0	0	3.78561e+07	37408048	0	0	1.74122e+07	0	20404197	0	0	16682256		1.26187e+07	1.24693e+07	1.26055e+07	5560752		0.496843	0.499648	0.317866	0.496354	0.225657	0.319732
Q63633	Solute carrier family 12 member 5 OS=Rattus norvegicus GN=Slc12a5 PE=1 SV=2 - [S12A5_RAT]	0	6.2884e+06	9.4462e+07	109611518	6.17037e+07	90412166	1.72138e+07	5.10655e+06	1.21721e+08	5.03786e+07	8.67421e+07	9.07706e+07		3.35835e+07	8.72425e+07	4.80139e+07	7.59638e+07		0.0923392	0.389249	0.134739	0.188702	0.257536	0.291798
Q63716	Peroxiredoxin-1 OS=Rattus norvegicus GN=Prdx1 PE=1 SV=1 - [PRDX1_RAT]	0	0	2.54907e+08	2.9201e+08	2.16493e+08	2.08245e+08	2.90723e+08	1.72271e+07	220548427	1.59452e+08	2.36308e+08	1.97876e+08		8.49691e+07	2.38916e+08	1.76166e+08	1.97879e+08		0.0794581	0.241527	0.133962	0.25356	0.405445	0.151099
Q63965	Sideroflexin-1 OS=Rattus norvegicus GN=Sfxn1 PE=2 SV=4 - [SFXN1_RAT]	40584504	4.51753e+06	2.83535e+08	239191338	2.36283e+08	1.46625e+08	1.59439e+08	6.607e+06	2.30066e+08	1.40489e+08	7.22717e+07	1.49532e+08		1.09546e+08	2.07367e+08	1.32037e+08	1.20764e+08		0.175495	0.423753	0.453888	0.179055	0.440195	0.0451589
Q641Z6	EH domain-containing protein 1 OS=Rattus norvegicus GN=Ehd1 PE=1 SV=1 - [EHD1_RAT]	0	1.71814e+07	299044773	1.77858e+08	1.51325e+08	1.92478e+08	3.28807e+08	0	3.49886e+08	1.46573e+08	137590046	7.25259e+07		1.05409e+08	1.73887e+08	2.26231e+08	1.18896e+08		0.260976	0.231598	0.449468	0.334874	0.202957	0.0521517
Q64428	Trifunctional enzyme subunit alpha, mitochondrial OS=Rattus norvegicus GN=Hadha PE=1 SV=2 - [ECHA_RAT]	0	0	1.00918e+09	6.73682e+08	6.69113e+08	3.14912e+08	6.70974e+08	7.01798e+07	9.63916e+08	4.46249e+08	6.86593e+08	6.98463e+08		3.36395e+08	5.52569e+08	5.68357e+08	6.10435e+08		0.288633	0.307925	0.236504	0.479502	0.443018	0.35462
Q64542	Plasma membrane calcium-transporting ATPase 4 OS=Rattus norvegicus GN=Atp2b4 PE=2 SV=1 - [AT2B4_RAT]	0	3.99085e+07	3.06946e+08	2.22737e+08	2.864e+08	2.58049e+08	3.23033e+08	9.61364e+07	6.46294e+08	1.86725e+07	4.39923e+07	1.98839e+08		1.15618e+08	2.55729e+08	3.55154e+08	8.71681e+07		0.113204	0.134125	0.405677	0.284786	0.0942721	0.0233136
Q64548	Reticulon-1 OS=Rattus norvegicus GN=Rtn1 PE=2 SV=1 - [RTN1_RAT]	0	0	347453583	2.04072e+08	269126947	1.21501e+08	2.60885e+08	4.45423e+07	1.67517e+08	1.22409e+08	1.74153e+08	2.41629e+08		115817861	1.98233e+08	1.57648e+08	1.79397e+08		0.270456	0.383312	0.313321	0.310423	0.388118	0.374436
Q64568	Plasma membrane calcium-transporting ATPase 3 OS=Rattus norvegicus GN=Atp2b3 PE=2 SV=2 - [AT2B3_RAT]	0	0	3.46118e+08	1.72821e+08	1.28609e+08	1.50731e+08	2.5141e+08	1.76087e+08	123387469	9.97325e+07	1.37033e+08	2.03163e+08		1.15373e+08	1.5072e+08	1.83628e+08	1.46643e+08		0.387959	0.301706	0.403066	0.224649	0.24157	0.453569
Q66HA8	Heat shock protein 105 kDa OS=Rattus norvegicus GN=Hsph1 PE=1 SV=1 - [HS105_RAT]	0	1.24492e+07	2.17703e+08	3.31822e+07	5.18921e+07	69045192	2.56573e+07	0	35593217	1.1087e+08	9.02029e+07	7.23545e+07		7.67175e+07	5.13732e+07	2.04168e+07	9.11426e+07		0.370168	0.23718	0.424934	0.0525001	0.00501128	0.0295196
Q66HD0	Endoplasmin OS=Rattus norvegicus GN=Hsp90b1 PE=1 SV=2 - [ENPL_RAT]	1.09242e+07	9135097	3.36344e+08	0	7.98006e+07	1.3854e+08	7.90518e+07	1.48874e+08	3.68668e+08	1.68937e+08	2.26995e+08	121031038		1.18801e+08	7.27801e+07	1.98865e+08	1.72321e+08		0.355846	0.298308	0.330235	0.129776	0.39418	0.0600106
Q66HF1	NADH-ubiquinone oxidoreductase 75 kDa subunit, mitochondrial OS=Rattus norvegicus GN=Ndufs1 PE=1 SV=1 - [NDUS1_RAT]	1.04754e+07	2.70695e+07	4.95822e+08	5.01923e+08	6.08999e+08	5.00533e+08	3.43516e+08	1.40894e+08	6.77592e+08	3.46442e+08	5.38244e+08	3.27612e+08		1.77789e+08	5.37152e+08	3.87334e+08	4.04099e+08		0.0461511	0.200434	0.130157	0.201775	0.463163	0.0780334
Q66HF8	Aldehyde dehydrogenase X, mitochondrial OS=Rattus norvegicus GN=Aldh1b1 PE=1 SV=1 - [AL1B1_RAT]	0	5.4722e+06	47171926	1.24819e+08	1.42584e+08	1.11691e+08	1.08859e+08	5.4606e+07	1.85943e+08	3.23767e+07	1.36491e+08	7.22788e+07		1.7548e+07	1.26364e+08	1.16469e+08	8.03822e+07		0.00165939	0.0364648	0.0682269	0.406441	0.249914	0.109787
Q68FQ0	T-complex protein 1 subunit epsilon OS=Rattus norvegicus GN=Cct5 PE=1 SV=1 - [TCPE_RAT]	0	0	7.13237e+07	7.04762e+07	5.75769e+07	4.48503e+07	68736515	0	9.6075e+07	4.40658e+07	1.59789e+07	58523363		2.37746e+07	5.76345e+07	5.49372e+07	3.95227e+07		0.122732	0.224529	0.294551	0.465797	0.323532	0.1401
Q68FU3	Electron transfer flavoprotein subunit beta OS=Rattus norvegicus GN=Etfb PE=2 SV=3 - [ETFB_RAT]	1.57339e+07	1.55075e+07	5.57624e+08	3.92605e+08	3.57486e+08	2.35526e+08	4.44941e+08	0	268237323	3.19248e+08	2.99986e+08	3.17126e+08		1.96288e+08	3.28539e+08	2.37726e+08	3.1212e+08		0.25905	0.430568	0.278271	0.272982	0.298193	0.37473
Q68FX0	Isocitrate dehydrogenase [NAD] subunit beta, mitochondrial OS=Rattus norvegicus GN=Idh3B PE=1 SV=1 - [IDH3B_RAT]	0	3.78763e+07	2.20985e+09	1.15213e+09	1.03318e+09	9.66686e+08	1814214123	3.43164e+08	2.33685e+09	4.98393e+08	1.83217e+09	1.58404e+09		7.49242e+08	1.05066e+09	1.49808e+09	1.30487e+09		0.350881	0.235845	0.271639	0.24841	0.401362	0.285815
Q68FY0	Cytochrome b-c1 complex subunit 1, mitochondrial OS=Rattus norvegicus GN=Uqcrc1 PE=1 SV=1 - [QCR1_RAT]	1.10487e+08	1.28491e+08	1.82197e+09	1.13508e+09	1.45858e+09	8.66854e+08	1.15804e+09	4.18449e+08	1.29025e+09	1.03649e+09	1.02559e+09	1.40719e+09		6.86982e+08	1.1535e+09	9.55578e+08	1.15642e+09		0.237631	0.345676	0.232279	0.285261	0.269186	0.494834
Q6AYH5	Dynactin subunit 2 OS=Rattus norvegicus GN=Dctn2 PE=1 SV=1 - [DCTN2_RAT]	8.36744e+06	7.87583e+06	2.85009e+08	2.18557e+08	3.31095e+08	2.20746e+08	3.60703e+08	5.51994e+07	2.47414e+08	147537139	1.18977e+08	1.07358e+07		1.00417e+08	2.56799e+08	2.21106e+08	9.24167e+07		0.09555	0.200121	0.47041	0.365239	0.13056	0.021096
Q6J4I0	Protein phosphatase 1 regulatory subunit 1B OS=Rattus norvegicus GN=Ppp1r1b PE=2 SV=1 - [PPR1B_RAT]	2.37879e+06	4.34959e+06	1.31286e+08	1.15699e+08	1.60954e+08	2.13073e+07	1.03639e+07	0	0	1.68206e+07	8.90048e+07	9.27561e+07		4.60049e+07	9.93202e+07	3.45463e+06	6.61939e+07		0.209547	0.188127	0.351534	0.0404672	0.0328694	0.263981
Q6MG60	N(G),N(G)-dimethylarginine dimethylaminohydrolase 2 OS=Rattus norvegicus GN=Ddah2 PE=1 SV=1 - [DDAH2_RAT]	0	0	0	0	7.53859e+07	0	1.77845e+07	0	8.23025e+07	3.54228e+07	0	13245724		0	2.51286e+07	3.33624e+07	1.62228e+07		0.18695	0.126493	0.0957586	0.413863	0.280402	0.37976
Q6NYB7	Ras-related protein Rab-1A OS=Rattus norvegicus GN=Rab1A PE=1 SV=3 - [RAB1A_RAT]	0	1.97879e+06	1.06561e+08	8.81993e+07	7.23591e+06	8.94536e+07	1.0903e+08	4.9023e+07	1.05845e+08	9.00275e+07	1.01667e+08	6.31881e+07		3.61799e+07	6.16296e+07	8.79661e+07	8.49607e+07		0.298918	0.133735	0.12886	0.237638	0.450267	0.236554
Q6P502	T-complex protein 1 subunit gamma OS=Rattus norvegicus GN=Cct3 PE=1 SV=1 - [TCPG_RAT]	0	4523839	2.48745e+08	6.12299e+07	4.88347e+07	0	5.71146e+07	1.53873e+06	2.08752e+08	5.05946e+07	7.65777e+07	8.36545e+07		8.44231e+07	3.66882e+07	8.91352e+07	7.02756e+07		0.300679	0.482834	0.436301	0.231471	0.389337	0.0943209
Q6P6R2	Dihydrolipoyl dehydrogenase, mitochondrial OS=Rattus norvegicus GN=Dld PE=1 SV=1 - [DLDH_RAT]	0	8.21822e+06	0	1.39153e+08	149866060	9.65687e+07	0	0	1.67533e+08	1.22381e+08	1.619e+08	1.43361e+08		2.73941e+06	1.28529e+08	5.58444e+07	1.42548e+08		0.000795788	0.197998	0.000142388	0.139791	0.101436	0.259815
Q6P9T8	Tubulin beta-2C chain OS=Rattus norvegicus GN=Tubb2c PE=1 SV=1 - [TBB2C_RAT]	6.27782e+08	1.2501e+08	3.07584e+09	3.54761e+09	4.06637e+09	3.71384e+09	3.18283e+09	2.13473e+09	3.54287e+09	3.02718e+09	2.60158e+09	3.334e+09		1.27621e+09	3.77594e+09	2.95347e+09	2.98758e+09		0.0269133	0.0851537	0.0707225	0.0705341	0.472971	0.0197268
Q6P9V9	Tubulin alpha-1B chain OS=Rattus norvegicus GN=Tuba1b PE=1 SV=1 - [TBA1B_RAT]	0	0	1.63566e+07	1.24943e+07	0	0	34805808	0	0	2.4416e+07	0	6.1662e+06		5.45221e+06	4.16476e+06	11601936	1.01941e+07		0.430143	0.328236	0.315562	0.289414	0.461614	0.257021
Q6PCU2	V-type proton ATPase subunit E 1 OS=Rattus norvegicus GN=Atp6v1e1 PE=1 SV=1 - [VATE1_RAT]	0	4.7527e+07	4.05636e+08	3.21214e+08	6.39338e+08	209524841	4.21464e+08	7.08612e+06	3.99242e+08	1.81818e+08	306013539	3.75294e+08		1.51055e+08	3.90025e+08	2.75931e+08	2.87709e+08		0.129248	0.269117	0.192111	0.286632	0.469788	0.253617
Q6Q0N1	Cytosolic non-specific dipeptidase OS=Rattus norvegicus GN=Cndp2 PE=1 SV=1 - [CNDP2_RAT]	0	0	44042722	2.89045e+07	3.7809e+07	4.50146e+07	3.25034e+07	0	1.00717e+07	1.68872e+07	2.80551e+07	0		1.46809e+07	3.72427e+07	1.41917e+07	1.49808e+07		0.108416	0.489545	0.493305	0.0484982	0.476536	0.0383965
Q6RJR6	Reticulon-3 OS=Rattus norvegicus GN=Rtn3 PE=1 SV=1 - [RTN3_RAT]	1.93133e+07	0	6.26682e+07	0	23739458	0	50440238	0	9.07669e+07	24563176	0	26606849		2.73272e+07	7.91315e+06	4.7069e+07	17056675		0.194916	0.286112	0.320601	0.113258	0.169098	0.238191
Q6RUV5	Ras-related C3 botulinum toxin substrate 1 OS=Rattus norvegicus GN=Rac1 PE=1 SV=1 - [RAC1_RAT]	0	0	3.61943e+08	2.50816e+08	219607498	1.01997e+08	2.40159e+08	0	5.97894e+08	7.24477e+07	4.11188e+08	1.53102e+08		1.20648e+08	1.90807e+08	2.79351e+08	2.12246e+08		0.307548	0.247374	0.296691	0.32385	0.37793	0.428607
Q704S8	Carnitine O-acetyltransferase OS=Rattus norvegicus GN=Crat PE=1 SV=1 - [CACP_RAT]	0	0	220621911	171593455	1.52303e+08	1.01327e+08	1.9791e+08	0	2.28459e+08	9.29864e+07	1.77189e+08	1.3967e+08		73540637	1.41741e+08	1.42123e+08	1.36615e+08		0.211433	0.270305	0.230614	0.498081	0.472721	0.440492
Q75Q39	Mitochondrial import receptor subunit TOM70 OS=Rattus norvegicus GN=Tomm70a PE=1 SV=1 - [TOM70_RAT]	0	3.87184e+07	3.5163e+08	163770289	177975001	1.63169e+08	1.32815e+08	0	2.78202e+08	8.99762e+07	7.14313e+07	1.82681e+08		1.30116e+08	1.68305e+08	1.37005e+08	1.14696e+08		0.374527	0.481191	0.450553	0.358585	0.405554	0.0988869
Q792I0	Protein lin-7 homolog C OS=Rattus norvegicus GN=Lin7c PE=1 SV=1 - [LIN7C_RAT]	0	0	1.74955e+07	0	1.43543e+07	0	0	6.47341e+07	29794978	3.02668e+07	8.85693e+06	0		5.83184e+06	4.78477e+06	3.15097e+07	1.30413e+07		0.448156	0.130112	0.268892	0.119276	0.211892	0.231397
Q794F9	4F2 cell-surface antigen heavy chain OS=Rattus norvegicus GN=Slc3a2 PE=1 SV=1 - [4F2_RAT]	0	0	2.55519e+08	2.93956e+08	2.13353e+08	4.73795e+07	3.34018e+08	4.7457e+07	2.97433e+08	1.0632e+08	2.77288e+08	1.9303e+08		8.51731e+07	1.84896e+08	2.26303e+08	1.92213e+08		0.211614	0.159209	0.169007	0.369217	0.378283	0.468788
Q7TQ16	Cytochrome b-c1 complex subunit 8 OS=Rattus norvegicus GN=Uqcrq PE=2 SV=1 - [QCR8_RAT]	0	0	285788763	1.80612e+08	1.6534e+08	1.43916e+08	1.58497e+08	0	0	145803273	1.62154e+08	1.08588e+08		95262921	1.63289e+08	5.28324e+07	1.38848e+08		0.258543	0.358373	0.337572	0.0548743	0.096952	0.134833
Q80ZA5	Sodium-driven chloride bicarbonate exchanger OS=Rattus norvegicus GN=Slc4a10 PE=2 SV=1 - [S4A10_RAT]	0	0	0	1.31399e+07	1.27597e+07	0	3.89637e+07	1.55517e+07	2.27049e+06	0	1.30085e+07	1.4872e+06		0	8.63321e+06	1.89286e+07	4.83191e+06		0.0581011	0.076188	0.152507	0.211783	0.143518	0.279201
Q8R491	EH domain-containing protein 3 OS=Rattus norvegicus GN=Ehd3 PE=1 SV=2 - [EHD3_RAT]	0	15434960	138941854	9.74697e+07	1.28018e+08	5.89824e+07	1.71284e+08	0	1.86002e+08	0	2.67819e+07	5.12635e+07		51458938	9.48234e+07	1.19095e+08	2.60151e+07		0.209983	0.206623	0.306281	0.359723	0.102376	0.0252235
Q8VBU2	Protein NDRG2 OS=Rattus norvegicus GN=Ndrg2 PE=1 SV=1 - [NDRG2_RAT]	0	5.0899e+07	1.82966e+08	4.8946e+08	1.64927e+08	1.97274e+08	6.65861e+08	0	3.84623e+08	1.25701e+08	1.7736e+08	2.70088e+08		7.79551e+07	2.83887e+08	3.50161e+08	1.9105e+08		0.0762308	0.123102	0.0881994	0.388559	0.23287	0.225976
Q8VHF5	Citrate synthase, mitochondrial OS=Rattus norvegicus GN=Cs PE=1 SV=1 - [CISY_RAT]	2.18509e+08	2.04115e+08	4.2355e+09	2.9187e+09	1.09119e+09	2.47871e+09	4.33088e+09	6.9385e+08	4.92579e+09	1.21987e+09	1.74998e+09	1.7835e+09		1.55271e+09	2.16287e+09	3.31684e+09	1.58445e+09		0.347768	0.201029	0.491209	0.232863	0.132123	0.187595
Q91Y81	Septin-2 OS=Rattus norvegicus GN=Sept2 PE=1 SV=1 - [SEPT2_RAT]	0	0	1.98223e+08	8.00288e+07	1.74044e+08	0	2.29549e+08	4.74284e+07	1.36991e+08	1.12996e+08	2.89013e+08	294060333		6.60742e+07	8.4691e+07	1.3799e+08	2.32023e+08		0.416797	0.22119	0.0677352	0.252229	0.150993	0.0658395
Q91ZN1	Coronin-1A OS=Rattus norvegicus GN=Coro1a PE=1 SV=3 - [COR1A_RAT]	0	0	1.26232e+08	1.02334e+08	1.10253e+08	7.17747e+07	1.14051e+08	0	1.05842e+08	6.16655e+07	4.19504e+07	31211163		4.20775e+07	9.47874e+07	7.32977e+07	4.49424e+07		0.147021	0.30299	0.475046	0.303486	0.247402	0.0138601
Q920L2	Succinate dehydrogenase [ubiquinone] flavoprotein subunit, mitochondrial OS=Rattus norvegicus GN=Sdha PE=1 SV=1 - [DHSA_RAT]	0	1.24003e+07	8.38442e+08	2.33119e+08	4.25644e+08	2.10605e+08	4.58451e+08	0	3.78252e+08	2.88992e+08	3.17603e+08	3.07646e+08		2.83614e+08	2.89789e+08	2.78901e+08	3.04747e+08		0.491895	0.494324	0.471483	0.474013	0.432026	0.419208
Q924S5	Lon protease homolog, mitochondrial OS=Rattus norvegicus GN=Lonp1 PE=2 SV=1 - [LONM_RAT]	0	0	40587795	3.34039e+07	3.47397e+07	6.47841e+07	2.68518e+07	0	1.16998e+08	2.84562e+07	73216679	3.51789e+07		13529265	4.43092e+07	47949860	4.56173e+07		0.0719597	0.20747	0.08693	0.463013	0.477016	0.471674
Q99MZ8	LIM and SH3 domain protein 1 OS=Rattus norvegicus GN=Lasp1 PE=1 SV=1 - [LASP1_RAT]	1.32667e+07	1.07533e+07	8.76218e+07	7.68169e+07	0	7.74971e+07	24430660	4.29173e+06	2.58402e+07	6.70215e+07	5.96036e+07	8.79533e+07		3.72139e+07	5.1438e+07	1.81875e+07	7.15261e+07		0.356528	0.25364	0.133335	0.140063	0.00414184	0.24973
Q99NA5	Isocitrate dehydrogenase [NAD] subunit alpha, mitochondrial OS=Rattus norvegicus GN=Idh3a PE=1 SV=1 - [IDH3A_RAT]	1.19651e+08	4.97959e+08	3.66641e+09	2.34497e+09	2.53666e+09	1.64264e+09	2.32146e+09	8.70202e+08	2786162130	2.38827e+09	1.2135e+09	2.55643e+09		1.42801e+09	2.17476e+09	1.99261e+09	2.05273e+09		0.276888	0.339102	0.315237	0.394687	0.468518	0.409999
Q99P39	Cysteine desulfurase, mitochondrial OS=Rattus norvegicus GN=Nfs1 PE=2 SV=1 - [NFS1_RAT]	0	0	3.24314e+07	1.36815e+08	1.23055e+08	0	8.85327e+07	0	3.4577e+07	0	9.92708e+07	1.0273e+08		1.08105e+07	8.66232e+07	4.10366e+07	6.73336e+07		0.082989	0.170073	0.0926564	0.209073	0.284368	0.371768
Q9ER34	Aconitate hydratase, mitochondrial OS=Rattus norvegicus GN=Aco2 PE=1 SV=2 - [ACON_RAT]	4.854e+08	3.90777e+08	8.21374e+09	4.28257e+09	5.79186e+09	4.37242e+09	5.59051e+09	1.54117e+09	5.87263e+09	3.86244e+09	4.42664e+09	4.56825e+09		3.02997e+09	4.81561e+09	4.33477e+09	4.28578e+09		0.267778	0.340344	0.327229	0.380933	0.487025	0.188725
Q9JI66	Electrogenic sodium bicarbonate cotransporter 1 OS=Rattus norvegicus GN=Slc4a4 PE=1 SV=1 - [S4A4_RAT]	0	0	4.22867e+08	147567816	4.01112e+08	2.80157e+08	3.77654e+08	5.10697e+08	3.66376e+08	2.86798e+08	2.57048e+08	220407780		1.40956e+08	2.76279e+08	4.18242e+08	2.54751e+08		0.221119	0.0675103	0.234282	0.0883471	0.0155507	0.395106
Q9JJ19	Na(+)/H(+) exchange regulatory cofactor NHE-RF1 OS=Rattus norvegicus GN=Slc9a3r1 PE=1 SV=3 - [NHRF1_RAT]	6.05716e+06	1.66946e+07	1.66498e+08	2.49022e+08	2.75371e+08	3.34189e+08	4.32212e+08	2.05403e+08	2.09088e+08	1.8493e+08	1.26608e+08	2.17019e+08		6.30834e+07	2.86194e+08	2.82235e+08	1.76186e+08		0.0089663	0.0370012	0.0618716	0.481242	0.126624	0.019738
Q9JJM9	Septin-5 OS=Rattus norvegicus GN=Sept5 PE=1 SV=2 - [SEPT5_RAT]	1.0523e+06	0	4.35563e+08	2.63002e+08	1.39142e+08	1.52968e+08	1.90023e+08	6.10899e+07	0	2.30529e+08	1.79295e+08	2.77549e+08		1.45539e+08	1.85037e+08	8.37044e+07	2.29124e+08		0.402789	0.355558	0.300918	0.106181	0.040739	0.206847
Q9JK11	Reticulon-4 OS=Rattus norvegicus GN=Rtn4 PE=1 SV=1 - [RTN4_RAT]	0	1.81719e+07	5.8346e+07	92381520	7.71109e+07	1.17923e+07	1.26377e+08	1.33832e+07	9.39207e+07	0	14028144	2.81288e+07		2.5506e+07	6.04282e+07	7.78935e+07	1.40523e+07		0.15547	0.118775	0.290088	0.348429	0.069197	0.074605
Q9JLJ3	4-trimethylaminobutyraldehyde dehydrogenase OS=Rattus norvegicus GN=Aldh9a1 PE=1 SV=1 - [AL9A1_RAT]	8700563	0	3.54693e+07	6.10593e+07	29634048	4.8452e+07	1.14485e+08	0	154601374	6.55365e+07	2.52949e+07	5.10117e+07		1.47233e+07	4.63818e+07	8.96955e+07	4.7281e+07		0.0436287	0.0949324	0.0548712	0.205406	0.212471	0.477374
Q9QUL6	Vesicle-fusing ATPase OS=Rattus norvegicus GN=Nsf PE=1 SV=1 - [NSF_RAT]	0	1.62087e+07	1025928227	1.13934e+09	4.59697e+08	1.10546e+09	2.03084e+09	3.02091e+08	1.4975e+09	1.10028e+09	1.0404e+09	1259489101		3.47379e+08	9.01497e+08	1.27681e+09	1.13339e+09		0.121533	0.10217	0.0426429	0.26864	0.397272	0.18573
Q9QWN8	Spectrin beta chain, brain 2 OS=Rattus norvegicus GN=Sptbn2 PE=1 SV=2 - [SPTN2_RAT]	0	0	6.21597e+07	9.29744e+07	1.43988e+08	7.40235e+07	8.74246e+07	0	88637605	6.83321e+07	9.85646e+07	3.94796e+07		2.07199e+07	1.03662e+08	5.86874e+07	6.87921e+07		0.0239425	0.17508	0.073873	0.139967	0.390379	0.132841
Q9QXU9	ProSAAS OS=Rattus norvegicus GN=Pcsk1n PE=1 SV=1 - [PCSK1_RAT]	0	1.0108e+07	188821770	26328345	1.41391e+08	3.5317e+07	6.69554e+07	0	3.22834e+07	1.74669e+07	7.49966e+07	3.03946e+07		6.63099e+07	6.76788e+07	3.30796e+07	4.09527e+07		0.492831	0.316279	0.355567	0.22667	0.388676	0.274333
Q9R063	Peroxiredoxin-5, mitochondrial OS=Rattus norvegicus GN=Prdx5 PE=1 SV=1 - [PRDX5_RAT]	0	0	2.14713e+08	1.18509e+08	3.51072e+07	41151428	1.78981e+08	0	1.39841e+08	86673949	3.87807e+07	3.7575e+07		7.15709e+07	6.49224e+07	1.06274e+08	5.43432e+07		0.467436	0.359498	0.41295	0.26623	0.205699	0.376342
Q9WTP0	Band 4.1-like protein 1 OS=Rattus norvegicus GN=Epb41l1 PE=1 SV=1 - [E41L1_RAT]	3.47452e+07	4.72519e+07	7.2018e+08	2.12892e+08	6.62674e+08	3.94304e+08	2.27719e+08	1.46314e+08	7.30061e+08	3.49488e+08	2.3029e+08	2.61657e+08		2.67392e+08	4.2329e+08	3.68031e+08	2.80478e+08		0.29152	0.373376	0.478606	0.408833	0.331172	0.175566
Q9WU34	Neuronal-specific septin-3 OS=Rattus norvegicus GN=Sept3 PE=1 SV=2 - [SEPT3_RAT]	0	0	5.58687e+07	5.9583e+07	0	5.47921e+07	3.47343e+07	0	0	0	7.14383e+07	8.89881e+07		1.86229e+07	3.8125e+07	1.15781e+07	5.34755e+07		0.252697	0.382049	0.175076	0.150277	0.114763	0.334176
Q9WU82	Catenin beta-1 OS=Rattus norvegicus GN=Ctnnb1 PE=1 SV=1 - [CTNB1_RAT]	0	2.50038e+07	0	2.8226e+07	6.14853e+07	3.9651e+07	72178476	0	1.19446e+08	0	0	0		8.33461e+06	4.31208e+07	6.38747e+07	0		0.0267434	0.0974556	0.18695	0.297948	0.0698659	0.00575707
Q9WVC0	Septin-7 OS=Rattus norvegicus GN=Sept7 PE=1 SV=1 - [SEPT7_RAT]	2.79189e+08	1.39865e+08	1.9727e+09	1.18978e+09	1.06713e+09	1.22312e+09	1.71079e+09	7.33749e+08	9.40706e+08	1.50093e+09	1.10737e+09	1.66632e+09		7.9725e+08	1.16001e+09	1.12841e+09	1.42487e+09		0.286268	0.321059	0.181533	0.460731	0.216446	0.0996585
Q9WVE9	Intersectin-1 OS=Rattus norvegicus GN=Itsn1 PE=1 SV=1 - [ITSN1_RAT]	0	0	30101825	4.2806e+07	26422328	1.37162e+07	1.22373e+07	8.16121e+06	12596056	1.63744e+07	0	0		1.00339e+07	2.76482e+07	1.09982e+07	5.45814e+06		0.124949	0.464387	0.354595	0.0614891	0.190804	0.0457395
Q9Z2L0	Voltage-dependent anion-selective channel protein 1 OS=Rattus norvegicus GN=Vdac1 PE=1 SV=4 - [VDAC1_RAT]	1.22656e+08	5.87437e+06	1.0694e+09	9.8739e+08	3.78952e+08	2.02283e+08	1110516226	3.64477e+08	6.35688e+08	5.79893e+08	4.8903e+08	7.03529e+08		3.99312e+08	5.22875e+08	7.0356e+08	5.90817e+08		0.389653	0.245212	0.302908	0.302655	0.322534	0.397955
